# Supplementary material for: PPARβ/δ Ligands Regulate Oxidative Status and Inflammatory Response in Inflamed Corpus Luteum—An In Vitro Study
Source: MDPI journal article supplement (doi:10.3390/ijms24054993), 2023-03-05
Supplement: s1 [file s1]

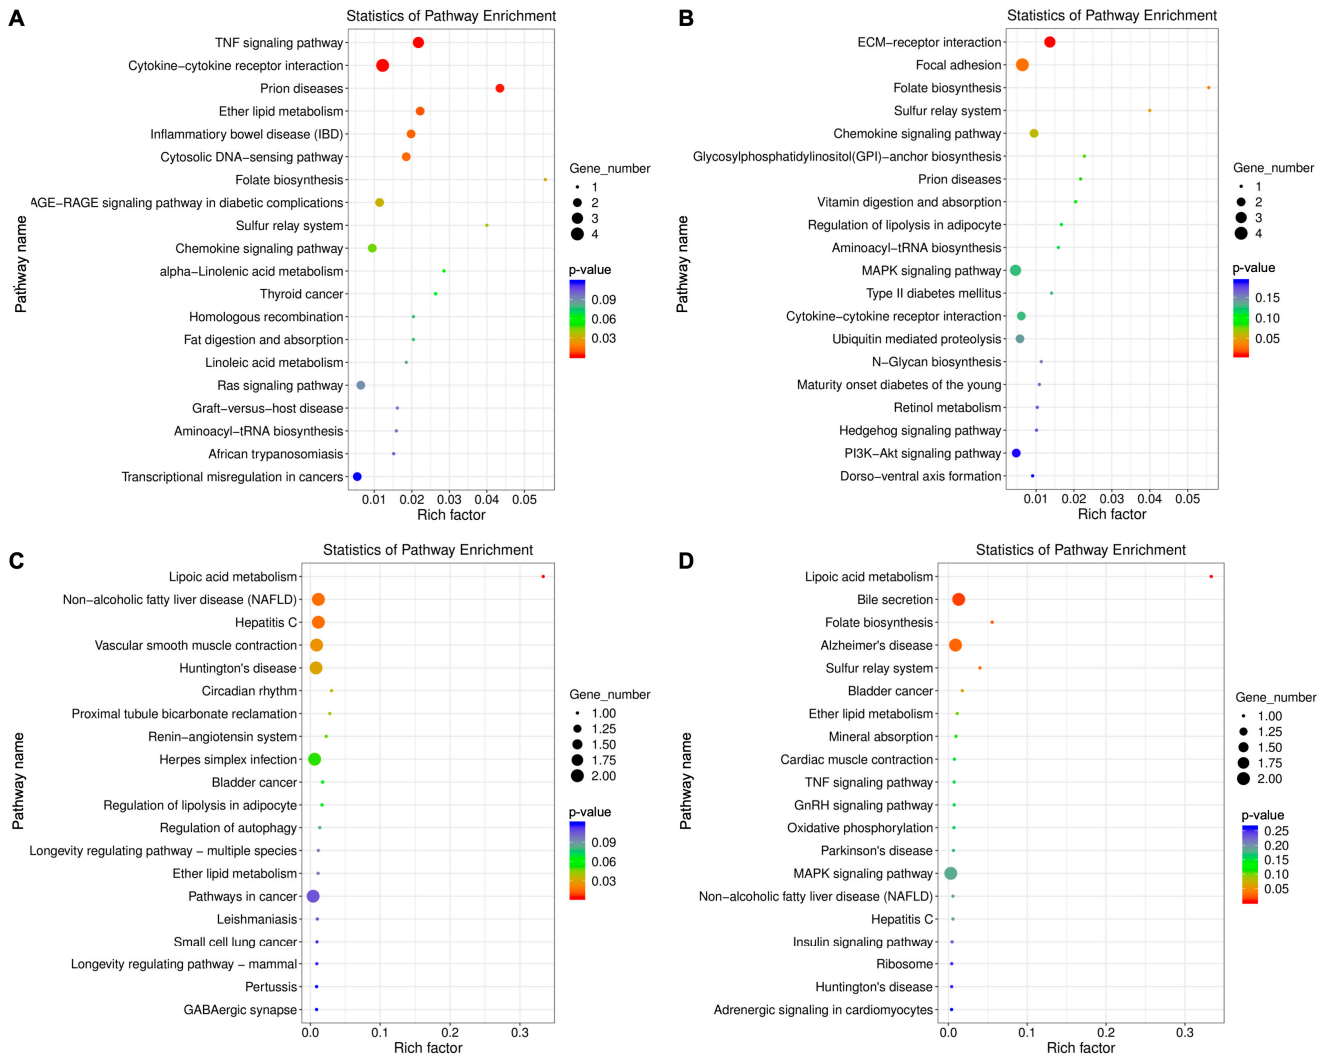

**Figure S1:** KEEG analysis of differentially expressed genes in the corpus luteum after LPS (A); treatment or LPS in combination with: GW0724 at a concentration of 1  $\mu\text{mol/L}$  (B); GW0724 at a concentration of 10  $\mu\text{mol/L}$  (C); GSK3787 treatment (D). The color indicates the  $p$  value of each pathway, while the size of the circle represents gene number in each pathway.

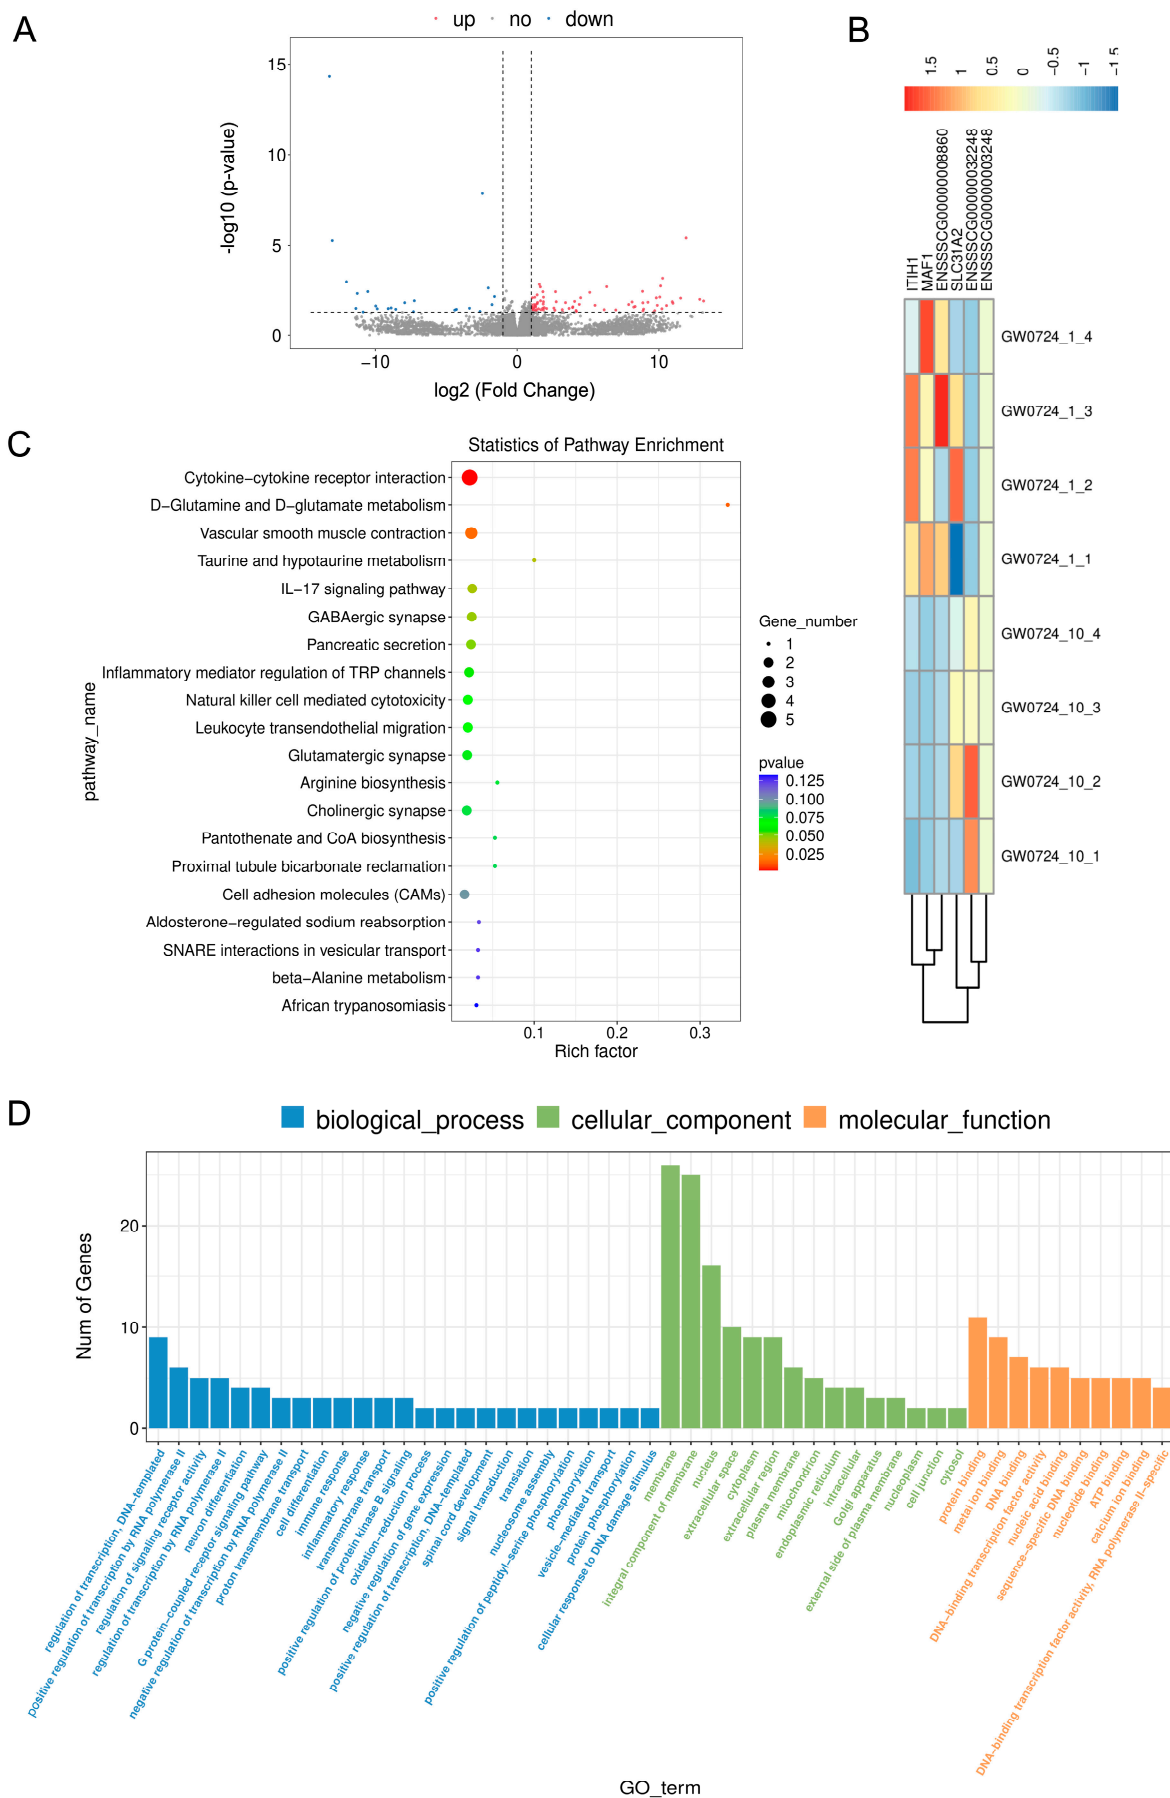

**Figure S2:** Volcano plots describing the abundance of transcript expression profiles between GW0724 at a concentration of 1  $\mu\text{mol/L}$  and GW0724 at a concentration of 10  $\mu\text{mol/L}$  (A); hierarchical clustering heatmap of differentially expressed genes between GW0724 at a concentration of 1  $\mu\text{mol/L}$  and GW0724 at a concentration of 10  $\mu\text{mol/L}$  (B); KEGG analysis of the differentially expressed genes between GW0724 at a concentration of 1  $\mu\text{mol/L}$  and GW0724 at a concentration of 10  $\mu\text{mol/L}$  (C); GO analysis of the differentially expressed genes between GW0724 at a concentration of 1  $\mu\text{mol/L}$  and GW0724 at a concentration of 10  $\mu\text{mol/L}$  (D).

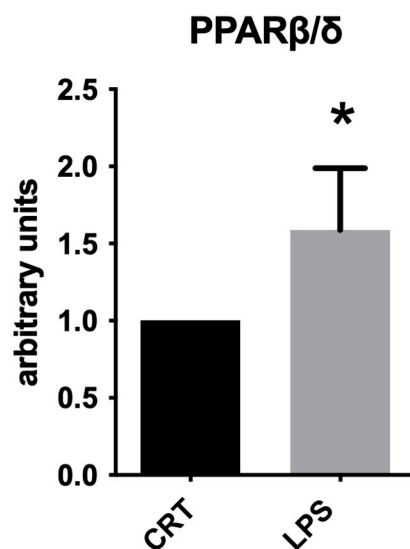

**Figure S3:** Expression of *PPARβ/δ* mRNA in porcine corpus luteum during mid-luteal phase after LPS treatment. Results were considered statistically significant at  $p \leq 0.05$  (\*).

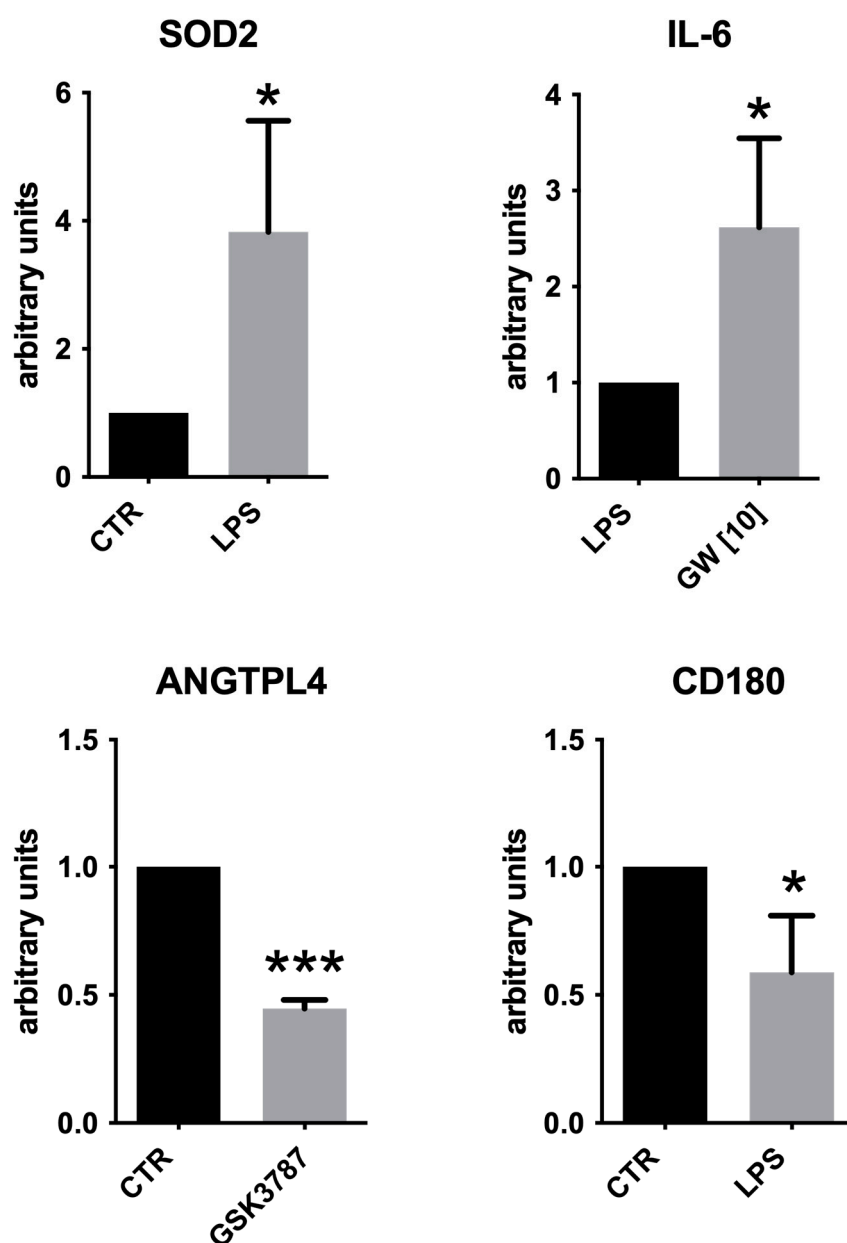

**Figure S4:** Real-time PCR validation of RNA-Seq results for random differentially expressed genes. Results were considered statistically significant at  $p \leq 0.05$  (\*), and  $p \leq 0.001$  (\*\*\*).
