# Supplementary material for: PPARβ/δ Ligands Regulate Oxidative Status and Inflammatory Response in Inflamed Corpus Luteum—An In Vitro Study
Source: Int J Mol Sci. 2023 Mar 5;24(5):4993. doi: 10.3390/ijms24054993 (PMC10003567; doi:10.3390/ijms24054993)
Supplement: Supplementary file 1 [file ijms-24-04993-s001.zip › Supplemental Tables.xlsx]

## Sheet: Supplemental Table S1
Table S1: Primers used in real-time PCR validation of differentially expressed genes
Gene	Forward	Reverse
IL-6	TCTGGGTTCAATCAGGAGACC	ACTAATCTGCACAAGCCTCGAC
SOD2	CTTGCAGATTGCCGCTTGTT	CGGCGTATCGCTCAGTTACA
CD180	CCTAAGCCACAACAGCCTGA	ATTCGAGCAAGTGCAGTCCA
ANGPTL4	TGCCCAGCTCACAATATCA	TAAAGTCCACCGAGCCATCC
PPARBETA/DELTA	CGGAGCTGGGATTAATGGGAAA	GCAGTTCCTGTCAACCTCTTTG
GAPDH	ACATCATCCCTGCTTCTACCG	CCAGTGAGCTTCCCGTTGAG
ACTB	ACATCAAGGAGAAGCTCTGCTACG	GAGGGGCGATGATCTTGATCTTCA

## Sheet: Supplemental Table S2
Table S2: Summary of the sequencing depth and mapping reads according to the porcine reference genome
Sample	Valid reads	Mapped reads	Unique Mapped reads	Multi Mapped reads	PE Mapped reads	Reads map to sense strand	Reads map to antisense strand	Non-splice reads	Splice reads
CTR_1	44434242	42147897(94.85%)	41153763(92.62%)	994134(2.24%)	40860086(91.96%)	20555995(46.26%)	20597768(46.36%)	24385900(54.88%)	16767863(37.74%)
CTR_2	48763704	46534095(95.43%)	45534639(93.38%)	999456(2.05%)	45114646(92.52%)	22799041(46.75%)	22735598(46.62%)	26879148(55.12%)	18655491(38.26%)
CTR_3	47860090	45851844(95.80%)	44862280(93.74%)	989564(2.07%)	44458970(92.89%)	22433688(46.87%)	22428592(46.86%)	28816404(60.21%)	16045876(33.53%)
CTR_4	42439866	40619405(95.71%)	39804088(93.79%)	815317(1.92%)	39443264(92.94%)	19900413(46.89%)	19903675(46.90%)	25036889(58.99%)	14767199(34.80%)
GSK3787_1	51658070	49227508(95.29%)	48077645(93.07%)	1149863(2.23%)	47858818(92.65%)	24014892(46.49%)	24062753(46.58%)	27767887(53.75%)	20309758(39.32%)
GSK3787_2	45555064	43561766(95.62%)	42609547(93.53%)	952219(2.09%)	42245870(92.74%)	21325705(46.81%)	21283842(46.72%)	25142888(55.19%)	17466659(38.34%)
GSK3787_3	47389478	45494237(96.00%)	44544370(94.00%)	949867(2.00%)	44183380(93.23%)	22277421(47.01%)	22266949(46.99%)	28530089(60.20%)	16014281(33.79%)
GSK3787_4	42552096	40773665(95.82%)	39930971(93.84%)	842694(1.98%)	39597400(93.06%)	19970460(46.93%)	19960511(46.91%)	25295243(59.45%)	14635728(34.39%)
GW0724_1_1	49905724	47312889(94.80%)	46182259(92.54%)	1130630(2.27%)	45939946(92.05%)	23068633(46.22%)	23113626(46.31%)	27599554(55.30%)	18582705(37.24%)
GW0724_1_2	46681612	44551597(95.44%)	43538044(93.27%)	1013553(2.17%)	43186844(92.51%)	21798392(46.70%)	21739652(46.57%)	25495707(54.62%)	18042337(38.65%)
GW0724_1_3	47336418	45292585(95.68%)	44309696(93.61%)	982889(2.08%)	43927572(92.80%)	22157536(46.81%)	22152160(46.80%)	28231053(59.64%)	16078643(33.97%)
GW0724_1_4	46102186	44131609(95.73%)	43283287(93.89%)	848322(1.84%)	42838652(92.92%)	21633967(46.93%)	21649320(46.96%)	27585549(59.84%)	15697738(34.05%)
GW0724_10_1	42170022	40132743(95.17%)	39156595(92.85%)	976148(2.31%)	38903990(92.26%)	19564283(46.39%)	19592312(46.46%)	23878116(56.62%)	15278479(36.23%)
GW0724_10_2	47667480	45540107(95.54%)	44559002(93.48%)	981105(2.06%)	44162284(92.65%)	22300182(46.78%)	22258820(46.70%)	26686963(55.99%)	17872039(37.49%)
GW0724_10_3	50334134	48349962(96.06%)	47241303(93.86%)	1108659(2.20%)	46955364(93.29%)	23632230(46.95%)	23609073(46.90%)	30091702(59.78%)	17149601(34.07%)
GW0724_10_4	47907892	45955760(95.93%)	44990871(93.91%)	964889(2.01%)	44677146(93.26%)	22496526(46.96%)	22494345(46.95%)	28072073(58.60%)	16918798(35.32%)
LPS_1	49118662	46892575(95.47%)	45803612(93.25%)	1088963(2.22%)	45527762(92.69%)	22880121(46.58%)	22923491(46.67%)	27574383(56.14%)	18229229(37.11%)
LPS_2	46717134	44685401(95.65%)	43722900(93.59%)	962501(2.06%)	43328468(92.75%)	21885744(46.85%)	21837156(46.74%)	25580457(54.76%)	18142443(38.83%)
LPS_3	48478626	46470339(95.86%)	45490091(93.84%)	980248(2.02%)	45048708(92.92%)	22746215(46.92%)	22743876(46.92%)	29044519(59.91%)	16445572(33.92%)
LPS_4	45648108	43729839(95.80%)	42872395(93.92%)	857444(1.88%)	42438224(92.97%)	21431021(46.95%)	21441374(46.97%)	27430486(60.09%)	15441909(33.83%)

## Sheet: Supplemental Table S3
Table S3: Differentially expressed genes identified in the porcine corpus luteum after LPS treatment
gene_id	gene_name	transcript_id	GO	KEGG	KO_ENTRY	EC	Description	trans_type	fc	log2(fc)	pval	qval	regulation	significant
ENSSSCG00000035421	ATP8A2	ENSSSCT00000063748;ENSSSCT00000054200	GO:0000166(nucleotide binding);GO:0000287(magnesium ion binding);GO:0003011(involuntary skeletal muscle contraction);GO:0004012(phospholipid-translocating ATPase activity);GO:0005524(ATP binding);GO:0005654(nucleoplasm);GO:0005768(endosome);GO:0005794(Golgi apparatus);GO:0005886(plasma membrane);GO:0007409(axonogenesis);GO:0007568(aging);GO:0010842(retina layer formation);GO:0010976(positive regu…	NA	K14802	EC:7.6.2.1	phospholipid-transporting ATPase IB [Source:NCBI gene;Acc:100523747]	protein_coding	0	-8.06	0	0	down	yes
ENSSSCG00000015636	VSTM2A	ENSSSCT00000027722	GO:0003674(molecular_function);GO:0005575(cellular_component);GO:0005576(extracellular region);GO:0008150(biological_process);GO:0010628(positive regulation of gene expression);GO:0010884(positive regulation of lipid storage);GO:0016021(integral component of membrane);GO:0042802(identical protein binding);GO:0070352(positive regulation of white fat cell proliferation);GO:0071773(cellular response…	NA	NA	NA	V-set and transmembrane domain containing 2A [Source:NCBI gene;Acc:100517233]	protein_coding	0	-9.34	0	0	down	yes
ENSSSCG00000035727	SURF1	ENSSSCT00000042555;ENSSSCT00000060206	GO:0004129(cytochrome-c oxidase activity);GO:0005739(mitochondrion);GO:0005743(mitochondrial inner membrane);GO:0006119(oxidative phosphorylation);GO:0016020(membrane);GO:0016021(integral component of membrane);GO:0022900(electron transport chain);GO:0033617(mitochondrial respiratory chain complex IV assembly);GO:1902600(proton transmembrane transport);GO:1902600(proton transmembrane transport)	NA	NA	NA	surfeit locus protein 1 [Source:NCBI gene;Acc:110256505]	protein_coding	0.21	-2.25	0	0.07	down	yes
ENSSSCG00000034746	CAPN8	ENSSSCT00000058078;ENSSSCT00000037864	GO:0004198(calcium-dependent cysteine-type endopeptidase activity);GO:0005509(calcium ion binding);GO:0005622(intracellular);GO:0006508(proteolysis);GO:0007586(digestion);GO:0008233(peptidase activity);GO:0008234(cysteine-type peptidase activity);GO:0016787(hydrolase activity);GO:0016787(hydrolase activity)	NA	K08577	EC:3.4.22.-	calpain 8 [Source:NCBI gene;Acc:100625563]	protein_coding	0	-10.99	0	0.24	down	yes
ENSSSCG00000012101	ENSSSCG00000012101	ENSSSCT00000013235	GO:0005515(protein binding);GO:0005576(extracellular region);GO:0010466(negative regulation of peptidase activity);GO:0030414(peptidase inhibitor activity)	NA	NA	NA	anosmin 1 [Source:NCBI gene;Acc:100154011]	protein_coding	0	-9.82	0	0.39	down	yes
ENSSSCG00000037467	ENSSSCG00000037467	ENSSSCT00000060789	NA	NA	NA	NA		protein_coding	0	-8.85	0	0.45	down	yes
ENSSSCG00000020970	IL6	ENSSSCT00000023544;ENSSSCT00000025647	GO:0001781(neutrophil apoptotic process);GO:0002384(hepatic immune response);GO:0002675(positive regulation of acute inflammatory response);GO:0005125(cytokine activity);GO:0005138(interleukin-6 receptor binding);GO:0005576(extracellular region);GO:0005615(extracellular space);GO:0005896(interleukin-6 receptor complex);GO:0006954(inflammatory response);GO:0006955(immune response);GO:0008083(growt…	01521(EGFR tyrosine kinase inhibitor resistance);01523(Antifolate resistance);04060(Cytokine-cytokine receptor interaction);04066(HIF-1 signaling pathway);04068(FoxO signaling pathway);04151(PI3K-Akt signaling pathway);04218(Cellular senescence);04620(Toll-like receptor signaling pathway);04621(NOD-like receptor signaling pathway);04623(Cytosolic DNA-sensing pathway);04625(C-type lectin receptor …	K05405	NA	interleukin 6 [Source:NCBI gene;Acc:399500]	protein_coding	0.37	-1.44	0	0.86	down	yes
ENSSSCG00000006172	PI15	ENSSSCT00000061958;ENSSSCT00000006766	GO:0005576(extracellular region);GO:0005615(extracellular space);GO:0005615(extracellular space)	NA	NA	NA	peptidase inhibitor 15 [Source:NCBI gene;Acc:100158209]	protein_coding	0.27	-1.87	0	1	down	yes
ENSSSCG00000004340	FHL5	ENSSSCT00000004796	GO:0003713(transcription coactivator activity);GO:0005634(nucleus);GO:0030018(Z disc);GO:0045944(positive regulation of transcription by RNA polymerase II);GO:0046872(metal ion binding)	NA	NA	NA	four and a half LIM domains 5 [Source:NCBI gene;Acc:100152075]	protein_coding	0.36	-1.48	0	1	down	yes
ENSSSCG00000017980	ALOX12B	ENSSSCT00000019565	GO:0003824(catalytic activity);GO:0004052(arachidonate 12-lipoxygenase activity);GO:0005506(iron ion binding);GO:0005515(protein binding);GO:0006497(protein lipidation);GO:0006665(sphingolipid metabolic process);GO:0010628(positive regulation of gene expression);GO:0016491(oxidoreductase activity);GO:0016702(oxidoreductase activity, acting on single donors with incorporation of molecular oxygen, …	NA	NA	NA	arachidonate 12-lipoxygenase, 12R type [Source:NCBI gene;Acc:100526246]	protein_coding	0.05	-4.39	0	1	down	yes
ENSSSCG00000034163	PLN	ENSSSCT00000055657	GO:0002026(regulation of the force of heart contraction);GO:0005246(calcium channel regulator activity);GO:0005739(mitochondrion);GO:0005783(endoplasmic reticulum);GO:0005789(endoplasmic reticulum membrane);GO:0006816(calcium ion transport);GO:0006874(cellular calcium ion homeostasis);GO:0007219(Notch signaling pathway);GO:0008016(regulation of heart contraction);GO:0010459(negative regulation of…	04020(Calcium signaling pathway);04022(cGMP-PKG signaling pathway);04024(cAMP signaling pathway);04261(Adrenergic signaling in cardiomyocytes);04919(Thyroid hormone signaling pathway);05414(Dilated cardiomyopathy (DCM))	K05852	NA	phospholamban [Source:NCBI gene;Acc:397421]	protein_coding	0.3	-1.73	0	1	down	yes
ENSSSCG00000037684	PDYN	ENSSSCT00000066335	GO:0001515(opioid peptide activity);GO:0005576(extracellular region);GO:0005886(plasma membrane);GO:0007218(neuropeptide signaling pathway);GO:0010469(regulation of signaling receptor activity)	04080(Neuroactive ligand-receptor interaction);05030(Cocaine addiction);05031(Amphetamine addiction);05034(Alcoholism)	K15840	NA	prodynorphin [Source:NCBI gene;Acc:445529]	protein_coding	0.24	-2.03	0	1	down	yes
ENSSSCG00000002927	LRFN3	ENSSSCT00000003233	GO:0005515(protein binding);GO:0009986(cell surface);GO:0016020(membrane);GO:0016021(integral component of membrane)	NA	K16356	NA	leucine rich repeat and fibronectin type III domain containing 3 [Source:NCBI gene;Acc:100738610]	protein_coding	0	-10.14	0	1	down	yes
ENSSSCG00000005214	INSL6	ENSSSCT00000005747	GO:0005179(hormone activity);GO:0005576(extracellular region);GO:0010469(regulation of signaling receptor activity)	NA	K05255	NA	insulin like 6 [Source:NCBI gene;Acc:100158105]	protein_coding	0	-11.12	0.01	1	down	yes
ENSSSCG00000001401	ENSSSCG00000001401	ENSSSCT00000035387	GO:0006811(ion transport);GO:0008553(proton-exporting ATPase activity, phosphorylative mechanism);GO:0016471(vacuolar proton-transporting V-type ATPase complex);GO:0016887(ATPase activity);GO:0030285(integral component of synaptic vesicle membrane);GO:0042470(melanosome);GO:0042626(ATPase activity, coupled to transmembrane movement of substances);GO:1902600(proton transmembrane transport)	00190(Oxidative phosphorylation);04145(Phagosome);04150(mTOR signaling pathway);04721(Synaptic vesicle cycle);04966(Collecting duct acid secretion);05165(Human papillomavirus infection);05323(Rheumatoid arthritis)	K02152	NA	ATPase H+ transporting V1 subunit G2 [Source:NCBI gene;Acc:100152358]	protein_coding	0.31	-1.68	0.01	1	down	yes
ENSSSCG00000009842	CCDC60	ENSSSCT00000055791;ENSSSCT00000010786;ENSSSCT00000048215	GO:0016020(membrane);GO:0016021(integral component of membrane);GO:0016021(integral component of membrane)	NA	NA	NA	coiled-coil domain containing 60 [Source:NCBI gene;Acc:110255219]	protein_coding	0.17	-2.53	0.01	1	down	yes
ENSSSCG00000001872	LINGO1	ENSSSCT00000054117;ENSSSCT00000002097	GO:0005154(epidermal growth factor receptor binding);GO:0005515(protein binding);GO:0005615(extracellular space);GO:0016020(membrane);GO:0016021(integral component of membrane);GO:0031012(extracellular matrix);GO:0031012(extracellular matrix)	NA	NA	NA	leucine rich repeat and Ig domain containing 1 [Source:NCBI gene;Acc:100155465]	protein_coding	0.34	-1.56	0.01	1	down	yes
ENSSSCG00000010325	KCNMA1	ENSSSCT00000058903;ENSSSCT00000054031;ENSSSCT00000056413	GO:0001666(response to hypoxia);GO:0003779(actin binding);GO:0005216(ion channel activity);GO:0005244(voltage-gated ion channel activity);GO:0005249(voltage-gated potassium channel activity);GO:0005267(potassium channel activity);GO:0005515(protein binding);GO:0005886(plasma membrane);GO:0005901(caveola);GO:0006811(ion transport);GO:0006813(potassium ion transport);GO:0006970(response to osmotic …	04022(cGMP-PKG signaling pathway);04270(Vascular smooth muscle contraction);04911(Insulin secretion);04924(Renin secretion);04970(Salivary secretion);04972(Pancreatic secretion);04972(Pancreatic secretion)	K04936	NA	potassium calcium-activated channel subfamily M alpha 1 [Source:NCBI gene;Acc:397434]	protein_coding	0.27	-1.89	0.01	1	down	yes
ENSSSCG00000026754	ATCAY	ENSSSCT00000025899	GO:0004309(exopolyphosphatase activity);GO:0005737(cytoplasm);GO:0006798(polyphosphate catabolic process);GO:0006915(apoptotic process);GO:0016020(membrane);GO:0016021(integral component of membrane);GO:0019894(kinesin binding);GO:0031175(neuron projection development);GO:0031966(mitochondrial membrane);GO:0032880(regulation of protein localization);GO:0043005(neuron projection);GO:2000212(negati…	NA	K18450	NA	ATCAY, caytaxin [Source:NCBI gene;Acc:100626830]	protein_coding	0	-8.43	0.01	1	down	yes
ENSSSCG00000030681	MYBPH	ENSSSCT00000026029	GO:0005515(protein binding)	NA	NA	NA	myosin binding protein H [Source:NCBI gene;Acc:613132]	protein_coding	0.15	-2.79	0.01	1	down	yes
ENSSSCG00000038602	ENSSSCG00000038602	ENSSSCT00000061940;ENSSSCT00000004658	GO:0005615(extracellular space);GO:0010506(regulation of autophagy);GO:0016020(membrane);GO:0016021(integral component of membrane);GO:0016021(integral component of membrane)	NA	NA	NA	SOGA family member 3 [Source:NCBI gene;Acc:100512321]	protein_coding	0.21	-2.22	0.01	1	down	yes
ENSSSCG00000032113	ENSSSCG00000032113	ENSSSCT00000055598;ENSSSCT00000060045	GO:0000064(L-ornithine transmembrane transporter activity);GO:0006865(amino acid transport);GO:0015181(arginine transmembrane transporter activity);GO:0015189(L-lysine transmembrane transporter activity);GO:0016020(membrane);GO:0016021(integral component of membrane);GO:0022857(transmembrane transporter activity);GO:0055085(transmembrane transport);GO:0097638(L-arginine import across plasma membr…	NA	NA	NA	cationic amino acid transporter 3-like [Source:NCBI gene;Acc:100523440]	protein_coding	0.01	-6.77	0.01	1	down	yes
ENSSSCG00000040683	ENSSSCG00000040683	ENSSSCT00000060407	GO:0000166(nucleotide binding);GO:0003924(GTPase activity);GO:0005525(GTP binding);GO:0005634(nucleus);GO:0006913(nucleocytoplasmic transport);GO:0015031(protein transport)	NA	NA	NA		protein_coding	0	-11.18	0.01	1	down	yes
ENSSSCG00000029077	TUBAL3	ENSSSCT00000031213	GO:0000166(nucleotide binding);GO:0003924(GTPase activity);GO:0005200(structural constituent of cytoskeleton);GO:0005525(GTP binding);GO:0005737(cytoplasm);GO:0005856(cytoskeleton);GO:0005874(microtubule);GO:0007010(cytoskeleton organization);GO:0007017(microtubule-based process)	04145(Phagosome);04210(Apoptosis);04530(Tight junction);04540(Gap junction)	K07374	NA	tubulin alpha like 3 [Source:NCBI gene;Acc:100623355]	protein_coding	0.3	-1.75	0.02	1	down	yes
ENSSSCG00000013754	CACNA1A	ENSSSCT00000037191;ENSSSCT00000042437;ENSSSCT00000015028	GO:0001505(regulation of neurotransmitter levels);GO:0005216(ion channel activity);GO:0005244(voltage-gated ion channel activity);GO:0005245(voltage-gated calcium channel activity);GO:0005262(calcium channel activity);GO:0005891(voltage-gated calcium channel complex);GO:0006811(ion transport);GO:0006816(calcium ion transport);GO:0007204(positive regulation of cytosolic calcium ion concentration);…	04010(MAPK signaling pathway);04020(Calcium signaling pathway);04721(Synaptic vesicle cycle);04723(Retrograde endocannabinoid signaling);04724(Glutamatergic synapse);04725(Cholinergic synapse);04726(Serotonergic synapse);04727(GABAergic synapse);04728(Dopaminergic synapse);04730(Long-term depression);04742(Taste transduction);04930(Type II diabetes mellitus);05032(Morphine addiction);05033(Nicoti…	K04344	NA	calcium voltage-gated channel subunit alpha1 A [Source:NCBI gene;Acc:100525387]	protein_coding	0.35	-1.51	0.02	1	down	yes
ENSSSCG00000012137	BMX	ENSSSCT00000013276;ENSSSCT00000032899	GO:0000166(nucleotide binding);GO:0002250(adaptive immune response);GO:0004672(protein kinase activity);GO:0004713(protein tyrosine kinase activity);GO:0004715(non-membrane spanning protein tyrosine kinase activity);GO:0005524(ATP binding);GO:0005654(nucleoplasm);GO:0005886(plasma membrane);GO:0006468(protein phosphorylation);GO:0007165(signal transduction);GO:0016301(kinase activity);GO:0016310(…	NA	K08896	EC:2.7.10.2	BMX non-receptor tyrosine kinase [Source:NCBI gene;Acc:100516528]	protein_coding	0.45	-1.16	0.02	1	down	yes
ENSSSCG00000036943	C11orf87	ENSSSCT00000062111	GO:0016020(membrane);GO:0016021(integral component of membrane)	NA	NA	NA	chromosome 9 C11orf87 homolog [Source:NCBI gene;Acc:100511522]	protein_coding	0.38	-1.38	0.02	1	down	yes
ENSSSCG00000017344	FAM187A	ENSSSCT00000018880	GO:0016020(membrane);GO:0016021(integral component of membrane)	NA	NA	NA	Ig-like V-type domain-containing protein FAM187A [Source:NCBI gene;Acc:102165039]	protein_coding	0.34	-1.57	0.02	1	down	yes
ENSSSCG00000003386	TNFRSF9	ENSSSCT00000035166;ENSSSCT00000003757	GO:0005515(protein binding);GO:0005886(plasma membrane);GO:0006915(apoptotic process);GO:0008285(negative regulation of cell population proliferation);GO:0009897(external side of plasma membrane);GO:0016020(membrane);GO:0016021(integral component of membrane);GO:0038023(signaling receptor activity);GO:0042127(regulation of cell population proliferation);GO:0042127(regulation of cell population pr…	04060(Cytokine-cytokine receptor interaction);04060(Cytokine-cytokine receptor interaction)	K05146	NA	TNF receptor superfamily member 9 [Source:NCBI gene;Acc:100519368]	protein_coding	0.47	-1.1	0.02	1	down	yes
ENSSSCG00000010009	GAL3ST1	ENSSSCT00000040361;ENSSSCT00000010966;ENSSSCT00000047446	GO:0001733(galactosylceramide sulfotransferase activity);GO:0005794(Golgi apparatus);GO:0006682(galactosylceramide biosynthetic process);GO:0007283(spermatogenesis);GO:0009247(glycolipid biosynthetic process);GO:0016021(integral component of membrane);GO:0042552(myelination);GO:0042552(myelination)	00565(Ether lipid metabolism);00600(Sphingolipid metabolism);00600(Sphingolipid metabolism)	K01019	EC:2.8.2.11	galactose-3-O-sulfotransferase 1 [Source:NCBI gene;Acc:100155265]	protein_coding	0.43	-1.22	0.02	1	down	yes
ENSSSCG00000039358	SUSD5	ENSSSCT00000037860	GO:0005540(hyaluronic acid binding);GO:0007155(cell adhesion);GO:0007219(Notch signaling pathway);GO:0016020(membrane);GO:0016021(integral component of membrane)	NA	NA	NA	sushi domain containing 5 [Source:NCBI gene;Acc:110256562]	protein_coding	0.41	-1.27	0.02	1	down	yes
ENSSSCG00000023921	VSTM2B	ENSSSCT00000025639	GO:0016021(integral component of membrane)	NA	NA	NA	V-set and transmembrane domain containing 2B [Source:NCBI gene;Acc:100627408]	protein_coding	0	-8.43	0.02	1	down	yes
ENSSSCG00000011110	CCDC3	ENSSSCT00000012159	GO:0005576(extracellular region);GO:0005783(endoplasmic reticulum);GO:0010804(negative regulation of tumor necrosis factor-mediated signaling pathway);GO:0045600(positive regulation of fat cell differentiation);GO:0046889(positive regulation of lipid biosynthetic process)	NA	NA	NA	coiled-coil domain-containing protein 3 [Source:NCBI gene;Acc:100510975]	protein_coding	0.34	-1.57	0.02	1	down	yes
ENSSSCG00000030371	ENSSSCG00000030371	ENSSSCT00000002760;ENSSSCT00000002764;ENSSSCT00000044717;ENSSSCT00000062721	GO:0004867(serine-type endopeptidase inhibitor activity);GO:0005615(extracellular space);GO:0010951(negative regulation of endopeptidase activity);GO:0010951(negative regulation of endopeptidase activity)	NA	K04525	NA	serpin A3-8 [Source:NCBI gene;Acc:396685]	protein_coding	0	-9.34	0.02	1	down	yes
ENSSSCG00000029651	SLN	ENSSSCT00000030356	GO:0016020(membrane);GO:0016021(integral component of membrane);GO:0016529(sarcoplasmic reticulum);GO:0030234(enzyme regulator activity);GO:0050790(regulation of catalytic activity);GO:0051924(regulation of calcium ion transport)	NA	K22642	NA	sarcolipin [Source:NCBI gene;Acc:733627]	protein_coding	0.2	-2.34	0.02	1	down	yes
ENSSSCG00000003191	TSKS	ENSSSCT00000003546	GO:0005814(centriole);GO:0010923(negative regulation of phosphatase activity);GO:0019901(protein kinase binding)	NA	K16492	NA	testis specific serine kinase substrate [Source:NCBI gene;Acc:100522079]	protein_coding	0	-9.21	0.03	1	down	yes
ENSSSCG00000026349	ALDH3B2	ENSSSCT00000014101	GO:0004028(3-chloroallyl aldehyde dehydrogenase activity);GO:0006081(cellular aldehyde metabolic process);GO:0016491(oxidoreductase activity);GO:0016620(oxidoreductase activity, acting on the aldehyde or oxo group of donors, NAD or NADP as acceptor);GO:0055114(oxidation-reduction process)	00010(Glycolysis / Gluconeogenesis);00340(Histidine metabolism);00350(Tyrosine metabolism);00360(Phenylalanine metabolism);00410(beta-Alanine metabolism);00980(Metabolism of xenobiotics by cytochrome P450);00982(Drug metabolism - cytochrome P450);05204(Chemical carcinogenesis)	K00129	EC:1.2.1.5	aldehyde dehydrogenase family 3 member B2-like [Source:NCBI gene;Acc:100522421]	protein_coding	0	-10.09	0.03	1	down	yes
ENSSSCG00000017583	SGCA	ENSSSCT00000046528;ENSSSCT00000019141	GO:0005509(calcium ion binding);GO:0005886(plasma membrane);GO:0005911(cell-cell junction);GO:0016011(dystroglycan complex);GO:0016012(sarcoglycan complex);GO:0016020(membrane);GO:0016021(integral component of membrane);GO:0042383(sarcolemma);GO:0045121(membrane raft);GO:0045121(membrane raft)	05410(Hypertrophic cardiomyopathy (HCM));05412(Arrhythmogenic right ventricular cardiomyopathy (ARVC));05414(Dilated cardiomyopathy (DCM));05416(Viral myocarditis);05416(Viral myocarditis)	K12565	NA	sarcoglycan alpha [Source:NCBI gene;Acc:100240723]	protein_coding	0.04	-4.6	0.03	1	down	yes
ENSSSCG00000008294	ACTG2	ENSSSCT00000052319;ENSSSCT00000009083;ENSSSCT00000064546	GO:0000166(nucleotide binding);GO:0005524(ATP binding);GO:0071944(cell periphery);GO:0071944(cell periphery)	04270(Vascular smooth muscle contraction);04270(Vascular smooth muscle contraction)	K12315	NA	actin, gamma 2, smooth muscle, enteric [Source:NCBI gene;Acc:100520667]	protein_coding	0.41	-1.3	0.03	1	down	yes
ENSSSCG00000015073	TAGLN	ENSSSCT00000016439;ENSSSCT00000055649;ENSSSCT00000042087;ENSSSCT00000043435	GO:0005515(protein binding);GO:0030855(epithelial cell differentiation);GO:0051015(actin filament binding);GO:0051015(actin filament binding)	NA	K20526	NA	transgelin [Source:NCBI gene;Acc:397021]	protein_coding	0.41	-1.29	0.03	1	down	yes
ENSSSCG00000013614	CNN1	ENSSSCT00000014869;ENSSSCT00000039326;ENSSSCT00000062396;ENSSSCT00000042258	GO:0003779(actin binding);GO:0005515(protein binding);GO:0005516(calmodulin binding);GO:0005856(cytoskeleton);GO:0031032(actomyosin structure organization);GO:1904706(negative regulation of vascular smooth muscle cell proliferation);GO:1904706(negative regulation of vascular smooth muscle cell proliferation)	NA	NA	NA	calponin 1 [Source:NCBI gene;Acc:396911]	protein_coding	0.3	-1.76	0.03	1	down	yes
ENSSSCG00000014561	NLRP6	ENSSSCT00000040835;ENSSSCT00000015911	GO:0000166(nucleotide binding);GO:0002862(negative regulation of inflammatory response to antigenic stimulus);GO:0005524(ATP binding);GO:0009617(response to bacterium);GO:0010506(regulation of autophagy);GO:0034122(negative regulation of toll-like receptor signaling pathway);GO:0042060(wound healing);GO:0043124(negative regulation of I-kappaB kinase/NF-kappaB signaling);GO:0043409(negative regula…	04621(NOD-like receptor signaling pathway);04621(NOD-like receptor signaling pathway)	K20863	NA	NLR family pyrin domain containing 6 [Source:NCBI gene;Acc:100519245]	protein_coding	0.28	-1.85	0.03	1	down	yes
ENSSSCG00000032521	ENSSSCG00000032521	ENSSSCT00000043086;ENSSSCT00000058407	GO:0005515(protein binding);GO:0005576(extracellular region);GO:0007275(multicellular organism development);GO:0016055(Wnt signaling pathway);GO:0016055(Wnt signaling pathway)	NA	NA	NA		protein_coding	0.17	-2.54	0.03	1	down	yes
ENSSSCG00000004540	ONECUT2	ENSSSCT00000005015	GO:0000978(RNA polymerase II proximal promoter sequence-specific DNA binding);GO:0001228(DNA-binding transcription activator activity, RNA polymerase II-specific);GO:0001889(liver development);GO:0001952(regulation of cell-matrix adhesion);GO:0002064(epithelial cell development);GO:0003677(DNA binding);GO:0003700(DNA-binding transcription factor activity);GO:0005634(nucleus);GO:0005654(nucleoplas…	NA	NA	NA	one cut homeobox 2 [Source:NCBI gene;Acc:106507181]	protein_coding	0	-7.82	0.04	1	down	yes
ENSSSCG00000005360	IGFBPL1	ENSSSCT00000005900	GO:0001558(regulation of cell growth);GO:0005515(protein binding);GO:0005520(insulin-like growth factor binding);GO:0005576(extracellular region);GO:0005615(extracellular space);GO:0071228(cellular response to tumor cell)	NA	NA	NA	insulin like growth factor binding protein like 1 [Source:NCBI gene;Acc:100155070]	protein_coding	0	-7.72	0.04	1	down	yes
ENSSSCG00000021383	CGAS	ENSSSCT00000030573	GO:0000166(nucleotide binding);GO:0002218(activation of innate immune response);GO:0002230(positive regulation of defense response to virus by host);GO:0002376(immune system process);GO:0002637(regulation of immunoglobulin production);GO:0003677(DNA binding);GO:0003682(chromatin binding);GO:0003690(double-stranded DNA binding);GO:0005524(ATP binding);GO:0005525(GTP binding);GO:0005634(nucleus);GO…	04623(Cytosolic DNA-sensing pathway);05163(Human cytomegalovirus infection);05168(Herpes simplex virus 1 infection);05170(Human immunodeficiency virus 1 infection)	K17834	EC:2.7.7.86	cyclic GMP-AMP synthase [Source:NCBI gene;Acc:100516408]	protein_coding	0.27	-1.91	0.04	1	down	yes
ENSSSCG00000036741	ENSSSCG00000036741	ENSSSCT00000040101	GO:0003677(DNA binding);GO:0003700(DNA-binding transcription factor activity);GO:0005634(nucleus);GO:0006355(regulation of transcription, DNA-templated);GO:0007275(multicellular organism development);GO:0043565(sequence-specific DNA binding)	NA	K09356	NA	paired like homeodomain 1 [Source:NCBI gene;Acc:100689266]	protein_coding	0.05	-4.3	0.04	1	down	yes
ENSSSCG00000037457	HSPB7	ENSSSCT00000046359	GO:0005654(nucleoplasm);GO:0007507(heart development);GO:0015629(actin cytoskeleton);GO:0016235(aggresome);GO:0031005(filamin binding)	NA	K09546	NA	heat shock protein family B (small) member 7 [Source:NCBI gene;Acc:100627988]	protein_coding	0.15	-2.71	0.04	1	down	yes
ENSSSCG00000013865	NWD1	ENSSSCT00000015145	GO:0005515(protein binding);GO:0005829(cytosol);GO:0010628(positive regulation of gene expression);GO:0032088(negative regulation of NF-kappaB transcription factor activity)	NA	NA	NA	NACHT and WD repeat domain containing 1 [Source:NCBI gene;Acc:100737957]	protein_coding	0.01	-7.14	0.04	1	down	yes
ENSSSCG00000037879	ENSSSCG00000037879	ENSSSCT00000063004	GO:0005615(extracellular space);GO:0007157(heterophilic cell-cell adhesion via plasma membrane cell adhesion molecules);GO:0030246(carbohydrate binding)	NA	K10092	NA	galectin 7 [Source:NCBI gene;Acc:100217394]	protein_coding	0	-10.17	0.04	1	down	yes
ENSSSCG00000023924	PDE1A	ENSSSCT00000057525;ENSSSCT00000024180	GO:0004114(3',5'-cyclic-nucleotide phosphodiesterase activity);GO:0007165(signal transduction);GO:0008081(phosphoric diester hydrolase activity);GO:0016787(hydrolase activity);GO:0043025(neuronal cell body);GO:0046872(metal ion binding);GO:0048101(calcium- and calmodulin-regulated 3',5'-cyclic-GMP phosphodiesterase activity);GO:0048101(calcium- and calmodulin-regulated 3',5'-cyclic-GMP phosphodie…	00230(Purine metabolism);04020(Calcium signaling pathway);04740(Olfactory transduction);04742(Taste transduction);04924(Renin secretion);05032(Morphine addiction);05032(Morphine addiction)	K13755	EC:3.1.4.17	phosphodiesterase 1A [Source:NCBI gene;Acc:100152819]	protein_coding	0.4	-1.33	0.04	1	down	yes
ENSSSCG00000001636	GUCA1A	ENSSSCT00000040774	GO:0001750(photoreceptor outer segment);GO:0005509(calcium ion binding);GO:0007601(visual perception);GO:0007602(phototransduction);GO:0008048(calcium sensitive guanylate cyclase activator activity);GO:0030249(guanylate cyclase regulator activity);GO:0031282(regulation of guanylate cyclase activity);GO:0031284(positive regulation of guanylate cyclase activity)	04744(Phototransduction)	K08328	NA	guanylate cyclase activator 1A [Source:NCBI gene;Acc:100739200]	protein_coding	0.46	-1.13	0.04	1	down	yes
ENSSSCG00000036007	MFAP4	ENSSSCT00000041663	GO:0001527(microfibril);GO:0005576(extracellular region);GO:0009650(UV protection);GO:0010712(regulation of collagen metabolic process);GO:0048251(elastic fiber assembly);GO:0062023(collagen-containing extracellular matrix);GO:0071493(cellular response to UV-B);GO:0071953(elastic fiber);GO:0097435(supramolecular fiber organization)	NA	NA	NA	microfibril associated protein 4 [Source:NCBI gene;Acc:110256120]	protein_coding	0.16	-2.63	0.04	1	down	yes
ENSSSCG00000004072	IPCEF1	ENSSSCT00000056688;ENSSSCT00000004501	NA	NA	NA	NA	interaction protein for cytohesin exchange factors 1 [Source:NCBI gene;Acc:100737172]	protein_coding	0.09	-3.41	0.04	1	down	yes
ENSSSCG00000036403	FAM180A	ENSSSCT00000061939	NA	NA	NA	NA	family with sequence similarity 180 member A [Source:NCBI gene;Acc:100737678]	protein_coding	0.39	-1.34	0.04	1	down	yes
ENSSSCG00000039721	PRL	ENSSSCT00000066158	GO:0001937(negative regulation of endothelial cell proliferation);GO:0005179(hormone activity);GO:0005576(extracellular region);GO:0010469(regulation of signaling receptor activity);GO:0040014(regulation of multicellular organism growth);GO:0046427(positive regulation of receptor signaling pathway via JAK-STAT);GO:1902895(positive regulation of pri-miRNA transcription by RNA polymerase II)	04060(Cytokine-cytokine receptor interaction);04080(Neuroactive ligand-receptor interaction);04151(PI3K-Akt signaling pathway);04630(Jak-STAT signaling pathway);04917(Prolactin signaling pathway)	K05439	NA	prolactin [Source:NCBI gene;Acc:396965]	protein_coding	0	-8.19	0.04	1	down	yes
ENSSSCG00000011069	ARMC4	ENSSSCT00000064730	GO:0003341(cilium movement);GO:0003356(regulation of cilium beat frequency);GO:0005515(protein binding);GO:0005930(axoneme);GO:0007368(determination of left/right symmetry);GO:0036158(outer dynein arm assembly);GO:0097546(ciliary base)	NA	NA	NA	armadillo repeat containing 4 [Source:NCBI gene;Acc:100516925]	protein_coding	0.16	-2.65	0.04	1	down	yes
ENSSSCG00000005452	C9orf152	ENSSSCT00000005997	NA	NA	NA	NA	chromosome 1 C9orf152 homolog [Source:NCBI gene;Acc:100512390]	protein_coding	0.34	-1.57	0.05	1	down	yes
ENSSSCG00000037812	ENSSSCG00000037812	ENSSSCT00000050315	NA	NA	NA	NA		protein_coding	0.25	-1.99	0.05	1	down	yes
ENSSSCG00000022384	ENSSSCG00000022384	ENSSSCT00000024012	NA	NA	NA	NA	putative MAGE domain-containing protein MAGEA13P [Source:NCBI gene;Acc:102157658]	protein_coding	0.49	-1.02	0.05	1	down	yes
ENSSSCG00000024492	EPHB1	ENSSSCT00000027070	GO:0000166(nucleotide binding);GO:0001525(angiogenesis);GO:0004672(protein kinase activity);GO:0004713(protein tyrosine kinase activity);GO:0004714(transmembrane receptor protein tyrosine kinase activity);GO:0005003(ephrin receptor activity);GO:0005005(transmembrane-ephrin receptor activity);GO:0005515(protein binding);GO:0005524(ATP binding);GO:0005737(cytoplasm);GO:0005783(endoplasmic reticulum…	04360(Axon guidance)	K05110	EC:2.7.10.1	EPH receptor B1 [Source:NCBI gene;Acc:100524585]	protein_coding	0.42	-1.24	0.05	1	down	yes
ENSSSCG00000027768	SLC29A4	ENSSSCT00000025333	GO:0005337(nucleoside transmembrane transporter activity);GO:0005886(plasma membrane);GO:0008504(monoamine transmembrane transporter activity);GO:0015844(monoamine transport);GO:0016020(membrane);GO:0016021(integral component of membrane);GO:0055085(transmembrane transport);GO:1901642(nucleoside transmembrane transport)	NA	K03323	NA	solute carrier family 29 member 4 [Source:NCBI gene;Acc:100624843]	protein_coding	0.22	-2.2	0.05	1	down	yes
ENSSSCG00000025681	ENSSSCG00000025681	ENSSSCT00000029457	GO:0005548(phospholipid transporter activity);GO:0008289(lipid binding);GO:0008525(phosphatidylcholine transporter activity);GO:0015914(phospholipid transport);GO:0031210(phosphatidylcholine binding)	NA	NA	NA	phosphatidylcholine transfer protein [Source:NCBI gene;Acc:100621260]	protein_coding	0.06	-4.13	0.05	1	down	yes
ENSSSCG00000039803	ENSSSCG00000039803	ENSSSCT00000040469	GO:0046983(protein dimerization activity)	NA	NA	NA		protein_coding	######	14.11	0	0	up	yes
ENSSSCG00000015205	HEPACAM	ENSSSCT00000016571	GO:0005911(cell-cell junction);GO:0016020(membrane);GO:0016021(integral component of membrane);GO:0030424(axon);GO:0034613(cellular protein localization)	NA	K23116	NA	hepatic and glial cell adhesion molecule [Source:NCBI gene;Acc:100523198]	protein_coding	######	10.47	0	0	up	yes
ENSSSCG00000011735	SI	ENSSSCT00000039663	GO:0003824(catalytic activity);GO:0004553(hydrolase activity, hydrolyzing O-glycosyl compounds);GO:0005975(carbohydrate metabolic process);GO:0016020(membrane);GO:0016021(integral component of membrane);GO:0030246(carbohydrate binding)	00052(Galactose metabolism);00500(Starch and sucrose metabolism);04973(Carbohydrate digestion and absorption)	K01203	3.2.1.10;EC:3.2.1.48	sucrase-isomaltase [Source:NCBI gene;Acc:100623884]	protein_coding	315.91	8.3	0	0	up	yes
ENSSSCG00000005665	PHYHD1	ENSSSCT00000006228	NA	NA	NA	NA	phytanoyl-CoA dioxygenase domain containing 1 [Source:NCBI gene;Acc:110255203]	protein_coding	625.19	9.29	0	0	up	yes
ENSSSCG00000008522	XDH	ENSSSCT00000009326;ENSSSCT00000045303	GO:0001933(negative regulation of protein phosphorylation);GO:0001937(negative regulation of endothelial cell proliferation);GO:0004854(xanthine dehydrogenase activity);GO:0004855(xanthine oxidase activity);GO:0005506(iron ion binding);GO:0005615(extracellular space);GO:0005829(cytosol);GO:0006919(activation of cysteine-type endopeptidase activity involved in apoptotic process);GO:0007595(lactati…	00230(Purine metabolism);00232(Caffeine metabolism);00983(Drug metabolism - other enzymes);04146(Peroxisome);04146(Peroxisome)	K00106	1.17.3.2;EC:1.17.1.4	xanthine dehydrogenase [Source:NCBI gene;Acc:100515259]	protein_coding	5.49	2.46	0	0	up	yes
ENSSSCG00000036156	RBM12	ENSSSCT00000028045	GO:0003676(nucleic acid binding);GO:0003723(RNA binding);GO:0005654(nucleoplasm)	NA	NA	NA	RNA binding motif protein 12 [Source:NCBI gene;Acc:100157350]	protein_coding	######	15.83	0	0.04	up	yes
ENSSSCG00000027654	NETO1	ENSSSCT00000051530	GO:0005515(protein binding);GO:0007613(memory);GO:0008542(visual learning);GO:0014069(postsynaptic density);GO:0016020(membrane);GO:0016021(integral component of membrane);GO:0035255(ionotropic glutamate receptor binding);GO:0045202(synapse);GO:0048168(regulation of neuronal synaptic plasticity);GO:0048169(regulation of long-term neuronal synaptic plasticity);GO:0060076(excitatory synapse);GO:009…	NA	NA	NA	neuropilin and tolloid like 1 [Source:NCBI gene;Acc:100622872]	protein_coding	367.36	8.52	0	0.85	up	yes
ENSSSCG00000022961	CLMP	ENSSSCT00000025556	GO:0005881(cytoplasmic microtubule);GO:0005923(bicellular tight junction);GO:0016020(membrane);GO:0016021(integral component of membrane);GO:0048565(digestive tract development)	NA	K06789	NA	CXADR like membrane protein [Source:NCBI gene;Acc:100512427]	protein_coding	2.21	1.14	0	1	up	yes
ENSSSCG00000008994	RBM46	ENSSSCT00000040938	GO:0001829(trophectodermal cell differentiation);GO:0003676(nucleic acid binding);GO:0003723(RNA binding);GO:0003729(mRNA binding);GO:0005634(nucleus);GO:0048255(mRNA stabilization)	NA	NA	NA	RNA binding motif protein 46 [Source:NCBI gene;Acc:100513804]	protein_coding	2.3	1.2	0	1	up	yes
ENSSSCG00000007728	ENSSSCG00000007728	ENSSSCT00000008473	GO:0005794(Golgi apparatus);GO:0016020(membrane);GO:0016021(integral component of membrane)	NA	NA	NA		protein_coding	######	11.26	0	1	up	yes
ENSSSCG00000037432	PLPPR3	ENSSSCT00000046977;ENSSSCT00000058842	GO:0016020(membrane);GO:0016021(integral component of membrane);GO:0016021(integral component of membrane)	NA	K19582	NA	phospholipid phosphatase related 3 [Source:NCBI gene;Acc:100511492]	protein_coding	3.16	1.66	0	1	up	yes
ENSSSCG00000014251	ENSSSCG00000014251	ENSSSCT00000015571	GO:0005515(protein binding)	NA	NA	NA		protein_coding	2.4	1.26	0.01	1	up	yes
ENSSSCG00000007964	ENSSSCG00000007964	ENSSSCT00000050183;ENSSSCT00000028537;ENSSSCT00000008727;ENSSSCT00000033336	GO:0003779(actin binding);GO:0005737(cytoplasm);GO:0005875(microtubule associated complex);GO:0006954(inflammatory response);GO:0008270(zinc ion binding);GO:0010508(positive regulation of autophagy);GO:0034341(response to interferon-gamma);GO:0034341(response to interferon-gamma)	04621(NOD-like receptor signaling pathway);04621(NOD-like receptor signaling pathway)	K12803	NA	MEFV, pyrin innate immunity regulator [Source:NCBI gene;Acc:100517333]	protein_coding	2.38	1.25	0.01	1	up	yes
ENSSSCG00000038946	SLC17A8	ENSSSCT00000057861	GO:0005313(L-glutamate transmembrane transporter activity);GO:0015813(L-glutamate transmembrane transport);GO:0016020(membrane);GO:0016021(integral component of membrane);GO:0030285(integral component of synaptic vesicle membrane);GO:0030672(synaptic vesicle membrane);GO:0055085(transmembrane transport);GO:0098700(neurotransmitter loading into synaptic vesicle)	04721(Synaptic vesicle cycle);04723(Retrograde endocannabinoid signaling);04724(Glutamatergic synapse);05033(Nicotine addiction)	K12302	NA	solute carrier family 17 member 8 [Source:NCBI gene;Acc:100526221]	protein_coding	2.09	1.06	0.01	1	up	yes
ENSSSCG00000004670	C15orf48	ENSSSCT00000005156;ENSSSCT00000051441	GO:0004129(cytochrome-c oxidase activity);GO:0005634(nucleus);GO:0005751(mitochondrial respiratory chain complex IV);GO:0009617(response to bacterium);GO:0022900(electron transport chain);GO:1902600(proton transmembrane transport);GO:1902600(proton transmembrane transport)	NA	NA	NA	chromosome 1 C15orf48 homolog [Source:NCBI gene;Acc:100152534]	protein_coding	2.52	1.33	0.01	1	up	yes
ENSSSCG00000017557	WFIKKN2	ENSSSCT00000019112	GO:0001501(skeletal system development);GO:0004867(serine-type endopeptidase inhibitor activity);GO:0005515(protein binding);GO:0005576(extracellular region);GO:0005615(extracellular space);GO:0007179(transforming growth factor beta receptor signaling pathway);GO:0010466(negative regulation of peptidase activity);GO:0010951(negative regulation of endopeptidase activity);GO:0030414(peptidase inhib…	NA	NA	NA	WAP, follistatin/kazal, immunoglobulin, kunitz and netrin domain containing 2 [Source:NCBI gene;Acc:100512012]	protein_coding	2.41	1.27	0.01	1	up	yes
ENSSSCG00000014988	MMP13	ENSSSCT00000016351	GO:0001958(endochondral ossification);GO:0003417(growth plate cartilage development);GO:0004222(metalloendopeptidase activity);GO:0005509(calcium ion binding);GO:0005518(collagen binding);GO:0005576(extracellular region);GO:0005615(extracellular space);GO:0006508(proteolysis);GO:0008233(peptidase activity);GO:0008237(metallopeptidase activity);GO:0008270(zinc ion binding);GO:0016787(hydrolase act…	04657(IL-17 signaling pathway);04926(Relaxin signaling pathway);04928(Parathyroid hormone synthesis, secretion and action)	K07994	EC:3.4.24.-	matrix metallopeptidase 13 [Source:NCBI gene;Acc:397346]	protein_coding	3.59	1.84	0.01	1	up	yes
ENSSSCG00000039300	IL27	ENSSSCT00000039070	GO:0002230(positive regulation of defense response to virus by host);GO:0005102(signaling receptor binding);GO:0005615(extracellular space);GO:0042129(regulation of T cell proliferation);GO:0045078(positive regulation of interferon-gamma biosynthetic process);GO:0045523(interleukin-27 receptor binding);GO:0045625(regulation of T-helper 1 cell differentiation)	04060(Cytokine-cytokine receptor interaction)	K22629	NA	interleukin 27 [Source:NCBI gene;Acc:493187]	protein_coding	18.05	4.17	0.01	1	up	yes
ENSSSCG00000017792	CORO6	ENSSSCT00000024471;ENSSSCT00000019364	GO:0005515(protein binding);GO:0005515(protein binding)	NA	K13886	NA	coronin 6 [Source:NCBI gene;Acc:100516758]	protein_coding	2.64	1.4	0.01	1	up	yes
ENSSSCG00000014895	ENSSSCG00000014895	ENSSSCT00000052907	GO:0007157(heterophilic cell-cell adhesion via plasma membrane cell adhesion molecules);GO:0007165(signal transduction);GO:0016021(integral component of membrane);GO:0042803(protein homodimerization activity);GO:0043005(neuron projection);GO:0046982(protein heterodimerization activity);GO:0048666(neuron development);GO:0050839(cell adhesion molecule binding)	NA	NA	NA		protein_coding	6.27	2.65	0.01	1	up	yes
ENSSSCG00000031022	IFN-DELTA-7	ENSSSCT00000033577	GO:0005125(cytokine activity);GO:0005126(cytokine receptor binding);GO:0005576(extracellular region);GO:0005615(extracellular space);GO:0006952(defense response);GO:0010469(regulation of signaling receptor activity);GO:0051607(defense response to virus)	NA	NA	NA	interferon delta 7 [Source:NCBI gene;Acc:100303727]	protein_coding	######	11.03	0.01	1	up	yes
ENSSSCG00000003423	DRAXIN	ENSSSCT00000003798;ENSSSCT00000003797	GO:0005576(extracellular region);GO:0007275(multicellular organism development);GO:0007411(axon guidance);GO:0016055(Wnt signaling pathway);GO:0021516(dorsal spinal cord development);GO:0021528(commissural neuron differentiation in spinal cord);GO:0030517(negative regulation of axon extension);GO:0030900(forebrain development);GO:0043524(negative regulation of neuron apoptotic process);GO:0090090…	NA	NA	NA	dorsal inhibitory axon guidance protein [Source:NCBI gene;Acc:100524629]	protein_coding	142.43	7.15	0.01	1	up	yes
ENSSSCG00000040746	LRP2	ENSSSCT00000039755;ENSSSCT00000061421;ENSSSCT00000047664;ENSSSCT00000054482	GO:0001843(neural tube closure);GO:0003139(secondary heart field specification);GO:0003148(outflow tract septum morphogenesis);GO:0003223(ventricular compact myocardium morphogenesis);GO:0003281(ventricular septum development);GO:0005509(calcium ion binding);GO:0005515(protein binding);GO:0005768(endosome);GO:0005783(endoplasmic reticulum);GO:0005794(Golgi apparatus);GO:0005903(brush border);GO:0…	04340(Hedgehog signaling pathway);04918(Thyroid hormone synthesis);04979(Cholesterol metabolism);04979(Cholesterol metabolism)	K06233	NA	LDL receptor related protein 2 [Source:NCBI gene;Acc:100519689]	protein_coding	2.04	1.03	0.01	1	up	yes
ENSSSCG00000021315	ENSSSCG00000021315	ENSSSCT00000022930	GO:0016020(membrane);GO:0016021(integral component of membrane)	04514(Cell adhesion molecules (CAMs))	K07377	NA	neurexin 3 [Source:NCBI gene;Acc:100620189]	protein_coding	376.72	8.56	0.01	1	up	yes
ENSSSCG00000016247	TM4SF20	ENSSSCT00000017691	GO:0005789(endoplasmic reticulum membrane);GO:0005886(plasma membrane);GO:0005925(focal adhesion);GO:0016020(membrane);GO:0016021(integral component of membrane);GO:0045861(negative regulation of proteolysis)	NA	NA	NA	transmembrane 4 L six family member 20 [Source:NCBI gene;Acc:100513630]	protein_coding	2.95	1.56	0.01	1	up	yes
ENSSSCG00000040070	FREM3	ENSSSCT00000044585	GO:0005604(basement membrane);GO:0007154(cell communication);GO:0016021(integral component of membrane)	NA	NA	NA	FRAS1 related extracellular matrix 3 [Source:NCBI gene;Acc:100526232]	protein_coding	9.93	3.31	0.01	1	up	yes
ENSSSCG00000026695	TNFSF14	ENSSSCT00000025464	GO:0005102(signaling receptor binding);GO:0005125(cytokine activity);GO:0005164(tumor necrosis factor receptor binding);GO:0005515(protein binding);GO:0005615(extracellular space);GO:0006915(apoptotic process);GO:0006955(immune response);GO:0010469(regulation of signaling receptor activity);GO:0010820(positive regulation of T cell chemotaxis);GO:0016020(membrane);GO:0016021(integral component of …	04060(Cytokine-cytokine receptor interaction);04064(NF-kappa B signaling pathway);05168(Herpes simplex virus 1 infection)	K05477	NA	TNF superfamily member 14 [Source:NCBI gene;Acc:100519468]	protein_coding	792.27	9.63	0.01	1	up	yes
ENSSSCG00000003737	NOL4	ENSSSCT00000064714	GO:0005730(nucleolus)	NA	NA	NA	nucleolar protein 4 [Source:NCBI gene;Acc:100518847]	protein_coding	4.81	2.27	0.01	1	up	yes
ENSSSCG00000009735	P2RX2	ENSSSCT00000064628;ENSSSCT00000010673	GO:0001614(purinergic nucleotide receptor activity);GO:0001666(response to hypoxia);GO:0003029(detection of hypoxic conditions in blood by carotid body chemoreceptor signaling);GO:0004931(extracellularly ATP-gated cation channel activity);GO:0005216(ion channel activity);GO:0005524(ATP binding);GO:0005639(integral component of nuclear inner membrane);GO:0005886(plasma membrane);GO:0005887(integra…	04020(Calcium signaling pathway);04080(Neuroactive ligand-receptor interaction);04742(Taste transduction);04742(Taste transduction)	K05216	NA	purinergic receptor P2X 2 [Source:NCBI gene;Acc:100736581]	protein_coding	947.26	9.89	0.02	1	up	yes
ENSSSCG00000000257	ITGB7	ENSSSCT00000043023;ENSSSCT00000057390	GO:0003366(cell-matrix adhesion involved in ameboidal cell migration);GO:0005178(integrin binding);GO:0005925(focal adhesion);GO:0007155(cell adhesion);GO:0007160(cell-matrix adhesion);GO:0007229(integrin-mediated signaling pathway);GO:0008305(integrin complex);GO:0009986(cell surface);GO:0016020(membrane);GO:0016021(integral component of membrane);GO:0016477(cell migration);GO:0033627(cell adhes…	NA	K08529	NA	integrin subunit beta 7 [Source:NCBI gene;Acc:397221]	protein_coding	2.02	1.02	0.02	1	up	yes
ENSSSCG00000001844	PLIN1	ENSSSCT00000002067	GO:0005623(cell);GO:0005811(lipid droplet);GO:0005829(cytosol);GO:0016042(lipid catabolic process);GO:0050995(negative regulation of lipid catabolic process);GO:0071944(cell periphery)	03320(PPAR signaling pathway);04371(Apelin signaling pathway);04714(Thermogenesis);04923(Regulation of lipolysis in adipocytes)	K08768	NA	perilipin 1 [Source:NCBI gene;Acc:654411]	protein_coding	705.88	9.46	0.02	1	up	yes
ENSSSCG00000011910	ENSSSCG00000011910	ENSSSCT00000013033	GO:0000724(double-strand break repair via homologous recombination);GO:0006406(mRNA export from nucleus);GO:0008541(proteasome regulatory particle, lid subcomplex);GO:0043248(proteasome assembly)	03050(Proteasome);03440(Homologous recombination);05169(Epstein-Barr virus infection)	K10881	NA	SEM1, 26S proteasome complex subunit [Source:NCBI gene;Acc:100155621]	protein_coding	4.25	2.09	0.03	1	up	yes
ENSSSCG00000009543	MYO16	ENSSSCT00000010461	GO:0000166(nucleotide binding);GO:0003774(motor activity);GO:0003779(actin binding);GO:0005515(protein binding);GO:0005524(ATP binding);GO:0014065(phosphatidylinositol 3-kinase signaling);GO:0016459(myosin complex);GO:0048812(neuron projection morphogenesis)	NA	K17481	NA	myosin XVI [Source:NCBI gene;Acc:102161679]	protein_coding	430.86	8.75	0.03	1	up	yes
ENSSSCG00000001616	TREML2	ENSSSCT00000024614	GO:0009986(cell surface);GO:0016020(membrane);GO:0016021(integral component of membrane);GO:0038023(signaling receptor activity);GO:0042110(T cell activation)	NA	K14364	NA	triggering receptor expressed on myeloid cells like 2 [Source:NCBI gene;Acc:100738047]	protein_coding	11.52	3.53	0.03	1	up	yes
ENSSSCG00000021645	MROH2B	ENSSSCT00000023181	GO:0001669(acrosomal vesicle);GO:0005737(cytoplasm);GO:0010737(protein kinase A signaling);GO:0036126(sperm flagellum);GO:0097225(sperm midpiece)	NA	NA	NA	maestro heat like repeat family member 2B [Source:NCBI gene;Acc:100521872]	protein_coding	222.1	7.8	0.03	1	up	yes
ENSSSCG00000016022	ZNF804A	ENSSSCT00000064988;ENSSSCT00000017445	GO:0005634(nucleus);GO:0005737(cytoplasm);GO:0005886(plasma membrane);GO:0010628(positive regulation of gene expression);GO:0010975(regulation of neuron projection development);GO:0010976(positive regulation of neuron projection development);GO:0030426(growth cone);GO:0043025(neuronal cell body);GO:0043197(dendritic spine);GO:0043198(dendritic shaft);GO:0098794(postsynapse);GO:1901588(dendritic m…	NA	NA	NA	zinc finger protein 804A [Source:NCBI gene;Acc:100524346]	protein_coding	2.83	1.5	0.03	1	up	yes
ENSSSCG00000004646	ATP8B4	ENSSSCT00000061016;ENSSSCT00000005131;ENSSSCT00000048557	GO:0000166(nucleotide binding);GO:0000287(magnesium ion binding);GO:0004012(phospholipid-translocating ATPase activity);GO:0005524(ATP binding);GO:0005794(Golgi apparatus);GO:0005886(plasma membrane);GO:0007030(Golgi organization);GO:0015914(phospholipid transport);GO:0016020(membrane);GO:0016021(integral component of membrane);GO:0045332(phospholipid translocation);GO:0045332(phospholipid transl…	NA	K01530	EC:7.6.2.1	ATPase phospholipid transporting 8B4 (putative) [Source:NCBI gene;Acc:100154720]	protein_coding	3.11	1.64	0.03	1	up	yes
ENSSSCG00000034919	GDA	ENSSSCT00000062433	GO:0006147(guanine catabolic process);GO:0008270(zinc ion binding);GO:0008892(guanine deaminase activity);GO:0016787(hydrolase activity);GO:0016810(hydrolase activity, acting on carbon-nitrogen (but not peptide) bonds)	00230(Purine metabolism)	K01487	EC:3.5.4.3	guanine deaminase [Source:NCBI gene;Acc:100621043]	protein_coding	19.27	4.27	0.03	1	up	yes
ENSSSCG00000037358	ENSSSCG00000037358	ENSSSCT00000042621	GO:0005576(extracellular region);GO:0005615(extracellular space);GO:0006953(acute-phase response);GO:0007252(I-kappaB phosphorylation);GO:0009617(response to bacterium);GO:0010629(negative regulation of gene expression);GO:0010739(positive regulation of protein kinase A signaling);GO:0033138(positive regulation of peptidyl-serine phosphorylation);GO:0034364(high-density lipoprotein particle);GO:0…	NA	K17310	NA	serum amyloid A-3 protein [Source:NCBI gene;Acc:733603]	protein_coding	6.28	2.65	0.03	1	up	yes
ENSSSCG00000002658	FOXL1	ENSSSCT00000002949	GO:0000981(DNA-binding transcription factor activity, RNA polymerase II-specific);GO:0003677(DNA binding);GO:0003700(DNA-binding transcription factor activity);GO:0005634(nucleus);GO:0006355(regulation of transcription, DNA-templated);GO:0006357(regulation of transcription by RNA polymerase II);GO:0007495(visceral mesoderm-endoderm interaction involved in midgut development);GO:0007507(heart deve…	NA	K09405	NA	forkhead box L1 [Source:NCBI gene;Acc:100511634]	protein_coding	5.81	2.54	0.03	1	up	yes
ENSSSCG00000040317	SOD2	ENSSSCT00000056447;ENSSSCT00000039602	GO:0000302(response to reactive oxygen species);GO:0000303(response to superoxide);GO:0001306(age-dependent response to oxidative stress);GO:0001836(release of cytochrome c from mitochondria);GO:0001889(liver development);GO:0003032(detection of oxygen);GO:0003069(acetylcholine-mediated vasodilation involved in regulation of systemic arterial blood pressure);GO:0004784(superoxide dismutase activi…	04068(FoxO signaling pathway);04146(Peroxisome);04211(Longevity regulating pathway);04213(Longevity regulating pathway - multiple species);05016(Huntington disease);05016(Huntington disease)	K04564	EC:1.15.1.1	superoxide dismutase 2 [Source:NCBI gene;Acc:100154319]	protein_coding	2.13	1.09	0.03	1	up	yes
ENSSSCG00000003275	ENSSSCG00000003275	ENSSSCT00000022595;ENSSSCT00000062957	NA	NA	NA	NA		protein_coding	682.41	9.41	0.04	1	up	yes
ENSSSCG00000008742	CD38	ENSSSCT00000009565	GO:0003953(NAD+ nucleosidase activity);GO:0005886(plasma membrane);GO:0016020(membrane);GO:0016021(integral component of membrane);GO:0016849(phosphorus-oxygen lyase activity);GO:0030890(positive regulation of B cell proliferation);GO:0042493(response to drug);GO:0043066(negative regulation of apoptotic process);GO:0045892(negative regulation of transcription, DNA-templated);GO:0045893(positive r…	00760(Nicotinate and nicotinamide metabolism);04020(Calcium signaling pathway);04640(Hematopoietic cell lineage);04921(Oxytocin signaling pathway);04970(Salivary secretion);04972(Pancreatic secretion)	K01242	2.4.99.20;EC:3.2.2.6	CD38 molecule [Source:NCBI gene;Acc:100511702]	protein_coding	2.09	1.06	0.04	1	up	yes
ENSSSCG00000014052	EIF4E1B	ENSSSCT00000015350	GO:0000340(RNA 7-methylguanosine cap binding);GO:0003723(RNA binding);GO:0003743(translation initiation factor activity);GO:0005737(cytoplasm);GO:0006412(translation);GO:0006413(translational initiation);GO:0016281(eukaryotic translation initiation factor 4F complex)	01521(EGFR tyrosine kinase inhibitor resistance);03013(RNA transport);04066(HIF-1 signaling pathway);04150(mTOR signaling pathway);04151(PI3K-Akt signaling pathway);04211(Longevity regulating pathway);04910(Insulin signaling pathway)	K03259	NA	eukaryotic translation initiation factor 4E family member 1B [Source:NCBI gene;Acc:100523233]	protein_coding	22.08	4.46	0.04	1	up	yes
ENSSSCG00000010103	ENSSSCG00000010103	ENSSSCT00000011064	GO:0000166(nucleotide binding);GO:0000226(microtubule cytoskeleton organization);GO:0000278(mitotic cell cycle);GO:0003924(GTPase activity);GO:0005200(structural constituent of cytoskeleton);GO:0005525(GTP binding);GO:0005737(cytoplasm);GO:0005856(cytoskeleton);GO:0005874(microtubule);GO:0007017(microtubule-based process)	04145(Phagosome);04210(Apoptosis);04530(Tight junction);04540(Gap junction)	K07374	NA	tubulin alpha-3 chain [Source:NCBI gene;Acc:100155138]	protein_coding	6.31	2.66	0.04	1	up	yes
ENSSSCG00000009801	BCL7A	ENSSSCT00000040072;ENSSSCT00000010743	NA	NA	NA	NA	BCL7A, BAF complex component [Source:NCBI gene;Acc:100736875]	protein_coding	2.28	1.19	0.04	1	up	yes
ENSSSCG00000005584	CRB2	ENSSSCT00000006137	GO:0001707(mesoderm formation);GO:0001756(somitogenesis);GO:0005509(calcium ion binding);GO:0005886(plasma membrane);GO:0007157(heterophilic cell-cell adhesion via plasma membrane cell adhesion molecules);GO:0010470(regulation of gastrulation);GO:0010718(positive regulation of epithelial to mesenchymal transition);GO:0010951(negative regulation of endopeptidase activity);GO:0014028(notochord form…	04390(Hippo signaling pathway)	K16681	NA	crumbs cell polarity complex component 2 [Source:NCBI gene;Acc:100511431]	protein_coding	8.4	3.07	0.04	1	up	yes
ENSSSCG00000031976	ANKRD53	ENSSSCT00000064705	GO:0000922(spindle pole);GO:0005515(protein binding);GO:0005819(spindle);GO:0007080(mitotic metaphase plate congression);GO:0031116(positive regulation of microtubule polymerization);GO:0060236(regulation of mitotic spindle organization);GO:1902412(regulation of mitotic cytokinesis)	NA	K21441	NA	ankyrin repeat domain 53 [Source:NCBI gene;Acc:100739578]	protein_coding	343.08	8.42	0.04	1	up	yes
ENSSSCG00000000636	ENSSSCG00000000636	ENSSSCT00000000683	GO:0016020(membrane);GO:0016021(integral component of membrane);GO:0030246(carbohydrate binding)	NA	NA	NA	killer cell lectin-like receptor subfamily A, member 1 [Source:NCBI gene;Acc:397612]	protein_coding	######	10.3	0.04	1	up	yes
ENSSSCG00000003483	ENSSSCG00000003483	ENSSSCT00000055053;ENSSSCT00000003869	GO:0004668(protein-arginine deiminase activity);GO:0005509(calcium ion binding);GO:0005634(nucleus);GO:0005737(cytoplasm);GO:0016020(membrane);GO:0016021(integral component of membrane);GO:0018101(protein citrullination);GO:0036414(histone citrullination);GO:0036414(histone citrullination)	NA	K01481	EC:3.5.3.15	peptidyl arginine deiminase 4 [Source:NCBI gene;Acc:100524749]	protein_coding	717.49	9.49	0.04	1	up	yes
ENSSSCG00000003069	KCNN4	ENSSSCT00000003406	GO:0005267(potassium channel activity);GO:0005516(calmodulin binding);GO:0005886(plasma membrane);GO:0006813(potassium ion transport);GO:0006816(calcium ion transport);GO:0006884(cell volume homeostasis);GO:0015269(calcium-activated potassium channel activity);GO:0016020(membrane);GO:0016021(integral component of membrane);GO:0016286(small conductance calcium-activated potassium channel activity)…	04911(Insulin secretion);04970(Salivary secretion);04974(Protein digestion and absorption)	K04945	NA	potassium calcium-activated channel subfamily N member 4 [Source:NCBI gene;Acc:397081]	protein_coding	614.57	9.26	0.05	1	up	yes
ENSSSCG00000003666	ENSSSCG00000003666	ENSSSCT00000004062	GO:0008410(CoA-transferase activity)	NA	NA	NA	succinyl-CoA:3-ketoacid coenzyme A transferase 2, mitochondrial [Source:NCBI gene;Acc:102162296]	protein_coding	6.63	2.73	0.05	1	up	yes
ENSSSCG00000026203	NXPE4	ENSSSCT00000030869	GO:0016020(membrane);GO:0016021(integral component of membrane)	NA	NA	NA	neurexophilin and PC-esterase domain family member 4 [Source:HGNC Symbol;Acc:HGNC:23117]	protein_coding	655.5	9.36	0.05	1	up	yes
ENSSSCG00000031080	HAND1	ENSSSCT00000043495	GO:0000122(negative regulation of transcription by RNA polymerase II);GO:0000978(RNA polymerase II proximal promoter sequence-specific DNA binding);GO:0000981(DNA-binding transcription factor activity, RNA polymerase II-specific);GO:0001227(DNA-binding transcription repressor activity, RNA polymerase II-specific);GO:0001525(angiogenesis);GO:0001701(in utero embryonic development);GO:0001707(mesod…	04550(Signaling pathways regulating pluripotency of stem cells)	K09071	NA	heart and neural crest derivatives expressed 1 [Source:NCBI gene;Acc:541594]	protein_coding	254.6	7.99	0.05	1	up	yes

## Sheet: Supplemental Table S4
Table S4: Results of Gene Ontology enrichment analysis of differentially expressed genes significantly modulated by LPS in the porcine corpus luteum
GO_ID	GO_Term	GO_function	GO_class	pvalue	Gene_ID	Gene_name	Description	FPKM.LPS_1	FPKM.LPS_2	FPKM.LPS_3	FPKM.LPS_4	FPKM.CTR_1	FPKM.CTR_2	FPKM.CTR_3	FPKM.CTR_4	fc	log2(fc)	regulation
GO:0005576	extracellular region	cellular_component	3	3.14337e-06	ENSSSCG00000003423	DRAXIN	dorsal inhibitory axon guidance protein [Source:NCBI gene;Acc:100524629]	0.00774	0.008041	0.015319	0.025872	0	0	0	0	142.43	7.15411	up
GO:0005576	extracellular region	cellular_component	3	3.14337e-06	ENSSSCG00000005214	INSL6	insulin like 6 [Source:NCBI gene;Acc:100158105]	0	0	0	0	0.309859	0.19965	0.377705	0	0.00045085	-11.1151	down
GO:0005576	extracellular region	cellular_component	3	3.14337e-06	ENSSSCG00000005360	IGFBPL1	insulin like growth factor binding protein like 1 [Source:NCBI gene;Acc:100155070]	0	0	0	0	0.02466	0	0.022178	0.037632	0.00473541	-7.7223	down
GO:0005576	extracellular region	cellular_component	3	3.14337e-06	ENSSSCG00000006172	PI15	peptidase inhibitor 15 [Source:NCBI gene;Acc:100158209]	4.51489	8.68917	5.46081	8.26502	25.2223	7.85595	5.84192	59.4785	0.273681	-1.86943	down
GO:0005576	extracellular region	cellular_component	3	3.14337e-06	ENSSSCG00000011110	CCDC3	coiled-coil domain-containing protein 3 [Source:NCBI gene;Acc:100510975]	2.75071	0.930901	0.982636	0.802897	8.75776	1.4694	0.913093	5.07058	0.337253	-1.5681	down
GO:0005576	extracellular region	cellular_component	3	3.14337e-06	ENSSSCG00000012101	ENSSSCG00000012101	anosmin 1 [Source:NCBI gene;Acc:100154011]	0	0	0	0	0.171408	0.029846	0.104454	0.056215	0.00110521	-9.82147	down
GO:0005576	extracellular region	cellular_component	3	3.14337e-06	ENSSSCG00000014988	MMP13	matrix metallopeptidase 13 [Source:NCBI gene;Acc:397346]	4.41573	0.779192	2.73243	0.822949	1.12681	0.478646	0.65519	0.178644	3.58723	1.84287	up
GO:0005576	extracellular region	cellular_component	3	3.14337e-06	ENSSSCG00000015636	VSTM2A	V-set and transmembrane domain containing 2A [Source:NCBI gene;Acc:100517233]	0	0	0	0	0.259666	0	0	0	0.00154044	-9.34244	down
GO:0005576	extracellular region	cellular_component	3	3.14337e-06	ENSSSCG00000017557	WFIKKN2	WAP, follistatin/kazal, immunoglobulin, kunitz and netrin domain containing 2 [Source:NCBI gene;Acc:100512012]	0.249887	0.205871	0.126918	0.160349	0.071994	0.093531	0.050522	0.09217	2.41072	1.26946	up
GO:0005576	extracellular region	cellular_component	3	3.14337e-06	ENSSSCG00000020970	IL6	interleukin 6 [Source:NCBI gene;Acc:399500]	2.51923	2.82316	4.87588	5.13129	5.23923	6.45856	9.15744	20.8768	0.367813	-1.44296	down
GO:0005576	extracellular region	cellular_component	3	3.14337e-06	ENSSSCG00000031022	IFN-DELTA-7	interferon delta 7 [Source:NCBI gene;Acc:100303727]	0.262573	0.106276	0.0713	0.396111	0	0	0	0	2090.65	11.0297	up
GO:0005576	extracellular region	cellular_component	3	3.14337e-06	ENSSSCG00000032521	ENSSSCG00000032521		0	0	0.0892744	0.109528	0.332956	0.32143	0.260953	0.239671	0.172122	-2.5385	down
GO:0005576	extracellular region	cellular_component	3	3.14337e-06	ENSSSCG00000036007	MFAP4	microfibril associated protein 4 [Source:NCBI gene;Acc:110256120]	0.672427	0.116995	0.027877	0.053744	2.46429	0.02652	0.026398	2.87465	0.161548	-2.62997	down
GO:0005576	extracellular region	cellular_component	3	3.14337e-06	ENSSSCG00000037358	ENSSSCG00000037358	serum amyloid A-3 protein [Source:NCBI gene;Acc:733603]	16.2985	26.5234	0.799804	11.4058	5.65267	2.30216	0.073928	0.729559	6.28289	2.65143	up
GO:0005576	extracellular region	cellular_component	3	3.14337e-06	ENSSSCG00000037684	PDYN	prodynorphin [Source:NCBI gene;Acc:445529]	1.54458	1.47723	2.49974	1.41827	2.6421	22.0147	1.64546	2.12709	0.244107	-2.03441	down
GO:0005576	extracellular region	cellular_component	3	3.14337e-06	ENSSSCG00000039721	PRL	prolactin [Source:NCBI gene;Acc:396965]	0	0	0	0	0.017715	0	0.066378	0.032532	0.0034298	-8.18766	down
GO:0016021	integral component of membrane	cellular_component	5	0.000495376	ENSSSCG00000000257	ITGB7	integrin subunit beta 7 [Source:NCBI gene;Acc:397221]	0.185201	0.227381	0.35861	0.515071	0.180725	0.12515	0.146028	0.18352	2.02426	1.01739	up
GO:0016021	integral component of membrane	cellular_component	5	0.000495376	ENSSSCG00000000636	ENSSSCG00000000636	killer cell lectin-like receptor subfamily A, member 1 [Source:NCBI gene;Acc:397612]	0	0.060397	0.115643	0.329598	0	0	0	0	1264.1	10.3039	up
GO:0016021	integral component of membrane	cellular_component	5	0.000495376	ENSSSCG00000001616	TREML2	triggering receptor expressed on myeloid cells like 2 [Source:NCBI gene;Acc:100738047]	0.054533	0.06149	0.031063	0.055344	0	0	0	0.017578	11.5161	3.52558	up
GO:0016021	integral component of membrane	cellular_component	5	0.000495376	ENSSSCG00000001872	LINGO1	leucine rich repeat and Ig domain containing 1 [Source:NCBI gene;Acc:100155465]	0.100141	0.0945755	0.0313381	0.0508434	0.301034	0.291748	0.0916974	0.132854	0.338782	-1.56157	down
GO:0016021	integral component of membrane	cellular_component	5	0.000495376	ENSSSCG00000002927	LRFN3	leucine rich repeat and fibronectin type III domain containing 3 [Source:NCBI gene;Acc:100738610]	0	0	0	0	0.160984	0	0.026081	0.264803	0.000885214	-10.1417	down
GO:0016021	integral component of membrane	cellular_component	5	0.000495376	ENSSSCG00000003069	KCNN4	potassium calcium-activated channel subfamily N member 4 [Source:NCBI gene;Acc:397081]	0	0	0.140078	0.105751	0	0	0	0	614.572	9.26344	up
GO:0016021	integral component of membrane	cellular_component	5	0.000495376	ENSSSCG00000003386	TNFRSF9	TNF receptor superfamily member 9 [Source:NCBI gene;Acc:100519368]	0.0695877	0.12297	0.188732	0.130953	0.288478	0.336174	0.185547	0.284585	0.467894	-1.09575	down
GO:0016021	integral component of membrane	cellular_component	5	0.000495376	ENSSSCG00000003483	ENSSSCG00000003483	peptidyl arginine deiminase 4 [Source:NCBI gene;Acc:100524749]	0.0307738	0	0.256222	0	0	0	0	0	717.489	9.48681	up
GO:0016021	integral component of membrane	cellular_component	5	0.000495376	ENSSSCG00000004646	ATP8B4	ATPase phospholipid transporting 8B4 (putative) [Source:NCBI gene;Acc:100154720]	0.0615731	0.45834	0.231173	1.22783	0.154983	0.170382	0.0929394	0.217412	3.11289	1.63825	up
GO:0016021	integral component of membrane	cellular_component	5	0.000495376	ENSSSCG00000005584	CRB2	crumbs cell polarity complex component 2 [Source:NCBI gene;Acc:100511431]	0.040431	0.018636	0.010025	0.022794	0	0	0	0.010935	8.40293	3.07089	up
GO:0016021	integral component of membrane	cellular_component	5	0.000495376	ENSSSCG00000007728	ENSSSCG00000007728		0.342202	0.29118	0	0.350267	0	0	0	0	2459.12	11.2639	up
GO:0016021	integral component of membrane	cellular_component	5	0.000495376	ENSSSCG00000008742	CD38	CD38 molecule [Source:NCBI gene;Acc:100511702]	3.70184	3.39609	0.812398	2.31241	1.78349	1.58737	0.572801	0.953064	2.08767	1.06189	up
GO:0016021	integral component of membrane	cellular_component	5	0.000495376	ENSSSCG00000009735	P2RX2	purinergic receptor P2X 2 [Source:NCBI gene;Acc:100736581]	0	0.124022	0.170384	0.0845002	0	0	0	0	947.265	9.88762	up
GO:0016021	integral component of membrane	cellular_component	5	0.000495376	ENSSSCG00000009842	CCDC60	coiled-coil domain containing 60 [Source:NCBI gene;Acc:110255219]	0	0.0434374	0.0155037	0.0175279	0.068209	0.172322	0.144952	0.0563136	0.173087	-2.53043	down
GO:0016021	integral component of membrane	cellular_component	5	0.000495376	ENSSSCG00000010009	GAL3ST1	galactose-3-O-sulfotransferase 1 [Source:NCBI gene;Acc:100155265]	0.0467954	0.0789851	0.115817	0.0450968	0.186846	0.185555	0.188765	0.104908	0.430424	-1.21617	down
GO:0016021	integral component of membrane	cellular_component	5	0.000495376	ENSSSCG00000010325	KCNMA1	potassium calcium-activated channel subfamily M alpha 1 [Source:NCBI gene;Acc:397434]	0.11953	0.0259335	0.020903	0.0945038	0.585101	0.119901	0.110312	0.14883	0.270572	-1.88592	down
GO:0016021	integral component of membrane	cellular_component	5	0.000495376	ENSSSCG00000011735	SI	sucrase-isomaltase [Source:NCBI gene;Acc:100623884]	0	0	0.126363	0	0	0	0	0	315.907	8.30336	up
GO:0016021	integral component of membrane	cellular_component	5	0.000495376	ENSSSCG00000013754	CACNA1A	calcium voltage-gated channel subunit alpha1 A [Source:NCBI gene;Acc:100525387]	0.02133	0.00985703	0.0134541	0.0178186	0.0498397	0.0472018	0.0284099	0.0521617	0.351662	-1.50774	down
GO:0016021	integral component of membrane	cellular_component	5	0.000495376	ENSSSCG00000014895	ENSSSCG00000014895		0.447294	2.77269	1.13723	1.15876	0	0.512435	0.137954	0.229386	6.26975	2.64841	up
GO:0016021	integral component of membrane	cellular_component	5	0.000495376	ENSSSCG00000015205	HEPACAM	hepatic and glial cell adhesion molecule [Source:NCBI gene;Acc:100523198]	0.566281	0	0	0	0	0	0	0	1415.7	10.4673	up
GO:0016021	integral component of membrane	cellular_component	5	0.000495376	ENSSSCG00000015636	VSTM2A	V-set and transmembrane domain containing 2A [Source:NCBI gene;Acc:100517233]	0	0	0	0	0.259666	0	0	0	0.00154044	-9.34244	down
GO:0016021	integral component of membrane	cellular_component	5	0.000495376	ENSSSCG00000016247	TM4SF20	transmembrane 4 L six family member 20 [Source:NCBI gene;Acc:100513630]	0.45096	0.388991	0.206182	0.350654	0.064814	0.204073	0.141277	0.062815	2.95317	1.56226	up
GO:0016021	integral component of membrane	cellular_component	5	0.000495376	ENSSSCG00000017344	FAM187A	Ig-like V-type domain-containing protein FAM187A [Source:NCBI gene;Acc:102165039]	0.039504	0.094386	0.020916	0.038273	0.166873	0.206154	0.068747	0.133034	0.335902	-1.57389	down
GO:0016021	integral component of membrane	cellular_component	5	0.000495376	ENSSSCG00000017583	SGCA	sarcoglycan alpha [Source:NCBI gene;Acc:100240723]	0	0	0.007643	0	0.088343	0.0481123	0	0.048865	0.0412421	-4.59974	down
GO:0016021	integral component of membrane	cellular_component	5	0.000495376	ENSSSCG00000021315	ENSSSCG00000021315	neurexin 3 [Source:NCBI gene;Acc:100620189]	0	0.0829555	0.028664	0.0390683	0	0	0	0	376.72	8.55735	up
GO:0016021	integral component of membrane	cellular_component	5	0.000495376	ENSSSCG00000022961	CLMP	CXADR like membrane protein [Source:NCBI gene;Acc:100512427]	13.811	22.0358	38.0115	16.4248	11.3576	12.5107	8.55634	8.44736	2.20892	1.14334	up
GO:0016021	integral component of membrane	cellular_component	5	0.000495376	ENSSSCG00000023921	VSTM2B	V-set and transmembrane domain containing 2B [Source:NCBI gene;Acc:100627408]	0	0	0	0	0.060492	0	0.043794	0.033264	0.00290803	-8.42574	down
GO:0016021	integral component of membrane	cellular_component	5	0.000495376	ENSSSCG00000024492	EPHB1	EPH receptor B1 [Source:NCBI gene;Acc:100524585]	0.040072	0.135855	0.125182	0.079682	0.16303	0.106112	0.412634	0.215447	0.424411	-1.23647	down
GO:0016021	integral component of membrane	cellular_component	5	0.000495376	ENSSSCG00000026203	NXPE4	neurexophilin and PC-esterase domain family member 4 [Source:HGNC Symbol;Acc:HGNC:23117]	0.155183	0	0.052175	0.054843	0	0	0	0	655.503	9.35646	up
GO:0016021	integral component of membrane	cellular_component	5	0.000495376	ENSSSCG00000026695	TNFSF14	TNF superfamily member 14 [Source:NCBI gene;Acc:100519468]	0.056141	0	0.20312	0.057648	0	0	0	0	792.273	9.62985	up
GO:0016021	integral component of membrane	cellular_component	5	0.000495376	ENSSSCG00000026754	ATCAY	ATCAY, caytaxin [Source:NCBI gene;Acc:100626830]	0	0	0	0	0.089454	0	0.032815	0.015637	0.00290053	-8.42947	down
GO:0016021	integral component of membrane	cellular_component	5	0.000495376	ENSSSCG00000027654	NETO1	neuropilin and tolloid like 1 [Source:NCBI gene;Acc:100622872]	0.00786498	0.036241	0.0440407	0.0587965	0	0	0	0	367.358	8.52104	up
GO:0016021	integral component of membrane	cellular_component	5	0.000495376	ENSSSCG00000027768	SLC29A4	solute carrier family 29 member 4 [Source:NCBI gene;Acc:100624843]	0.07378	0.054982	0.041073	0	0.270753	0.039272	0.15353	0.3182	0.217248	-2.20258	down
GO:0016021	integral component of membrane	cellular_component	5	0.000495376	ENSSSCG00000029651	SLN	sarcolipin [Source:NCBI gene;Acc:733627]	0.037571	0	0.047445	0.08046	0.377891	0.210467	0.117272	0.131093	0.197767	-2.33813	down
GO:0016021	integral component of membrane	cellular_component	5	0.000495376	ENSSSCG00000032113	ENSSSCG00000032113	cationic amino acid transporter 3-like [Source:NCBI gene;Acc:100523440]	0	0	0	0	0.016327	0.0105538	0.0168877	0	0.00913901	-6.77375	down
GO:0016021	integral component of membrane	cellular_component	5	0.000495376	ENSSSCG00000034163	PLN	phospholamban [Source:NCBI gene;Acc:397421]	1.31763	0.663593	1.79408	2.5748	6.43865	2.88279	3.72296	8.02146	0.301441	-1.73005	down
GO:0016021	integral component of membrane	cellular_component	5	0.000495376	ENSSSCG00000035421	ATP8A2	phospholipid-transporting ATPase IB [Source:NCBI gene;Acc:100523747]	0	0	0	0	0	0.106941	0	0	0.00374038	-8.0626	down
GO:0016021	integral component of membrane	cellular_component	5	0.000495376	ENSSSCG00000035727	SURF1	surfeit locus protein 1 [Source:NCBI gene;Acc:110256505]	0.794258	1.0833	1.13023	0.666506	1.04102	2.86432	6.53336	7.01648	0.210499	-2.24811	down
GO:0016021	integral component of membrane	cellular_component	5	0.000495376	ENSSSCG00000036943	C11orf87	chromosome 9 C11orf87 homolog [Source:NCBI gene;Acc:100511522]	0.0371482	0.0509585	0.0122638	0.0598969	0.1157	0.13972	0.0559597	0.106415	0.383603	-1.38231	down
GO:0016021	integral component of membrane	cellular_component	5	0.000495376	ENSSSCG00000037432	PLPPR3	phospholipid phosphatase related 3 [Source:NCBI gene;Acc:100511492]	3.0049	0.399797	2.07203	1.03282	0.489968	0.264633	0.726331	0.577819	3.16189	1.66079	up
GO:0016021	integral component of membrane	cellular_component	5	0.000495376	ENSSSCG00000038602	ENSSSCG00000038602	SOGA family member 3 [Source:NCBI gene;Acc:100512321]	0.0284553	0.0253097	0	0.0190802	0.0613501	0.163273	0.0555039	0.0590117	0.214794	-2.21897	down
GO:0016021	integral component of membrane	cellular_component	5	0.000495376	ENSSSCG00000038946	SLC17A8	solute carrier family 17 member 8 [Source:NCBI gene;Acc:100526221]	0.557141	0.599388	0.741513	0.662693	0.206377	0.366996	0.426302	0.224553	2.09171	1.06469	up
GO:0016021	integral component of membrane	cellular_component	5	0.000495376	ENSSSCG00000039358	SUSD5	sushi domain containing 5 [Source:NCBI gene;Acc:110256562]	0.147395	0.083949	0.045907	0.068649	0.366809	0.158018	0.139422	0.169267	0.414989	-1.26885	down
GO:0016021	integral component of membrane	cellular_component	5	0.000495376	ENSSSCG00000040070	FREM3	FRAS1 related extracellular matrix 3 [Source:NCBI gene;Acc:100526232]	0.100141	0.05369	0.027404	0.014864	0	0	0.008584	0.011156	9.93409	3.31239	up
GO:0016021	integral component of membrane	cellular_component	5	0.000495376	ENSSSCG00000040746	LRP2	LDL receptor related protein 2 [Source:NCBI gene;Acc:100519689]	0.295167	0.701586	0.542765	0.959293	0.184023	0.427094	0.234247	0.380174	2.03895	1.02783	up
GO:0016529	sarcoplasmic reticulum	cellular_component	7	0.000588832	ENSSSCG00000008522	XDH	xanthine dehydrogenase [Source:NCBI gene;Acc:100515259]	0.252166	0.115657	0.157807	0.298556	0.0307525	0.0547913	0.0339726	0.0307205	5.48591	2.45573	up
GO:0016529	sarcoplasmic reticulum	cellular_component	7	0.000588832	ENSSSCG00000029651	SLN	sarcolipin [Source:NCBI gene;Acc:733627]	0.037571	0	0.047445	0.08046	0.377891	0.210467	0.117272	0.131093	0.197767	-2.33813	down
GO:0016529	sarcoplasmic reticulum	cellular_component	7	0.000588832	ENSSSCG00000034163	PLN	phospholamban [Source:NCBI gene;Acc:397421]	1.31763	0.663593	1.79408	2.5748	6.43865	2.88279	3.72296	8.02146	0.301441	-1.73005	down
GO:0045332	phospholipid translocation	biological_process	9	0.00111797	ENSSSCG00000003069	KCNN4	potassium calcium-activated channel subfamily N member 4 [Source:NCBI gene;Acc:397081]	0	0	0.140078	0.105751	0	0	0	0	614.572	9.26344	up
GO:0045332	phospholipid translocation	biological_process	9	0.00111797	ENSSSCG00000004646	ATP8B4	ATPase phospholipid transporting 8B4 (putative) [Source:NCBI gene;Acc:100154720]	0.0615731	0.45834	0.231173	1.22783	0.154983	0.170382	0.0929394	0.217412	3.11289	1.63825	up
GO:0045332	phospholipid translocation	biological_process	9	0.00111797	ENSSSCG00000035421	ATP8A2	phospholipid-transporting ATPase IB [Source:NCBI gene;Acc:100523747]	0	0	0	0	0	0.106941	0	0	0.00374038	-8.0626	down
GO:0005615	extracellular space	cellular_component	4	0.00112072	ENSSSCG00000001872	LINGO1	leucine rich repeat and Ig domain containing 1 [Source:NCBI gene;Acc:100155465]	0.100141	0.0945755	0.0313381	0.0508434	0.301034	0.291748	0.0916974	0.132854	0.338782	-1.56157	down
GO:0005615	extracellular space	cellular_component	4	0.00112072	ENSSSCG00000005360	IGFBPL1	insulin like growth factor binding protein like 1 [Source:NCBI gene;Acc:100155070]	0	0	0	0	0.02466	0	0.022178	0.037632	0.00473541	-7.7223	down
GO:0005615	extracellular space	cellular_component	4	0.00112072	ENSSSCG00000006172	PI15	peptidase inhibitor 15 [Source:NCBI gene;Acc:100158209]	4.51489	8.68917	5.46081	8.26502	25.2223	7.85595	5.84192	59.4785	0.273681	-1.86943	down
GO:0005615	extracellular space	cellular_component	4	0.00112072	ENSSSCG00000008522	XDH	xanthine dehydrogenase [Source:NCBI gene;Acc:100515259]	0.252166	0.115657	0.157807	0.298556	0.0307525	0.0547913	0.0339726	0.0307205	5.48591	2.45573	up
GO:0005615	extracellular space	cellular_component	4	0.00112072	ENSSSCG00000014988	MMP13	matrix metallopeptidase 13 [Source:NCBI gene;Acc:397346]	4.41573	0.779192	2.73243	0.822949	1.12681	0.478646	0.65519	0.178644	3.58723	1.84287	up
GO:0005615	extracellular space	cellular_component	4	0.00112072	ENSSSCG00000017557	WFIKKN2	WAP, follistatin/kazal, immunoglobulin, kunitz and netrin domain containing 2 [Source:NCBI gene;Acc:100512012]	0.249887	0.205871	0.126918	0.160349	0.071994	0.093531	0.050522	0.09217	2.41072	1.26946	up
GO:0005615	extracellular space	cellular_component	4	0.00112072	ENSSSCG00000020970	IL6	interleukin 6 [Source:NCBI gene;Acc:399500]	2.51923	2.82316	4.87588	5.13129	5.23923	6.45856	9.15744	20.8768	0.367813	-1.44296	down
GO:0005615	extracellular space	cellular_component	4	0.00112072	ENSSSCG00000026695	TNFSF14	TNF superfamily member 14 [Source:NCBI gene;Acc:100519468]	0.056141	0	0.20312	0.057648	0	0	0	0	792.273	9.62985	up
GO:0005615	extracellular space	cellular_component	4	0.00112072	ENSSSCG00000030371	ENSSSCG00000030371	serpin A3-8 [Source:NCBI gene;Acc:396685]	0	0	0	0	0.109835	0	0	0.149504	0.00154238	-9.34062	down
GO:0005615	extracellular space	cellular_component	4	0.00112072	ENSSSCG00000031022	IFN-DELTA-7	interferon delta 7 [Source:NCBI gene;Acc:100303727]	0.262573	0.106276	0.0713	0.396111	0	0	0	0	2090.65	11.0297	up
GO:0005615	extracellular space	cellular_component	4	0.00112072	ENSSSCG00000037358	ENSSSCG00000037358	serum amyloid A-3 protein [Source:NCBI gene;Acc:733603]	16.2985	26.5234	0.799804	11.4058	5.65267	2.30216	0.073928	0.729559	6.28289	2.65143	up
GO:0005615	extracellular space	cellular_component	4	0.00112072	ENSSSCG00000037879	ENSSSCG00000037879	galectin 7 [Source:NCBI gene;Acc:100217394]	0	0	0	0	0.277325	0.040935	0	0.14385	0.000865595	-10.174	down
GO:0005615	extracellular space	cellular_component	4	0.00112072	ENSSSCG00000038602	ENSSSCG00000038602	SOGA family member 3 [Source:NCBI gene;Acc:100512321]	0.0284553	0.0253097	0	0.0190802	0.0613501	0.163273	0.0555039	0.0590117	0.214794	-2.21897	down
GO:0005615	extracellular space	cellular_component	4	0.00112072	ENSSSCG00000039300	IL27	interleukin 27 [Source:NCBI gene;Acc:493187]	0.387126	0.129744	0.126177	0.125406	0.042583	0	0	0	18.046	4.17361	up
GO:0048266	behavioral response to pain	biological_process	4	0.0011918	ENSSSCG00000009735	P2RX2	purinergic receptor P2X 2 [Source:NCBI gene;Acc:100736581]	0	0.124022	0.170384	0.0845002	0	0	0	0	947.265	9.88762	up
GO:0048266	behavioral response to pain	biological_process	4	0.0011918	ENSSSCG00000013754	CACNA1A	calcium voltage-gated channel subunit alpha1 A [Source:NCBI gene;Acc:100525387]	0.02133	0.00985703	0.0134541	0.0178186	0.0498397	0.0472018	0.0284099	0.0521617	0.351662	-1.50774	down
GO:0007157	heterophilic cell-cell adhesion via plasma membrane cell adhesion molecules	biological_process	7	0.0012277	ENSSSCG00000005584	CRB2	crumbs cell polarity complex component 2 [Source:NCBI gene;Acc:100511431]	0.040431	0.018636	0.010025	0.022794	0	0	0	0.010935	8.40293	3.07089	up
GO:0007157	heterophilic cell-cell adhesion via plasma membrane cell adhesion molecules	biological_process	7	0.0012277	ENSSSCG00000014895	ENSSSCG00000014895		0.447294	2.77269	1.13723	1.15876	0	0.512435	0.137954	0.229386	6.26975	2.64841	up
GO:0007157	heterophilic cell-cell adhesion via plasma membrane cell adhesion molecules	biological_process	7	0.0012277	ENSSSCG00000037879	ENSSSCG00000037879	galectin 7 [Source:NCBI gene;Acc:100217394]	0	0	0	0	0.277325	0.040935	0	0.14385	0.000865595	-10.174	down
GO:0015269	calcium-activated potassium channel activity	molecular_function	9	0.00189884	ENSSSCG00000003069	KCNN4	potassium calcium-activated channel subfamily N member 4 [Source:NCBI gene;Acc:397081]	0	0	0.140078	0.105751	0	0	0	0	614.572	9.26344	up
GO:0015269	calcium-activated potassium channel activity	molecular_function	9	0.00189884	ENSSSCG00000010325	KCNMA1	potassium calcium-activated channel subfamily M alpha 1 [Source:NCBI gene;Acc:397434]	0.11953	0.0259335	0.020903	0.0945038	0.585101	0.119901	0.110312	0.14883	0.270572	-1.88592	down
GO:0030285	integral component of synaptic vesicle membrane	cellular_component	7	0.00231076	ENSSSCG00000001401	ENSSSCG00000001401	ATPase H+ transporting V1 subunit G2 [Source:NCBI gene;Acc:100152358]	0.076847	0.137269	0.14906	0.045167	0.263849	0.368966	0.395026	0.27871	0.312535	-1.67791	down
GO:0030285	integral component of synaptic vesicle membrane	cellular_component	7	0.00231076	ENSSSCG00000038946	SLC17A8	solute carrier family 17 member 8 [Source:NCBI gene;Acc:100526221]	0.557141	0.599388	0.741513	0.662693	0.206377	0.366996	0.426302	0.224553	2.09171	1.06469	up
GO:0001829	trophectodermal cell differentiation	biological_process	6	0.00276091	ENSSSCG00000008994	RBM46	RNA binding motif protein 46 [Source:NCBI gene;Acc:100513804]	0.226085	0.477236	0.25283	0.359355	0.129895	0.171487	0.142992	0.128662	2.29567	1.19892	up
GO:0001829	trophectodermal cell differentiation	biological_process	6	0.00276091	ENSSSCG00000031080	HAND1	heart and neural crest derivatives expressed 1 [Source:NCBI gene;Acc:541594]	0.012135	0.076182	0	0.013521	0	0	0	0	254.595	7.99206	up
GO:0015914	phospholipid transport	biological_process	8	0.00289728	ENSSSCG00000004646	ATP8B4	ATPase phospholipid transporting 8B4 (putative) [Source:NCBI gene;Acc:100154720]	0.0615731	0.45834	0.231173	1.22783	0.154983	0.170382	0.0929394	0.217412	3.11289	1.63825	up
GO:0015914	phospholipid transport	biological_process	8	0.00289728	ENSSSCG00000025681	ENSSSCG00000025681	phosphatidylcholine transfer protein [Source:NCBI gene;Acc:100621260]	0.037365	0	0	0	0	0.274144	0.278924	0.102669	0.0569817	-4.13336	down
GO:0015914	phospholipid transport	biological_process	8	0.00289728	ENSSSCG00000035421	ATP8A2	phospholipid-transporting ATPase IB [Source:NCBI gene;Acc:100523747]	0	0	0	0	0	0.106941	0	0	0.00374038	-8.0626	down
GO:0046427	positive regulation of receptor signaling pathway via JAK-STAT	biological_process	10	0.00377388	ENSSSCG00000020970	IL6	interleukin 6 [Source:NCBI gene;Acc:399500]	2.51923	2.82316	4.87588	5.13129	5.23923	6.45856	9.15744	20.8768	0.367813	-1.44296	down
GO:0046427	positive regulation of receptor signaling pathway via JAK-STAT	biological_process	10	0.00377388	ENSSSCG00000039721	PRL	prolactin [Source:NCBI gene;Acc:396965]	0	0	0	0	0.017715	0	0.066378	0.032532	0.0034298	-8.18766	down
GO:0048666	neuron development	biological_process	6	0.00420269	ENSSSCG00000014895	ENSSSCG00000014895		0.447294	2.77269	1.13723	1.15876	0	0.512435	0.137954	0.229386	6.26975	2.64841	up
GO:0048666	neuron development	biological_process	6	0.00420269	ENSSSCG00000035421	ATP8A2	phospholipid-transporting ATPase IB [Source:NCBI gene;Acc:100523747]	0	0	0	0	0	0.106941	0	0	0.00374038	-8.0626	down
GO:0048666	neuron development	biological_process	6	0.00420269	ENSSSCG00000040317	SOD2	superoxide dismutase 2 [Source:NCBI gene;Acc:100154319]	440.443	811.833	177.56	447.583	341.528	313.897	96.7074	127.848	2.13348	1.09321	up
GO:0009653	anatomical structure morphogenesis	biological_process	4	0.00493365	ENSSSCG00000002658	FOXL1	forkhead box L1 [Source:NCBI gene;Acc:100511634]	1.09758	0.23386	0.197345	0.099179	0.024694	0	0.053966	0.20144	5.81208	2.53905	up
GO:0009653	anatomical structure morphogenesis	biological_process	4	0.00493365	ENSSSCG00000004540	ONECUT2	one cut homeobox 2 [Source:NCBI gene;Acc:106507181]	0	0	0	0	0	0.043783	0.033285	0.013458	0.00441862	-7.82219	down
GO:0051924	regulation of calcium ion transport	biological_process	9	0.00493365	ENSSSCG00000029651	SLN	sarcolipin [Source:NCBI gene;Acc:733627]	0.037571	0	0.047445	0.08046	0.377891	0.210467	0.117272	0.131093	0.197767	-2.33813	down
GO:0051924	regulation of calcium ion transport	biological_process	9	0.00493365	ENSSSCG00000034163	PLN	phospholamban [Source:NCBI gene;Acc:397421]	1.31763	0.663593	1.79408	2.5748	6.43865	2.88279	3.72296	8.02146	0.301441	-1.73005	down
GO:0007507	heart development	biological_process	6	0.00565623	ENSSSCG00000002658	FOXL1	forkhead box L1 [Source:NCBI gene;Acc:100511634]	1.09758	0.23386	0.197345	0.099179	0.024694	0	0.053966	0.20144	5.81208	2.53905	up
GO:0007507	heart development	biological_process	6	0.00565623	ENSSSCG00000031080	HAND1	heart and neural crest derivatives expressed 1 [Source:NCBI gene;Acc:541594]	0.012135	0.076182	0	0.013521	0	0	0	0	254.595	7.99206	up
GO:0007507	heart development	biological_process	6	0.00565623	ENSSSCG00000037457	HSPB7	heat shock protein family B (small) member 7 [Source:NCBI gene;Acc:100627988]	0.139649	0.020884	0.065506	0	1.15429	0.069848	0.043008	0.206936	0.153342	-2.70517	down
GO:0007507	heart development	biological_process	6	0.00565623	ENSSSCG00000040317	SOD2	superoxide dismutase 2 [Source:NCBI gene;Acc:100154319]	440.443	811.833	177.56	447.583	341.528	313.897	96.7074	127.848	2.13348	1.09321	up
GO:0007507	heart development	biological_process	6	0.00565623	ENSSSCG00000040746	LRP2	LDL receptor related protein 2 [Source:NCBI gene;Acc:100519689]	0.295167	0.701586	0.542765	0.959293	0.184023	0.427094	0.234247	0.380174	2.03895	1.02783	up
GO:0021590	cerebellum maturation	biological_process	6	0.00664043	ENSSSCG00000013754	CACNA1A	calcium voltage-gated channel subunit alpha1 A [Source:NCBI gene;Acc:100525387]	0.02133	0.00985703	0.0134541	0.0178186	0.0498397	0.0472018	0.0284099	0.0521617	0.351662	-1.50774	down
GO:0055111	ingression involved in gastrulation with mouth forming second	biological_process	9	0.00664043	ENSSSCG00000005584	CRB2	crumbs cell polarity complex component 2 [Source:NCBI gene;Acc:100511431]	0.040431	0.018636	0.010025	0.022794	0	0	0	0.010935	8.40293	3.07089	up
GO:0003011	involuntary skeletal muscle contraction	biological_process	9	0.00664043	ENSSSCG00000035421	ATP8A2	phospholipid-transporting ATPase IB [Source:NCBI gene;Acc:100523747]	0	0	0	0	0	0.106941	0	0	0.00374038	-8.0626	down
GO:1901894	regulation of calcium-transporting ATPase activity	biological_process	9	0.00664043	ENSSSCG00000034163	PLN	phospholamban [Source:NCBI gene;Acc:397421]	1.31763	0.663593	1.79408	2.5748	6.43865	2.88279	3.72296	8.02146	0.301441	-1.73005	down
GO:2001213	negative regulation of vasculogenesis	biological_process	8	0.00664043	ENSSSCG00000008522	XDH	xanthine dehydrogenase [Source:NCBI gene;Acc:100515259]	0.252166	0.115657	0.157807	0.298556	0.0307525	0.0547913	0.0339726	0.0307205	5.48591	2.45573	up
GO:2000212	negative regulation of glutamate metabolic process	biological_process	10	0.00664043	ENSSSCG00000026754	ATCAY	ATCAY, caytaxin [Source:NCBI gene;Acc:100626830]	0	0	0	0	0.089454	0	0.032815	0.015637	0.00290053	-8.42947	down
GO:1990136	linoleate 9S-lipoxygenase activity	molecular_function	7	0.00664043	ENSSSCG00000017980	ALOX12B	arachidonate 12-lipoxygenase, 12R type [Source:NCBI gene;Acc:100526246]	0	0	0	0.023422	0.112108	0.169971	0.046735	0.163495	0.0475758	-4.39363	down
GO:0010712	regulation of collagen metabolic process	biological_process	6	0.00664043	ENSSSCG00000036007	MFAP4	microfibril associated protein 4 [Source:NCBI gene;Acc:110256120]	0.672427	0.116995	0.027877	0.053744	2.46429	0.02652	0.026398	2.87465	0.161548	-2.62997	down
GO:0014056	regulation of acetylcholine secretion, neurotransmission	biological_process	10	0.00664043	ENSSSCG00000013754	CACNA1A	calcium voltage-gated channel subunit alpha1 A [Source:NCBI gene;Acc:100525387]	0.02133	0.00985703	0.0134541	0.0178186	0.0498397	0.0472018	0.0284099	0.0521617	0.351662	-1.50774	down
GO:0048773	erythrophore differentiation	biological_process	7	0.00664043	ENSSSCG00000040317	SOD2	superoxide dismutase 2 [Source:NCBI gene;Acc:100154319]	440.443	811.833	177.56	447.583	341.528	313.897	96.7074	127.848	2.13348	1.09321	up
GO:0007495	visceral mesoderm-endoderm interaction involved in midgut development	biological_process	6	0.00664043	ENSSSCG00000002658	FOXL1	forkhead box L1 [Source:NCBI gene;Acc:100511634]	1.09758	0.23386	0.197345	0.099179	0.024694	0	0.053966	0.20144	5.81208	2.53905	up
GO:1901877	negative regulation of calcium ion binding	biological_process	7	0.00664043	ENSSSCG00000034163	PLN	phospholamban [Source:NCBI gene;Acc:397421]	1.31763	0.663593	1.79408	2.5748	6.43865	2.88279	3.72296	8.02146	0.301441	-1.73005	down
GO:0032353	negative regulation of hormone biosynthetic process	biological_process	9	0.00664043	ENSSSCG00000013754	CACNA1A	calcium voltage-gated channel subunit alpha1 A [Source:NCBI gene;Acc:100525387]	0.02133	0.00985703	0.0134541	0.0178186	0.0498397	0.0472018	0.0284099	0.0521617	0.351662	-1.50774	down
GO:0006147	guanine catabolic process	biological_process	11	0.00664043	ENSSSCG00000034919	GDA	guanine deaminase [Source:NCBI gene;Acc:100621043]	0	0.044769	0.063896	0.072535	0	0	0	0.009402	19.2725	4.26847	up
GO:0021679	cerebellar molecular layer development	biological_process	5	0.00664043	ENSSSCG00000013754	CACNA1A	calcium voltage-gated channel subunit alpha1 A [Source:NCBI gene;Acc:100525387]	0.02133	0.00985703	0.0134541	0.0178186	0.0498397	0.0472018	0.0284099	0.0521617	0.351662	-1.50774	down
GO:1901020	negative regulation of calcium ion transmembrane transporter activity	biological_process	8	0.00664043	ENSSSCG00000034163	PLN	phospholamban [Source:NCBI gene;Acc:397421]	1.31763	0.663593	1.79408	2.5748	6.43865	2.88279	3.72296	8.02146	0.301441	-1.73005	down
GO:0086023	adenylate cyclase-activating adrenergic receptor signaling pathway involved in heart process	biological_process	10	0.00664043	ENSSSCG00000034163	PLN	phospholamban [Source:NCBI gene;Acc:397421]	1.31763	0.663593	1.79408	2.5748	6.43865	2.88279	3.72296	8.02146	0.301441	-1.73005	down
GO:0050135	NAD(P)+ nucleosidase activity	molecular_function	7	0.00664043	ENSSSCG00000008742	CD38	CD38 molecule [Source:NCBI gene;Acc:100511702]	3.70184	3.39609	0.812398	2.31241	1.78349	1.58737	0.572801	0.953064	2.08767	1.06189	up
GO:1901895	negative regulation of calcium-transporting ATPase activity	biological_process	9	0.00664043	ENSSSCG00000034163	PLN	phospholamban [Source:NCBI gene;Acc:397421]	1.31763	0.663593	1.79408	2.5748	6.43865	2.88279	3.72296	8.02146	0.301441	-1.73005	down
GO:0090534	calcium ion-transporting ATPase complex	cellular_component	8	0.00664043	ENSSSCG00000034163	PLN	phospholamban [Source:NCBI gene;Acc:397421]	1.31763	0.663593	1.79408	2.5748	6.43865	2.88279	3.72296	8.02146	0.301441	-1.73005	down
GO:0061501	cyclic-GMP-AMP synthase activity	molecular_function	7	0.00664043	ENSSSCG00000021383	CGAS	cyclic GMP-AMP synthase [Source:NCBI gene;Acc:100516408]	0.211824	0.107048	0	0.176027	0.675164	0.29819	0.213437	0.677419	0.265474	-1.91336	down
GO:0070255	regulation of mucus secretion	biological_process	6	0.00664043	ENSSSCG00000014561	NLRP6	NLR family pyrin domain containing 6 [Source:NCBI gene;Acc:100519245]	0.104384	0.039459	0.016589	0.052776	0.51811	0.05228	0.071686	0.125618	0.277725	-1.84827	down
GO:0003069	acetylcholine-mediated vasodilation involved in regulation of systemic arterial blood pressure	biological_process	8	0.00664043	ENSSSCG00000040317	SOD2	superoxide dismutase 2 [Source:NCBI gene;Acc:100154319]	440.443	811.833	177.56	447.583	341.528	313.897	96.7074	127.848	2.13348	1.09321	up
GO:0003032	detection of oxygen	biological_process	6	0.00664043	ENSSSCG00000040317	SOD2	superoxide dismutase 2 [Source:NCBI gene;Acc:100154319]	440.443	811.833	177.56	447.583	341.528	313.897	96.7074	127.848	2.13348	1.09321	up
GO:0002384	hepatic immune response	biological_process	6	0.00664043	ENSSSCG00000020970	IL6	interleukin 6 [Source:NCBI gene;Acc:399500]	2.51923	2.82316	4.87588	5.13129	5.23923	6.45856	9.15744	20.8768	0.367813	-1.44296	down
GO:0031335	regulation of sulfur amino acid metabolic process	biological_process	9	0.00664043	ENSSSCG00000013754	CACNA1A	calcium voltage-gated channel subunit alpha1 A [Source:NCBI gene;Acc:100525387]	0.02133	0.00985703	0.0134541	0.0178186	0.0498397	0.0472018	0.0284099	0.0521617	0.351662	-1.50774	down
GO:0022894	Intermediate conductance calcium-activated potassium channel activity	molecular_function	10	0.00664043	ENSSSCG00000003069	KCNN4	potassium calcium-activated channel subfamily N member 4 [Source:NCBI gene;Acc:397081]	0	0	0.140078	0.105751	0	0	0	0	614.572	9.26344	up
GO:0070447	positive regulation of oligodendrocyte progenitor proliferation	biological_process	11	0.00664043	ENSSSCG00000040746	LRP2	LDL receptor related protein 2 [Source:NCBI gene;Acc:100519689]	0.295167	0.701586	0.542765	0.959293	0.184023	0.427094	0.234247	0.380174	2.03895	1.02783	up
GO:0001781	neutrophil apoptotic process	biological_process	8	0.00664043	ENSSSCG00000020970	IL6	interleukin 6 [Source:NCBI gene;Acc:399500]	2.51923	2.82316	4.87588	5.13129	5.23923	6.45856	9.15744	20.8768	0.367813	-1.44296	down
GO:0008892	guanine deaminase activity	molecular_function	7	0.00664043	ENSSSCG00000034919	GDA	guanine deaminase [Source:NCBI gene;Acc:100621043]	0	0.044769	0.063896	0.072535	0	0	0	0.009402	19.2725	4.26847	up
GO:0055093	response to hyperoxia	biological_process	5	0.00664043	ENSSSCG00000040317	SOD2	superoxide dismutase 2 [Source:NCBI gene;Acc:100154319]	440.443	811.833	177.56	447.583	341.528	313.897	96.7074	127.848	2.13348	1.09321	up
GO:0021528	commissural neuron differentiation in spinal cord	biological_process	7	0.00664043	ENSSSCG00000003423	DRAXIN	dorsal inhibitory axon guidance protein [Source:NCBI gene;Acc:100524629]	0.00774	0.008041	0.015319	0.025872	0	0	0	0	142.43	7.15411	up
GO:0003029	detection of hypoxic conditions in blood by carotid body chemoreceptor signaling	biological_process	7	0.00664043	ENSSSCG00000009735	P2RX2	purinergic receptor P2X 2 [Source:NCBI gene;Acc:100736581]	0	0.124022	0.170384	0.0845002	0	0	0	0	947.265	9.88762	up
GO:0006766	vitamin metabolic process	biological_process	5	0.00664043	ENSSSCG00000040746	LRP2	LDL receptor related protein 2 [Source:NCBI gene;Acc:100519689]	0.295167	0.701586	0.542765	0.959293	0.184023	0.427094	0.234247	0.380174	2.03895	1.02783	up
GO:0004855	xanthine oxidase activity	molecular_function	7	0.00664043	ENSSSCG00000008522	XDH	xanthine dehydrogenase [Source:NCBI gene;Acc:100515259]	0.252166	0.115657	0.157807	0.298556	0.0307525	0.0547913	0.0339726	0.0307205	5.48591	2.45573	up
GO:0034465	response to carbon monoxide	biological_process	6	0.00664043	ENSSSCG00000010325	KCNMA1	potassium calcium-activated channel subfamily M alpha 1 [Source:NCBI gene;Acc:397434]	0.11953	0.0259335	0.020903	0.0945038	0.585101	0.119901	0.110312	0.14883	0.270572	-1.88592	down
GO:0045625	regulation of T-helper 1 cell differentiation	biological_process	10	0.00664043	ENSSSCG00000039300	IL27	interleukin 27 [Source:NCBI gene;Acc:493187]	0.387126	0.129744	0.126177	0.125406	0.042583	0	0	0	18.046	4.17361	up
GO:0003144	embryonic heart tube formation	biological_process	8	0.00664043	ENSSSCG00000031080	HAND1	heart and neural crest derivatives expressed 1 [Source:NCBI gene;Acc:541594]	0.012135	0.076182	0	0.013521	0	0	0	0	254.595	7.99206	up
GO:0002230	positive regulation of defense response to virus by host	biological_process	9	0.00693989	ENSSSCG00000021383	CGAS	cyclic GMP-AMP synthase [Source:NCBI gene;Acc:100516408]	0.211824	0.107048	0	0.176027	0.675164	0.29819	0.213437	0.677419	0.265474	-1.91336	down
GO:0002230	positive regulation of defense response to virus by host	biological_process	9	0.00693989	ENSSSCG00000039300	IL27	interleukin 27 [Source:NCBI gene;Acc:493187]	0.387126	0.129744	0.126177	0.125406	0.042583	0	0	0	18.046	4.17361	up
GO:0043113	receptor clustering	biological_process	6	0.00767776	ENSSSCG00000000257	ITGB7	integrin subunit beta 7 [Source:NCBI gene;Acc:397221]	0.185201	0.227381	0.35861	0.515071	0.180725	0.12515	0.146028	0.18352	2.02426	1.01739	up
GO:0043113	receptor clustering	biological_process	6	0.00767776	ENSSSCG00000013754	CACNA1A	calcium voltage-gated channel subunit alpha1 A [Source:NCBI gene;Acc:100525387]	0.02133	0.00985703	0.0134541	0.0178186	0.0498397	0.0472018	0.0284099	0.0521617	0.351662	-1.50774	down
GO:0004012	phospholipid-translocating ATPase activity	molecular_function	6	0.00925435	ENSSSCG00000004646	ATP8B4	ATPase phospholipid transporting 8B4 (putative) [Source:NCBI gene;Acc:100154720]	0.0615731	0.45834	0.231173	1.22783	0.154983	0.170382	0.0929394	0.217412	3.11289	1.63825	up
GO:0004012	phospholipid-translocating ATPase activity	molecular_function	6	0.00925435	ENSSSCG00000035421	ATP8A2	phospholipid-transporting ATPase IB [Source:NCBI gene;Acc:100523747]	0	0	0	0	0	0.106941	0	0	0.00374038	-8.0626	down
GO:0022900	electron transport chain	biological_process	6	0.010027	ENSSSCG00000004670	C15orf48	chromosome 1 C15orf48 homolog [Source:NCBI gene;Acc:100152534]	3.80373	7.49925	2.12086	2.42394	1.83959	2.25668	1.19419	1.0024	2.51838	1.3325	up
GO:0022900	electron transport chain	biological_process	6	0.010027	ENSSSCG00000008522	XDH	xanthine dehydrogenase [Source:NCBI gene;Acc:100515259]	0.252166	0.115657	0.157807	0.298556	0.0307525	0.0547913	0.0339726	0.0307205	5.48591	2.45573	up
GO:0022900	electron transport chain	biological_process	6	0.010027	ENSSSCG00000035727	SURF1	surfeit locus protein 1 [Source:NCBI gene;Acc:110256505]	0.794258	1.0833	1.13023	0.666506	1.04102	2.86432	6.53336	7.01648	0.210499	-2.24811	down
GO:1902600	proton transmembrane transport	biological_process	9	0.0117373	ENSSSCG00000001401	ENSSSCG00000001401	ATPase H+ transporting V1 subunit G2 [Source:NCBI gene;Acc:100152358]	0.076847	0.137269	0.14906	0.045167	0.263849	0.368966	0.395026	0.27871	0.312535	-1.67791	down
GO:1902600	proton transmembrane transport	biological_process	9	0.0117373	ENSSSCG00000004670	C15orf48	chromosome 1 C15orf48 homolog [Source:NCBI gene;Acc:100152534]	3.80373	7.49925	2.12086	2.42394	1.83959	2.25668	1.19419	1.0024	2.51838	1.3325	up
GO:1902600	proton transmembrane transport	biological_process	9	0.0117373	ENSSSCG00000035727	SURF1	surfeit locus protein 1 [Source:NCBI gene;Acc:110256505]	0.794258	1.0833	1.13023	0.666506	1.04102	2.86432	6.53336	7.01648	0.210499	-2.24811	down
GO:0001937	negative regulation of endothelial cell proliferation	biological_process	9	0.0118643	ENSSSCG00000008522	XDH	xanthine dehydrogenase [Source:NCBI gene;Acc:100515259]	0.252166	0.115657	0.157807	0.298556	0.0307525	0.0547913	0.0339726	0.0307205	5.48591	2.45573	up
GO:0001937	negative regulation of endothelial cell proliferation	biological_process	9	0.0118643	ENSSSCG00000039721	PRL	prolactin [Source:NCBI gene;Acc:396965]	0	0	0	0	0.017715	0	0.066378	0.032532	0.0034298	-8.18766	down
GO:0007274	neuromuscular synaptic transmission	biological_process	10	0.0118643	ENSSSCG00000009735	P2RX2	purinergic receptor P2X 2 [Source:NCBI gene;Acc:100736581]	0	0.124022	0.170384	0.0845002	0	0	0	0	947.265	9.88762	up
GO:0007274	neuromuscular synaptic transmission	biological_process	10	0.0118643	ENSSSCG00000013754	CACNA1A	calcium voltage-gated channel subunit alpha1 A [Source:NCBI gene;Acc:100525387]	0.02133	0.00985703	0.0134541	0.0178186	0.0498397	0.0472018	0.0284099	0.0521617	0.351662	-1.50774	down
GO:0004129	cytochrome-c oxidase activity	molecular_function	6	0.0118643	ENSSSCG00000004670	C15orf48	chromosome 1 C15orf48 homolog [Source:NCBI gene;Acc:100152534]	3.80373	7.49925	2.12086	2.42394	1.83959	2.25668	1.19419	1.0024	2.51838	1.3325	up
GO:0004129	cytochrome-c oxidase activity	molecular_function	6	0.0118643	ENSSSCG00000035727	SURF1	surfeit locus protein 1 [Source:NCBI gene;Acc:110256505]	0.794258	1.0833	1.13023	0.666506	1.04102	2.86432	6.53336	7.01648	0.210499	-2.24811	down
GO:1901588	dendritic microtubule	cellular_component	8	0.0132372	ENSSSCG00000016022	ZNF804A	zinc finger protein 804A [Source:NCBI gene;Acc:100524346]	0.0553859	0.12664	0.189437	0.0925699	0.0276792	0.047276	0.056554	0.0325941	2.82769	1.49962	up
GO:0014719	skeletal muscle satellite cell activation	biological_process	5	0.0132372	ENSSSCG00000024492	EPHB1	EPH receptor B1 [Source:NCBI gene;Acc:100524585]	0.040072	0.135855	0.125182	0.079682	0.16303	0.106112	0.412634	0.215447	0.424411	-1.23647	down
GO:0003953	NAD+ nucleosidase activity	molecular_function	7	0.0132372	ENSSSCG00000008742	CD38	CD38 molecule [Source:NCBI gene;Acc:100511702]	3.70184	3.39609	0.812398	2.31241	1.78349	1.58737	0.572801	0.953064	2.08767	1.06189	up
GO:0004052	arachidonate 12-lipoxygenase activity	molecular_function	7	0.0132372	ENSSSCG00000017980	ALOX12B	arachidonate 12-lipoxygenase, 12R type [Source:NCBI gene;Acc:100526246]	0	0	0	0.023422	0.112108	0.169971	0.046735	0.163495	0.0475758	-4.39363	down
GO:0032966	negative regulation of collagen biosynthetic process	biological_process	8	0.0132372	ENSSSCG00000020970	IL6	interleukin 6 [Source:NCBI gene;Acc:399500]	2.51923	2.82316	4.87588	5.13129	5.23923	6.45856	9.15744	20.8768	0.367813	-1.44296	down
GO:0060072	large conductance calcium-activated potassium channel activity	molecular_function	10	0.0132372	ENSSSCG00000010325	KCNMA1	potassium calcium-activated channel subfamily M alpha 1 [Source:NCBI gene;Acc:397434]	0.11953	0.0259335	0.020903	0.0945038	0.585101	0.119901	0.110312	0.14883	0.270572	-1.88592	down
GO:0086092	regulation of the force of heart contraction by cardiac conduction	biological_process	10	0.0132372	ENSSSCG00000034163	PLN	phospholamban [Source:NCBI gene;Acc:397421]	1.31763	0.663593	1.79408	2.5748	6.43865	2.88279	3.72296	8.02146	0.301441	-1.73005	down
GO:0070352	positive regulation of white fat cell proliferation	biological_process	9	0.0132372	ENSSSCG00000015636	VSTM2A	V-set and transmembrane domain containing 2A [Source:NCBI gene;Acc:100517233]	0	0	0	0	0.259666	0	0	0	0.00154044	-9.34244	down
GO:1902632	positive regulation of membrane hyperpolarization	biological_process	6	0.0132372	ENSSSCG00000010325	KCNMA1	potassium calcium-activated channel subfamily M alpha 1 [Source:NCBI gene;Acc:397434]	0.11953	0.0259335	0.020903	0.0945038	0.585101	0.119901	0.110312	0.14883	0.270572	-1.88592	down
GO:0002675	positive regulation of acute inflammatory response	biological_process	10	0.0132372	ENSSSCG00000020970	IL6	interleukin 6 [Source:NCBI gene;Acc:399500]	2.51923	2.82316	4.87588	5.13129	5.23923	6.45856	9.15744	20.8768	0.367813	-1.44296	down
GO:0030644	cellular chloride ion homeostasis	biological_process	11	0.0132372	ENSSSCG00000013754	CACNA1A	calcium voltage-gated channel subunit alpha1 A [Source:NCBI gene;Acc:100525387]	0.02133	0.00985703	0.0134541	0.0178186	0.0498397	0.0472018	0.0284099	0.0521617	0.351662	-1.50774	down
GO:0003218	cardiac left ventricle formation	biological_process	7	0.0132372	ENSSSCG00000031080	HAND1	heart and neural crest derivatives expressed 1 [Source:NCBI gene;Acc:541594]	0.012135	0.076182	0	0.013521	0	0	0	0	254.595	7.99206	up
GO:1901077	regulation of relaxation of muscle	biological_process	8	0.0132372	ENSSSCG00000034163	PLN	phospholamban [Source:NCBI gene;Acc:397421]	1.31763	0.663593	1.79408	2.5748	6.43865	2.88279	3.72296	8.02146	0.301441	-1.73005	down
GO:0021750	vestibular nucleus development	biological_process	6	0.0132372	ENSSSCG00000013754	CACNA1A	calcium voltage-gated channel subunit alpha1 A [Source:NCBI gene;Acc:100525387]	0.02133	0.00985703	0.0134541	0.0178186	0.0498397	0.0472018	0.0284099	0.0521617	0.351662	-1.50774	down
GO:0010753	positive regulation of cGMP-mediated signaling	biological_process	10	0.0132372	ENSSSCG00000021383	CGAS	cyclic GMP-AMP synthase [Source:NCBI gene;Acc:100516408]	0.211824	0.107048	0	0.176027	0.675164	0.29819	0.213437	0.677419	0.265474	-1.91336	down
GO:1902412	regulation of mitotic cytokinesis	biological_process	8	0.0132372	ENSSSCG00000031976	ANKRD53	ankyrin repeat domain 53 [Source:NCBI gene;Acc:100739578]	0.0842339	0	0.0529971	0	0	0	0	0	343.078	8.42239	up
GO:0061092	positive regulation of phospholipid translocation	biological_process	8	0.0132372	ENSSSCG00000035421	ATP8A2	phospholipid-transporting ATPase IB [Source:NCBI gene;Acc:100523747]	0	0	0	0	0	0.106941	0	0	0.00374038	-8.0626	down
GO:0071228	cellular response to tumor cell	biological_process	6	0.0132372	ENSSSCG00000005360	IGFBPL1	insulin like growth factor binding protein like 1 [Source:NCBI gene;Acc:100155070]	0	0	0	0	0.02466	0	0.022178	0.037632	0.00473541	-7.7223	down
GO:0060073	micturition	biological_process	6	0.0132372	ENSSSCG00000010325	KCNMA1	potassium calcium-activated channel subfamily M alpha 1 [Source:NCBI gene;Acc:397434]	0.11953	0.0259335	0.020903	0.0945038	0.585101	0.119901	0.110312	0.14883	0.270572	-1.88592	down
GO:0034669	integrin alpha4-beta7 complex	cellular_component	6	0.0132372	ENSSSCG00000000257	ITGB7	integrin subunit beta 7 [Source:NCBI gene;Acc:397221]	0.185201	0.227381	0.35861	0.515071	0.180725	0.12515	0.146028	0.18352	2.02426	1.01739	up
GO:0099626	voltage-gated calcium channel activity involved in regulation of presynaptic cytosolic calcium levels	molecular_function	11	0.0132372	ENSSSCG00000013754	CACNA1A	calcium voltage-gated channel subunit alpha1 A [Source:NCBI gene;Acc:100525387]	0.02133	0.00985703	0.0134541	0.0178186	0.0498397	0.0472018	0.0284099	0.0521617	0.351662	-1.50774	down
GO:0001306	age-dependent response to oxidative stress	biological_process	6	0.0132372	ENSSSCG00000040317	SOD2	superoxide dismutase 2 [Source:NCBI gene;Acc:100154319]	440.443	811.833	177.56	447.583	341.528	313.897	96.7074	127.848	2.13348	1.09321	up
GO:0060083	smooth muscle contraction involved in micturition	biological_process	10	0.0132372	ENSSSCG00000010325	KCNMA1	potassium calcium-activated channel subfamily M alpha 1 [Source:NCBI gene;Acc:397434]	0.11953	0.0259335	0.020903	0.0945038	0.585101	0.119901	0.110312	0.14883	0.270572	-1.88592	down
GO:0031282	regulation of guanylate cyclase activity	biological_process	7	0.0132372	ENSSSCG00000001636	GUCA1A	guanylate cyclase activator 1A [Source:NCBI gene;Acc:100739200]	0.062988	0.164763	0.236424	0.111331	0.353288	0.30342	0.380666	0.222057	0.456957	-1.12987	down
GO:0009743	response to carbohydrate	biological_process	6	0.0132372	ENSSSCG00000009735	P2RX2	purinergic receptor P2X 2 [Source:NCBI gene;Acc:100736581]	0	0.124022	0.170384	0.0845002	0	0	0	0	947.265	9.88762	up
GO:0140058	neuron projection arborization	biological_process	9	0.0132372	ENSSSCG00000040746	LRP2	LDL receptor related protein 2 [Source:NCBI gene;Acc:100519689]	0.295167	0.701586	0.542765	0.959293	0.184023	0.427094	0.234247	0.380174	2.03895	1.02783	up
GO:0003366	cell-matrix adhesion involved in ameboidal cell migration	biological_process	7	0.0132372	ENSSSCG00000000257	ITGB7	integrin subunit beta 7 [Source:NCBI gene;Acc:397221]	0.185201	0.227381	0.35861	0.515071	0.180725	0.12515	0.146028	0.18352	2.02426	1.01739	up
GO:0030249	guanylate cyclase regulator activity	molecular_function	6	0.0132372	ENSSSCG00000001636	GUCA1A	guanylate cyclase activator 1A [Source:NCBI gene;Acc:100739200]	0.062988	0.164763	0.236424	0.111331	0.353288	0.30342	0.380666	0.222057	0.456957	-1.12987	down
GO:0008048	calcium sensitive guanylate cyclase activator activity	molecular_function	7	0.0132372	ENSSSCG00000001636	GUCA1A	guanylate cyclase activator 1A [Source:NCBI gene;Acc:100739200]	0.062988	0.164763	0.236424	0.111331	0.353288	0.30342	0.380666	0.222057	0.456957	-1.12987	down
GO:0061146	Peyer's patch morphogenesis	biological_process	6	0.0132372	ENSSSCG00000002658	FOXL1	forkhead box L1 [Source:NCBI gene;Acc:100511634]	1.09758	0.23386	0.197345	0.099179	0.024694	0	0.053966	0.20144	5.81208	2.53905	up
GO:0060024	rhythmic synaptic transmission	biological_process	9	0.0132372	ENSSSCG00000013754	CACNA1A	calcium voltage-gated channel subunit alpha1 A [Source:NCBI gene;Acc:100525387]	0.02133	0.00985703	0.0134541	0.0178186	0.0498397	0.0472018	0.0284099	0.0521617	0.351662	-1.50774	down
GO:0010469	regulation of signaling receptor activity	biological_process	8	0.0132432	ENSSSCG00000005214	INSL6	insulin like 6 [Source:NCBI gene;Acc:100158105]	0	0	0	0	0.309859	0.19965	0.377705	0	0.00045085	-11.1151	down
GO:0010469	regulation of signaling receptor activity	biological_process	8	0.0132432	ENSSSCG00000020970	IL6	interleukin 6 [Source:NCBI gene;Acc:399500]	2.51923	2.82316	4.87588	5.13129	5.23923	6.45856	9.15744	20.8768	0.367813	-1.44296	down
GO:0010469	regulation of signaling receptor activity	biological_process	8	0.0132432	ENSSSCG00000026695	TNFSF14	TNF superfamily member 14 [Source:NCBI gene;Acc:100519468]	0.056141	0	0.20312	0.057648	0	0	0	0	792.273	9.62985	up
GO:0010469	regulation of signaling receptor activity	biological_process	8	0.0132432	ENSSSCG00000031022	IFN-DELTA-7	interferon delta 7 [Source:NCBI gene;Acc:100303727]	0.262573	0.106276	0.0713	0.396111	0	0	0	0	2090.65	11.0297	up
GO:0010469	regulation of signaling receptor activity	biological_process	8	0.0132432	ENSSSCG00000037684	PDYN	prodynorphin [Source:NCBI gene;Acc:445529]	1.54458	1.47723	2.49974	1.41827	2.6421	22.0147	1.64546	2.12709	0.244107	-2.03441	down
GO:0010469	regulation of signaling receptor activity	biological_process	8	0.0132432	ENSSSCG00000039721	PRL	prolactin [Source:NCBI gene;Acc:396965]	0	0	0	0	0.017715	0	0.066378	0.032532	0.0034298	-8.18766	down
GO:0006816	calcium ion transport	biological_process	10	0.0167081	ENSSSCG00000003069	KCNN4	potassium calcium-activated channel subfamily N member 4 [Source:NCBI gene;Acc:397081]	0	0	0.140078	0.105751	0	0	0	0	614.572	9.26344	up
GO:0006816	calcium ion transport	biological_process	10	0.0167081	ENSSSCG00000013754	CACNA1A	calcium voltage-gated channel subunit alpha1 A [Source:NCBI gene;Acc:100525387]	0.02133	0.00985703	0.0134541	0.0178186	0.0498397	0.0472018	0.0284099	0.0521617	0.351662	-1.50774	down
GO:0006816	calcium ion transport	biological_process	10	0.0167081	ENSSSCG00000034163	PLN	phospholamban [Source:NCBI gene;Acc:397421]	1.31763	0.663593	1.79408	2.5748	6.43865	2.88279	3.72296	8.02146	0.301441	-1.73005	down
GO:0007017	microtubule-based process	biological_process	4	0.0168373	ENSSSCG00000010103	ENSSSCG00000010103	tubulin alpha-3 chain [Source:NCBI gene;Acc:100155138]	0.107222	0.227949	0.129334	0.240343	0	0.068874	0	0.042865	6.30799	2.65718	up
GO:0007017	microtubule-based process	biological_process	4	0.0168373	ENSSSCG00000029077	TUBAL3	tubulin alpha like 3 [Source:NCBI gene;Acc:100623355]	0.007797	0.03003	0.008833	0.019154	0.076438	0.038824	0.057903	0.048124	0.297412	-1.74947	down
GO:0001707	mesoderm formation	biological_process	6	0.0179214	ENSSSCG00000005584	CRB2	crumbs cell polarity complex component 2 [Source:NCBI gene;Acc:100511431]	0.040431	0.018636	0.010025	0.022794	0	0	0	0.010935	8.40293	3.07089	up
GO:0001707	mesoderm formation	biological_process	6	0.0179214	ENSSSCG00000031080	HAND1	heart and neural crest derivatives expressed 1 [Source:NCBI gene;Acc:541594]	0.012135	0.076182	0	0.013521	0	0	0	0	254.595	7.99206	up
GO:0043235	receptor complex	cellular_component	4	0.0189828	ENSSSCG00000000257	ITGB7	integrin subunit beta 7 [Source:NCBI gene;Acc:397221]	0.185201	0.227381	0.35861	0.515071	0.180725	0.12515	0.146028	0.18352	2.02426	1.01739	up
GO:0043235	receptor complex	cellular_component	4	0.0189828	ENSSSCG00000009735	P2RX2	purinergic receptor P2X 2 [Source:NCBI gene;Acc:100736581]	0	0.124022	0.170384	0.0845002	0	0	0	0	947.265	9.88762	up
GO:0043235	receptor complex	cellular_component	4	0.0189828	ENSSSCG00000024492	EPHB1	EPH receptor B1 [Source:NCBI gene;Acc:100524585]	0.040072	0.135855	0.125182	0.079682	0.16303	0.106112	0.412634	0.215447	0.424411	-1.23647	down
GO:0043235	receptor complex	cellular_component	4	0.0189828	ENSSSCG00000040746	LRP2	LDL receptor related protein 2 [Source:NCBI gene;Acc:100519689]	0.295167	0.701586	0.542765	0.959293	0.184023	0.427094	0.234247	0.380174	2.03895	1.02783	up
GO:0050853	B cell receptor signaling pathway	biological_process	8	0.0190343	ENSSSCG00000008742	CD38	CD38 molecule [Source:NCBI gene;Acc:100511702]	3.70184	3.39609	0.812398	2.31241	1.78349	1.58737	0.572801	0.953064	2.08767	1.06189	up
GO:0050853	B cell receptor signaling pathway	biological_process	8	0.0190343	ENSSSCG00000012137	BMX	BMX non-receptor tyrosine kinase [Source:NCBI gene;Acc:100516528]	0.470346	0.451285	0.546133	1.00719	1.1298	0.604344	0.774901	3.02998	0.446821	-1.16223	down
GO:0016324	apical plasma membrane	cellular_component	5	0.019392	ENSSSCG00000005584	CRB2	crumbs cell polarity complex component 2 [Source:NCBI gene;Acc:100511431]	0.040431	0.018636	0.010025	0.022794	0	0	0	0.010935	8.40293	3.07089	up
GO:0016324	apical plasma membrane	cellular_component	5	0.019392	ENSSSCG00000009735	P2RX2	purinergic receptor P2X 2 [Source:NCBI gene;Acc:100736581]	0	0.124022	0.170384	0.0845002	0	0	0	0	947.265	9.88762	up
GO:0016324	apical plasma membrane	cellular_component	5	0.019392	ENSSSCG00000010325	KCNMA1	potassium calcium-activated channel subfamily M alpha 1 [Source:NCBI gene;Acc:397434]	0.11953	0.0259335	0.020903	0.0945038	0.585101	0.119901	0.110312	0.14883	0.270572	-1.88592	down
GO:0016324	apical plasma membrane	cellular_component	5	0.019392	ENSSSCG00000040746	LRP2	LDL receptor related protein 2 [Source:NCBI gene;Acc:100519689]	0.295167	0.701586	0.542765	0.959293	0.184023	0.427094	0.234247	0.380174	2.03895	1.02783	up
GO:0050883	musculoskeletal movement, spinal reflex action	biological_process	6	0.0197905	ENSSSCG00000013754	CACNA1A	calcium voltage-gated channel subunit alpha1 A [Source:NCBI gene;Acc:100525387]	0.02133	0.00985703	0.0134541	0.0178186	0.0498397	0.0472018	0.0284099	0.0521617	0.351662	-1.50774	down
GO:0045523	interleukin-27 receptor binding	molecular_function	7	0.0197905	ENSSSCG00000039300	IL27	interleukin 27 [Source:NCBI gene;Acc:493187]	0.387126	0.129744	0.126177	0.125406	0.042583	0	0	0	18.046	4.17361	up
GO:0046541	saliva secretion	biological_process	8	0.0197905	ENSSSCG00000003069	KCNN4	potassium calcium-activated channel subfamily N member 4 [Source:NCBI gene;Acc:397081]	0	0	0.140078	0.105751	0	0	0	0	614.572	9.26344	up
GO:0010817	regulation of hormone levels	biological_process	5	0.0197905	ENSSSCG00000013754	CACNA1A	calcium voltage-gated channel subunit alpha1 A [Source:NCBI gene;Acc:100525387]	0.02133	0.00985703	0.0134541	0.0178186	0.0498397	0.0472018	0.0284099	0.0521617	0.351662	-1.50774	down
GO:0014028	notochord formation	biological_process	5	0.0197905	ENSSSCG00000005584	CRB2	crumbs cell polarity complex component 2 [Source:NCBI gene;Acc:100511431]	0.040431	0.018636	0.010025	0.022794	0	0	0	0.010935	8.40293	3.07089	up
GO:0009115	xanthine catabolic process	biological_process	11	0.0197905	ENSSSCG00000008522	XDH	xanthine dehydrogenase [Source:NCBI gene;Acc:100515259]	0.252166	0.115657	0.157807	0.298556	0.0307525	0.0547913	0.0339726	0.0307205	5.48591	2.45573	up
GO:2000312	regulation of kainate selective glutamate receptor activity	biological_process	10	0.0197905	ENSSSCG00000027654	NETO1	neuropilin and tolloid like 1 [Source:NCBI gene;Acc:100622872]	0.00786498	0.036241	0.0440407	0.0587965	0	0	0	0	367.358	8.52104	up
GO:0019828	aspartic-type endopeptidase inhibitor activity	molecular_function	8	0.0197905	ENSSSCG00000005584	CRB2	crumbs cell polarity complex component 2 [Source:NCBI gene;Acc:100511431]	0.040431	0.018636	0.010025	0.022794	0	0	0	0.010935	8.40293	3.07089	up
GO:0010574	regulation of vascular endothelial growth factor production	biological_process	7	0.0197905	ENSSSCG00000020970	IL6	interleukin 6 [Source:NCBI gene;Acc:399500]	2.51923	2.82316	4.87588	5.13129	5.23923	6.45856	9.15744	20.8768	0.367813	-1.44296	down
GO:0003219	cardiac right ventricle formation	biological_process	7	0.0197905	ENSSSCG00000031080	HAND1	heart and neural crest derivatives expressed 1 [Source:NCBI gene;Acc:541594]	0.012135	0.076182	0	0.013521	0	0	0	0	254.595	7.99206	up
GO:0032479	regulation of type I interferon production	biological_process	7	0.0197905	ENSSSCG00000021383	CGAS	cyclic GMP-AMP synthase [Source:NCBI gene;Acc:100516408]	0.211824	0.107048	0	0.176027	0.675164	0.29819	0.213437	0.677419	0.265474	-1.91336	down
GO:0048101	calcium- and calmodulin-regulated 3',5'-cyclic-GMP phosphodiesterase activity	molecular_function	11	0.0197905	ENSSSCG00000023924	PDE1A	phosphodiesterase 1A [Source:NCBI gene;Acc:100152819]	0.184694	0.157517	0.102583	0.207681	0.415303	0.123247	0.136439	0.959707	0.399142	-1.32503	down
GO:0004854	xanthine dehydrogenase activity	molecular_function	7	0.0197905	ENSSSCG00000008522	XDH	xanthine dehydrogenase [Source:NCBI gene;Acc:100515259]	0.252166	0.115657	0.157807	0.298556	0.0307525	0.0547913	0.0339726	0.0307205	5.48591	2.45573	up
GO:0008410	CoA-transferase activity	molecular_function	6	0.0197905	ENSSSCG00000003666	ENSSSCG00000003666	succinyl-CoA:3-ketoacid coenzyme A transferase 2, mitochondrial [Source:NCBI gene;Acc:102162296]	0.174833	0.217354	0.069015	0.149209	0.053481	0	0.038545	0	6.63303	2.72967	up
GO:0010718	positive regulation of epithelial to mesenchymal transition	biological_process	8	0.0201756	ENSSSCG00000005584	CRB2	crumbs cell polarity complex component 2 [Source:NCBI gene;Acc:100511431]	0.040431	0.018636	0.010025	0.022794	0	0	0	0.010935	8.40293	3.07089	up
GO:0010718	positive regulation of epithelial to mesenchymal transition	biological_process	8	0.0201756	ENSSSCG00000020970	IL6	interleukin 6 [Source:NCBI gene;Acc:399500]	2.51923	2.82316	4.87588	5.13129	5.23923	6.45856	9.15744	20.8768	0.367813	-1.44296	down
GO:0030414	peptidase inhibitor activity	molecular_function	6	0.0213449	ENSSSCG00000012101	ENSSSCG00000012101	anosmin 1 [Source:NCBI gene;Acc:100154011]	0	0	0	0	0.171408	0.029846	0.104454	0.056215	0.00110521	-9.82147	down
GO:0030414	peptidase inhibitor activity	molecular_function	6	0.0213449	ENSSSCG00000017557	WFIKKN2	WAP, follistatin/kazal, immunoglobulin, kunitz and netrin domain containing 2 [Source:NCBI gene;Acc:100512012]	0.249887	0.205871	0.126918	0.160349	0.071994	0.093531	0.050522	0.09217	2.41072	1.26946	up
GO:0005200	structural constituent of cytoskeleton	molecular_function	4	0.0213449	ENSSSCG00000010103	ENSSSCG00000010103	tubulin alpha-3 chain [Source:NCBI gene;Acc:100155138]	0.107222	0.227949	0.129334	0.240343	0	0.068874	0	0.042865	6.30799	2.65718	up
GO:0005200	structural constituent of cytoskeleton	molecular_function	4	0.0213449	ENSSSCG00000029077	TUBAL3	tubulin alpha like 3 [Source:NCBI gene;Acc:100623355]	0.007797	0.03003	0.008833	0.019154	0.076438	0.038824	0.057903	0.048124	0.297412	-1.74947	down
GO:0010466	negative regulation of peptidase activity	biological_process	10	0.0213449	ENSSSCG00000012101	ENSSSCG00000012101	anosmin 1 [Source:NCBI gene;Acc:100154011]	0	0	0	0	0.171408	0.029846	0.104454	0.056215	0.00110521	-9.82147	down
GO:0010466	negative regulation of peptidase activity	biological_process	10	0.0213449	ENSSSCG00000017557	WFIKKN2	WAP, follistatin/kazal, immunoglobulin, kunitz and netrin domain containing 2 [Source:NCBI gene;Acc:100512012]	0.249887	0.205871	0.126918	0.160349	0.071994	0.093531	0.050522	0.09217	2.41072	1.26946	up
GO:0043025	neuronal cell body	cellular_component	5	0.0219622	ENSSSCG00000003069	KCNN4	potassium calcium-activated channel subfamily N member 4 [Source:NCBI gene;Acc:397081]	0	0	0.140078	0.105751	0	0	0	0	614.572	9.26344	up
GO:0043025	neuronal cell body	cellular_component	5	0.0219622	ENSSSCG00000013754	CACNA1A	calcium voltage-gated channel subunit alpha1 A [Source:NCBI gene;Acc:100525387]	0.02133	0.00985703	0.0134541	0.0178186	0.0498397	0.0472018	0.0284099	0.0521617	0.351662	-1.50774	down
GO:0043025	neuronal cell body	cellular_component	5	0.0219622	ENSSSCG00000016022	ZNF804A	zinc finger protein 804A [Source:NCBI gene;Acc:100524346]	0.0553859	0.12664	0.189437	0.0925699	0.0276792	0.047276	0.056554	0.0325941	2.82769	1.49962	up
GO:0043025	neuronal cell body	cellular_component	5	0.0219622	ENSSSCG00000023924	PDE1A	phosphodiesterase 1A [Source:NCBI gene;Acc:100152819]	0.184694	0.157517	0.102583	0.207681	0.415303	0.123247	0.136439	0.959707	0.399142	-1.32503	down
GO:0010951	negative regulation of endopeptidase activity	biological_process	11	0.0220456	ENSSSCG00000005584	CRB2	crumbs cell polarity complex component 2 [Source:NCBI gene;Acc:100511431]	0.040431	0.018636	0.010025	0.022794	0	0	0	0.010935	8.40293	3.07089	up
GO:0010951	negative regulation of endopeptidase activity	biological_process	11	0.0220456	ENSSSCG00000017557	WFIKKN2	WAP, follistatin/kazal, immunoglobulin, kunitz and netrin domain containing 2 [Source:NCBI gene;Acc:100512012]	0.249887	0.205871	0.126918	0.160349	0.071994	0.093531	0.050522	0.09217	2.41072	1.26946	up
GO:0010951	negative regulation of endopeptidase activity	biological_process	11	0.0220456	ENSSSCG00000030371	ENSSSCG00000030371	serpin A3-8 [Source:NCBI gene;Acc:396685]	0	0	0	0	0.109835	0	0	0.149504	0.00154238	-9.34062	down
GO:0009617	response to bacterium	biological_process	7	0.0253674	ENSSSCG00000004670	C15orf48	chromosome 1 C15orf48 homolog [Source:NCBI gene;Acc:100152534]	3.80373	7.49925	2.12086	2.42394	1.83959	2.25668	1.19419	1.0024	2.51838	1.3325	up
GO:0009617	response to bacterium	biological_process	7	0.0253674	ENSSSCG00000014561	NLRP6	NLR family pyrin domain containing 6 [Source:NCBI gene;Acc:100519245]	0.104384	0.039459	0.016589	0.052776	0.51811	0.05228	0.071686	0.125618	0.277725	-1.84827	down
GO:0009617	response to bacterium	biological_process	7	0.0253674	ENSSSCG00000037358	ENSSSCG00000037358	serum amyloid A-3 protein [Source:NCBI gene;Acc:733603]	16.2985	26.5234	0.799804	11.4058	5.65267	2.30216	0.073928	0.729559	6.28289	2.65143	up
GO:0001889	liver development	biological_process	7	0.0262937	ENSSSCG00000004540	ONECUT2	one cut homeobox 2 [Source:NCBI gene;Acc:106507181]	0	0	0	0	0	0.043783	0.033285	0.013458	0.00441862	-7.82219	down
GO:0001889	liver development	biological_process	7	0.0262937	ENSSSCG00000040317	SOD2	superoxide dismutase 2 [Source:NCBI gene;Acc:100154319]	440.443	811.833	177.56	447.583	341.528	313.897	96.7074	127.848	2.13348	1.09321	up
GO:1903026	negative regulation of RNA polymerase II regulatory region sequence-specific DNA binding	biological_process	9	0.0263007	ENSSSCG00000031080	HAND1	heart and neural crest derivatives expressed 1 [Source:NCBI gene;Acc:541594]	0.012135	0.076182	0	0.013521	0	0	0	0	254.595	7.99206	up
GO:0005896	interleukin-6 receptor complex	cellular_component	6	0.0263007	ENSSSCG00000020970	IL6	interleukin 6 [Source:NCBI gene;Acc:399500]	2.51923	2.82316	4.87588	5.13129	5.23923	6.45856	9.15744	20.8768	0.367813	-1.44296	down
GO:1903352	L-ornithine transmembrane transport	biological_process	8	0.0263007	ENSSSCG00000032113	ENSSSCG00000032113	cationic amino acid transporter 3-like [Source:NCBI gene;Acc:100523440]	0	0	0	0	0.016327	0.0105538	0.0168877	0	0.00913901	-6.77375	down
GO:0006682	galactosylceramide biosynthetic process	biological_process	12	0.0263007	ENSSSCG00000010009	GAL3ST1	galactose-3-O-sulfotransferase 1 [Source:NCBI gene;Acc:100155265]	0.0467954	0.0789851	0.115817	0.0450968	0.186846	0.185555	0.188765	0.104908	0.430424	-1.21617	down
GO:0043950	positive regulation of cAMP-mediated signaling	biological_process	10	0.0263007	ENSSSCG00000021383	CGAS	cyclic GMP-AMP synthase [Source:NCBI gene;Acc:100516408]	0.211824	0.107048	0	0.176027	0.675164	0.29819	0.213437	0.677419	0.265474	-1.91336	down
GO:0000303	response to superoxide	biological_process	8	0.0263007	ENSSSCG00000040317	SOD2	superoxide dismutase 2 [Source:NCBI gene;Acc:100154319]	440.443	811.833	177.56	447.583	341.528	313.897	96.7074	127.848	2.13348	1.09321	up
GO:0038001	paracrine signaling	biological_process	6	0.0263007	ENSSSCG00000021383	CGAS	cyclic GMP-AMP synthase [Source:NCBI gene;Acc:100516408]	0.211824	0.107048	0	0.176027	0.675164	0.29819	0.213437	0.677419	0.265474	-1.91336	down
GO:0001515	opioid peptide activity	molecular_function	7	0.0263007	ENSSSCG00000037684	PDYN	prodynorphin [Source:NCBI gene;Acc:445529]	1.54458	1.47723	2.49974	1.41827	2.6421	22.0147	1.64546	2.12709	0.244107	-2.03441	down
GO:0071953	elastic fiber	cellular_component	5	0.0263007	ENSSSCG00000036007	MFAP4	microfibril associated protein 4 [Source:NCBI gene;Acc:110256120]	0.672427	0.116995	0.027877	0.053744	2.46429	0.02652	0.026398	2.87465	0.161548	-2.62997	down
GO:0002637	regulation of immunoglobulin production	biological_process	8	0.0263007	ENSSSCG00000021383	CGAS	cyclic GMP-AMP synthase [Source:NCBI gene;Acc:100516408]	0.211824	0.107048	0	0.176027	0.675164	0.29819	0.213437	0.677419	0.265474	-1.91336	down
GO:0021545	cranial nerve development	biological_process	6	0.0263007	ENSSSCG00000024492	EPHB1	EPH receptor B1 [Source:NCBI gene;Acc:100524585]	0.040072	0.135855	0.125182	0.079682	0.16303	0.106112	0.412634	0.215447	0.424411	-1.23647	down
GO:0003356	regulation of cilium beat frequency	biological_process	9	0.0263007	ENSSSCG00000011069	ARMC4	armadillo repeat containing 4 [Source:NCBI gene;Acc:100516925]	0.0158597	0.0121004	0	0	0.0386265	0.0782197	0.0455913	0.0130502	0.159328	-2.64993	down
GO:1902725	negative regulation of satellite cell differentiation	biological_process	9	0.0263007	ENSSSCG00000024492	EPHB1	EPH receptor B1 [Source:NCBI gene;Acc:100524585]	0.040072	0.135855	0.125182	0.079682	0.16303	0.106112	0.412634	0.215447	0.424411	-1.23647	down
GO:0042030	ATPase inhibitor activity	molecular_function	6	0.0263007	ENSSSCG00000034163	PLN	phospholamban [Source:NCBI gene;Acc:397421]	1.31763	0.663593	1.79408	2.5748	6.43865	2.88279	3.72296	8.02146	0.301441	-1.73005	down
GO:0016286	small conductance calcium-activated potassium channel activity	molecular_function	10	0.0263007	ENSSSCG00000003069	KCNN4	potassium calcium-activated channel subfamily N member 4 [Source:NCBI gene;Acc:397081]	0	0	0.140078	0.105751	0	0	0	0	614.572	9.26344	up
GO:0001733	galactosylceramide sulfotransferase activity	molecular_function	8	0.0263007	ENSSSCG00000010009	GAL3ST1	galactose-3-O-sulfotransferase 1 [Source:NCBI gene;Acc:100155265]	0.0467954	0.0789851	0.115817	0.0450968	0.186846	0.185555	0.188765	0.104908	0.430424	-1.21617	down
GO:0014832	urinary bladder smooth muscle contraction	biological_process	9	0.0263007	ENSSSCG00000009735	P2RX2	purinergic receptor P2X 2 [Source:NCBI gene;Acc:100736581]	0	0.124022	0.170384	0.0845002	0	0	0	0	947.265	9.88762	up
GO:0097638	L-arginine import across plasma membrane	biological_process	13	0.0263007	ENSSSCG00000032113	ENSSSCG00000032113	cationic amino acid transporter 3-like [Source:NCBI gene;Acc:100523440]	0	0	0	0	0.016327	0.0105538	0.0168877	0	0.00913901	-6.77375	down
GO:0014051	gamma-aminobutyric acid secretion	biological_process	8	0.0263007	ENSSSCG00000013754	CACNA1A	calcium voltage-gated channel subunit alpha1 A [Source:NCBI gene;Acc:100525387]	0.02133	0.00985703	0.0134541	0.0178186	0.0498397	0.0472018	0.0284099	0.0521617	0.351662	-1.50774	down
GO:1902723	negative regulation of skeletal muscle satellite cell proliferation	biological_process	9	0.0263007	ENSSSCG00000024492	EPHB1	EPH receptor B1 [Source:NCBI gene;Acc:100524585]	0.040072	0.135855	0.125182	0.079682	0.16303	0.106112	0.412634	0.215447	0.424411	-1.23647	down
GO:0004784	superoxide dismutase activity	molecular_function	4	0.0263007	ENSSSCG00000040317	SOD2	superoxide dismutase 2 [Source:NCBI gene;Acc:100154319]	440.443	811.833	177.56	447.583	341.528	313.897	96.7074	127.848	2.13348	1.09321	up
GO:0021631	optic nerve morphogenesis	biological_process	6	0.0263007	ENSSSCG00000024492	EPHB1	EPH receptor B1 [Source:NCBI gene;Acc:100524585]	0.040072	0.135855	0.125182	0.079682	0.16303	0.106112	0.412634	0.215447	0.424411	-1.23647	down
GO:0004309	exopolyphosphatase activity	molecular_function	8	0.0327681	ENSSSCG00000026754	ATCAY	ATCAY, caytaxin [Source:NCBI gene;Acc:100626830]	0	0	0	0	0.089454	0	0.032815	0.015637	0.00290053	-8.42947	down
GO:0035662	Toll-like receptor 4 binding	molecular_function	7	0.0327681	ENSSSCG00000037358	ENSSSCG00000037358	serum amyloid A-3 protein [Source:NCBI gene;Acc:733603]	16.2985	26.5234	0.799804	11.4058	5.65267	2.30216	0.073928	0.729559	6.28289	2.65143	up
GO:0045822	negative regulation of heart contraction	biological_process	9	0.0327681	ENSSSCG00000034163	PLN	phospholamban [Source:NCBI gene;Acc:397421]	1.31763	0.663593	1.79408	2.5748	6.43865	2.88279	3.72296	8.02146	0.301441	-1.73005	down
GO:0004028	3-chloroallyl aldehyde dehydrogenase activity	molecular_function	7	0.0327681	ENSSSCG00000026349	ALDH3B2	aldehyde dehydrogenase family 3 member B2-like [Source:NCBI gene;Acc:100522421]	0	0	0	0	0.070135	0	0	0.366194	0.000916739	-10.0912	down
GO:0045602	negative regulation of endothelial cell differentiation	biological_process	9	0.0327681	ENSSSCG00000008522	XDH	xanthine dehydrogenase [Source:NCBI gene;Acc:100515259]	0.252166	0.115657	0.157807	0.298556	0.0307525	0.0547913	0.0339726	0.0307205	5.48591	2.45573	up
GO:0015189	L-lysine transmembrane transporter activity	molecular_function	7	0.0327681	ENSSSCG00000032113	ENSSSCG00000032113	cationic amino acid transporter 3-like [Source:NCBI gene;Acc:100523440]	0	0	0	0	0.016327	0.0105538	0.0168877	0	0.00913901	-6.77375	down
GO:0019372	lipoxygenase pathway	biological_process	10	0.0327681	ENSSSCG00000017980	ALOX12B	arachidonate 12-lipoxygenase, 12R type [Source:NCBI gene;Acc:100526246]	0	0	0	0.023422	0.112108	0.169971	0.046735	0.163495	0.0475758	-4.39363	down
GO:1904447	folate import across plasma membrane	biological_process	8	0.0327681	ENSSSCG00000040746	LRP2	LDL receptor related protein 2 [Source:NCBI gene;Acc:100519689]	0.295167	0.701586	0.542765	0.959293	0.184023	0.427094	0.234247	0.380174	2.03895	1.02783	up
GO:0036414	histone citrullination	biological_process	10	0.0327681	ENSSSCG00000003483	ENSSSCG00000003483	peptidyl arginine deiminase 4 [Source:NCBI gene;Acc:100524749]	0.0307738	0	0.256222	0	0	0	0	0	717.489	9.48681	up
GO:0061371	determination of heart left/right asymmetry	biological_process	8	0.0327681	ENSSSCG00000031080	HAND1	heart and neural crest derivatives expressed 1 [Source:NCBI gene;Acc:541594]	0.012135	0.076182	0	0.013521	0	0	0	0	254.595	7.99206	up
GO:0016011	dystroglycan complex	cellular_component	6	0.0327681	ENSSSCG00000017583	SGCA	sarcoglycan alpha [Source:NCBI gene;Acc:100240723]	0	0	0.007643	0	0.088343	0.0481123	0	0.048865	0.0412421	-4.59974	down
GO:0070257	positive regulation of mucus secretion	biological_process	9	0.0327681	ENSSSCG00000017980	ALOX12B	arachidonate 12-lipoxygenase, 12R type [Source:NCBI gene;Acc:100526246]	0	0	0	0.023422	0.112108	0.169971	0.046735	0.163495	0.0475758	-4.39363	down
GO:0060485	mesenchyme development	biological_process	6	0.0327681	ENSSSCG00000031080	HAND1	heart and neural crest derivatives expressed 1 [Source:NCBI gene;Acc:541594]	0.012135	0.076182	0	0.013521	0	0	0	0	254.595	7.99206	up
GO:0044242	cellular lipid catabolic process	biological_process	7	0.0327681	ENSSSCG00000037358	ENSSSCG00000037358	serum amyloid A-3 protein [Source:NCBI gene;Acc:733603]	16.2985	26.5234	0.799804	11.4058	5.65267	2.30216	0.073928	0.729559	6.28289	2.65143	up
GO:0010459	negative regulation of heart rate	biological_process	10	0.0327681	ENSSSCG00000034163	PLN	phospholamban [Source:NCBI gene;Acc:397421]	1.31763	0.663593	1.79408	2.5748	6.43865	2.88279	3.72296	8.02146	0.301441	-1.73005	down
GO:0043546	molybdopterin cofactor binding	molecular_function	6	0.0327681	ENSSSCG00000008522	XDH	xanthine dehydrogenase [Source:NCBI gene;Acc:100515259]	0.252166	0.115657	0.157807	0.298556	0.0307525	0.0547913	0.0339726	0.0307205	5.48591	2.45573	up
GO:0043651	linoleic acid metabolic process	biological_process	11	0.0327681	ENSSSCG00000017980	ALOX12B	arachidonate 12-lipoxygenase, 12R type [Source:NCBI gene;Acc:100526246]	0	0	0	0.023422	0.112108	0.169971	0.046735	0.163495	0.0475758	-4.39363	down
GO:0035634	response to stilbenoid	biological_process	7	0.0327681	ENSSSCG00000037358	ENSSSCG00000037358	serum amyloid A-3 protein [Source:NCBI gene;Acc:733603]	16.2985	26.5234	0.799804	11.4058	5.65267	2.30216	0.073928	0.729559	6.28289	2.65143	up
GO:0010996	response to auditory stimulus	biological_process	6	0.0327681	ENSSSCG00000035421	ATP8A2	phospholipid-transporting ATPase IB [Source:NCBI gene;Acc:100523747]	0	0	0	0	0	0.106941	0	0	0.00374038	-8.0626	down
GO:0050777	negative regulation of immune response	biological_process	7	0.0327681	ENSSSCG00000014561	NLRP6	NLR family pyrin domain containing 6 [Source:NCBI gene;Acc:100519245]	0.104384	0.039459	0.016589	0.052776	0.51811	0.05228	0.071686	0.125618	0.277725	-1.84827	down
GO:0060252	positive regulation of glial cell proliferation	biological_process	8	0.0327681	ENSSSCG00000020970	IL6	interleukin 6 [Source:NCBI gene;Acc:399500]	2.51923	2.82316	4.87588	5.13129	5.23923	6.45856	9.15744	20.8768	0.367813	-1.44296	down
GO:0000064	L-ornithine transmembrane transporter activity	molecular_function	7	0.0327681	ENSSSCG00000032113	ENSSSCG00000032113	cationic amino acid transporter 3-like [Source:NCBI gene;Acc:100523440]	0	0	0	0	0.016327	0.0105538	0.0168877	0	0.00913901	-6.77375	down
GO:0006081	cellular aldehyde metabolic process	biological_process	5	0.0327681	ENSSSCG00000026349	ALDH3B2	aldehyde dehydrogenase family 3 member B2-like [Source:NCBI gene;Acc:100522421]	0	0	0	0	0.070135	0	0	0.366194	0.000916739	-10.0912	down
GO:0098700	neurotransmitter loading into synaptic vesicle	biological_process	7	0.0327681	ENSSSCG00000038946	SLC17A8	solute carrier family 17 member 8 [Source:NCBI gene;Acc:100526221]	0.557141	0.599388	0.741513	0.662693	0.206377	0.366996	0.426302	0.224553	2.09171	1.06469	up
GO:0016012	sarcoglycan complex	cellular_component	6	0.0327681	ENSSSCG00000017583	SGCA	sarcoglycan alpha [Source:NCBI gene;Acc:100240723]	0	0	0.007643	0	0.088343	0.0481123	0	0.048865	0.0412421	-4.59974	down
GO:0060314	regulation of ryanodine-sensitive calcium-release channel activity	biological_process	10	0.0327681	ENSSSCG00000034163	PLN	phospholamban [Source:NCBI gene;Acc:397421]	1.31763	0.663593	1.79408	2.5748	6.43865	2.88279	3.72296	8.02146	0.301441	-1.73005	down
GO:0006798	polyphosphate catabolic process	biological_process	7	0.0327681	ENSSSCG00000026754	ATCAY	ATCAY, caytaxin [Source:NCBI gene;Acc:100626830]	0	0	0	0	0.089454	0	0.032815	0.015637	0.00290053	-8.42947	down
GO:0051024	positive regulation of immunoglobulin secretion	biological_process	10	0.0327681	ENSSSCG00000020970	IL6	interleukin 6 [Source:NCBI gene;Acc:399500]	2.51923	2.82316	4.87588	5.13129	5.23923	6.45856	9.15744	20.8768	0.367813	-1.44296	down
GO:0086004	regulation of cardiac muscle cell contraction	biological_process	11	0.0327681	ENSSSCG00000034163	PLN	phospholamban [Source:NCBI gene;Acc:397421]	1.31763	0.663593	1.79408	2.5748	6.43865	2.88279	3.72296	8.02146	0.301441	-1.73005	down
GO:0050839	cell adhesion molecule binding	molecular_function	5	0.0344875	ENSSSCG00000000257	ITGB7	integrin subunit beta 7 [Source:NCBI gene;Acc:397221]	0.185201	0.227381	0.35861	0.515071	0.180725	0.12515	0.146028	0.18352	2.02426	1.01739	up
GO:0050839	cell adhesion molecule binding	molecular_function	5	0.0344875	ENSSSCG00000014895	ENSSSCG00000014895		0.447294	2.77269	1.13723	1.15876	0	0.512435	0.137954	0.229386	6.26975	2.64841	up
GO:0030246	carbohydrate binding	molecular_function	4	0.0360182	ENSSSCG00000000636	ENSSSCG00000000636	killer cell lectin-like receptor subfamily A, member 1 [Source:NCBI gene;Acc:397612]	0	0.060397	0.115643	0.329598	0	0	0	0	1264.1	10.3039	up
GO:0030246	carbohydrate binding	molecular_function	4	0.0360182	ENSSSCG00000011735	SI	sucrase-isomaltase [Source:NCBI gene;Acc:100623884]	0	0	0.126363	0	0	0	0	0	315.907	8.30336	up
GO:0030246	carbohydrate binding	molecular_function	4	0.0360182	ENSSSCG00000037879	ENSSSCG00000037879	galectin 7 [Source:NCBI gene;Acc:100217394]	0	0	0	0	0.277325	0.040935	0	0.14385	0.000865595	-10.174	down
GO:0038023	signaling receptor activity	molecular_function	4	0.0368544	ENSSSCG00000000257	ITGB7	integrin subunit beta 7 [Source:NCBI gene;Acc:397221]	0.185201	0.227381	0.35861	0.515071	0.180725	0.12515	0.146028	0.18352	2.02426	1.01739	up
GO:0038023	signaling receptor activity	molecular_function	4	0.0368544	ENSSSCG00000001616	TREML2	triggering receptor expressed on myeloid cells like 2 [Source:NCBI gene;Acc:100738047]	0.054533	0.06149	0.031063	0.055344	0	0	0	0.017578	11.5161	3.52558	up
GO:0038023	signaling receptor activity	molecular_function	4	0.0368544	ENSSSCG00000003386	TNFRSF9	TNF receptor superfamily member 9 [Source:NCBI gene;Acc:100519368]	0.0695877	0.12297	0.188732	0.130953	0.288478	0.336174	0.185547	0.284585	0.467894	-1.09575	down
GO:1900747	negative regulation of vascular endothelial growth factor signaling pathway	biological_process	9	0.0391929	ENSSSCG00000008522	XDH	xanthine dehydrogenase [Source:NCBI gene;Acc:100515259]	0.252166	0.115657	0.157807	0.298556	0.0307525	0.0547913	0.0339726	0.0307205	5.48591	2.45573	up
GO:0008504	monoamine transmembrane transporter activity	molecular_function	6	0.0391929	ENSSSCG00000027768	SLC29A4	solute carrier family 29 member 4 [Source:NCBI gene;Acc:100624843]	0.07378	0.054982	0.041073	0	0.270753	0.039272	0.15353	0.3182	0.217248	-2.20258	down
GO:0050996	positive regulation of lipid catabolic process	biological_process	8	0.0391929	ENSSSCG00000037358	ENSSSCG00000037358	serum amyloid A-3 protein [Source:NCBI gene;Acc:733603]	16.2985	26.5234	0.799804	11.4058	5.65267	2.30216	0.073928	0.729559	6.28289	2.65143	up
GO:0090091	positive regulation of extracellular matrix disassembly	biological_process	9	0.0391929	ENSSSCG00000020970	IL6	interleukin 6 [Source:NCBI gene;Acc:399500]	2.51923	2.82316	4.87588	5.13129	5.23923	6.45856	9.15744	20.8768	0.367813	-1.44296	down
GO:0035381	ATP-gated ion channel activity	molecular_function	9	0.0391929	ENSSSCG00000009735	P2RX2	purinergic receptor P2X 2 [Source:NCBI gene;Acc:100736581]	0	0.124022	0.170384	0.0845002	0	0	0	0	947.265	9.88762	up
GO:0004931	extracellularly ATP-gated cation channel activity	molecular_function	10	0.0391929	ENSSSCG00000009735	P2RX2	purinergic receptor P2X 2 [Source:NCBI gene;Acc:100736581]	0	0.124022	0.170384	0.0845002	0	0	0	0	947.265	9.88762	up
GO:0001505	regulation of neurotransmitter levels	biological_process	5	0.0391929	ENSSSCG00000013754	CACNA1A	calcium voltage-gated channel subunit alpha1 A [Source:NCBI gene;Acc:100525387]	0.02133	0.00985703	0.0134541	0.0178186	0.0498397	0.0472018	0.0284099	0.0521617	0.351662	-1.50774	down
GO:0018101	protein citrullination	biological_process	11	0.0391929	ENSSSCG00000003483	ENSSSCG00000003483	peptidyl arginine deiminase 4 [Source:NCBI gene;Acc:100524749]	0.0307738	0	0.256222	0	0	0	0	0	717.489	9.48681	up
GO:0030856	regulation of epithelial cell differentiation	biological_process	7	0.0391929	ENSSSCG00000008522	XDH	xanthine dehydrogenase [Source:NCBI gene;Acc:100515259]	0.252166	0.115657	0.157807	0.298556	0.0307525	0.0547913	0.0339726	0.0307205	5.48591	2.45573	up
GO:0072678	T cell migration	biological_process	6	0.0391929	ENSSSCG00000000257	ITGB7	integrin subunit beta 7 [Source:NCBI gene;Acc:397221]	0.185201	0.227381	0.35861	0.515071	0.180725	0.12515	0.146028	0.18352	2.02426	1.01739	up
GO:0048019	receptor antagonist activity	molecular_function	6	0.0391929	ENSSSCG00000017557	WFIKKN2	WAP, follistatin/kazal, immunoglobulin, kunitz and netrin domain containing 2 [Source:NCBI gene;Acc:100512012]	0.249887	0.205871	0.126918	0.160349	0.071994	0.093531	0.050522	0.09217	2.41072	1.26946	up
GO:0006119	oxidative phosphorylation	biological_process	6	0.0391929	ENSSSCG00000035727	SURF1	surfeit locus protein 1 [Source:NCBI gene;Acc:110256505]	0.794258	1.0833	1.13023	0.666506	1.04102	2.86432	6.53336	7.01648	0.210499	-2.24811	down
GO:1903401	L-lysine transmembrane transport	biological_process	8	0.0391929	ENSSSCG00000032113	ENSSSCG00000032113	cationic amino acid transporter 3-like [Source:NCBI gene;Acc:100523440]	0	0	0	0	0.016327	0.0105538	0.0168877	0	0.00913901	-6.77375	down
GO:0061156	pulmonary artery morphogenesis	biological_process	8	0.0391929	ENSSSCG00000040746	LRP2	LDL receptor related protein 2 [Source:NCBI gene;Acc:100519689]	0.295167	0.701586	0.542765	0.959293	0.184023	0.427094	0.234247	0.380174	2.03895	1.02783	up
GO:0021516	dorsal spinal cord development	biological_process	5	0.0391929	ENSSSCG00000003423	DRAXIN	dorsal inhibitory axon guidance protein [Source:NCBI gene;Acc:100524629]	0.00774	0.008041	0.015319	0.025872	0	0	0	0	142.43	7.15411	up
GO:0003223	ventricular compact myocardium morphogenesis	biological_process	9	0.0391929	ENSSSCG00000040746	LRP2	LDL receptor related protein 2 [Source:NCBI gene;Acc:100519689]	0.295167	0.701586	0.542765	0.959293	0.184023	0.427094	0.234247	0.380174	2.03895	1.02783	up
GO:0004668	protein-arginine deiminase activity	molecular_function	7	0.0391929	ENSSSCG00000003483	ENSSSCG00000003483	peptidyl arginine deiminase 4 [Source:NCBI gene;Acc:100524749]	0.0307738	0	0.256222	0	0	0	0	0	717.489	9.48681	up
GO:0015181	arginine transmembrane transporter activity	molecular_function	7	0.0391929	ENSSSCG00000032113	ENSSSCG00000032113	cationic amino acid transporter 3-like [Source:NCBI gene;Acc:100523440]	0	0	0	0	0.016327	0.0105538	0.0168877	0	0.00913901	-6.77375	down
GO:0005138	interleukin-6 receptor binding	molecular_function	7	0.0391929	ENSSSCG00000020970	IL6	interleukin 6 [Source:NCBI gene;Acc:399500]	2.51923	2.82316	4.87588	5.13129	5.23923	6.45856	9.15744	20.8768	0.367813	-1.44296	down
GO:0060982	coronary artery morphogenesis	biological_process	8	0.0391929	ENSSSCG00000040746	LRP2	LDL receptor related protein 2 [Source:NCBI gene;Acc:100519689]	0.295167	0.701586	0.542765	0.959293	0.184023	0.427094	0.234247	0.380174	2.03895	1.02783	up
GO:0045794	negative regulation of cell volume	biological_process	8	0.0391929	ENSSSCG00000010325	KCNMA1	potassium calcium-activated channel subfamily M alpha 1 [Source:NCBI gene;Acc:397434]	0.11953	0.0259335	0.020903	0.0945038	0.585101	0.119901	0.110312	0.14883	0.270572	-1.88592	down
GO:0051926	negative regulation of calcium ion transport	biological_process	9	0.0391929	ENSSSCG00000034163	PLN	phospholamban [Source:NCBI gene;Acc:397421]	1.31763	0.663593	1.79408	2.5748	6.43865	2.88279	3.72296	8.02146	0.301441	-1.73005	down
GO:0002862	negative regulation of inflammatory response to antigenic stimulus	biological_process	10	0.0391929	ENSSSCG00000014561	NLRP6	NLR family pyrin domain containing 6 [Source:NCBI gene;Acc:100519245]	0.104384	0.039459	0.016589	0.052776	0.51811	0.05228	0.071686	0.125618	0.277725	-1.84827	down
GO:0008525	phosphatidylcholine transporter activity	molecular_function	6	0.0391929	ENSSSCG00000025681	ENSSSCG00000025681	phosphatidylcholine transfer protein [Source:NCBI gene;Acc:100621260]	0.037365	0	0	0	0	0.274144	0.278924	0.102669	0.0569817	-4.13336	down
GO:0008046	axon guidance receptor activity	molecular_function	6	0.0391929	ENSSSCG00000024492	EPHB1	EPH receptor B1 [Source:NCBI gene;Acc:100524585]	0.040072	0.135855	0.125182	0.079682	0.16303	0.106112	0.412634	0.215447	0.424411	-1.23647	down
GO:0010506	regulation of autophagy	biological_process	8	0.0419696	ENSSSCG00000014561	NLRP6	NLR family pyrin domain containing 6 [Source:NCBI gene;Acc:100519245]	0.104384	0.039459	0.016589	0.052776	0.51811	0.05228	0.071686	0.125618	0.277725	-1.84827	down
GO:0010506	regulation of autophagy	biological_process	8	0.0419696	ENSSSCG00000038602	ENSSSCG00000038602	SOGA family member 3 [Source:NCBI gene;Acc:100512321]	0.0284553	0.0253097	0	0.0190802	0.0613501	0.163273	0.0555039	0.0590117	0.214794	-2.21897	down
GO:0030512	negative regulation of transforming growth factor beta receptor signaling pathway	biological_process	10	0.0419696	ENSSSCG00000004540	ONECUT2	one cut homeobox 2 [Source:NCBI gene;Acc:106507181]	0	0	0	0	0	0.043783	0.033285	0.013458	0.00441862	-7.82219	down
GO:0030512	negative regulation of transforming growth factor beta receptor signaling pathway	biological_process	10	0.0419696	ENSSSCG00000017557	WFIKKN2	WAP, follistatin/kazal, immunoglobulin, kunitz and netrin domain containing 2 [Source:NCBI gene;Acc:100512012]	0.249887	0.205871	0.126918	0.160349	0.071994	0.093531	0.050522	0.09217	2.41072	1.26946	up
GO:0030900	forebrain development	biological_process	5	0.043533	ENSSSCG00000003423	DRAXIN	dorsal inhibitory axon guidance protein [Source:NCBI gene;Acc:100524629]	0.00774	0.008041	0.015319	0.025872	0	0	0	0	142.43	7.15411	up
GO:0030900	forebrain development	biological_process	5	0.043533	ENSSSCG00000040746	LRP2	LDL receptor related protein 2 [Source:NCBI gene;Acc:100519689]	0.295167	0.701586	0.542765	0.959293	0.184023	0.427094	0.234247	0.380174	2.03895	1.02783	up
GO:0043005	neuron projection	cellular_component	5	0.044307	ENSSSCG00000003069	KCNN4	potassium calcium-activated channel subfamily N member 4 [Source:NCBI gene;Acc:397081]	0	0	0.140078	0.105751	0	0	0	0	614.572	9.26344	up
GO:0043005	neuron projection	cellular_component	5	0.044307	ENSSSCG00000014895	ENSSSCG00000014895		0.447294	2.77269	1.13723	1.15876	0	0.512435	0.137954	0.229386	6.26975	2.64841	up
GO:0043005	neuron projection	cellular_component	5	0.044307	ENSSSCG00000024492	EPHB1	EPH receptor B1 [Source:NCBI gene;Acc:100524585]	0.040072	0.135855	0.125182	0.079682	0.16303	0.106112	0.412634	0.215447	0.424411	-1.23647	down
GO:0043005	neuron projection	cellular_component	5	0.044307	ENSSSCG00000026754	ATCAY	ATCAY, caytaxin [Source:NCBI gene;Acc:100626830]	0	0	0	0	0.089454	0	0.032815	0.015637	0.00290053	-8.42947	down
GO:0005337	nucleoside transmembrane transporter activity	molecular_function	6	0.0455754	ENSSSCG00000027768	SLC29A4	solute carrier family 29 member 4 [Source:NCBI gene;Acc:100624843]	0.07378	0.054982	0.041073	0	0.270753	0.039272	0.15353	0.3182	0.217248	-2.20258	down
GO:0050965	detection of temperature stimulus involved in sensory perception of pain	biological_process	8	0.0455754	ENSSSCG00000024492	EPHB1	EPH receptor B1 [Source:NCBI gene;Acc:100524585]	0.040072	0.135855	0.125182	0.079682	0.16303	0.106112	0.412634	0.215447	0.424411	-1.23647	down
GO:0015271	outward rectifier potassium channel activity	molecular_function	10	0.0455754	ENSSSCG00000010325	KCNMA1	potassium calcium-activated channel subfamily M alpha 1 [Source:NCBI gene;Acc:397434]	0.11953	0.0259335	0.020903	0.0945038	0.585101	0.119901	0.110312	0.14883	0.270572	-1.88592	down
GO:0016281	eukaryotic translation initiation factor 4F complex	cellular_component	4	0.0455754	ENSSSCG00000014052	EIF4E1B	eukaryotic translation initiation factor 4E family member 1B [Source:NCBI gene;Acc:100523233]	0.188853	0	0.057771	0.658422	0	0	0.033915	0.007078	22.0781	4.46454	up
GO:0060087	relaxation of vascular smooth muscle	biological_process	8	0.0455754	ENSSSCG00000010325	KCNMA1	potassium calcium-activated channel subfamily M alpha 1 [Source:NCBI gene;Acc:397434]	0.11953	0.0259335	0.020903	0.0945038	0.585101	0.119901	0.110312	0.14883	0.270572	-1.88592	down
GO:0001614	purinergic nucleotide receptor activity	molecular_function	7	0.0455754	ENSSSCG00000009735	P2RX2	purinergic receptor P2X 2 [Source:NCBI gene;Acc:100736581]	0	0.124022	0.170384	0.0845002	0	0	0	0	947.265	9.88762	up
GO:0044267	cellular protein metabolic process	biological_process	7	0.0455754	ENSSSCG00000014988	MMP13	matrix metallopeptidase 13 [Source:NCBI gene;Acc:397346]	4.41573	0.779192	2.73243	0.822949	1.12681	0.478646	0.65519	0.178644	3.58723	1.84287	up
GO:0051384	response to glucocorticoid	biological_process	8	0.0455754	ENSSSCG00000020970	IL6	interleukin 6 [Source:NCBI gene;Acc:399500]	2.51923	2.82316	4.87588	5.13129	5.23923	6.45856	9.15744	20.8768	0.367813	-1.44296	down
GO:1901642	nucleoside transmembrane transport	biological_process	9	0.0455754	ENSSSCG00000027768	SLC29A4	solute carrier family 29 member 4 [Source:NCBI gene;Acc:100624843]	0.07378	0.054982	0.041073	0	0.270753	0.039272	0.15353	0.3182	0.217248	-2.20258	down
GO:0045199	maintenance of epithelial cell apical/basal polarity	biological_process	7	0.0455754	ENSSSCG00000005584	CRB2	crumbs cell polarity complex component 2 [Source:NCBI gene;Acc:100511431]	0.040431	0.018636	0.010025	0.022794	0	0	0	0.010935	8.40293	3.07089	up
GO:0048251	elastic fiber assembly	biological_process	7	0.0455754	ENSSSCG00000036007	MFAP4	microfibril associated protein 4 [Source:NCBI gene;Acc:110256120]	0.672427	0.116995	0.027877	0.053744	2.46429	0.02652	0.026398	2.87465	0.161548	-2.62997	down
GO:0071493	cellular response to UV-B	biological_process	9	0.0455754	ENSSSCG00000036007	MFAP4	microfibril associated protein 4 [Source:NCBI gene;Acc:110256120]	0.672427	0.116995	0.027877	0.053744	2.46429	0.02652	0.026398	2.87465	0.161548	-2.62997	down
GO:0010737	protein kinase A signaling	biological_process	6	0.0455754	ENSSSCG00000021645	MROH2B	maestro heat like repeat family member 2B [Source:NCBI gene;Acc:100521872]	0.031199	0.040556	0.017084	0	0	0	0	0	222.097	7.79505	up
GO:0008541	proteasome regulatory particle, lid subcomplex	cellular_component	4	0.0455754	ENSSSCG00000011910	ENSSSCG00000011910	SEM1, 26S proteasome complex subunit [Source:NCBI gene;Acc:100155621]	0.832802	0.563205	2.46644	2.17273	0.358046	0.75689	0.188579	0.116318	4.25063	2.08768	up
GO:0007586	digestion	biological_process	4	0.0455754	ENSSSCG00000034746	CAPN8	calpain 8 [Source:NCBI gene;Acc:100625563]	0	0	0	0	0	0.211644	0.0716674	0.528428	0.000492769	-10.9868	down
GO:0007270	neuron-neuron synaptic transmission	biological_process	10	0.0455754	ENSSSCG00000013754	CACNA1A	calcium voltage-gated channel subunit alpha1 A [Source:NCBI gene;Acc:100525387]	0.02133	0.00985703	0.0134541	0.0178186	0.0498397	0.0472018	0.0284099	0.0521617	0.351662	-1.50774	down
GO:0060536	cartilage morphogenesis	biological_process	6	0.0455754	ENSSSCG00000031080	HAND1	heart and neural crest derivatives expressed 1 [Source:NCBI gene;Acc:541594]	0.012135	0.076182	0	0.013521	0	0	0	0	254.595	7.99206	up
GO:0099509	regulation of presynaptic cytosolic calcium ion concentration	biological_process	13	0.0455754	ENSSSCG00000013754	CACNA1A	calcium voltage-gated channel subunit alpha1 A [Source:NCBI gene;Acc:100525387]	0.02133	0.00985703	0.0134541	0.0178186	0.0498397	0.0472018	0.0284099	0.0521617	0.351662	-1.50774	down
GO:0010976	positive regulation of neuron projection development	biological_process	11	0.0499976	ENSSSCG00000016022	ZNF804A	zinc finger protein 804A [Source:NCBI gene;Acc:100524346]	0.0553859	0.12664	0.189437	0.0925699	0.0276792	0.047276	0.056554	0.0325941	2.82769	1.49962	up
GO:0010976	positive regulation of neuron projection development	biological_process	11	0.0499976	ENSSSCG00000035421	ATP8A2	phospholipid-transporting ATPase IB [Source:NCBI gene;Acc:100523747]	0	0	0	0	0	0.106941	0	0	0.00374038	-8.0626	down
GO:0051607	defense response to virus	biological_process	5	0.0505756	ENSSSCG00000020970	IL6	interleukin 6 [Source:NCBI gene;Acc:399500]	2.51923	2.82316	4.87588	5.13129	5.23923	6.45856	9.15744	20.8768	0.367813	-1.44296	down
GO:0051607	defense response to virus	biological_process	5	0.0505756	ENSSSCG00000021383	CGAS	cyclic GMP-AMP synthase [Source:NCBI gene;Acc:100516408]	0.211824	0.107048	0	0.176027	0.675164	0.29819	0.213437	0.677419	0.265474	-1.91336	down
GO:0051607	defense response to virus	biological_process	5	0.0505756	ENSSSCG00000031022	IFN-DELTA-7	interferon delta 7 [Source:NCBI gene;Acc:100303727]	0.262573	0.106276	0.0713	0.396111	0	0	0	0	2090.65	11.0297	up
GO:0010628	positive regulation of gene expression	biological_process	8	0.0508502	ENSSSCG00000013865	NWD1	NACHT and WD repeat domain containing 1 [Source:NCBI gene;Acc:100737957]	0	0	0	0	0	0.0134069	0.026871	0.0161217	0.00709226	-7.13954	down
GO:0010628	positive regulation of gene expression	biological_process	8	0.0508502	ENSSSCG00000015636	VSTM2A	V-set and transmembrane domain containing 2A [Source:NCBI gene;Acc:100517233]	0	0	0	0	0.259666	0	0	0	0.00154044	-9.34244	down
GO:0010628	positive regulation of gene expression	biological_process	8	0.0508502	ENSSSCG00000016022	ZNF804A	zinc finger protein 804A [Source:NCBI gene;Acc:100524346]	0.0553859	0.12664	0.189437	0.0925699	0.0276792	0.047276	0.056554	0.0325941	2.82769	1.49962	up
GO:0010628	positive regulation of gene expression	biological_process	8	0.0508502	ENSSSCG00000017980	ALOX12B	arachidonate 12-lipoxygenase, 12R type [Source:NCBI gene;Acc:100526246]	0	0	0	0.023422	0.112108	0.169971	0.046735	0.163495	0.0475758	-4.39363	down
GO:0010628	positive regulation of gene expression	biological_process	8	0.0508502	ENSSSCG00000020970	IL6	interleukin 6 [Source:NCBI gene;Acc:399500]	2.51923	2.82316	4.87588	5.13129	5.23923	6.45856	9.15744	20.8768	0.367813	-1.44296	down
GO:0009650	UV protection	biological_process	8	0.051916	ENSSSCG00000036007	MFAP4	microfibril associated protein 4 [Source:NCBI gene;Acc:110256120]	0.672427	0.116995	0.027877	0.053744	2.46429	0.02652	0.026398	2.87465	0.161548	-2.62997	down
GO:0006953	acute-phase response	biological_process	8	0.051916	ENSSSCG00000037358	ENSSSCG00000037358	serum amyloid A-3 protein [Source:NCBI gene;Acc:733603]	16.2985	26.5234	0.799804	11.4058	5.65267	2.30216	0.073928	0.729559	6.28289	2.65143	up
GO:0030432	peristalsis	biological_process	9	0.051916	ENSSSCG00000009735	P2RX2	purinergic receptor P2X 2 [Source:NCBI gene;Acc:100736581]	0	0.124022	0.170384	0.0845002	0	0	0	0	947.265	9.88762	up
GO:0021953	central nervous system neuron differentiation	biological_process	7	0.051916	ENSSSCG00000013754	CACNA1A	calcium voltage-gated channel subunit alpha1 A [Source:NCBI gene;Acc:100525387]	0.02133	0.00985703	0.0134541	0.0178186	0.0498397	0.0472018	0.0284099	0.0521617	0.351662	-1.50774	down
GO:0005751	mitochondrial respiratory chain complex IV	cellular_component	6	0.051916	ENSSSCG00000004670	C15orf48	chromosome 1 C15orf48 homolog [Source:NCBI gene;Acc:100152534]	3.80373	7.49925	2.12086	2.42394	1.83959	2.25668	1.19419	1.0024	2.51838	1.3325	up
GO:0035590	purinergic nucleotide receptor signaling pathway	biological_process	7	0.051916	ENSSSCG00000009735	P2RX2	purinergic receptor P2X 2 [Source:NCBI gene;Acc:100736581]	0	0.124022	0.170384	0.0845002	0	0	0	0	947.265	9.88762	up
GO:0090279	regulation of calcium ion import	biological_process	10	0.051916	ENSSSCG00000034163	PLN	phospholamban [Source:NCBI gene;Acc:397421]	1.31763	0.663593	1.79408	2.5748	6.43865	2.88279	3.72296	8.02146	0.301441	-1.73005	down
GO:0001527	microfibril	cellular_component	5	0.051916	ENSSSCG00000036007	MFAP4	microfibril associated protein 4 [Source:NCBI gene;Acc:110256120]	0.672427	0.116995	0.027877	0.053744	2.46429	0.02652	0.026398	2.87465	0.161548	-2.62997	down
GO:0048168	regulation of neuronal synaptic plasticity	biological_process	10	0.051916	ENSSSCG00000027654	NETO1	neuropilin and tolloid like 1 [Source:NCBI gene;Acc:100622872]	0.00786498	0.036241	0.0440407	0.0587965	0	0	0	0	367.358	8.52104	up
GO:0015844	monoamine transport	biological_process	7	0.051916	ENSSSCG00000027768	SLC29A4	solute carrier family 29 member 4 [Source:NCBI gene;Acc:100624843]	0.07378	0.054982	0.041073	0	0.270753	0.039272	0.15353	0.3182	0.217248	-2.20258	down
GO:0031284	positive regulation of guanylate cyclase activity	biological_process	8	0.051916	ENSSSCG00000001636	GUCA1A	guanylate cyclase activator 1A [Source:NCBI gene;Acc:100739200]	0.062988	0.164763	0.236424	0.111331	0.353288	0.30342	0.380666	0.222057	0.456957	-1.12987	down
GO:0014823	response to activity	biological_process	4	0.051916	ENSSSCG00000040317	SOD2	superoxide dismutase 2 [Source:NCBI gene;Acc:100154319]	440.443	811.833	177.56	447.583	341.528	313.897	96.7074	127.848	2.13348	1.09321	up
GO:0060052	neurofilament cytoskeleton organization	biological_process	8	0.051916	ENSSSCG00000035421	ATP8A2	phospholipid-transporting ATPase IB [Source:NCBI gene;Acc:100523747]	0	0	0	0	0	0.106941	0	0	0.00374038	-8.0626	down
GO:0048935	peripheral nervous system neuron development	biological_process	7	0.051916	ENSSSCG00000004540	ONECUT2	one cut homeobox 2 [Source:NCBI gene;Acc:106507181]	0	0	0	0	0	0.043783	0.033285	0.013458	0.00441862	-7.82219	down
GO:0010881	regulation of cardiac muscle contraction by regulation of the release of sequestered calcium ion	biological_process	9	0.051916	ENSSSCG00000034163	PLN	phospholamban [Source:NCBI gene;Acc:397421]	1.31763	0.663593	1.79408	2.5748	6.43865	2.88279	3.72296	8.02146	0.301441	-1.73005	down
GO:0097435	supramolecular fiber organization	biological_process	5	0.051916	ENSSSCG00000036007	MFAP4	microfibril associated protein 4 [Source:NCBI gene;Acc:110256120]	0.672427	0.116995	0.027877	0.053744	2.46429	0.02652	0.026398	2.87465	0.161548	-2.62997	down
GO:0097120	receptor localization to synapse	biological_process	7	0.051916	ENSSSCG00000027654	NETO1	neuropilin and tolloid like 1 [Source:NCBI gene;Acc:100622872]	0.00786498	0.036241	0.0440407	0.0587965	0	0	0	0	367.358	8.52104	up
GO:0071944	cell periphery	cellular_component	4	0.0550584	ENSSSCG00000001844	PLIN1	perilipin 1 [Source:NCBI gene;Acc:654411]	0.0876927	0	0.0253353	0.169325	0	0	0	0	705.882	9.46328	up
GO:0071944	cell periphery	cellular_component	4	0.0550584	ENSSSCG00000008294	ACTG2	actin, gamma 2, smooth muscle, enteric [Source:NCBI gene;Acc:100520667]	4.60373	0.917775	6.16586	1.4254	13.9919	5.35347	4.98534	7.95061	0.406204	-1.29973	down
GO:0008331	high voltage-gated calcium channel activity	molecular_function	10	0.0582148	ENSSSCG00000013754	CACNA1A	calcium voltage-gated channel subunit alpha1 A [Source:NCBI gene;Acc:100525387]	0.02133	0.00985703	0.0134541	0.0178186	0.0498397	0.0472018	0.0284099	0.0521617	0.351662	-1.50774	down
GO:0021702	cerebellar Purkinje cell differentiation	biological_process	7	0.0582148	ENSSSCG00000013754	CACNA1A	calcium voltage-gated channel subunit alpha1 A [Source:NCBI gene;Acc:100525387]	0.02133	0.00985703	0.0134541	0.0178186	0.0498397	0.0472018	0.0284099	0.0521617	0.351662	-1.50774	down
GO:0032780	negative regulation of ATPase activity	biological_process	8	0.0582148	ENSSSCG00000034163	PLN	phospholamban [Source:NCBI gene;Acc:397421]	1.31763	0.663593	1.79408	2.5748	6.43865	2.88279	3.72296	8.02146	0.301441	-1.73005	down
GO:0003417	growth plate cartilage development	biological_process	8	0.0582148	ENSSSCG00000014988	MMP13	matrix metallopeptidase 13 [Source:NCBI gene;Acc:397346]	4.41573	0.779192	2.73243	0.822949	1.12681	0.478646	0.65519	0.178644	3.58723	1.84287	up
GO:0009247	glycolipid biosynthetic process	biological_process	9	0.0582148	ENSSSCG00000010009	GAL3ST1	galactose-3-O-sulfotransferase 1 [Source:NCBI gene;Acc:100155265]	0.0467954	0.0789851	0.115817	0.0450968	0.186846	0.185555	0.188765	0.104908	0.430424	-1.21617	down
GO:2000774	positive regulation of cellular senescence	biological_process	7	0.0582148	ENSSSCG00000021383	CGAS	cyclic GMP-AMP synthase [Source:NCBI gene;Acc:100516408]	0.211824	0.107048	0	0.176027	0.675164	0.29819	0.213437	0.677419	0.265474	-1.91336	down
GO:0019369	arachidonic acid metabolic process	biological_process	11	0.0582148	ENSSSCG00000017980	ALOX12B	arachidonate 12-lipoxygenase, 12R type [Source:NCBI gene;Acc:100526246]	0	0	0	0.023422	0.112108	0.169971	0.046735	0.163495	0.0475758	-4.39363	down
GO:0010884	positive regulation of lipid storage	biological_process	6	0.0582148	ENSSSCG00000015636	VSTM2A	V-set and transmembrane domain containing 2A [Source:NCBI gene;Acc:100517233]	0	0	0	0	0.259666	0	0	0	0.00154044	-9.34244	down
GO:0010739	positive regulation of protein kinase A signaling	biological_process	10	0.0582148	ENSSSCG00000037358	ENSSSCG00000037358	serum amyloid A-3 protein [Source:NCBI gene;Acc:733603]	16.2985	26.5234	0.799804	11.4058	5.65267	2.30216	0.073928	0.729559	6.28289	2.65143	up
GO:0060068	vagina development	biological_process	8	0.0582148	ENSSSCG00000040746	LRP2	LDL receptor related protein 2 [Source:NCBI gene;Acc:100519689]	0.295167	0.701586	0.542765	0.959293	0.184023	0.427094	0.234247	0.380174	2.03895	1.02783	up
GO:0045078	positive regulation of interferon-gamma biosynthetic process	biological_process	9	0.0582148	ENSSSCG00000039300	IL27	interleukin 27 [Source:NCBI gene;Acc:493187]	0.387126	0.129744	0.126177	0.125406	0.042583	0	0	0	18.046	4.17361	up
GO:0051899	membrane depolarization	biological_process	6	0.0582148	ENSSSCG00000013754	CACNA1A	calcium voltage-gated channel subunit alpha1 A [Source:NCBI gene;Acc:100525387]	0.02133	0.00985703	0.0134541	0.0178186	0.0498397	0.0472018	0.0284099	0.0521617	0.351662	-1.50774	down
GO:0010470	regulation of gastrulation	biological_process	7	0.0582148	ENSSSCG00000005584	CRB2	crumbs cell polarity complex component 2 [Source:NCBI gene;Acc:100511431]	0.040431	0.018636	0.010025	0.022794	0	0	0	0.010935	8.40293	3.07089	up
GO:0003139	secondary heart field specification	biological_process	8	0.0582148	ENSSSCG00000040746	LRP2	LDL receptor related protein 2 [Source:NCBI gene;Acc:100519689]	0.295167	0.701586	0.542765	0.959293	0.184023	0.427094	0.234247	0.380174	2.03895	1.02783	up
GO:0090336	positive regulation of brown fat cell differentiation	biological_process	9	0.0582148	ENSSSCG00000015636	VSTM2A	V-set and transmembrane domain containing 2A [Source:NCBI gene;Acc:100517233]	0	0	0	0	0.259666	0	0	0	0.00154044	-9.34244	down
GO:0021952	central nervous system projection neuron axonogenesis	biological_process	11	0.0582148	ENSSSCG00000024492	EPHB1	EPH receptor B1 [Source:NCBI gene;Acc:100524585]	0.040072	0.135855	0.125182	0.079682	0.16303	0.106112	0.412634	0.215447	0.424411	-1.23647	down
GO:0004867	serine-type endopeptidase inhibitor activity	molecular_function	8	0.0602912	ENSSSCG00000017557	WFIKKN2	WAP, follistatin/kazal, immunoglobulin, kunitz and netrin domain containing 2 [Source:NCBI gene;Acc:100512012]	0.249887	0.205871	0.126918	0.160349	0.071994	0.093531	0.050522	0.09217	2.41072	1.26946	up
GO:0004867	serine-type endopeptidase inhibitor activity	molecular_function	8	0.0602912	ENSSSCG00000030371	ENSSSCG00000030371	serpin A3-8 [Source:NCBI gene;Acc:396685]	0	0	0	0	0.109835	0	0	0.149504	0.00154238	-9.34062	down
GO:0005179	hormone activity	molecular_function	7	0.0602912	ENSSSCG00000005214	INSL6	insulin like 6 [Source:NCBI gene;Acc:100158105]	0	0	0	0	0.309859	0.19965	0.377705	0	0.00045085	-11.1151	down
GO:0005179	hormone activity	molecular_function	7	0.0602912	ENSSSCG00000039721	PRL	prolactin [Source:NCBI gene;Acc:396965]	0	0	0	0	0.017715	0	0.066378	0.032532	0.0034298	-8.18766	down
GO:0050790	regulation of catalytic activity	biological_process	5	0.0620722	ENSSSCG00000029651	SLN	sarcolipin [Source:NCBI gene;Acc:733627]	0.037571	0	0.047445	0.08046	0.377891	0.210467	0.117272	0.131093	0.197767	-2.33813	down
GO:0050790	regulation of catalytic activity	biological_process	5	0.0620722	ENSSSCG00000040317	SOD2	superoxide dismutase 2 [Source:NCBI gene;Acc:100154319]	440.443	811.833	177.56	447.583	341.528	313.897	96.7074	127.848	2.13348	1.09321	up
GO:0005267	potassium channel activity	molecular_function	8	0.063871	ENSSSCG00000003069	KCNN4	potassium calcium-activated channel subfamily N member 4 [Source:NCBI gene;Acc:397081]	0	0	0.140078	0.105751	0	0	0	0	614.572	9.26344	up
GO:0005267	potassium channel activity	molecular_function	8	0.063871	ENSSSCG00000010325	KCNMA1	potassium calcium-activated channel subfamily M alpha 1 [Source:NCBI gene;Acc:397434]	0.11953	0.0259335	0.020903	0.0945038	0.585101	0.119901	0.110312	0.14883	0.270572	-1.88592	down
GO:0019430	removal of superoxide radicals	biological_process	7	0.0644721	ENSSSCG00000040317	SOD2	superoxide dismutase 2 [Source:NCBI gene;Acc:100154319]	440.443	811.833	177.56	447.583	341.528	313.897	96.7074	127.848	2.13348	1.09321	up
GO:0002064	epithelial cell development	biological_process	6	0.0644721	ENSSSCG00000004540	ONECUT2	one cut homeobox 2 [Source:NCBI gene;Acc:106507181]	0	0	0	0	0	0.043783	0.033285	0.013458	0.00441862	-7.82219	down
GO:0010804	negative regulation of tumor necrosis factor-mediated signaling pathway	biological_process	10	0.0644721	ENSSSCG00000011110	CCDC3	coiled-coil domain-containing protein 3 [Source:NCBI gene;Acc:100510975]	2.75071	0.930901	0.982636	0.802897	8.75776	1.4694	0.913093	5.07058	0.337253	-1.5681	down
GO:0010880	regulation of release of sequestered calcium ion into cytosol by sarcoplasmic reticulum	biological_process	8	0.0644721	ENSSSCG00000034163	PLN	phospholamban [Source:NCBI gene;Acc:397421]	1.31763	0.663593	1.79408	2.5748	6.43865	2.88279	3.72296	8.02146	0.301441	-1.73005	down
GO:0042554	superoxide anion generation	biological_process	7	0.0644721	ENSSSCG00000040317	SOD2	superoxide dismutase 2 [Source:NCBI gene;Acc:100154319]	440.443	811.833	177.56	447.583	341.528	313.897	96.7074	127.848	2.13348	1.09321	up
GO:0031005	filamin binding	molecular_function	6	0.0644721	ENSSSCG00000037457	HSPB7	heat shock protein family B (small) member 7 [Source:NCBI gene;Acc:100627988]	0.139649	0.020884	0.065506	0	1.15429	0.069848	0.043008	0.206936	0.153342	-2.70517	down
GO:0000302	response to reactive oxygen species	biological_process	6	0.0644721	ENSSSCG00000040317	SOD2	superoxide dismutase 2 [Source:NCBI gene;Acc:100154319]	440.443	811.833	177.56	447.583	341.528	313.897	96.7074	127.848	2.13348	1.09321	up
GO:0048265	response to pain	biological_process	6	0.0644721	ENSSSCG00000013754	CACNA1A	calcium voltage-gated channel subunit alpha1 A [Source:NCBI gene;Acc:100525387]	0.02133	0.00985703	0.0134541	0.0178186	0.0498397	0.0472018	0.0284099	0.0521617	0.351662	-1.50774	down
GO:0043248	proteasome assembly	biological_process	8	0.0644721	ENSSSCG00000011910	ENSSSCG00000011910	SEM1, 26S proteasome complex subunit [Source:NCBI gene;Acc:100155621]	0.832802	0.563205	2.46644	2.17273	0.358046	0.75689	0.188579	0.116318	4.25063	2.08768	up
GO:0007252	I-kappaB phosphorylation	biological_process	10	0.0644721	ENSSSCG00000037358	ENSSSCG00000037358	serum amyloid A-3 protein [Source:NCBI gene;Acc:733603]	16.2985	26.5234	0.799804	11.4058	5.65267	2.30216	0.073928	0.729559	6.28289	2.65143	up
GO:0042129	regulation of T cell proliferation	biological_process	10	0.0644721	ENSSSCG00000039300	IL27	interleukin 27 [Source:NCBI gene;Acc:493187]	0.387126	0.129744	0.126177	0.125406	0.042583	0	0	0	18.046	4.17361	up
GO:0048678	response to axon injury	biological_process	6	0.0644721	ENSSSCG00000040317	SOD2	superoxide dismutase 2 [Source:NCBI gene;Acc:100154319]	440.443	811.833	177.56	447.583	341.528	313.897	96.7074	127.848	2.13348	1.09321	up
GO:0030234	enzyme regulator activity	molecular_function	4	0.0644721	ENSSSCG00000029651	SLN	sarcolipin [Source:NCBI gene;Acc:733627]	0.037571	0	0.047445	0.08046	0.377891	0.210467	0.117272	0.131093	0.197767	-2.33813	down
GO:0000166	nucleotide binding	molecular_function	5	0.0702566	ENSSSCG00000004646	ATP8B4	ATPase phospholipid transporting 8B4 (putative) [Source:NCBI gene;Acc:100154720]	0.0615731	0.45834	0.231173	1.22783	0.154983	0.170382	0.0929394	0.217412	3.11289	1.63825	up
GO:0000166	nucleotide binding	molecular_function	5	0.0702566	ENSSSCG00000008294	ACTG2	actin, gamma 2, smooth muscle, enteric [Source:NCBI gene;Acc:100520667]	4.60373	0.917775	6.16586	1.4254	13.9919	5.35347	4.98534	7.95061	0.406204	-1.29973	down
GO:0000166	nucleotide binding	molecular_function	5	0.0702566	ENSSSCG00000009543	MYO16	myosin XVI [Source:NCBI gene;Acc:102161679]	0	0.044785	0	0.127558	0	0	0	0	430.858	8.75107	up
GO:0000166	nucleotide binding	molecular_function	5	0.0702566	ENSSSCG00000010103	ENSSSCG00000010103	tubulin alpha-3 chain [Source:NCBI gene;Acc:100155138]	0.107222	0.227949	0.129334	0.240343	0	0.068874	0	0.042865	6.30799	2.65718	up
GO:0000166	nucleotide binding	molecular_function	5	0.0702566	ENSSSCG00000012137	BMX	BMX non-receptor tyrosine kinase [Source:NCBI gene;Acc:100516528]	0.470346	0.451285	0.546133	1.00719	1.1298	0.604344	0.774901	3.02998	0.446821	-1.16223	down
GO:0000166	nucleotide binding	molecular_function	5	0.0702566	ENSSSCG00000014561	NLRP6	NLR family pyrin domain containing 6 [Source:NCBI gene;Acc:100519245]	0.104384	0.039459	0.016589	0.052776	0.51811	0.05228	0.071686	0.125618	0.277725	-1.84827	down
GO:0000166	nucleotide binding	molecular_function	5	0.0702566	ENSSSCG00000021383	CGAS	cyclic GMP-AMP synthase [Source:NCBI gene;Acc:100516408]	0.211824	0.107048	0	0.176027	0.675164	0.29819	0.213437	0.677419	0.265474	-1.91336	down
GO:0000166	nucleotide binding	molecular_function	5	0.0702566	ENSSSCG00000024492	EPHB1	EPH receptor B1 [Source:NCBI gene;Acc:100524585]	0.040072	0.135855	0.125182	0.079682	0.16303	0.106112	0.412634	0.215447	0.424411	-1.23647	down
GO:0000166	nucleotide binding	molecular_function	5	0.0702566	ENSSSCG00000029077	TUBAL3	tubulin alpha like 3 [Source:NCBI gene;Acc:100623355]	0.007797	0.03003	0.008833	0.019154	0.076438	0.038824	0.057903	0.048124	0.297412	-1.74947	down
GO:0000166	nucleotide binding	molecular_function	5	0.0702566	ENSSSCG00000035421	ATP8A2	phospholipid-transporting ATPase IB [Source:NCBI gene;Acc:100523747]	0	0	0	0	0	0.106941	0	0	0.00374038	-8.0626	down
GO:0000166	nucleotide binding	molecular_function	5	0.0702566	ENSSSCG00000040683	ENSSSCG00000040683		0	0	0	0	0.573955	0	0.190963	0.165093	0.000430102	-11.183	down
GO:0050901	leukocyte tethering or rolling	biological_process	8	0.0706882	ENSSSCG00000000257	ITGB7	integrin subunit beta 7 [Source:NCBI gene;Acc:397221]	0.185201	0.227381	0.35861	0.515071	0.180725	0.12515	0.146028	0.18352	2.02426	1.01739	up
GO:0016810	hydrolase activity, acting on carbon-nitrogen (but not peptide) bonds	molecular_function	5	0.0706882	ENSSSCG00000034919	GDA	guanine deaminase [Source:NCBI gene;Acc:100621043]	0	0.044769	0.063896	0.072535	0	0	0	0.009402	19.2725	4.26847	up
GO:0005005	transmembrane-ephrin receptor activity	molecular_function	11	0.0706882	ENSSSCG00000024492	EPHB1	EPH receptor B1 [Source:NCBI gene;Acc:100524585]	0.040072	0.135855	0.125182	0.079682	0.16303	0.106112	0.412634	0.215447	0.424411	-1.23647	down
GO:0006970	response to osmotic stress	biological_process	5	0.0706882	ENSSSCG00000010325	KCNMA1	potassium calcium-activated channel subfamily M alpha 1 [Source:NCBI gene;Acc:397434]	0.11953	0.0259335	0.020903	0.0945038	0.585101	0.119901	0.110312	0.14883	0.270572	-1.88592	down
GO:0050995	negative regulation of lipid catabolic process	biological_process	8	0.0706882	ENSSSCG00000001844	PLIN1	perilipin 1 [Source:NCBI gene;Acc:654411]	0.0876927	0	0.0253353	0.169325	0	0	0	0	705.882	9.46328	up
GO:0008631	intrinsic apoptotic signaling pathway in response to oxidative stress	biological_process	7	0.0706882	ENSSSCG00000040317	SOD2	superoxide dismutase 2 [Source:NCBI gene;Acc:100154319]	440.443	811.833	177.56	447.583	341.528	313.897	96.7074	127.848	2.13348	1.09321	up
GO:0001952	regulation of cell-matrix adhesion	biological_process	7	0.0706882	ENSSSCG00000004540	ONECUT2	one cut homeobox 2 [Source:NCBI gene;Acc:106507181]	0	0	0	0	0	0.043783	0.033285	0.013458	0.00441862	-7.82219	down
GO:2000272	negative regulation of signaling receptor activity	biological_process	9	0.0706882	ENSSSCG00000017557	WFIKKN2	WAP, follistatin/kazal, immunoglobulin, kunitz and netrin domain containing 2 [Source:NCBI gene;Acc:100512012]	0.249887	0.205871	0.126918	0.160349	0.071994	0.093531	0.050522	0.09217	2.41072	1.26946	up
GO:0050863	regulation of T cell activation	biological_process	8	0.0706882	ENSSSCG00000021383	CGAS	cyclic GMP-AMP synthase [Source:NCBI gene;Acc:100516408]	0.211824	0.107048	0	0.176027	0.675164	0.29819	0.213437	0.677419	0.265474	-1.91336	down
GO:0010820	positive regulation of T cell chemotaxis	biological_process	10	0.0706882	ENSSSCG00000026695	TNFSF14	TNF superfamily member 14 [Source:NCBI gene;Acc:100519468]	0.056141	0	0.20312	0.057648	0	0	0	0	792.273	9.62985	up
GO:0060236	regulation of mitotic spindle organization	biological_process	8	0.0706882	ENSSSCG00000031976	ANKRD53	ankyrin repeat domain 53 [Source:NCBI gene;Acc:100739578]	0.0842339	0	0.0529971	0	0	0	0	0	343.078	8.42239	up
GO:0033198	response to ATP	biological_process	8	0.0706882	ENSSSCG00000009735	P2RX2	purinergic receptor P2X 2 [Source:NCBI gene;Acc:100736581]	0	0.124022	0.170384	0.0845002	0	0	0	0	947.265	9.88762	up
GO:0005313	L-glutamate transmembrane transporter activity	molecular_function	8	0.0706882	ENSSSCG00000038946	SLC17A8	solute carrier family 17 member 8 [Source:NCBI gene;Acc:100526221]	0.557141	0.599388	0.741513	0.662693	0.206377	0.366996	0.426302	0.224553	2.09171	1.06469	up
GO:0030166	proteoglycan biosynthetic process	biological_process	9	0.0706882	ENSSSCG00000002658	FOXL1	forkhead box L1 [Source:NCBI gene;Acc:100511634]	1.09758	0.23386	0.197345	0.099179	0.024694	0	0.053966	0.20144	5.81208	2.53905	up
GO:0000340	RNA 7-methylguanosine cap binding	molecular_function	8	0.0706882	ENSSSCG00000014052	EIF4E1B	eukaryotic translation initiation factor 4E family member 1B [Source:NCBI gene;Acc:100523233]	0.188853	0	0.057771	0.658422	0	0	0.033915	0.007078	22.0781	4.46454	up
GO:0060707	trophoblast giant cell differentiation	biological_process	6	0.0706882	ENSSSCG00000031080	HAND1	heart and neural crest derivatives expressed 1 [Source:NCBI gene;Acc:541594]	0.012135	0.076182	0	0.013521	0	0	0	0	254.595	7.99206	up
GO:0032433	filopodium tip	cellular_component	6	0.0706882	ENSSSCG00000024492	EPHB1	EPH receptor B1 [Source:NCBI gene;Acc:100524585]	0.040072	0.135855	0.125182	0.079682	0.16303	0.106112	0.412634	0.215447	0.424411	-1.23647	down
GO:0006497	protein lipidation	biological_process	9	0.0706882	ENSSSCG00000017980	ALOX12B	arachidonate 12-lipoxygenase, 12R type [Source:NCBI gene;Acc:100526246]	0	0	0	0.023422	0.112108	0.169971	0.046735	0.163495	0.0475758	-4.39363	down
GO:0030007	cellular potassium ion homeostasis	biological_process	11	0.0706882	ENSSSCG00000010325	KCNMA1	potassium calcium-activated channel subfamily M alpha 1 [Source:NCBI gene;Acc:397434]	0.11953	0.0259335	0.020903	0.0945038	0.585101	0.119901	0.110312	0.14883	0.270572	-1.88592	down
GO:0061351	neural precursor cell proliferation	biological_process	4	0.0706882	ENSSSCG00000024492	EPHB1	EPH receptor B1 [Source:NCBI gene;Acc:100524585]	0.040072	0.135855	0.125182	0.079682	0.16303	0.106112	0.412634	0.215447	0.424411	-1.23647	down
GO:2000463	positive regulation of excitatory postsynaptic potential	biological_process	9	0.0706882	ENSSSCG00000027654	NETO1	neuropilin and tolloid like 1 [Source:NCBI gene;Acc:100622872]	0.00786498	0.036241	0.0440407	0.0587965	0	0	0	0	367.358	8.52104	up
GO:0022617	extracellular matrix disassembly	biological_process	6	0.0706882	ENSSSCG00000014988	MMP13	matrix metallopeptidase 13 [Source:NCBI gene;Acc:397346]	4.41573	0.779192	2.73243	0.822949	1.12681	0.478646	0.65519	0.178644	3.58723	1.84287	up
GO:0021680	cerebellar Purkinje cell layer development	biological_process	5	0.0706882	ENSSSCG00000013754	CACNA1A	calcium voltage-gated channel subunit alpha1 A [Source:NCBI gene;Acc:100525387]	0.02133	0.00985703	0.0134541	0.0178186	0.0498397	0.0472018	0.0284099	0.0521617	0.351662	-1.50774	down
GO:0050871	positive regulation of B cell activation	biological_process	9	0.0706882	ENSSSCG00000020970	IL6	interleukin 6 [Source:NCBI gene;Acc:399500]	2.51923	2.82316	4.87588	5.13129	5.23923	6.45856	9.15744	20.8768	0.367813	-1.44296	down
GO:0002026	regulation of the force of heart contraction	biological_process	9	0.0706882	ENSSSCG00000034163	PLN	phospholamban [Source:NCBI gene;Acc:397421]	1.31763	0.663593	1.79408	2.5748	6.43865	2.88279	3.72296	8.02146	0.301441	-1.73005	down
GO:0098794	postsynapse	cellular_component	4	0.0750215	ENSSSCG00000009735	P2RX2	purinergic receptor P2X 2 [Source:NCBI gene;Acc:100736581]	0	0.124022	0.170384	0.0845002	0	0	0	0	947.265	9.88762	up
GO:0098794	postsynapse	cellular_component	4	0.0750215	ENSSSCG00000016022	ZNF804A	zinc finger protein 804A [Source:NCBI gene;Acc:100524346]	0.0553859	0.12664	0.189437	0.0925699	0.0276792	0.047276	0.056554	0.0325941	2.82769	1.49962	up
GO:0016020	membrane	cellular_component	3	0.0753309	ENSSSCG00000000257	ITGB7	integrin subunit beta 7 [Source:NCBI gene;Acc:397221]	0.185201	0.227381	0.35861	0.515071	0.180725	0.12515	0.146028	0.18352	2.02426	1.01739	up
GO:0016020	membrane	cellular_component	3	0.0753309	ENSSSCG00000000636	ENSSSCG00000000636	killer cell lectin-like receptor subfamily A, member 1 [Source:NCBI gene;Acc:397612]	0	0.060397	0.115643	0.329598	0	0	0	0	1264.1	10.3039	up
GO:0016020	membrane	cellular_component	3	0.0753309	ENSSSCG00000001616	TREML2	triggering receptor expressed on myeloid cells like 2 [Source:NCBI gene;Acc:100738047]	0.054533	0.06149	0.031063	0.055344	0	0	0	0.017578	11.5161	3.52558	up
GO:0016020	membrane	cellular_component	3	0.0753309	ENSSSCG00000001872	LINGO1	leucine rich repeat and Ig domain containing 1 [Source:NCBI gene;Acc:100155465]	0.100141	0.0945755	0.0313381	0.0508434	0.301034	0.291748	0.0916974	0.132854	0.338782	-1.56157	down
GO:0016020	membrane	cellular_component	3	0.0753309	ENSSSCG00000002927	LRFN3	leucine rich repeat and fibronectin type III domain containing 3 [Source:NCBI gene;Acc:100738610]	0	0	0	0	0.160984	0	0.026081	0.264803	0.000885214	-10.1417	down
GO:0016020	membrane	cellular_component	3	0.0753309	ENSSSCG00000003069	KCNN4	potassium calcium-activated channel subfamily N member 4 [Source:NCBI gene;Acc:397081]	0	0	0.140078	0.105751	0	0	0	0	614.572	9.26344	up
GO:0016020	membrane	cellular_component	3	0.0753309	ENSSSCG00000003386	TNFRSF9	TNF receptor superfamily member 9 [Source:NCBI gene;Acc:100519368]	0.0695877	0.12297	0.188732	0.130953	0.288478	0.336174	0.185547	0.284585	0.467894	-1.09575	down
GO:0016020	membrane	cellular_component	3	0.0753309	ENSSSCG00000003483	ENSSSCG00000003483	peptidyl arginine deiminase 4 [Source:NCBI gene;Acc:100524749]	0.0307738	0	0.256222	0	0	0	0	0	717.489	9.48681	up
GO:0016020	membrane	cellular_component	3	0.0753309	ENSSSCG00000004646	ATP8B4	ATPase phospholipid transporting 8B4 (putative) [Source:NCBI gene;Acc:100154720]	0.0615731	0.45834	0.231173	1.22783	0.154983	0.170382	0.0929394	0.217412	3.11289	1.63825	up
GO:0016020	membrane	cellular_component	3	0.0753309	ENSSSCG00000005584	CRB2	crumbs cell polarity complex component 2 [Source:NCBI gene;Acc:100511431]	0.040431	0.018636	0.010025	0.022794	0	0	0	0.010935	8.40293	3.07089	up
GO:0016020	membrane	cellular_component	3	0.0753309	ENSSSCG00000007728	ENSSSCG00000007728		0.342202	0.29118	0	0.350267	0	0	0	0	2459.12	11.2639	up
GO:0016020	membrane	cellular_component	3	0.0753309	ENSSSCG00000008742	CD38	CD38 molecule [Source:NCBI gene;Acc:100511702]	3.70184	3.39609	0.812398	2.31241	1.78349	1.58737	0.572801	0.953064	2.08767	1.06189	up
GO:0016020	membrane	cellular_component	3	0.0753309	ENSSSCG00000009735	P2RX2	purinergic receptor P2X 2 [Source:NCBI gene;Acc:100736581]	0	0.124022	0.170384	0.0845002	0	0	0	0	947.265	9.88762	up
GO:0016020	membrane	cellular_component	3	0.0753309	ENSSSCG00000009842	CCDC60	coiled-coil domain containing 60 [Source:NCBI gene;Acc:110255219]	0	0.0434374	0.0155037	0.0175279	0.068209	0.172322	0.144952	0.0563136	0.173087	-2.53043	down
GO:0016020	membrane	cellular_component	3	0.0753309	ENSSSCG00000010325	KCNMA1	potassium calcium-activated channel subfamily M alpha 1 [Source:NCBI gene;Acc:397434]	0.11953	0.0259335	0.020903	0.0945038	0.585101	0.119901	0.110312	0.14883	0.270572	-1.88592	down
GO:0016020	membrane	cellular_component	3	0.0753309	ENSSSCG00000011735	SI	sucrase-isomaltase [Source:NCBI gene;Acc:100623884]	0	0	0.126363	0	0	0	0	0	315.907	8.30336	up
GO:0016020	membrane	cellular_component	3	0.0753309	ENSSSCG00000013754	CACNA1A	calcium voltage-gated channel subunit alpha1 A [Source:NCBI gene;Acc:100525387]	0.02133	0.00985703	0.0134541	0.0178186	0.0498397	0.0472018	0.0284099	0.0521617	0.351662	-1.50774	down
GO:0016020	membrane	cellular_component	3	0.0753309	ENSSSCG00000015205	HEPACAM	hepatic and glial cell adhesion molecule [Source:NCBI gene;Acc:100523198]	0.566281	0	0	0	0	0	0	0	1415.7	10.4673	up
GO:0016020	membrane	cellular_component	3	0.0753309	ENSSSCG00000016247	TM4SF20	transmembrane 4 L six family member 20 [Source:NCBI gene;Acc:100513630]	0.45096	0.388991	0.206182	0.350654	0.064814	0.204073	0.141277	0.062815	2.95317	1.56226	up
GO:0016020	membrane	cellular_component	3	0.0753309	ENSSSCG00000017344	FAM187A	Ig-like V-type domain-containing protein FAM187A [Source:NCBI gene;Acc:102165039]	0.039504	0.094386	0.020916	0.038273	0.166873	0.206154	0.068747	0.133034	0.335902	-1.57389	down
GO:0016020	membrane	cellular_component	3	0.0753309	ENSSSCG00000017583	SGCA	sarcoglycan alpha [Source:NCBI gene;Acc:100240723]	0	0	0.007643	0	0.088343	0.0481123	0	0.048865	0.0412421	-4.59974	down
GO:0016020	membrane	cellular_component	3	0.0753309	ENSSSCG00000021315	ENSSSCG00000021315	neurexin 3 [Source:NCBI gene;Acc:100620189]	0	0.0829555	0.028664	0.0390683	0	0	0	0	376.72	8.55735	up
GO:0016020	membrane	cellular_component	3	0.0753309	ENSSSCG00000022961	CLMP	CXADR like membrane protein [Source:NCBI gene;Acc:100512427]	13.811	22.0358	38.0115	16.4248	11.3576	12.5107	8.55634	8.44736	2.20892	1.14334	up
GO:0016020	membrane	cellular_component	3	0.0753309	ENSSSCG00000024492	EPHB1	EPH receptor B1 [Source:NCBI gene;Acc:100524585]	0.040072	0.135855	0.125182	0.079682	0.16303	0.106112	0.412634	0.215447	0.424411	-1.23647	down
GO:0016020	membrane	cellular_component	3	0.0753309	ENSSSCG00000026203	NXPE4	neurexophilin and PC-esterase domain family member 4 [Source:HGNC Symbol;Acc:HGNC:23117]	0.155183	0	0.052175	0.054843	0	0	0	0	655.503	9.35646	up
GO:0016020	membrane	cellular_component	3	0.0753309	ENSSSCG00000026695	TNFSF14	TNF superfamily member 14 [Source:NCBI gene;Acc:100519468]	0.056141	0	0.20312	0.057648	0	0	0	0	792.273	9.62985	up
GO:0016020	membrane	cellular_component	3	0.0753309	ENSSSCG00000026754	ATCAY	ATCAY, caytaxin [Source:NCBI gene;Acc:100626830]	0	0	0	0	0.089454	0	0.032815	0.015637	0.00290053	-8.42947	down
GO:0016020	membrane	cellular_component	3	0.0753309	ENSSSCG00000027654	NETO1	neuropilin and tolloid like 1 [Source:NCBI gene;Acc:100622872]	0.00786498	0.036241	0.0440407	0.0587965	0	0	0	0	367.358	8.52104	up
GO:0016020	membrane	cellular_component	3	0.0753309	ENSSSCG00000027768	SLC29A4	solute carrier family 29 member 4 [Source:NCBI gene;Acc:100624843]	0.07378	0.054982	0.041073	0	0.270753	0.039272	0.15353	0.3182	0.217248	-2.20258	down
GO:0016020	membrane	cellular_component	3	0.0753309	ENSSSCG00000029651	SLN	sarcolipin [Source:NCBI gene;Acc:733627]	0.037571	0	0.047445	0.08046	0.377891	0.210467	0.117272	0.131093	0.197767	-2.33813	down
GO:0016020	membrane	cellular_component	3	0.0753309	ENSSSCG00000032113	ENSSSCG00000032113	cationic amino acid transporter 3-like [Source:NCBI gene;Acc:100523440]	0	0	0	0	0.016327	0.0105538	0.0168877	0	0.00913901	-6.77375	down
GO:0016020	membrane	cellular_component	3	0.0753309	ENSSSCG00000034163	PLN	phospholamban [Source:NCBI gene;Acc:397421]	1.31763	0.663593	1.79408	2.5748	6.43865	2.88279	3.72296	8.02146	0.301441	-1.73005	down
GO:0016020	membrane	cellular_component	3	0.0753309	ENSSSCG00000035421	ATP8A2	phospholipid-transporting ATPase IB [Source:NCBI gene;Acc:100523747]	0	0	0	0	0	0.106941	0	0	0.00374038	-8.0626	down
GO:0016020	membrane	cellular_component	3	0.0753309	ENSSSCG00000035727	SURF1	surfeit locus protein 1 [Source:NCBI gene;Acc:110256505]	0.794258	1.0833	1.13023	0.666506	1.04102	2.86432	6.53336	7.01648	0.210499	-2.24811	down
GO:0016020	membrane	cellular_component	3	0.0753309	ENSSSCG00000036943	C11orf87	chromosome 9 C11orf87 homolog [Source:NCBI gene;Acc:100511522]	0.0371482	0.0509585	0.0122638	0.0598969	0.1157	0.13972	0.0559597	0.106415	0.383603	-1.38231	down
GO:0016020	membrane	cellular_component	3	0.0753309	ENSSSCG00000037432	PLPPR3	phospholipid phosphatase related 3 [Source:NCBI gene;Acc:100511492]	3.0049	0.399797	2.07203	1.03282	0.489968	0.264633	0.726331	0.577819	3.16189	1.66079	up
GO:0016020	membrane	cellular_component	3	0.0753309	ENSSSCG00000038602	ENSSSCG00000038602	SOGA family member 3 [Source:NCBI gene;Acc:100512321]	0.0284553	0.0253097	0	0.0190802	0.0613501	0.163273	0.0555039	0.0590117	0.214794	-2.21897	down
GO:0016020	membrane	cellular_component	3	0.0753309	ENSSSCG00000038946	SLC17A8	solute carrier family 17 member 8 [Source:NCBI gene;Acc:100526221]	0.557141	0.599388	0.741513	0.662693	0.206377	0.366996	0.426302	0.224553	2.09171	1.06469	up
GO:0016020	membrane	cellular_component	3	0.0753309	ENSSSCG00000039358	SUSD5	sushi domain containing 5 [Source:NCBI gene;Acc:110256562]	0.147395	0.083949	0.045907	0.068649	0.366809	0.158018	0.139422	0.169267	0.414989	-1.26885	down
GO:0016020	membrane	cellular_component	3	0.0753309	ENSSSCG00000040746	LRP2	LDL receptor related protein 2 [Source:NCBI gene;Acc:100519689]	0.295167	0.701586	0.542765	0.959293	0.184023	0.427094	0.234247	0.380174	2.03895	1.02783	up
GO:0005639	integral component of nuclear inner membrane	cellular_component	7	0.0768634	ENSSSCG00000009735	P2RX2	purinergic receptor P2X 2 [Source:NCBI gene;Acc:100736581]	0	0.124022	0.170384	0.0845002	0	0	0	0	947.265	9.88762	up
GO:0015813	L-glutamate transmembrane transport	biological_process	11	0.0768634	ENSSSCG00000038946	SLC17A8	solute carrier family 17 member 8 [Source:NCBI gene;Acc:100526221]	0.557141	0.599388	0.741513	0.662693	0.206377	0.366996	0.426302	0.224553	2.09171	1.06469	up
GO:0060997	dendritic spine morphogenesis	biological_process	8	0.0768634	ENSSSCG00000024492	EPHB1	EPH receptor B1 [Source:NCBI gene;Acc:100524585]	0.040072	0.135855	0.125182	0.079682	0.16303	0.106112	0.412634	0.215447	0.424411	-1.23647	down
GO:0034364	high-density lipoprotein particle	cellular_component	5	0.0768634	ENSSSCG00000037358	ENSSSCG00000037358	serum amyloid A-3 protein [Source:NCBI gene;Acc:733603]	16.2985	26.5234	0.799804	11.4058	5.65267	2.30216	0.073928	0.729559	6.28289	2.65143	up
GO:0042755	eating behavior	biological_process	5	0.0768634	ENSSSCG00000035421	ATP8A2	phospholipid-transporting ATPase IB [Source:NCBI gene;Acc:100523747]	0	0	0	0	0	0.106941	0	0	0.00374038	-8.0626	down
GO:0046889	positive regulation of lipid biosynthetic process	biological_process	8	0.0768634	ENSSSCG00000011110	CCDC3	coiled-coil domain-containing protein 3 [Source:NCBI gene;Acc:100510975]	2.75071	0.930901	0.982636	0.802897	8.75776	1.4694	0.913093	5.07058	0.337253	-1.5681	down
GO:0060411	cardiac septum morphogenesis	biological_process	5	0.0768634	ENSSSCG00000031080	HAND1	heart and neural crest derivatives expressed 1 [Source:NCBI gene;Acc:541594]	0.012135	0.076182	0	0.013521	0	0	0	0	254.595	7.99206	up
GO:0070102	interleukin-6-mediated signaling pathway	biological_process	7	0.0768634	ENSSSCG00000020970	IL6	interleukin 6 [Source:NCBI gene;Acc:399500]	2.51923	2.82316	4.87588	5.13129	5.23923	6.45856	9.15744	20.8768	0.367813	-1.44296	down
GO:0034122	negative regulation of toll-like receptor signaling pathway	biological_process	7	0.0768634	ENSSSCG00000014561	NLRP6	NLR family pyrin domain containing 6 [Source:NCBI gene;Acc:100519245]	0.104384	0.039459	0.016589	0.052776	0.51811	0.05228	0.071686	0.125618	0.277725	-1.84827	down
GO:0050909	sensory perception of taste	biological_process	8	0.0768634	ENSSSCG00000009735	P2RX2	purinergic receptor P2X 2 [Source:NCBI gene;Acc:100736581]	0	0.124022	0.170384	0.0845002	0	0	0	0	947.265	9.88762	up
GO:0050884	neuromuscular process controlling posture	biological_process	7	0.0768634	ENSSSCG00000035421	ATP8A2	phospholipid-transporting ATPase IB [Source:NCBI gene;Acc:100523747]	0	0	0	0	0	0.106941	0	0	0.00374038	-8.0626	down
GO:0007602	phototransduction	biological_process	5	0.0768634	ENSSSCG00000001636	GUCA1A	guanylate cyclase activator 1A [Source:NCBI gene;Acc:100739200]	0.062988	0.164763	0.236424	0.111331	0.353288	0.30342	0.380666	0.222057	0.456957	-1.12987	down
GO:0042311	vasodilation	biological_process	10	0.0768634	ENSSSCG00000040317	SOD2	superoxide dismutase 2 [Source:NCBI gene;Acc:100154319]	440.443	811.833	177.56	447.583	341.528	313.897	96.7074	127.848	2.13348	1.09321	up
GO:0072358	cardiovascular system development	biological_process	6	0.0768634	ENSSSCG00000005584	CRB2	crumbs cell polarity complex component 2 [Source:NCBI gene;Acc:100511431]	0.040431	0.018636	0.010025	0.022794	0	0	0	0.010935	8.40293	3.07089	up
GO:0033017	sarcoplasmic reticulum membrane	cellular_component	6	0.0768634	ENSSSCG00000034163	PLN	phospholamban [Source:NCBI gene;Acc:397421]	1.31763	0.663593	1.79408	2.5748	6.43865	2.88279	3.72296	8.02146	0.301441	-1.73005	down
GO:0071360	cellular response to exogenous dsRNA	biological_process	9	0.0768634	ENSSSCG00000021383	CGAS	cyclic GMP-AMP synthase [Source:NCBI gene;Acc:100516408]	0.211824	0.107048	0	0.176027	0.675164	0.29819	0.213437	0.677419	0.265474	-1.91336	down
GO:0033138	positive regulation of peptidyl-serine phosphorylation	biological_process	11	0.0788673	ENSSSCG00000020970	IL6	interleukin 6 [Source:NCBI gene;Acc:399500]	2.51923	2.82316	4.87588	5.13129	5.23923	6.45856	9.15744	20.8768	0.367813	-1.44296	down
GO:0033138	positive regulation of peptidyl-serine phosphorylation	biological_process	11	0.0788673	ENSSSCG00000037358	ENSSSCG00000037358	serum amyloid A-3 protein [Source:NCBI gene;Acc:733603]	16.2985	26.5234	0.799804	11.4058	5.65267	2.30216	0.073928	0.729559	6.28289	2.65143	up
GO:0005125	cytokine activity	molecular_function	7	0.0793213	ENSSSCG00000020970	IL6	interleukin 6 [Source:NCBI gene;Acc:399500]	2.51923	2.82316	4.87588	5.13129	5.23923	6.45856	9.15744	20.8768	0.367813	-1.44296	down
GO:0005125	cytokine activity	molecular_function	7	0.0793213	ENSSSCG00000026695	TNFSF14	TNF superfamily member 14 [Source:NCBI gene;Acc:100519468]	0.056141	0	0.20312	0.057648	0	0	0	0	792.273	9.62985	up
GO:0005125	cytokine activity	molecular_function	7	0.0793213	ENSSSCG00000031022	IFN-DELTA-7	interferon delta 7 [Source:NCBI gene;Acc:100303727]	0.262573	0.106276	0.0713	0.396111	0	0	0	0	2090.65	11.0297	up
GO:0060326	cell chemotaxis	biological_process	6	0.0808131	ENSSSCG00000024492	EPHB1	EPH receptor B1 [Source:NCBI gene;Acc:100524585]	0.040072	0.135855	0.125182	0.079682	0.16303	0.106112	0.412634	0.215447	0.424411	-1.23647	down
GO:0060326	cell chemotaxis	biological_process	6	0.0808131	ENSSSCG00000037358	ENSSSCG00000037358	serum amyloid A-3 protein [Source:NCBI gene;Acc:733603]	16.2985	26.5234	0.799804	11.4058	5.65267	2.30216	0.073928	0.729559	6.28289	2.65143	up
GO:0031966	mitochondrial membrane	cellular_component	5	0.0827738	ENSSSCG00000026754	ATCAY	ATCAY, caytaxin [Source:NCBI gene;Acc:100626830]	0	0	0	0	0.089454	0	0.032815	0.015637	0.00290053	-8.42947	down
GO:0031966	mitochondrial membrane	cellular_component	5	0.0827738	ENSSSCG00000034163	PLN	phospholamban [Source:NCBI gene;Acc:397421]	1.31763	0.663593	1.79408	2.5748	6.43865	2.88279	3.72296	8.02146	0.301441	-1.73005	down
GO:0060996	dendritic spine development	biological_process	5	0.082998	ENSSSCG00000024492	EPHB1	EPH receptor B1 [Source:NCBI gene;Acc:100524585]	0.040072	0.135855	0.125182	0.079682	0.16303	0.106112	0.412634	0.215447	0.424411	-1.23647	down
GO:0030322	stabilization of membrane potential	biological_process	6	0.082998	ENSSSCG00000003069	KCNN4	potassium calcium-activated channel subfamily N member 4 [Source:NCBI gene;Acc:397081]	0	0	0.140078	0.105751	0	0	0	0	614.572	9.26344	up
GO:0051213	dioxygenase activity	molecular_function	5	0.082998	ENSSSCG00000017980	ALOX12B	arachidonate 12-lipoxygenase, 12R type [Source:NCBI gene;Acc:100526246]	0	0	0	0.023422	0.112108	0.169971	0.046735	0.163495	0.0475758	-4.39363	down
GO:0006865	amino acid transport	biological_process	10	0.082998	ENSSSCG00000032113	ENSSSCG00000032113	cationic amino acid transporter 3-like [Source:NCBI gene;Acc:100523440]	0	0	0	0	0.016327	0.0105538	0.0168877	0	0.00913901	-6.77375	down
GO:0005003	ephrin receptor activity	molecular_function	10	0.082998	ENSSSCG00000024492	EPHB1	EPH receptor B1 [Source:NCBI gene;Acc:100524585]	0.040072	0.135855	0.125182	0.079682	0.16303	0.106112	0.412634	0.215447	0.424411	-1.23647	down
GO:0060076	excitatory synapse	cellular_component	4	0.082998	ENSSSCG00000027654	NETO1	neuropilin and tolloid like 1 [Source:NCBI gene;Acc:100622872]	0.00786498	0.036241	0.0440407	0.0587965	0	0	0	0	367.358	8.52104	up
GO:0008553	proton-exporting ATPase activity, phosphorylative mechanism	molecular_function	10	0.082998	ENSSSCG00000001401	ENSSSCG00000001401	ATPase H+ transporting V1 subunit G2 [Source:NCBI gene;Acc:100152358]	0.076847	0.137269	0.14906	0.045167	0.263849	0.368966	0.395026	0.27871	0.312535	-1.67791	down
GO:0050908	detection of light stimulus involved in visual perception	biological_process	9	0.082998	ENSSSCG00000035421	ATP8A2	phospholipid-transporting ATPase IB [Source:NCBI gene;Acc:100523747]	0	0	0	0	0	0.106941	0	0	0.00374038	-8.0626	down
GO:0050862	positive regulation of T cell receptor signaling pathway	biological_process	10	0.082998	ENSSSCG00000003069	KCNN4	potassium calcium-activated channel subfamily N member 4 [Source:NCBI gene;Acc:397081]	0	0	0.140078	0.105751	0	0	0	0	614.572	9.26344	up
GO:1901214	regulation of neuron death	biological_process	7	0.082998	ENSSSCG00000024492	EPHB1	EPH receptor B1 [Source:NCBI gene;Acc:100524585]	0.040072	0.135855	0.125182	0.079682	0.16303	0.106112	0.412634	0.215447	0.424411	-1.23647	down
GO:0048791	calcium ion-regulated exocytosis of neurotransmitter	biological_process	10	0.082998	ENSSSCG00000013754	CACNA1A	calcium voltage-gated channel subunit alpha1 A [Source:NCBI gene;Acc:100525387]	0.02133	0.00985703	0.0134541	0.0178186	0.0498397	0.0472018	0.0284099	0.0521617	0.351662	-1.50774	down
GO:0001666	response to hypoxia	biological_process	5	0.0887423	ENSSSCG00000009735	P2RX2	purinergic receptor P2X 2 [Source:NCBI gene;Acc:100736581]	0	0.124022	0.170384	0.0845002	0	0	0	0	947.265	9.88762	up
GO:0001666	response to hypoxia	biological_process	5	0.0887423	ENSSSCG00000010325	KCNMA1	potassium calcium-activated channel subfamily M alpha 1 [Source:NCBI gene;Acc:397434]	0.11953	0.0259335	0.020903	0.0945038	0.585101	0.119901	0.110312	0.14883	0.270572	-1.88592	down
GO:0004198	calcium-dependent cysteine-type endopeptidase activity	molecular_function	9	0.0890921	ENSSSCG00000034746	CAPN8	calpain 8 [Source:NCBI gene;Acc:100625563]	0	0	0	0	0	0.211644	0.0716674	0.528428	0.000492769	-10.9868	down
GO:0048738	cardiac muscle tissue development	biological_process	8	0.0890921	ENSSSCG00000034163	PLN	phospholamban [Source:NCBI gene;Acc:397421]	1.31763	0.663593	1.79408	2.5748	6.43865	2.88279	3.72296	8.02146	0.301441	-1.73005	down
GO:0001836	release of cytochrome c from mitochondria	biological_process	8	0.0890921	ENSSSCG00000040317	SOD2	superoxide dismutase 2 [Source:NCBI gene;Acc:100154319]	440.443	811.833	177.56	447.583	341.528	313.897	96.7074	127.848	2.13348	1.09321	up
GO:0032481	positive regulation of type I interferon production	biological_process	8	0.0890921	ENSSSCG00000021383	CGAS	cyclic GMP-AMP synthase [Source:NCBI gene;Acc:100516408]	0.211824	0.107048	0	0.176027	0.675164	0.29819	0.213437	0.677419	0.265474	-1.91336	down
GO:0016702	oxidoreductase activity, acting on single donors with incorporation of molecular oxygen, incorporation of two atoms of oxygen	molecular_function	6	0.0890921	ENSSSCG00000017980	ALOX12B	arachidonate 12-lipoxygenase, 12R type [Source:NCBI gene;Acc:100526246]	0	0	0	0.023422	0.112108	0.169971	0.046735	0.163495	0.0475758	-4.39363	down
GO:0036158	outer dynein arm assembly	biological_process	9	0.0890921	ENSSSCG00000011069	ARMC4	armadillo repeat containing 4 [Source:NCBI gene;Acc:100516925]	0.0158597	0.0121004	0	0	0.0386265	0.0782197	0.0455913	0.0130502	0.159328	-2.64993	down
GO:0035050	embryonic heart tube development	biological_process	6	0.0890921	ENSSSCG00000031080	HAND1	heart and neural crest derivatives expressed 1 [Source:NCBI gene;Acc:541594]	0.012135	0.076182	0	0.013521	0	0	0	0	254.595	7.99206	up
GO:0010842	retina layer formation	biological_process	5	0.0890921	ENSSSCG00000035421	ATP8A2	phospholipid-transporting ATPase IB [Source:NCBI gene;Acc:100523747]	0	0	0	0	0	0.106941	0	0	0.00374038	-8.0626	down
GO:0034341	response to interferon-gamma	biological_process	7	0.0890921	ENSSSCG00000007964	ENSSSCG00000007964	MEFV, pyrin innate immunity regulator [Source:NCBI gene;Acc:100517333]	0.506142	0.41965	0.203777	0.837334	0.18061	0.282563	0.186357	0.178046	2.3767	1.24896	up
GO:0016471	vacuolar proton-transporting V-type ATPase complex	cellular_component	7	0.0890921	ENSSSCG00000001401	ENSSSCG00000001401	ATPase H+ transporting V1 subunit G2 [Source:NCBI gene;Acc:100152358]	0.076847	0.137269	0.14906	0.045167	0.263849	0.368966	0.395026	0.27871	0.312535	-1.67791	down
GO:0006801	superoxide metabolic process	biological_process	6	0.0890921	ENSSSCG00000040317	SOD2	superoxide dismutase 2 [Source:NCBI gene;Acc:100154319]	440.443	811.833	177.56	447.583	341.528	313.897	96.7074	127.848	2.13348	1.09321	up
GO:0031290	retinal ganglion cell axon guidance	biological_process	7	0.0890921	ENSSSCG00000024492	EPHB1	EPH receptor B1 [Source:NCBI gene;Acc:100524585]	0.040072	0.135855	0.125182	0.079682	0.16303	0.106112	0.412634	0.215447	0.424411	-1.23647	down
GO:1904706	negative regulation of vascular smooth muscle cell proliferation	biological_process	9	0.0890921	ENSSSCG00000013614	CNN1	calponin 1 [Source:NCBI gene;Acc:396911]	1.8584	0.382009	0.861651	0.879024	5.86686	0.486716	0.474544	6.63602	0.29568	-1.75789	down
GO:0033617	mitochondrial respiratory chain complex IV assembly	biological_process	10	0.0890921	ENSSSCG00000035727	SURF1	surfeit locus protein 1 [Source:NCBI gene;Acc:110256505]	0.794258	1.0833	1.13023	0.666506	1.04102	2.86432	6.53336	7.01648	0.210499	-2.24811	down
GO:0005509	calcium ion binding	molecular_function	7	0.091313	ENSSSCG00000001636	GUCA1A	guanylate cyclase activator 1A [Source:NCBI gene;Acc:100739200]	0.062988	0.164763	0.236424	0.111331	0.353288	0.30342	0.380666	0.222057	0.456957	-1.12987	down
GO:0005509	calcium ion binding	molecular_function	7	0.091313	ENSSSCG00000003483	ENSSSCG00000003483	peptidyl arginine deiminase 4 [Source:NCBI gene;Acc:100524749]	0.0307738	0	0.256222	0	0	0	0	0	717.489	9.48681	up
GO:0005509	calcium ion binding	molecular_function	7	0.091313	ENSSSCG00000005584	CRB2	crumbs cell polarity complex component 2 [Source:NCBI gene;Acc:100511431]	0.040431	0.018636	0.010025	0.022794	0	0	0	0.010935	8.40293	3.07089	up
GO:0005509	calcium ion binding	molecular_function	7	0.091313	ENSSSCG00000014988	MMP13	matrix metallopeptidase 13 [Source:NCBI gene;Acc:397346]	4.41573	0.779192	2.73243	0.822949	1.12681	0.478646	0.65519	0.178644	3.58723	1.84287	up
GO:0005509	calcium ion binding	molecular_function	7	0.091313	ENSSSCG00000017583	SGCA	sarcoglycan alpha [Source:NCBI gene;Acc:100240723]	0	0	0.007643	0	0.088343	0.0481123	0	0.048865	0.0412421	-4.59974	down
GO:0005509	calcium ion binding	molecular_function	7	0.091313	ENSSSCG00000034746	CAPN8	calpain 8 [Source:NCBI gene;Acc:100625563]	0	0	0	0	0	0.211644	0.0716674	0.528428	0.000492769	-10.9868	down
GO:0005509	calcium ion binding	molecular_function	7	0.091313	ENSSSCG00000040746	LRP2	LDL receptor related protein 2 [Source:NCBI gene;Acc:100519689]	0.295167	0.701586	0.542765	0.959293	0.184023	0.427094	0.234247	0.380174	2.03895	1.02783	up
GO:0006915	apoptotic process	biological_process	6	0.0919152	ENSSSCG00000003386	TNFRSF9	TNF receptor superfamily member 9 [Source:NCBI gene;Acc:100519368]	0.0695877	0.12297	0.188732	0.130953	0.288478	0.336174	0.185547	0.284585	0.467894	-1.09575	down
GO:0006915	apoptotic process	biological_process	6	0.0919152	ENSSSCG00000026695	TNFSF14	TNF superfamily member 14 [Source:NCBI gene;Acc:100519468]	0.056141	0	0.20312	0.057648	0	0	0	0	792.273	9.62985	up
GO:0006915	apoptotic process	biological_process	6	0.0919152	ENSSSCG00000026754	ATCAY	ATCAY, caytaxin [Source:NCBI gene;Acc:100626830]	0	0	0	0	0.089454	0	0.032815	0.015637	0.00290053	-8.42947	down
GO:0003779	actin binding	molecular_function	6	0.0939638	ENSSSCG00000007964	ENSSSCG00000007964	MEFV, pyrin innate immunity regulator [Source:NCBI gene;Acc:100517333]	0.506142	0.41965	0.203777	0.837334	0.18061	0.282563	0.186357	0.178046	2.3767	1.24896	up
GO:0003779	actin binding	molecular_function	6	0.0939638	ENSSSCG00000009543	MYO16	myosin XVI [Source:NCBI gene;Acc:102161679]	0	0.044785	0	0.127558	0	0	0	0	430.858	8.75107	up
GO:0003779	actin binding	molecular_function	6	0.0939638	ENSSSCG00000010325	KCNMA1	potassium calcium-activated channel subfamily M alpha 1 [Source:NCBI gene;Acc:397434]	0.11953	0.0259335	0.020903	0.0945038	0.585101	0.119901	0.110312	0.14883	0.270572	-1.88592	down
GO:0003779	actin binding	molecular_function	6	0.0939638	ENSSSCG00000013614	CNN1	calponin 1 [Source:NCBI gene;Acc:396911]	1.8584	0.382009	0.861651	0.879024	5.86686	0.486716	0.474544	6.63602	0.29568	-1.75789	down
GO:0007219	Notch signaling pathway	biological_process	6	0.0948349	ENSSSCG00000034163	PLN	phospholamban [Source:NCBI gene;Acc:397421]	1.31763	0.663593	1.79408	2.5748	6.43865	2.88279	3.72296	8.02146	0.301441	-1.73005	down
GO:0007219	Notch signaling pathway	biological_process	6	0.0948349	ENSSSCG00000039358	SUSD5	sushi domain containing 5 [Source:NCBI gene;Acc:110256562]	0.147395	0.083949	0.045907	0.068649	0.366809	0.158018	0.139422	0.169267	0.414989	-1.26885	down
GO:0045197	establishment or maintenance of epithelial cell apical/basal polarity	biological_process	7	0.0951462	ENSSSCG00000005584	CRB2	crumbs cell polarity complex component 2 [Source:NCBI gene;Acc:100511431]	0.040431	0.018636	0.010025	0.022794	0	0	0	0.010935	8.40293	3.07089	up
GO:0019226	transmission of nerve impulse	biological_process	5	0.0951462	ENSSSCG00000013754	CACNA1A	calcium voltage-gated channel subunit alpha1 A [Source:NCBI gene;Acc:100525387]	0.02133	0.00985703	0.0134541	0.0178186	0.0498397	0.0472018	0.0284099	0.0521617	0.351662	-1.50774	down
GO:0098839	postsynaptic density membrane	cellular_component	5	0.0951462	ENSSSCG00000027654	NETO1	neuropilin and tolloid like 1 [Source:NCBI gene;Acc:100622872]	0.00786498	0.036241	0.0440407	0.0587965	0	0	0	0	367.358	8.52104	up
GO:0043198	dendritic shaft	cellular_component	5	0.0951462	ENSSSCG00000016022	ZNF804A	zinc finger protein 804A [Source:NCBI gene;Acc:100524346]	0.0553859	0.12664	0.189437	0.0925699	0.0276792	0.047276	0.056554	0.0325941	2.82769	1.49962	up
GO:0005875	microtubule associated complex	cellular_component	4	0.0951462	ENSSSCG00000007964	ENSSSCG00000007964	MEFV, pyrin innate immunity regulator [Source:NCBI gene;Acc:100517333]	0.506142	0.41965	0.203777	0.837334	0.18061	0.282563	0.186357	0.178046	2.3767	1.24896	up
GO:0061436	establishment of skin barrier	biological_process	10	0.0951462	ENSSSCG00000017980	ALOX12B	arachidonate 12-lipoxygenase, 12R type [Source:NCBI gene;Acc:100526246]	0	0	0	0.023422	0.112108	0.169971	0.046735	0.163495	0.0475758	-4.39363	down
GO:1901741	positive regulation of myoblast fusion	biological_process	11	0.0951462	ENSSSCG00000026695	TNFSF14	TNF superfamily member 14 [Source:NCBI gene;Acc:100519468]	0.056141	0	0.20312	0.057648	0	0	0	0	792.273	9.62985	up
GO:0007568	aging	biological_process	4	0.0951462	ENSSSCG00000035421	ATP8A2	phospholipid-transporting ATPase IB [Source:NCBI gene;Acc:100523747]	0	0	0	0	0	0.106941	0	0	0.00374038	-8.0626	down
GO:0008016	regulation of heart contraction	biological_process	8	0.0951462	ENSSSCG00000034163	PLN	phospholamban [Source:NCBI gene;Acc:397421]	1.31763	0.663593	1.79408	2.5748	6.43865	2.88279	3.72296	8.02146	0.301441	-1.73005	down
GO:0048169	regulation of long-term neuronal synaptic plasticity	biological_process	11	0.10116	ENSSSCG00000027654	NETO1	neuropilin and tolloid like 1 [Source:NCBI gene;Acc:100622872]	0.00786498	0.036241	0.0440407	0.0587965	0	0	0	0	367.358	8.52104	up
GO:0006665	sphingolipid metabolic process	biological_process	8	0.10116	ENSSSCG00000017980	ALOX12B	arachidonate 12-lipoxygenase, 12R type [Source:NCBI gene;Acc:100526246]	0	0	0	0.023422	0.112108	0.169971	0.046735	0.163495	0.0475758	-4.39363	down
GO:0031018	endocrine pancreas development	biological_process	5	0.10116	ENSSSCG00000004540	ONECUT2	one cut homeobox 2 [Source:NCBI gene;Acc:106507181]	0	0	0	0	0	0.043783	0.033285	0.013458	0.00441862	-7.82219	down
GO:0046328	regulation of JNK cascade	biological_process	12	0.10116	ENSSSCG00000024492	EPHB1	EPH receptor B1 [Source:NCBI gene;Acc:100524585]	0.040072	0.135855	0.125182	0.079682	0.16303	0.106112	0.412634	0.215447	0.424411	-1.23647	down
GO:0008637	apoptotic mitochondrial changes	biological_process	7	0.10116	ENSSSCG00000040317	SOD2	superoxide dismutase 2 [Source:NCBI gene;Acc:100154319]	440.443	811.833	177.56	447.583	341.528	313.897	96.7074	127.848	2.13348	1.09321	up
GO:0045663	positive regulation of myoblast differentiation	biological_process	8	0.10116	ENSSSCG00000026695	TNFSF14	TNF superfamily member 14 [Source:NCBI gene;Acc:100519468]	0.056141	0	0.20312	0.057648	0	0	0	0	792.273	9.62985	up
GO:0048255	mRNA stabilization	biological_process	11	0.10116	ENSSSCG00000008994	RBM46	RNA binding motif protein 46 [Source:NCBI gene;Acc:100513804]	0.226085	0.477236	0.25283	0.359355	0.129895	0.171487	0.142992	0.128662	2.29567	1.19892	up
GO:0045861	negative regulation of proteolysis	biological_process	9	0.10116	ENSSSCG00000016247	TM4SF20	transmembrane 4 L six family member 20 [Source:NCBI gene;Acc:100513630]	0.45096	0.388991	0.206182	0.350654	0.064814	0.204073	0.141277	0.062815	2.95317	1.56226	up
GO:0030517	negative regulation of axon extension	biological_process	8	0.10116	ENSSSCG00000003423	DRAXIN	dorsal inhibitory axon guidance protein [Source:NCBI gene;Acc:100524629]	0.00774	0.008041	0.015319	0.025872	0	0	0	0	142.43	7.15411	up
GO:0032722	positive regulation of chemokine production	biological_process	8	0.10116	ENSSSCG00000020970	IL6	interleukin 6 [Source:NCBI gene;Acc:399500]	2.51923	2.82316	4.87588	5.13129	5.23923	6.45856	9.15744	20.8768	0.367813	-1.44296	down
GO:0030111	regulation of Wnt signaling pathway	biological_process	8	0.10116	ENSSSCG00000002658	FOXL1	forkhead box L1 [Source:NCBI gene;Acc:100511634]	1.09758	0.23386	0.197345	0.099179	0.024694	0	0.053966	0.20144	5.81208	2.53905	up
GO:0031589	cell-substrate adhesion	biological_process	5	0.10116	ENSSSCG00000024492	EPHB1	EPH receptor B1 [Source:NCBI gene;Acc:100524585]	0.040072	0.135855	0.125182	0.079682	0.16303	0.106112	0.412634	0.215447	0.424411	-1.23647	down
GO:0005216	ion channel activity	molecular_function	6	0.10666	ENSSSCG00000009735	P2RX2	purinergic receptor P2X 2 [Source:NCBI gene;Acc:100736581]	0	0.124022	0.170384	0.0845002	0	0	0	0	947.265	9.88762	up
GO:0005216	ion channel activity	molecular_function	6	0.10666	ENSSSCG00000010325	KCNMA1	potassium calcium-activated channel subfamily M alpha 1 [Source:NCBI gene;Acc:397434]	0.11953	0.0259335	0.020903	0.0945038	0.585101	0.119901	0.110312	0.14883	0.270572	-1.88592	down
GO:0005216	ion channel activity	molecular_function	6	0.10666	ENSSSCG00000013754	CACNA1A	calcium voltage-gated channel subunit alpha1 A [Source:NCBI gene;Acc:100525387]	0.02133	0.00985703	0.0134541	0.0178186	0.0498397	0.0472018	0.0284099	0.0521617	0.351662	-1.50774	down
GO:0035255	ionotropic glutamate receptor binding	molecular_function	7	0.107135	ENSSSCG00000027654	NETO1	neuropilin and tolloid like 1 [Source:NCBI gene;Acc:100622872]	0.00786498	0.036241	0.0440407	0.0587965	0	0	0	0	367.358	8.52104	up
GO:0033627	cell adhesion mediated by integrin	biological_process	5	0.107135	ENSSSCG00000000257	ITGB7	integrin subunit beta 7 [Source:NCBI gene;Acc:397221]	0.185201	0.227381	0.35861	0.515071	0.180725	0.12515	0.146028	0.18352	2.02426	1.01739	up
GO:0031116	positive regulation of microtubule polymerization	biological_process	10	0.107135	ENSSSCG00000031976	ANKRD53	ankyrin repeat domain 53 [Source:NCBI gene;Acc:100739578]	0.0842339	0	0.0529971	0	0	0	0	0	343.078	8.42239	up
GO:0097225	sperm midpiece	cellular_component	5	0.107135	ENSSSCG00000021645	MROH2B	maestro heat like repeat family member 2B [Source:NCBI gene;Acc:100521872]	0.031199	0.040556	0.017084	0	0	0	0	0	222.097	7.79505	up
GO:0034113	heterotypic cell-cell adhesion	biological_process	6	0.107135	ENSSSCG00000000257	ITGB7	integrin subunit beta 7 [Source:NCBI gene;Acc:397221]	0.185201	0.227381	0.35861	0.515071	0.180725	0.12515	0.146028	0.18352	2.02426	1.01739	up
GO:0017158	regulation of calcium ion-dependent exocytosis	biological_process	9	0.107135	ENSSSCG00000013754	CACNA1A	calcium voltage-gated channel subunit alpha1 A [Source:NCBI gene;Acc:100525387]	0.02133	0.00985703	0.0134541	0.0178186	0.0498397	0.0472018	0.0284099	0.0521617	0.351662	-1.50774	down
GO:0035904	aorta development	biological_process	7	0.107135	ENSSSCG00000040746	LRP2	LDL receptor related protein 2 [Source:NCBI gene;Acc:100519689]	0.295167	0.701586	0.542765	0.959293	0.184023	0.427094	0.234247	0.380174	2.03895	1.02783	up
GO:2000042	negative regulation of double-strand break repair via homologous recombination	biological_process	11	0.107135	ENSSSCG00000021383	CGAS	cyclic GMP-AMP synthase [Source:NCBI gene;Acc:100516408]	0.211824	0.107048	0	0.176027	0.675164	0.29819	0.213437	0.677419	0.265474	-1.91336	down
GO:0007595	lactation	biological_process	8	0.107135	ENSSSCG00000008522	XDH	xanthine dehydrogenase [Source:NCBI gene;Acc:100515259]	0.252166	0.115657	0.157807	0.298556	0.0307525	0.0547913	0.0339726	0.0307205	5.48591	2.45573	up
GO:0021522	spinal cord motor neuron differentiation	biological_process	7	0.107135	ENSSSCG00000013754	CACNA1A	calcium voltage-gated channel subunit alpha1 A [Source:NCBI gene;Acc:100525387]	0.02133	0.00985703	0.0134541	0.0178186	0.0498397	0.0472018	0.0284099	0.0521617	0.351662	-1.50774	down
GO:0042391	regulation of membrane potential	biological_process	5	0.107364	ENSSSCG00000010325	KCNMA1	potassium calcium-activated channel subfamily M alpha 1 [Source:NCBI gene;Acc:397434]	0.11953	0.0259335	0.020903	0.0945038	0.585101	0.119901	0.110312	0.14883	0.270572	-1.88592	down
GO:0042391	regulation of membrane potential	biological_process	5	0.107364	ENSSSCG00000013754	CACNA1A	calcium voltage-gated channel subunit alpha1 A [Source:NCBI gene;Acc:100525387]	0.02133	0.00985703	0.0134541	0.0178186	0.0498397	0.0472018	0.0284099	0.0521617	0.351662	-1.50774	down
GO:0034765	regulation of ion transmembrane transport	biological_process	8	0.109494	ENSSSCG00000010325	KCNMA1	potassium calcium-activated channel subfamily M alpha 1 [Source:NCBI gene;Acc:397434]	0.11953	0.0259335	0.020903	0.0945038	0.585101	0.119901	0.110312	0.14883	0.270572	-1.88592	down
GO:0034765	regulation of ion transmembrane transport	biological_process	8	0.109494	ENSSSCG00000013754	CACNA1A	calcium voltage-gated channel subunit alpha1 A [Source:NCBI gene;Acc:100525387]	0.02133	0.00985703	0.0134541	0.0178186	0.0498397	0.0472018	0.0284099	0.0521617	0.351662	-1.50774	down
GO:0005516	calmodulin binding	molecular_function	5	0.109494	ENSSSCG00000003069	KCNN4	potassium calcium-activated channel subfamily N member 4 [Source:NCBI gene;Acc:397081]	0	0	0.140078	0.105751	0	0	0	0	614.572	9.26344	up
GO:0005516	calmodulin binding	molecular_function	5	0.109494	ENSSSCG00000013614	CNN1	calponin 1 [Source:NCBI gene;Acc:396911]	1.8584	0.382009	0.861651	0.879024	5.86686	0.486716	0.474544	6.63602	0.29568	-1.75789	down
GO:0005244	voltage-gated ion channel activity	molecular_function	9	0.109494	ENSSSCG00000010325	KCNMA1	potassium calcium-activated channel subfamily M alpha 1 [Source:NCBI gene;Acc:397434]	0.11953	0.0259335	0.020903	0.0945038	0.585101	0.119901	0.110312	0.14883	0.270572	-1.88592	down
GO:0005244	voltage-gated ion channel activity	molecular_function	9	0.109494	ENSSSCG00000013754	CACNA1A	calcium voltage-gated channel subunit alpha1 A [Source:NCBI gene;Acc:100525387]	0.02133	0.00985703	0.0134541	0.0178186	0.0498397	0.0472018	0.0284099	0.0521617	0.351662	-1.50774	down
GO:0016055	Wnt signaling pathway	biological_process	7	0.109494	ENSSSCG00000003423	DRAXIN	dorsal inhibitory axon guidance protein [Source:NCBI gene;Acc:100524629]	0.00774	0.008041	0.015319	0.025872	0	0	0	0	142.43	7.15411	up
GO:0016055	Wnt signaling pathway	biological_process	7	0.109494	ENSSSCG00000032521	ENSSSCG00000032521		0	0	0.0892744	0.109528	0.332956	0.32143	0.260953	0.239671	0.172122	-2.5385	down
GO:0043392	negative regulation of DNA binding	biological_process	7	0.11307	ENSSSCG00000017557	WFIKKN2	WAP, follistatin/kazal, immunoglobulin, kunitz and netrin domain containing 2 [Source:NCBI gene;Acc:100512012]	0.249887	0.205871	0.126918	0.160349	0.071994	0.093531	0.050522	0.09217	2.41072	1.26946	up
GO:0003674	molecular_function	molecular_function	2	0.11307	ENSSSCG00000015636	VSTM2A	V-set and transmembrane domain containing 2A [Source:NCBI gene;Acc:100517233]	0	0	0	0	0.259666	0	0	0	0.00154044	-9.34244	down
GO:0022904	respiratory electron transport chain	biological_process	7	0.11307	ENSSSCG00000040317	SOD2	superoxide dismutase 2 [Source:NCBI gene;Acc:100154319]	440.443	811.833	177.56	447.583	341.528	313.897	96.7074	127.848	2.13348	1.09321	up
GO:0008340	determination of adult lifespan	biological_process	4	0.11307	ENSSSCG00000021383	CGAS	cyclic GMP-AMP synthase [Source:NCBI gene;Acc:100516408]	0.211824	0.107048	0	0.176027	0.675164	0.29819	0.213437	0.677419	0.265474	-1.91336	down
GO:0048747	muscle fiber development	biological_process	8	0.11307	ENSSSCG00000017557	WFIKKN2	WAP, follistatin/kazal, immunoglobulin, kunitz and netrin domain containing 2 [Source:NCBI gene;Acc:100512012]	0.249887	0.205871	0.126918	0.160349	0.071994	0.093531	0.050522	0.09217	2.41072	1.26946	up
GO:0005246	calcium channel regulator activity	molecular_function	6	0.11307	ENSSSCG00000034163	PLN	phospholamban [Source:NCBI gene;Acc:397421]	1.31763	0.663593	1.79408	2.5748	6.43865	2.88279	3.72296	8.02146	0.301441	-1.73005	down
GO:0010332	response to gamma radiation	biological_process	7	0.11307	ENSSSCG00000040317	SOD2	superoxide dismutase 2 [Source:NCBI gene;Acc:100154319]	440.443	811.833	177.56	447.583	341.528	313.897	96.7074	127.848	2.13348	1.09321	up
GO:0070372	regulation of ERK1 and ERK2 cascade	biological_process	11	0.11307	ENSSSCG00000024492	EPHB1	EPH receptor B1 [Source:NCBI gene;Acc:100524585]	0.040072	0.135855	0.125182	0.079682	0.16303	0.106112	0.412634	0.215447	0.424411	-1.23647	down
GO:0045429	positive regulation of nitric oxide biosynthetic process	biological_process	9	0.11307	ENSSSCG00000040317	SOD2	superoxide dismutase 2 [Source:NCBI gene;Acc:100154319]	440.443	811.833	177.56	447.583	341.528	313.897	96.7074	127.848	2.13348	1.09321	up
GO:2000379	positive regulation of reactive oxygen species metabolic process	biological_process	8	0.11307	ENSSSCG00000008522	XDH	xanthine dehydrogenase [Source:NCBI gene;Acc:100515259]	0.252166	0.115657	0.157807	0.298556	0.0307525	0.0547913	0.0339726	0.0307205	5.48591	2.45573	up
GO:0004713	protein tyrosine kinase activity	molecular_function	8	0.115949	ENSSSCG00000012137	BMX	BMX non-receptor tyrosine kinase [Source:NCBI gene;Acc:100516528]	0.470346	0.451285	0.546133	1.00719	1.1298	0.604344	0.774901	3.02998	0.446821	-1.16223	down
GO:0004713	protein tyrosine kinase activity	molecular_function	8	0.115949	ENSSSCG00000024492	EPHB1	EPH receptor B1 [Source:NCBI gene;Acc:100524585]	0.040072	0.135855	0.125182	0.079682	0.16303	0.106112	0.412634	0.215447	0.424411	-1.23647	down
GO:0031295	T cell costimulation	biological_process	5	0.118966	ENSSSCG00000026695	TNFSF14	TNF superfamily member 14 [Source:NCBI gene;Acc:100519468]	0.056141	0	0.20312	0.057648	0	0	0	0	792.273	9.62985	up
GO:0017156	calcium ion regulated exocytosis	biological_process	9	0.118966	ENSSSCG00000013754	CACNA1A	calcium voltage-gated channel subunit alpha1 A [Source:NCBI gene;Acc:100525387]	0.02133	0.00985703	0.0134541	0.0178186	0.0498397	0.0472018	0.0284099	0.0521617	0.351662	-1.50774	down
GO:0006884	cell volume homeostasis	biological_process	7	0.118966	ENSSSCG00000003069	KCNN4	potassium calcium-activated channel subfamily N member 4 [Source:NCBI gene;Acc:397081]	0	0	0.140078	0.105751	0	0	0	0	614.572	9.26344	up
GO:0005540	hyaluronic acid binding	molecular_function	6	0.118966	ENSSSCG00000039358	SUSD5	sushi domain containing 5 [Source:NCBI gene;Acc:110256562]	0.147395	0.083949	0.045907	0.068649	0.366809	0.158018	0.139422	0.169267	0.414989	-1.26885	down
GO:0002218	activation of innate immune response	biological_process	5	0.118966	ENSSSCG00000021383	CGAS	cyclic GMP-AMP synthase [Source:NCBI gene;Acc:100516408]	0.211824	0.107048	0	0.176027	0.675164	0.29819	0.213437	0.677419	0.265474	-1.91336	down
GO:0050431	transforming growth factor beta binding	molecular_function	6	0.118966	ENSSSCG00000017557	WFIKKN2	WAP, follistatin/kazal, immunoglobulin, kunitz and netrin domain containing 2 [Source:NCBI gene;Acc:100512012]	0.249887	0.205871	0.126918	0.160349	0.071994	0.093531	0.050522	0.09217	2.41072	1.26946	up
GO:0055010	ventricular cardiac muscle tissue morphogenesis	biological_process	8	0.118966	ENSSSCG00000031080	HAND1	heart and neural crest derivatives expressed 1 [Source:NCBI gene;Acc:541594]	0.012135	0.076182	0	0.013521	0	0	0	0	254.595	7.99206	up
GO:0043409	negative regulation of MAPK cascade	biological_process	11	0.118966	ENSSSCG00000014561	NLRP6	NLR family pyrin domain containing 6 [Source:NCBI gene;Acc:100519245]	0.104384	0.039459	0.016589	0.052776	0.51811	0.05228	0.071686	0.125618	0.277725	-1.84827	down
GO:0043524	negative regulation of neuron apoptotic process	biological_process	10	0.120306	ENSSSCG00000003423	DRAXIN	dorsal inhibitory axon guidance protein [Source:NCBI gene;Acc:100524629]	0.00774	0.008041	0.015319	0.025872	0	0	0	0	142.43	7.15411	up
GO:0043524	negative regulation of neuron apoptotic process	biological_process	10	0.120306	ENSSSCG00000013754	CACNA1A	calcium voltage-gated channel subunit alpha1 A [Source:NCBI gene;Acc:100525387]	0.02133	0.00985703	0.0134541	0.0178186	0.0498397	0.0472018	0.0284099	0.0521617	0.351662	-1.50774	down
GO:0043410	positive regulation of MAPK cascade	biological_process	11	0.1225	ENSSSCG00000017980	ALOX12B	arachidonate 12-lipoxygenase, 12R type [Source:NCBI gene;Acc:100526246]	0	0	0	0.023422	0.112108	0.169971	0.046735	0.163495	0.0475758	-4.39363	down
GO:0043410	positive regulation of MAPK cascade	biological_process	11	0.1225	ENSSSCG00000020970	IL6	interleukin 6 [Source:NCBI gene;Acc:399500]	2.51923	2.82316	4.87588	5.13129	5.23923	6.45856	9.15744	20.8768	0.367813	-1.44296	down
GO:0070509	calcium ion import	biological_process	11	0.124824	ENSSSCG00000013754	CACNA1A	calcium voltage-gated channel subunit alpha1 A [Source:NCBI gene;Acc:100525387]	0.02133	0.00985703	0.0134541	0.0178186	0.0498397	0.0472018	0.0284099	0.0521617	0.351662	-1.50774	down
GO:0005548	phospholipid transporter activity	molecular_function	5	0.124824	ENSSSCG00000025681	ENSSSCG00000025681	phosphatidylcholine transfer protein [Source:NCBI gene;Acc:100621260]	0.037365	0	0	0	0	0.274144	0.278924	0.102669	0.0569817	-4.13336	down
GO:0048593	camera-type eye morphogenesis	biological_process	8	0.124824	ENSSSCG00000024492	EPHB1	EPH receptor B1 [Source:NCBI gene;Acc:100524585]	0.040072	0.135855	0.125182	0.079682	0.16303	0.106112	0.412634	0.215447	0.424411	-1.23647	down
GO:0003148	outflow tract septum morphogenesis	biological_process	6	0.124824	ENSSSCG00000040746	LRP2	LDL receptor related protein 2 [Source:NCBI gene;Acc:100519689]	0.295167	0.701586	0.542765	0.959293	0.184023	0.427094	0.234247	0.380174	2.03895	1.02783	up
GO:0005575	cellular_component	cellular_component	2	0.124824	ENSSSCG00000015636	VSTM2A	V-set and transmembrane domain containing 2A [Source:NCBI gene;Acc:100517233]	0	0	0	0	0.259666	0	0	0	0.00154044	-9.34244	down
GO:0030574	collagen catabolic process	biological_process	5	0.124824	ENSSSCG00000014988	MMP13	matrix metallopeptidase 13 [Source:NCBI gene;Acc:397346]	4.41573	0.779192	2.73243	0.822949	1.12681	0.478646	0.65519	0.178644	3.58723	1.84287	up
GO:0043027	cysteine-type endopeptidase inhibitor activity involved in apoptotic process	molecular_function	9	0.130642	ENSSSCG00000026695	TNFSF14	TNF superfamily member 14 [Source:NCBI gene;Acc:100519468]	0.056141	0	0.20312	0.057648	0	0	0	0	792.273	9.62985	up
GO:0005520	insulin-like growth factor binding	molecular_function	6	0.130642	ENSSSCG00000005360	IGFBPL1	insulin like growth factor binding protein like 1 [Source:NCBI gene;Acc:100155070]	0	0	0	0	0.02466	0	0.022178	0.037632	0.00473541	-7.7223	down
GO:0031210	phosphatidylcholine binding	molecular_function	6	0.130642	ENSSSCG00000025681	ENSSSCG00000025681	phosphatidylcholine transfer protein [Source:NCBI gene;Acc:100621260]	0.037365	0	0	0	0	0.274144	0.278924	0.102669	0.0569817	-4.13336	down
GO:0050900	leukocyte migration	biological_process	4	0.130642	ENSSSCG00000000257	ITGB7	integrin subunit beta 7 [Source:NCBI gene;Acc:397221]	0.185201	0.227381	0.35861	0.515071	0.180725	0.12515	0.146028	0.18352	2.02426	1.01739	up
GO:0035249	synaptic transmission, glutamatergic	biological_process	10	0.130642	ENSSSCG00000013754	CACNA1A	calcium voltage-gated channel subunit alpha1 A [Source:NCBI gene;Acc:100525387]	0.02133	0.00985703	0.0134541	0.0178186	0.0498397	0.0472018	0.0284099	0.0521617	0.351662	-1.50774	down
GO:0050770	regulation of axonogenesis	biological_process	9	0.130642	ENSSSCG00000013754	CACNA1A	calcium voltage-gated channel subunit alpha1 A [Source:NCBI gene;Acc:100525387]	0.02133	0.00985703	0.0134541	0.0178186	0.0498397	0.0472018	0.0284099	0.0521617	0.351662	-1.50774	down
GO:0008150	biological_process	biological_process	2	0.130642	ENSSSCG00000015636	VSTM2A	V-set and transmembrane domain containing 2A [Source:NCBI gene;Acc:100517233]	0	0	0	0	0.259666	0	0	0	0.00154044	-9.34244	down
GO:0016849	phosphorus-oxygen lyase activity	molecular_function	5	0.130642	ENSSSCG00000008742	CD38	CD38 molecule [Source:NCBI gene;Acc:100511702]	3.70184	3.39609	0.812398	2.31241	1.78349	1.58737	0.572801	0.953064	2.08767	1.06189	up
GO:0048565	digestive tract development	biological_process	6	0.130642	ENSSSCG00000022961	CLMP	CXADR like membrane protein [Source:NCBI gene;Acc:100512427]	13.811	22.0358	38.0115	16.4248	11.3576	12.5107	8.55634	8.44736	2.20892	1.14334	up
GO:1900745	positive regulation of p38MAPK cascade	biological_process	13	0.130642	ENSSSCG00000008522	XDH	xanthine dehydrogenase [Source:NCBI gene;Acc:100515259]	0.252166	0.115657	0.157807	0.298556	0.0307525	0.0547913	0.0339726	0.0307205	5.48591	2.45573	up
GO:0031526	brush border membrane	cellular_component	6	0.130642	ENSSSCG00000040746	LRP2	LDL receptor related protein 2 [Source:NCBI gene;Acc:100519689]	0.295167	0.701586	0.542765	0.959293	0.184023	0.427094	0.234247	0.380174	2.03895	1.02783	up
GO:0043425	bHLH transcription factor binding	molecular_function	7	0.130642	ENSSSCG00000031080	HAND1	heart and neural crest derivatives expressed 1 [Source:NCBI gene;Acc:541594]	0.012135	0.076182	0	0.013521	0	0	0	0	254.595	7.99206	up
GO:0007605	sensory perception of sound	biological_process	8	0.13137	ENSSSCG00000009735	P2RX2	purinergic receptor P2X 2 [Source:NCBI gene;Acc:100736581]	0	0.124022	0.170384	0.0845002	0	0	0	0	947.265	9.88762	up
GO:0007605	sensory perception of sound	biological_process	8	0.13137	ENSSSCG00000040746	LRP2	LDL receptor related protein 2 [Source:NCBI gene;Acc:100519689]	0.295167	0.701586	0.542765	0.959293	0.184023	0.427094	0.234247	0.380174	2.03895	1.02783	up
GO:0030154	cell differentiation	biological_process	5	0.135617	ENSSSCG00000002658	FOXL1	forkhead box L1 [Source:NCBI gene;Acc:100511634]	1.09758	0.23386	0.197345	0.099179	0.024694	0	0.053966	0.20144	5.81208	2.53905	up
GO:0030154	cell differentiation	biological_process	5	0.135617	ENSSSCG00000004540	ONECUT2	one cut homeobox 2 [Source:NCBI gene;Acc:106507181]	0	0	0	0	0	0.043783	0.033285	0.013458	0.00441862	-7.82219	down
GO:0030154	cell differentiation	biological_process	5	0.135617	ENSSSCG00000031080	HAND1	heart and neural crest derivatives expressed 1 [Source:NCBI gene;Acc:541594]	0.012135	0.076182	0	0.013521	0	0	0	0	254.595	7.99206	up
GO:0060976	coronary vasculature development	biological_process	6	0.136423	ENSSSCG00000040746	LRP2	LDL receptor related protein 2 [Source:NCBI gene;Acc:100519689]	0.295167	0.701586	0.542765	0.959293	0.184023	0.427094	0.234247	0.380174	2.03895	1.02783	up
GO:0001958	endochondral ossification	biological_process	6	0.136423	ENSSSCG00000014988	MMP13	matrix metallopeptidase 13 [Source:NCBI gene;Acc:397346]	4.41573	0.779192	2.73243	0.822949	1.12681	0.478646	0.65519	0.178644	3.58723	1.84287	up
GO:0001824	blastocyst development	biological_process	5	0.136423	ENSSSCG00000031080	HAND1	heart and neural crest derivatives expressed 1 [Source:NCBI gene;Acc:541594]	0.012135	0.076182	0	0.013521	0	0	0	0	254.595	7.99206	up
GO:0048741	skeletal muscle fiber development	biological_process	9	0.136423	ENSSSCG00000009735	P2RX2	purinergic receptor P2X 2 [Source:NCBI gene;Acc:100736581]	0	0.124022	0.170384	0.0845002	0	0	0	0	947.265	9.88762	up
GO:0048147	negative regulation of fibroblast proliferation	biological_process	8	0.136423	ENSSSCG00000040317	SOD2	superoxide dismutase 2 [Source:NCBI gene;Acc:100154319]	440.443	811.833	177.56	447.583	341.528	313.897	96.7074	127.848	2.13348	1.09321	up
GO:0031016	pancreas development	biological_process	6	0.136423	ENSSSCG00000004540	ONECUT2	one cut homeobox 2 [Source:NCBI gene;Acc:106507181]	0	0	0	0	0	0.043783	0.033285	0.013458	0.00441862	-7.82219	down
GO:0007214	gamma-aminobutyric acid signaling pathway	biological_process	6	0.136423	ENSSSCG00000013754	CACNA1A	calcium voltage-gated channel subunit alpha1 A [Source:NCBI gene;Acc:100525387]	0.02133	0.00985703	0.0134541	0.0178186	0.0498397	0.0472018	0.0284099	0.0521617	0.351662	-1.50774	down
GO:0016620	oxidoreductase activity, acting on the aldehyde or oxo group of donors, NAD or NADP as acceptor	molecular_function	6	0.136423	ENSSSCG00000026349	ALDH3B2	aldehyde dehydrogenase family 3 member B2-like [Source:NCBI gene;Acc:100522421]	0	0	0	0	0.070135	0	0	0.366194	0.000916739	-10.0912	down
GO:0006813	potassium ion transport	biological_process	9	0.138118	ENSSSCG00000003069	KCNN4	potassium calcium-activated channel subfamily N member 4 [Source:NCBI gene;Acc:397081]	0	0	0.140078	0.105751	0	0	0	0	614.572	9.26344	up
GO:0006813	potassium ion transport	biological_process	9	0.138118	ENSSSCG00000010325	KCNMA1	potassium calcium-activated channel subfamily M alpha 1 [Source:NCBI gene;Acc:397434]	0.11953	0.0259335	0.020903	0.0945038	0.585101	0.119901	0.110312	0.14883	0.270572	-1.88592	down
GO:0007275	multicellular organism development	biological_process	4	0.140177	ENSSSCG00000003423	DRAXIN	dorsal inhibitory axon guidance protein [Source:NCBI gene;Acc:100524629]	0.00774	0.008041	0.015319	0.025872	0	0	0	0	142.43	7.15411	up
GO:0007275	multicellular organism development	biological_process	4	0.140177	ENSSSCG00000032521	ENSSSCG00000032521		0	0	0.0892744	0.109528	0.332956	0.32143	0.260953	0.239671	0.172122	-2.5385	down
GO:0007275	multicellular organism development	biological_process	4	0.140177	ENSSSCG00000036741	ENSSSCG00000036741	paired like homeodomain 1 [Source:NCBI gene;Acc:100689266]	0	0	0.0115265	0	0.0500546	0	0.057267	0.119003	0.0509293	-4.29536	down
GO:0030424	axon	cellular_component	6	0.140177	ENSSSCG00000015205	HEPACAM	hepatic and glial cell adhesion molecule [Source:NCBI gene;Acc:100523198]	0.566281	0	0	0	0	0	0	0	1415.7	10.4673	up
GO:0030424	axon	cellular_component	6	0.140177	ENSSSCG00000024492	EPHB1	EPH receptor B1 [Source:NCBI gene;Acc:100524585]	0.040072	0.135855	0.125182	0.079682	0.16303	0.106112	0.412634	0.215447	0.424411	-1.23647	down
GO:0030424	axon	cellular_component	6	0.140177	ENSSSCG00000040746	LRP2	LDL receptor related protein 2 [Source:NCBI gene;Acc:100519689]	0.295167	0.701586	0.542765	0.959293	0.184023	0.427094	0.234247	0.380174	2.03895	1.02783	up
GO:0031175	neuron projection development	biological_process	7	0.140384	ENSSSCG00000020970	IL6	interleukin 6 [Source:NCBI gene;Acc:399500]	2.51923	2.82316	4.87588	5.13129	5.23923	6.45856	9.15744	20.8768	0.367813	-1.44296	down
GO:0031175	neuron projection development	biological_process	7	0.140384	ENSSSCG00000026754	ATCAY	ATCAY, caytaxin [Source:NCBI gene;Acc:100626830]	0	0	0	0	0.089454	0	0.032815	0.015637	0.00290053	-8.42947	down
GO:0051537	2 iron, 2 sulfur cluster binding	molecular_function	6	0.142165	ENSSSCG00000008522	XDH	xanthine dehydrogenase [Source:NCBI gene;Acc:100515259]	0.252166	0.115657	0.157807	0.298556	0.0307525	0.0547913	0.0339726	0.0307205	5.48591	2.45573	up
GO:0004114	3',5'-cyclic-nucleotide phosphodiesterase activity	molecular_function	9	0.142165	ENSSSCG00000023924	PDE1A	phosphodiesterase 1A [Source:NCBI gene;Acc:100152819]	0.184694	0.157517	0.102583	0.207681	0.415303	0.123247	0.136439	0.959707	0.399142	-1.32503	down
GO:0042056	chemoattractant activity	molecular_function	7	0.142165	ENSSSCG00000037358	ENSSSCG00000037358	serum amyloid A-3 protein [Source:NCBI gene;Acc:733603]	16.2985	26.5234	0.799804	11.4058	5.65267	2.30216	0.073928	0.729559	6.28289	2.65143	up
GO:0097546	ciliary base	cellular_component	5	0.142165	ENSSSCG00000011069	ARMC4	armadillo repeat containing 4 [Source:NCBI gene;Acc:100516925]	0.0158597	0.0121004	0	0	0.0386265	0.0782197	0.0455913	0.0130502	0.159328	-2.64993	down
GO:0048661	positive regulation of smooth muscle cell proliferation	biological_process	8	0.142165	ENSSSCG00000020970	IL6	interleukin 6 [Source:NCBI gene;Acc:399500]	2.51923	2.82316	4.87588	5.13129	5.23923	6.45856	9.15744	20.8768	0.367813	-1.44296	down
GO:0040014	regulation of multicellular organism growth	biological_process	7	0.142165	ENSSSCG00000039721	PRL	prolactin [Source:NCBI gene;Acc:396965]	0	0	0	0	0.017715	0	0.066378	0.032532	0.0034298	-8.18766	down
GO:0042542	response to hydrogen peroxide	biological_process	7	0.142165	ENSSSCG00000040317	SOD2	superoxide dismutase 2 [Source:NCBI gene;Acc:100154319]	440.443	811.833	177.56	447.583	341.528	313.897	96.7074	127.848	2.13348	1.09321	up
GO:0031032	actomyosin structure organization	biological_process	8	0.142165	ENSSSCG00000013614	CNN1	calponin 1 [Source:NCBI gene;Acc:396911]	1.8584	0.382009	0.861651	0.879024	5.86686	0.486716	0.474544	6.63602	0.29568	-1.75789	down
GO:0050769	positive regulation of neurogenesis	biological_process	9	0.147869	ENSSSCG00000040746	LRP2	LDL receptor related protein 2 [Source:NCBI gene;Acc:100519689]	0.295167	0.701586	0.542765	0.959293	0.184023	0.427094	0.234247	0.380174	2.03895	1.02783	up
GO:0050905	neuromuscular process	biological_process	6	0.147869	ENSSSCG00000013754	CACNA1A	calcium voltage-gated channel subunit alpha1 A [Source:NCBI gene;Acc:100525387]	0.02133	0.00985703	0.0134541	0.0178186	0.0498397	0.0472018	0.0284099	0.0521617	0.351662	-1.50774	down
GO:0005891	voltage-gated calcium channel complex	cellular_component	9	0.147869	ENSSSCG00000013754	CACNA1A	calcium voltage-gated channel subunit alpha1 A [Source:NCBI gene;Acc:100525387]	0.02133	0.00985703	0.0134541	0.0178186	0.0498397	0.0472018	0.0284099	0.0521617	0.351662	-1.50774	down
GO:0006913	nucleocytoplasmic transport	biological_process	8	0.147869	ENSSSCG00000040683	ENSSSCG00000040683		0	0	0	0	0.573955	0	0.190963	0.165093	0.000430102	-11.183	down
GO:0007528	neuromuscular junction development	biological_process	6	0.147869	ENSSSCG00000009735	P2RX2	purinergic receptor P2X 2 [Source:NCBI gene;Acc:100736581]	0	0.124022	0.170384	0.0845002	0	0	0	0	947.265	9.88762	up
GO:0055072	iron ion homeostasis	biological_process	11	0.147869	ENSSSCG00000040317	SOD2	superoxide dismutase 2 [Source:NCBI gene;Acc:100154319]	440.443	811.833	177.56	447.583	341.528	313.897	96.7074	127.848	2.13348	1.09321	up
GO:0005164	tumor necrosis factor receptor binding	molecular_function	8	0.147869	ENSSSCG00000026695	TNFSF14	TNF superfamily member 14 [Source:NCBI gene;Acc:100519468]	0.056141	0	0.20312	0.057648	0	0	0	0	792.273	9.62985	up
GO:0003341	cilium movement	biological_process	6	0.147869	ENSSSCG00000011069	ARMC4	armadillo repeat containing 4 [Source:NCBI gene;Acc:100516925]	0.0158597	0.0121004	0	0	0.0386265	0.0782197	0.0455913	0.0130502	0.159328	-2.64993	down
GO:0018108	peptidyl-tyrosine phosphorylation	biological_process	10	0.149528	ENSSSCG00000012137	BMX	BMX non-receptor tyrosine kinase [Source:NCBI gene;Acc:100516528]	0.470346	0.451285	0.546133	1.00719	1.1298	0.604344	0.774901	3.02998	0.446821	-1.16223	down
GO:0018108	peptidyl-tyrosine phosphorylation	biological_process	10	0.149528	ENSSSCG00000024492	EPHB1	EPH receptor B1 [Source:NCBI gene;Acc:100524585]	0.040072	0.135855	0.125182	0.079682	0.16303	0.106112	0.412634	0.215447	0.424411	-1.23647	down
GO:0042110	T cell activation	biological_process	7	0.153536	ENSSSCG00000001616	TREML2	triggering receptor expressed on myeloid cells like 2 [Source:NCBI gene;Acc:100738047]	0.054533	0.06149	0.031063	0.055344	0	0	0	0.017578	11.5161	3.52558	up
GO:0030001	metal ion transport	biological_process	8	0.153536	ENSSSCG00000040746	LRP2	LDL receptor related protein 2 [Source:NCBI gene;Acc:100519689]	0.295167	0.701586	0.542765	0.959293	0.184023	0.427094	0.234247	0.380174	2.03895	1.02783	up
GO:0010033	response to organic substance	biological_process	5	0.153536	ENSSSCG00000009735	P2RX2	purinergic receptor P2X 2 [Source:NCBI gene;Acc:100736581]	0	0.124022	0.170384	0.0845002	0	0	0	0	947.265	9.88762	up
GO:0008305	integrin complex	cellular_component	5	0.153536	ENSSSCG00000000257	ITGB7	integrin subunit beta 7 [Source:NCBI gene;Acc:397221]	0.185201	0.227381	0.35861	0.515071	0.180725	0.12515	0.146028	0.18352	2.02426	1.01739	up
GO:0046513	ceramide biosynthetic process	biological_process	10	0.153536	ENSSSCG00000017980	ALOX12B	arachidonate 12-lipoxygenase, 12R type [Source:NCBI gene;Acc:100526246]	0	0	0	0.023422	0.112108	0.169971	0.046735	0.163495	0.0475758	-4.39363	down
GO:0030010	establishment of cell polarity	biological_process	5	0.153536	ENSSSCG00000024492	EPHB1	EPH receptor B1 [Source:NCBI gene;Acc:100524585]	0.040072	0.135855	0.125182	0.079682	0.16303	0.106112	0.412634	0.215447	0.424411	-1.23647	down
GO:0051881	regulation of mitochondrial membrane potential	biological_process	6	0.153536	ENSSSCG00000040317	SOD2	superoxide dismutase 2 [Source:NCBI gene;Acc:100154319]	440.443	811.833	177.56	447.583	341.528	313.897	96.7074	127.848	2.13348	1.09321	up
GO:0071805	potassium ion transmembrane transport	biological_process	10	0.154145	ENSSSCG00000003069	KCNN4	potassium calcium-activated channel subfamily N member 4 [Source:NCBI gene;Acc:397081]	0	0	0.140078	0.105751	0	0	0	0	614.572	9.26344	up
GO:0071805	potassium ion transmembrane transport	biological_process	10	0.154145	ENSSSCG00000010325	KCNMA1	potassium calcium-activated channel subfamily M alpha 1 [Source:NCBI gene;Acc:397434]	0.11953	0.0259335	0.020903	0.0945038	0.585101	0.119901	0.110312	0.14883	0.270572	-1.88592	down
GO:0003281	ventricular septum development	biological_process	6	0.159166	ENSSSCG00000040746	LRP2	LDL receptor related protein 2 [Source:NCBI gene;Acc:100519689]	0.295167	0.701586	0.542765	0.959293	0.184023	0.427094	0.234247	0.380174	2.03895	1.02783	up
GO:0038083	peptidyl-tyrosine autophosphorylation	biological_process	11	0.159166	ENSSSCG00000012137	BMX	BMX non-receptor tyrosine kinase [Source:NCBI gene;Acc:100516528]	0.470346	0.451285	0.546133	1.00719	1.1298	0.604344	0.774901	3.02998	0.446821	-1.16223	down
GO:0010975	regulation of neuron projection development	biological_process	10	0.159166	ENSSSCG00000016022	ZNF804A	zinc finger protein 804A [Source:NCBI gene;Acc:100524346]	0.0553859	0.12664	0.189437	0.0925699	0.0276792	0.047276	0.056554	0.0325941	2.82769	1.49962	up
GO:0005154	epidermal growth factor receptor binding	molecular_function	7	0.159166	ENSSSCG00000001872	LINGO1	leucine rich repeat and Ig domain containing 1 [Source:NCBI gene;Acc:100155465]	0.100141	0.0945755	0.0313381	0.0508434	0.301034	0.291748	0.0916974	0.132854	0.338782	-1.56157	down
GO:0040018	positive regulation of multicellular organism growth	biological_process	8	0.159166	ENSSSCG00000035421	ATP8A2	phospholipid-transporting ATPase IB [Source:NCBI gene;Acc:100523747]	0	0	0	0	0	0.106941	0	0	0.00374038	-8.0626	down
GO:0006749	glutathione metabolic process	biological_process	8	0.159166	ENSSSCG00000040317	SOD2	superoxide dismutase 2 [Source:NCBI gene;Acc:100154319]	440.443	811.833	177.56	447.583	341.528	313.897	96.7074	127.848	2.13348	1.09321	up
GO:0007268	chemical synaptic transmission	biological_process	9	0.161121	ENSSSCG00000009735	P2RX2	purinergic receptor P2X 2 [Source:NCBI gene;Acc:100736581]	0	0.124022	0.170384	0.0845002	0	0	0	0	947.265	9.88762	up
GO:0007268	chemical synaptic transmission	biological_process	9	0.161121	ENSSSCG00000013754	CACNA1A	calcium voltage-gated channel subunit alpha1 A [Source:NCBI gene;Acc:100525387]	0.02133	0.00985703	0.0134541	0.0178186	0.0498397	0.0472018	0.0284099	0.0521617	0.351662	-1.50774	down
GO:0005525	GTP binding	molecular_function	8	0.162576	ENSSSCG00000010103	ENSSSCG00000010103	tubulin alpha-3 chain [Source:NCBI gene;Acc:100155138]	0.107222	0.227949	0.129334	0.240343	0	0.068874	0	0.042865	6.30799	2.65718	up
GO:0005525	GTP binding	molecular_function	8	0.162576	ENSSSCG00000021383	CGAS	cyclic GMP-AMP synthase [Source:NCBI gene;Acc:100516408]	0.211824	0.107048	0	0.176027	0.675164	0.29819	0.213437	0.677419	0.265474	-1.91336	down
GO:0005525	GTP binding	molecular_function	8	0.162576	ENSSSCG00000029077	TUBAL3	tubulin alpha like 3 [Source:NCBI gene;Acc:100623355]	0.007797	0.03003	0.008833	0.019154	0.076438	0.038824	0.057903	0.048124	0.297412	-1.74947	down
GO:0005525	GTP binding	molecular_function	8	0.162576	ENSSSCG00000040683	ENSSSCG00000040683		0	0	0	0	0.573955	0	0.190963	0.165093	0.000430102	-11.183	down
GO:0071773	cellular response to BMP stimulus	biological_process	8	0.164758	ENSSSCG00000015636	VSTM2A	V-set and transmembrane domain containing 2A [Source:NCBI gene;Acc:100517233]	0	0	0	0	0.259666	0	0	0	0.00154044	-9.34244	down
GO:0014065	phosphatidylinositol 3-kinase signaling	biological_process	8	0.164758	ENSSSCG00000009543	MYO16	myosin XVI [Source:NCBI gene;Acc:102161679]	0	0.044785	0	0.127558	0	0	0	0	430.858	8.75107	up
GO:0051592	response to calcium ion	biological_process	7	0.164758	ENSSSCG00000010325	KCNMA1	potassium calcium-activated channel subfamily M alpha 1 [Source:NCBI gene;Acc:397434]	0.11953	0.0259335	0.020903	0.0945038	0.585101	0.119901	0.110312	0.14883	0.270572	-1.88592	down
GO:0099061	integral component of postsynaptic density membrane	cellular_component	6	0.164758	ENSSSCG00000027654	NETO1	neuropilin and tolloid like 1 [Source:NCBI gene;Acc:100622872]	0.00786498	0.036241	0.0440407	0.0587965	0	0	0	0	367.358	8.52104	up
GO:0007411	axon guidance	biological_process	6	0.168154	ENSSSCG00000003423	DRAXIN	dorsal inhibitory axon guidance protein [Source:NCBI gene;Acc:100524629]	0.00774	0.008041	0.015319	0.025872	0	0	0	0	142.43	7.15411	up
GO:0007411	axon guidance	biological_process	6	0.168154	ENSSSCG00000024492	EPHB1	EPH receptor B1 [Source:NCBI gene;Acc:100524585]	0.040072	0.135855	0.125182	0.079682	0.16303	0.106112	0.412634	0.215447	0.424411	-1.23647	down
GO:0050714	positive regulation of protein secretion	biological_process	10	0.170314	ENSSSCG00000003069	KCNN4	potassium calcium-activated channel subfamily N member 4 [Source:NCBI gene;Acc:397081]	0	0	0.140078	0.105751	0	0	0	0	614.572	9.26344	up
GO:1902895	positive regulation of pri-miRNA transcription by RNA polymerase II	biological_process	11	0.170314	ENSSSCG00000039721	PRL	prolactin [Source:NCBI gene;Acc:396965]	0	0	0	0	0.017715	0	0.066378	0.032532	0.0034298	-8.18766	down
GO:0060349	bone morphogenesis	biological_process	6	0.170314	ENSSSCG00000014988	MMP13	matrix metallopeptidase 13 [Source:NCBI gene;Acc:397346]	4.41573	0.779192	2.73243	0.822949	1.12681	0.478646	0.65519	0.178644	3.58723	1.84287	up
GO:0048813	dendrite morphogenesis	biological_process	9	0.170314	ENSSSCG00000013754	CACNA1A	calcium voltage-gated channel subunit alpha1 A [Source:NCBI gene;Acc:100525387]	0.02133	0.00985703	0.0134541	0.0178186	0.0498397	0.0472018	0.0284099	0.0521617	0.351662	-1.50774	down
GO:0045121	membrane raft	cellular_component	6	0.170511	ENSSSCG00000017583	SGCA	sarcoglycan alpha [Source:NCBI gene;Acc:100240723]	0	0	0.007643	0	0.088343	0.0481123	0	0.048865	0.0412421	-4.59974	down
GO:0045121	membrane raft	cellular_component	6	0.170511	ENSSSCG00000024492	EPHB1	EPH receptor B1 [Source:NCBI gene;Acc:100524585]	0.040072	0.135855	0.125182	0.079682	0.16303	0.106112	0.412634	0.215447	0.424411	-1.23647	down
GO:0050918	positive chemotaxis	biological_process	6	0.175833	ENSSSCG00000037358	ENSSSCG00000037358	serum amyloid A-3 protein [Source:NCBI gene;Acc:733603]	16.2985	26.5234	0.799804	11.4058	5.65267	2.30216	0.073928	0.729559	6.28289	2.65143	up
GO:0019894	kinesin binding	molecular_function	6	0.175833	ENSSSCG00000026754	ATCAY	ATCAY, caytaxin [Source:NCBI gene;Acc:100626830]	0	0	0	0	0.089454	0	0.032815	0.015637	0.00290053	-8.42947	down
GO:0050776	regulation of immune response	biological_process	6	0.175833	ENSSSCG00000021383	CGAS	cyclic GMP-AMP synthase [Source:NCBI gene;Acc:100516408]	0.211824	0.107048	0	0.176027	0.675164	0.29819	0.213437	0.677419	0.265474	-1.91336	down
GO:0030513	positive regulation of BMP signaling pathway	biological_process	11	0.175833	ENSSSCG00000005584	CRB2	crumbs cell polarity complex component 2 [Source:NCBI gene;Acc:100511431]	0.040431	0.018636	0.010025	0.022794	0	0	0	0.010935	8.40293	3.07089	up
GO:0007154	cell communication	biological_process	4	0.181315	ENSSSCG00000040070	FREM3	FRAS1 related extracellular matrix 3 [Source:NCBI gene;Acc:100526232]	0.100141	0.05369	0.027404	0.014864	0	0	0.008584	0.011156	9.93409	3.31239	up
GO:0008217	regulation of blood pressure	biological_process	5	0.181315	ENSSSCG00000040317	SOD2	superoxide dismutase 2 [Source:NCBI gene;Acc:100154319]	440.443	811.833	177.56	447.583	341.528	313.897	96.7074	127.848	2.13348	1.09321	up
GO:0030282	bone mineralization	biological_process	7	0.181315	ENSSSCG00000014988	MMP13	matrix metallopeptidase 13 [Source:NCBI gene;Acc:397346]	4.41573	0.779192	2.73243	0.822949	1.12681	0.478646	0.65519	0.178644	3.58723	1.84287	up
GO:0007080	mitotic metaphase plate congression	biological_process	9	0.181315	ENSSSCG00000031976	ANKRD53	ankyrin repeat domain 53 [Source:NCBI gene;Acc:100739578]	0.0842339	0	0.0529971	0	0	0	0	0	343.078	8.42239	up
GO:0031901	early endosome membrane	cellular_component	9	0.181315	ENSSSCG00000024492	EPHB1	EPH receptor B1 [Source:NCBI gene;Acc:100524585]	0.040072	0.135855	0.125182	0.079682	0.16303	0.106112	0.412634	0.215447	0.424411	-1.23647	down
GO:0042470	melanosome	cellular_component	8	0.181315	ENSSSCG00000001401	ENSSSCG00000001401	ATPase H+ transporting V1 subunit G2 [Source:NCBI gene;Acc:100152358]	0.076847	0.137269	0.14906	0.045167	0.263849	0.368966	0.395026	0.27871	0.312535	-1.67791	down
GO:0048013	ephrin receptor signaling pathway	biological_process	8	0.181315	ENSSSCG00000024492	EPHB1	EPH receptor B1 [Source:NCBI gene;Acc:100524585]	0.040072	0.135855	0.125182	0.079682	0.16303	0.106112	0.412634	0.215447	0.424411	-1.23647	down
GO:0005925	focal adhesion	cellular_component	7	0.182373	ENSSSCG00000000257	ITGB7	integrin subunit beta 7 [Source:NCBI gene;Acc:397221]	0.185201	0.227381	0.35861	0.515071	0.180725	0.12515	0.146028	0.18352	2.02426	1.01739	up
GO:0005925	focal adhesion	cellular_component	7	0.182373	ENSSSCG00000016247	TM4SF20	transmembrane 4 L six family member 20 [Source:NCBI gene;Acc:100513630]	0.45096	0.388991	0.206182	0.350654	0.064814	0.204073	0.141277	0.062815	2.95317	1.56226	up
GO:0007628	adult walking behavior	biological_process	6	0.186762	ENSSSCG00000013754	CACNA1A	calcium voltage-gated channel subunit alpha1 A [Source:NCBI gene;Acc:100525387]	0.02133	0.00985703	0.0134541	0.0178186	0.0498397	0.0472018	0.0284099	0.0521617	0.351662	-1.50774	down
GO:0071949	FAD binding	molecular_function	7	0.186762	ENSSSCG00000008522	XDH	xanthine dehydrogenase [Source:NCBI gene;Acc:100515259]	0.252166	0.115657	0.157807	0.298556	0.0307525	0.0547913	0.0339726	0.0307205	5.48591	2.45573	up
GO:0006811	ion transport	biological_process	6	0.188675	ENSSSCG00000001401	ENSSSCG00000001401	ATPase H+ transporting V1 subunit G2 [Source:NCBI gene;Acc:100152358]	0.076847	0.137269	0.14906	0.045167	0.263849	0.368966	0.395026	0.27871	0.312535	-1.67791	down
GO:0006811	ion transport	biological_process	6	0.188675	ENSSSCG00000009735	P2RX2	purinergic receptor P2X 2 [Source:NCBI gene;Acc:100736581]	0	0.124022	0.170384	0.0845002	0	0	0	0	947.265	9.88762	up
GO:0006811	ion transport	biological_process	6	0.188675	ENSSSCG00000010325	KCNMA1	potassium calcium-activated channel subfamily M alpha 1 [Source:NCBI gene;Acc:397434]	0.11953	0.0259335	0.020903	0.0945038	0.585101	0.119901	0.110312	0.14883	0.270572	-1.88592	down
GO:0006811	ion transport	biological_process	6	0.188675	ENSSSCG00000013754	CACNA1A	calcium voltage-gated channel subunit alpha1 A [Source:NCBI gene;Acc:100525387]	0.02133	0.00985703	0.0134541	0.0178186	0.0498397	0.0472018	0.0284099	0.0521617	0.351662	-1.50774	down
GO:0005905	clathrin-coated pit	cellular_component	4	0.192172	ENSSSCG00000040746	LRP2	LDL receptor related protein 2 [Source:NCBI gene;Acc:100519689]	0.295167	0.701586	0.542765	0.959293	0.184023	0.427094	0.234247	0.380174	2.03895	1.02783	up
GO:0005856	cytoskeleton	cellular_component	6	0.193383	ENSSSCG00000010103	ENSSSCG00000010103	tubulin alpha-3 chain [Source:NCBI gene;Acc:100155138]	0.107222	0.227949	0.129334	0.240343	0	0.068874	0	0.042865	6.30799	2.65718	up
GO:0005856	cytoskeleton	cellular_component	6	0.193383	ENSSSCG00000013614	CNN1	calponin 1 [Source:NCBI gene;Acc:396911]	1.8584	0.382009	0.861651	0.879024	5.86686	0.486716	0.474544	6.63602	0.29568	-1.75789	down
GO:0005856	cytoskeleton	cellular_component	6	0.193383	ENSSSCG00000029077	TUBAL3	tubulin alpha like 3 [Source:NCBI gene;Acc:100623355]	0.007797	0.03003	0.008833	0.019154	0.076438	0.038824	0.057903	0.048124	0.297412	-1.74947	down
GO:0001525	angiogenesis	biological_process	5	0.196764	ENSSSCG00000024492	EPHB1	EPH receptor B1 [Source:NCBI gene;Acc:100524585]	0.040072	0.135855	0.125182	0.079682	0.16303	0.106112	0.412634	0.215447	0.424411	-1.23647	down
GO:0001525	angiogenesis	biological_process	5	0.196764	ENSSSCG00000031080	HAND1	heart and neural crest derivatives expressed 1 [Source:NCBI gene;Acc:541594]	0.012135	0.076182	0	0.013521	0	0	0	0	254.595	7.99206	up
GO:0001558	regulation of cell growth	biological_process	6	0.197547	ENSSSCG00000005360	IGFBPL1	insulin like growth factor binding protein like 1 [Source:NCBI gene;Acc:100155070]	0	0	0	0	0.02466	0	0.022178	0.037632	0.00473541	-7.7223	down
GO:0070301	cellular response to hydrogen peroxide	biological_process	8	0.197547	ENSSSCG00000020970	IL6	interleukin 6 [Source:NCBI gene;Acc:399500]	2.51923	2.82316	4.87588	5.13129	5.23923	6.45856	9.15744	20.8768	0.367813	-1.44296	down
GO:0005245	voltage-gated calcium channel activity	molecular_function	9	0.197547	ENSSSCG00000013754	CACNA1A	calcium voltage-gated channel subunit alpha1 A [Source:NCBI gene;Acc:100525387]	0.02133	0.00985703	0.0134541	0.0178186	0.0498397	0.0472018	0.0284099	0.0521617	0.351662	-1.50774	down
GO:0098978	glutamatergic synapse	cellular_component	4	0.198456	ENSSSCG00000013754	CACNA1A	calcium voltage-gated channel subunit alpha1 A [Source:NCBI gene;Acc:100525387]	0.02133	0.00985703	0.0134541	0.0178186	0.0498397	0.0472018	0.0284099	0.0521617	0.351662	-1.50774	down
GO:0098978	glutamatergic synapse	cellular_component	4	0.198456	ENSSSCG00000024492	EPHB1	EPH receptor B1 [Source:NCBI gene;Acc:100524585]	0.040072	0.135855	0.125182	0.079682	0.16303	0.106112	0.412634	0.215447	0.424411	-1.23647	down
GO:0098978	glutamatergic synapse	cellular_component	4	0.198456	ENSSSCG00000027654	NETO1	neuropilin and tolloid like 1 [Source:NCBI gene;Acc:100622872]	0.00786498	0.036241	0.0440407	0.0587965	0	0	0	0	367.358	8.52104	up
GO:0007416	synapse assembly	biological_process	6	0.202887	ENSSSCG00000013754	CACNA1A	calcium voltage-gated channel subunit alpha1 A [Source:NCBI gene;Acc:100525387]	0.02133	0.00985703	0.0134541	0.0178186	0.0498397	0.0472018	0.0284099	0.0521617	0.351662	-1.50774	down
GO:0004553	hydrolase activity, hydrolyzing O-glycosyl compounds	molecular_function	6	0.202887	ENSSSCG00000011735	SI	sucrase-isomaltase [Source:NCBI gene;Acc:100623884]	0	0	0.126363	0	0	0	0	0	315.907	8.30336	up
GO:0016235	aggresome	cellular_component	6	0.202887	ENSSSCG00000037457	HSPB7	heat shock protein family B (small) member 7 [Source:NCBI gene;Acc:100627988]	0.139649	0.020884	0.065506	0	1.15429	0.069848	0.043008	0.206936	0.153342	-2.70517	down
GO:0051898	negative regulation of protein kinase B signaling	biological_process	10	0.202887	ENSSSCG00000008522	XDH	xanthine dehydrogenase [Source:NCBI gene;Acc:100515259]	0.252166	0.115657	0.157807	0.298556	0.0307525	0.0547913	0.0339726	0.0307205	5.48591	2.45573	up
GO:0030672	synaptic vesicle membrane	cellular_component	4	0.202887	ENSSSCG00000038946	SLC17A8	solute carrier family 17 member 8 [Source:NCBI gene;Acc:100526221]	0.557141	0.599388	0.741513	0.662693	0.206377	0.366996	0.426302	0.224553	2.09171	1.06469	up
GO:0005506	iron ion binding	molecular_function	8	0.204012	ENSSSCG00000008522	XDH	xanthine dehydrogenase [Source:NCBI gene;Acc:100515259]	0.252166	0.115657	0.157807	0.298556	0.0307525	0.0547913	0.0339726	0.0307205	5.48591	2.45573	up
GO:0005506	iron ion binding	molecular_function	8	0.204012	ENSSSCG00000017980	ALOX12B	arachidonate 12-lipoxygenase, 12R type [Source:NCBI gene;Acc:100526246]	0	0	0	0.023422	0.112108	0.169971	0.046735	0.163495	0.0475758	-4.39363	down
GO:0036126	sperm flagellum	cellular_component	5	0.208191	ENSSSCG00000021645	MROH2B	maestro heat like repeat family member 2B [Source:NCBI gene;Acc:100521872]	0.031199	0.040556	0.017084	0	0	0	0	0	222.097	7.79505	up
GO:0030890	positive regulation of B cell proliferation	biological_process	11	0.208191	ENSSSCG00000008742	CD38	CD38 molecule [Source:NCBI gene;Acc:100511702]	3.70184	3.39609	0.812398	2.31241	1.78349	1.58737	0.572801	0.953064	2.08767	1.06189	up
GO:0006406	mRNA export from nucleus	biological_process	11	0.208191	ENSSSCG00000011910	ENSSSCG00000011910	SEM1, 26S proteasome complex subunit [Source:NCBI gene;Acc:100155621]	0.832802	0.563205	2.46644	2.17273	0.358046	0.75689	0.188579	0.116318	4.25063	2.08768	up
GO:0010508	positive regulation of autophagy	biological_process	9	0.208191	ENSSSCG00000007964	ENSSSCG00000007964	MEFV, pyrin innate immunity regulator [Source:NCBI gene;Acc:100517333]	0.506142	0.41965	0.203777	0.837334	0.18061	0.282563	0.186357	0.178046	2.3767	1.24896	up
GO:0071260	cellular response to mechanical stimulus	biological_process	6	0.21346	ENSSSCG00000026695	TNFSF14	TNF superfamily member 14 [Source:NCBI gene;Acc:100519468]	0.056141	0	0.20312	0.057648	0	0	0	0	792.273	9.62985	up
GO:0098655	cation transmembrane transport	biological_process	8	0.21346	ENSSSCG00000009735	P2RX2	purinergic receptor P2X 2 [Source:NCBI gene;Acc:100736581]	0	0.124022	0.170384	0.0845002	0	0	0	0	947.265	9.88762	up
GO:0044877	protein-containing complex binding	molecular_function	4	0.218596	ENSSSCG00000005584	CRB2	crumbs cell polarity complex component 2 [Source:NCBI gene;Acc:100511431]	0.040431	0.018636	0.010025	0.022794	0	0	0	0.010935	8.40293	3.07089	up
GO:0044877	protein-containing complex binding	molecular_function	4	0.218596	ENSSSCG00000024492	EPHB1	EPH receptor B1 [Source:NCBI gene;Acc:100524585]	0.040072	0.135855	0.125182	0.079682	0.16303	0.106112	0.412634	0.215447	0.424411	-1.23647	down
GO:0043588	skin development	biological_process	6	0.218695	ENSSSCG00000035421	ATP8A2	phospholipid-transporting ATPase IB [Source:NCBI gene;Acc:100523747]	0	0	0	0	0	0.106941	0	0	0.00374038	-8.0626	down
GO:0034446	substrate adhesion-dependent cell spreading	biological_process	8	0.218695	ENSSSCG00000000257	ITGB7	integrin subunit beta 7 [Source:NCBI gene;Acc:397221]	0.185201	0.227381	0.35861	0.515071	0.180725	0.12515	0.146028	0.18352	2.02426	1.01739	up
GO:0045600	positive regulation of fat cell differentiation	biological_process	8	0.218695	ENSSSCG00000011110	CCDC3	coiled-coil domain-containing protein 3 [Source:NCBI gene;Acc:100510975]	2.75071	0.930901	0.982636	0.802897	8.75776	1.4694	0.913093	5.07058	0.337253	-1.5681	down
GO:0050877	nervous system process	biological_process	5	0.218695	ENSSSCG00000013754	CACNA1A	calcium voltage-gated channel subunit alpha1 A [Source:NCBI gene;Acc:100525387]	0.02133	0.00985703	0.0134541	0.0178186	0.0498397	0.0472018	0.0284099	0.0521617	0.351662	-1.50774	down
GO:0008630	intrinsic apoptotic signaling pathway in response to DNA damage	biological_process	7	0.223895	ENSSSCG00000040317	SOD2	superoxide dismutase 2 [Source:NCBI gene;Acc:100154319]	440.443	811.833	177.56	447.583	341.528	313.897	96.7074	127.848	2.13348	1.09321	up
GO:0032755	positive regulation of interleukin-6 production	biological_process	8	0.223895	ENSSSCG00000020970	IL6	interleukin 6 [Source:NCBI gene;Acc:399500]	2.51923	2.82316	4.87588	5.13129	5.23923	6.45856	9.15744	20.8768	0.367813	-1.44296	down
GO:0043124	negative regulation of I-kappaB kinase/NF-kappaB signaling	biological_process	10	0.223895	ENSSSCG00000014561	NLRP6	NLR family pyrin domain containing 6 [Source:NCBI gene;Acc:100519245]	0.104384	0.039459	0.016589	0.052776	0.51811	0.05228	0.071686	0.125618	0.277725	-1.84827	down
GO:0008542	visual learning	biological_process	5	0.223895	ENSSSCG00000027654	NETO1	neuropilin and tolloid like 1 [Source:NCBI gene;Acc:100622872]	0.00786498	0.036241	0.0440407	0.0587965	0	0	0	0	367.358	8.52104	up
GO:0010923	negative regulation of phosphatase activity	biological_process	11	0.223895	ENSSSCG00000003191	TSKS	testis specific serine kinase substrate [Source:NCBI gene;Acc:100522079]	0	0	0	0	0.090648	0	0.098386	0.048463	0.00168423	-9.21369	down
GO:0046777	protein autophosphorylation	biological_process	10	0.225923	ENSSSCG00000012137	BMX	BMX non-receptor tyrosine kinase [Source:NCBI gene;Acc:100516528]	0.470346	0.451285	0.546133	1.00719	1.1298	0.604344	0.774901	3.02998	0.446821	-1.16223	down
GO:0046777	protein autophosphorylation	biological_process	10	0.225923	ENSSSCG00000024492	EPHB1	EPH receptor B1 [Source:NCBI gene;Acc:100524585]	0.040072	0.135855	0.125182	0.079682	0.16303	0.106112	0.412634	0.215447	0.424411	-1.23647	down
GO:0005881	cytoplasmic microtubule	cellular_component	8	0.229061	ENSSSCG00000022961	CLMP	CXADR like membrane protein [Source:NCBI gene;Acc:100512427]	13.811	22.0358	38.0115	16.4248	11.3576	12.5107	8.55634	8.44736	2.20892	1.14334	up
GO:0001947	heart looping	biological_process	7	0.229061	ENSSSCG00000031080	HAND1	heart and neural crest derivatives expressed 1 [Source:NCBI gene;Acc:541594]	0.012135	0.076182	0	0.013521	0	0	0	0	254.595	7.99206	up
GO:0045599	negative regulation of fat cell differentiation	biological_process	8	0.229061	ENSSSCG00000040317	SOD2	superoxide dismutase 2 [Source:NCBI gene;Acc:100154319]	440.443	811.833	177.56	447.583	341.528	313.897	96.7074	127.848	2.13348	1.09321	up
GO:0030139	endocytic vesicle	cellular_component	7	0.229061	ENSSSCG00000040746	LRP2	LDL receptor related protein 2 [Source:NCBI gene;Acc:100519689]	0.295167	0.701586	0.542765	0.959293	0.184023	0.427094	0.234247	0.380174	2.03895	1.02783	up
GO:0004715	non-membrane spanning protein tyrosine kinase activity	molecular_function	9	0.229061	ENSSSCG00000012137	BMX	BMX non-receptor tyrosine kinase [Source:NCBI gene;Acc:100516528]	0.470346	0.451285	0.546133	1.00719	1.1298	0.604344	0.774901	3.02998	0.446821	-1.16223	down
GO:0030514	negative regulation of BMP signaling pathway	biological_process	11	0.234192	ENSSSCG00000040746	LRP2	LDL receptor related protein 2 [Source:NCBI gene;Acc:100519689]	0.295167	0.701586	0.542765	0.959293	0.184023	0.427094	0.234247	0.380174	2.03895	1.02783	up
GO:0005903	brush border	cellular_component	5	0.234192	ENSSSCG00000040746	LRP2	LDL receptor related protein 2 [Source:NCBI gene;Acc:100519689]	0.295167	0.701586	0.542765	0.959293	0.184023	0.427094	0.234247	0.380174	2.03895	1.02783	up
GO:0001750	photoreceptor outer segment	cellular_component	5	0.234192	ENSSSCG00000001636	GUCA1A	guanylate cyclase activator 1A [Source:NCBI gene;Acc:100739200]	0.062988	0.164763	0.236424	0.111331	0.353288	0.30342	0.380666	0.222057	0.456957	-1.12987	down
GO:0051536	iron-sulfur cluster binding	molecular_function	5	0.234192	ENSSSCG00000008522	XDH	xanthine dehydrogenase [Source:NCBI gene;Acc:100515259]	0.252166	0.115657	0.157807	0.298556	0.0307525	0.0547913	0.0339726	0.0307205	5.48591	2.45573	up
GO:0071347	cellular response to interleukin-1	biological_process	8	0.234192	ENSSSCG00000037358	ENSSSCG00000037358	serum amyloid A-3 protein [Source:NCBI gene;Acc:733603]	16.2985	26.5234	0.799804	11.4058	5.65267	2.30216	0.073928	0.729559	6.28289	2.65143	up
GO:0042531	positive regulation of tyrosine phosphorylation of STAT protein	biological_process	11	0.23929	ENSSSCG00000020970	IL6	interleukin 6 [Source:NCBI gene;Acc:399500]	2.51923	2.82316	4.87588	5.13129	5.23923	6.45856	9.15744	20.8768	0.367813	-1.44296	down
GO:0005901	caveola	cellular_component	8	0.23929	ENSSSCG00000010325	KCNMA1	potassium calcium-activated channel subfamily M alpha 1 [Source:NCBI gene;Acc:397434]	0.11953	0.0259335	0.020903	0.0945038	0.585101	0.119901	0.110312	0.14883	0.270572	-1.88592	down
GO:0034613	cellular protein localization	biological_process	6	0.23929	ENSSSCG00000015205	HEPACAM	hepatic and glial cell adhesion molecule [Source:NCBI gene;Acc:100523198]	0.566281	0	0	0	0	0	0	0	1415.7	10.4673	up
GO:0035861	site of double-strand break	cellular_component	7	0.244354	ENSSSCG00000021383	CGAS	cyclic GMP-AMP synthase [Source:NCBI gene;Acc:100516408]	0.211824	0.107048	0	0.176027	0.675164	0.29819	0.213437	0.677419	0.265474	-1.91336	down
GO:0042475	odontogenesis of dentin-containing tooth	biological_process	7	0.244354	ENSSSCG00000031080	HAND1	heart and neural crest derivatives expressed 1 [Source:NCBI gene;Acc:541594]	0.012135	0.076182	0	0.013521	0	0	0	0	254.595	7.99206	up
GO:0032880	regulation of protein localization	biological_process	6	0.244354	ENSSSCG00000026754	ATCAY	ATCAY, caytaxin [Source:NCBI gene;Acc:100626830]	0	0	0	0	0.089454	0	0.032815	0.015637	0.00290053	-8.42947	down
GO:0055085	transmembrane transport	biological_process	6	0.244866	ENSSSCG00000010325	KCNMA1	potassium calcium-activated channel subfamily M alpha 1 [Source:NCBI gene;Acc:397434]	0.11953	0.0259335	0.020903	0.0945038	0.585101	0.119901	0.110312	0.14883	0.270572	-1.88592	down
GO:0055085	transmembrane transport	biological_process	6	0.244866	ENSSSCG00000013754	CACNA1A	calcium voltage-gated channel subunit alpha1 A [Source:NCBI gene;Acc:100525387]	0.02133	0.00985703	0.0134541	0.0178186	0.0498397	0.0472018	0.0284099	0.0521617	0.351662	-1.50774	down
GO:0055085	transmembrane transport	biological_process	6	0.244866	ENSSSCG00000027768	SLC29A4	solute carrier family 29 member 4 [Source:NCBI gene;Acc:100624843]	0.07378	0.054982	0.041073	0	0.270753	0.039272	0.15353	0.3182	0.217248	-2.20258	down
GO:0055085	transmembrane transport	biological_process	6	0.244866	ENSSSCG00000032113	ENSSSCG00000032113	cationic amino acid transporter 3-like [Source:NCBI gene;Acc:100523440]	0	0	0	0	0.016327	0.0105538	0.0168877	0	0.00913901	-6.77375	down
GO:0055085	transmembrane transport	biological_process	6	0.244866	ENSSSCG00000038946	SLC17A8	solute carrier family 17 member 8 [Source:NCBI gene;Acc:100526221]	0.557141	0.599388	0.741513	0.662693	0.206377	0.366996	0.426302	0.224553	2.09171	1.06469	up
GO:0005911	cell-cell junction	cellular_component	4	0.248001	ENSSSCG00000015205	HEPACAM	hepatic and glial cell adhesion molecule [Source:NCBI gene;Acc:100523198]	0.566281	0	0	0	0	0	0	0	1415.7	10.4673	up
GO:0005911	cell-cell junction	cellular_component	4	0.248001	ENSSSCG00000017583	SGCA	sarcoglycan alpha [Source:NCBI gene;Acc:100240723]	0	0	0.007643	0	0.088343	0.0481123	0	0.048865	0.0412421	-4.59974	down
GO:0042102	positive regulation of T cell proliferation	biological_process	11	0.249385	ENSSSCG00000020970	IL6	interleukin 6 [Source:NCBI gene;Acc:399500]	2.51923	2.82316	4.87588	5.13129	5.23923	6.45856	9.15744	20.8768	0.367813	-1.44296	down
GO:0042552	myelination	biological_process	6	0.249385	ENSSSCG00000010009	GAL3ST1	galactose-3-O-sulfotransferase 1 [Source:NCBI gene;Acc:100155265]	0.0467954	0.0789851	0.115817	0.0450968	0.186846	0.185555	0.188765	0.104908	0.430424	-1.21617	down
GO:0006954	inflammatory response	biological_process	6	0.25046	ENSSSCG00000007964	ENSSSCG00000007964	MEFV, pyrin innate immunity regulator [Source:NCBI gene;Acc:100517333]	0.506142	0.41965	0.203777	0.837334	0.18061	0.282563	0.186357	0.178046	2.3767	1.24896	up
GO:0006954	inflammatory response	biological_process	6	0.25046	ENSSSCG00000020970	IL6	interleukin 6 [Source:NCBI gene;Acc:399500]	2.51923	2.82316	4.87588	5.13129	5.23923	6.45856	9.15744	20.8768	0.367813	-1.44296	down
GO:0005515	protein binding	molecular_function	4	0.251099	ENSSSCG00000001872	LINGO1	leucine rich repeat and Ig domain containing 1 [Source:NCBI gene;Acc:100155465]	0.100141	0.0945755	0.0313381	0.0508434	0.301034	0.291748	0.0916974	0.132854	0.338782	-1.56157	down
GO:0005515	protein binding	molecular_function	4	0.251099	ENSSSCG00000002927	LRFN3	leucine rich repeat and fibronectin type III domain containing 3 [Source:NCBI gene;Acc:100738610]	0	0	0	0	0.160984	0	0.026081	0.264803	0.000885214	-10.1417	down
GO:0005515	protein binding	molecular_function	4	0.251099	ENSSSCG00000003386	TNFRSF9	TNF receptor superfamily member 9 [Source:NCBI gene;Acc:100519368]	0.0695877	0.12297	0.188732	0.130953	0.288478	0.336174	0.185547	0.284585	0.467894	-1.09575	down
GO:0005515	protein binding	molecular_function	4	0.251099	ENSSSCG00000005360	IGFBPL1	insulin like growth factor binding protein like 1 [Source:NCBI gene;Acc:100155070]	0	0	0	0	0.02466	0	0.022178	0.037632	0.00473541	-7.7223	down
GO:0005515	protein binding	molecular_function	4	0.251099	ENSSSCG00000009543	MYO16	myosin XVI [Source:NCBI gene;Acc:102161679]	0	0.044785	0	0.127558	0	0	0	0	430.858	8.75107	up
GO:0005515	protein binding	molecular_function	4	0.251099	ENSSSCG00000010325	KCNMA1	potassium calcium-activated channel subfamily M alpha 1 [Source:NCBI gene;Acc:397434]	0.11953	0.0259335	0.020903	0.0945038	0.585101	0.119901	0.110312	0.14883	0.270572	-1.88592	down
GO:0005515	protein binding	molecular_function	4	0.251099	ENSSSCG00000011069	ARMC4	armadillo repeat containing 4 [Source:NCBI gene;Acc:100516925]	0.0158597	0.0121004	0	0	0.0386265	0.0782197	0.0455913	0.0130502	0.159328	-2.64993	down
GO:0005515	protein binding	molecular_function	4	0.251099	ENSSSCG00000012101	ENSSSCG00000012101	anosmin 1 [Source:NCBI gene;Acc:100154011]	0	0	0	0	0.171408	0.029846	0.104454	0.056215	0.00110521	-9.82147	down
GO:0005515	protein binding	molecular_function	4	0.251099	ENSSSCG00000013614	CNN1	calponin 1 [Source:NCBI gene;Acc:396911]	1.8584	0.382009	0.861651	0.879024	5.86686	0.486716	0.474544	6.63602	0.29568	-1.75789	down
GO:0005515	protein binding	molecular_function	4	0.251099	ENSSSCG00000013865	NWD1	NACHT and WD repeat domain containing 1 [Source:NCBI gene;Acc:100737957]	0	0	0	0	0	0.0134069	0.026871	0.0161217	0.00709226	-7.13954	down
GO:0005515	protein binding	molecular_function	4	0.251099	ENSSSCG00000014251	ENSSSCG00000014251		2.33654	3.25419	2.13752	3.81698	0.809353	0.802181	0.731221	2.46695	2.4004	1.26328	up
GO:0005515	protein binding	molecular_function	4	0.251099	ENSSSCG00000015073	TAGLN	transgelin [Source:NCBI gene;Acc:397021]	17.3491	6.88576	6.78187	6.85828	44.7031	6.08871	8.11511	33.415	0.41025	-1.28543	down
GO:0005515	protein binding	molecular_function	4	0.251099	ENSSSCG00000017557	WFIKKN2	WAP, follistatin/kazal, immunoglobulin, kunitz and netrin domain containing 2 [Source:NCBI gene;Acc:100512012]	0.249887	0.205871	0.126918	0.160349	0.071994	0.093531	0.050522	0.09217	2.41072	1.26946	up
GO:0005515	protein binding	molecular_function	4	0.251099	ENSSSCG00000017792	CORO6	coronin 6 [Source:NCBI gene;Acc:100516758]	0.685895	1.05208	2.88484	1.33607	0.54723	0.435281	0.726926	0.543472	2.64497	1.40325	up
GO:0005515	protein binding	molecular_function	4	0.251099	ENSSSCG00000017980	ALOX12B	arachidonate 12-lipoxygenase, 12R type [Source:NCBI gene;Acc:100526246]	0	0	0	0.023422	0.112108	0.169971	0.046735	0.163495	0.0475758	-4.39363	down
GO:0005515	protein binding	molecular_function	4	0.251099	ENSSSCG00000024492	EPHB1	EPH receptor B1 [Source:NCBI gene;Acc:100524585]	0.040072	0.135855	0.125182	0.079682	0.16303	0.106112	0.412634	0.215447	0.424411	-1.23647	down
GO:0005515	protein binding	molecular_function	4	0.251099	ENSSSCG00000026695	TNFSF14	TNF superfamily member 14 [Source:NCBI gene;Acc:100519468]	0.056141	0	0.20312	0.057648	0	0	0	0	792.273	9.62985	up
GO:0005515	protein binding	molecular_function	4	0.251099	ENSSSCG00000027654	NETO1	neuropilin and tolloid like 1 [Source:NCBI gene;Acc:100622872]	0.00786498	0.036241	0.0440407	0.0587965	0	0	0	0	367.358	8.52104	up
GO:0005515	protein binding	molecular_function	4	0.251099	ENSSSCG00000030681	MYBPH	myosin binding protein H [Source:NCBI gene;Acc:613132]	0.076864	0.024048	0.099623	0.042052	0.701717	0.03343	0.003609	0.933629	0.145055	-2.78533	down
GO:0005515	protein binding	molecular_function	4	0.251099	ENSSSCG00000031976	ANKRD53	ankyrin repeat domain 53 [Source:NCBI gene;Acc:100739578]	0.0842339	0	0.0529971	0	0	0	0	0	343.078	8.42239	up
GO:0005515	protein binding	molecular_function	4	0.251099	ENSSSCG00000032521	ENSSSCG00000032521		0	0	0.0892744	0.109528	0.332956	0.32143	0.260953	0.239671	0.172122	-2.5385	down
GO:0005515	protein binding	molecular_function	4	0.251099	ENSSSCG00000040746	LRP2	LDL receptor related protein 2 [Source:NCBI gene;Acc:100519689]	0.295167	0.701586	0.542765	0.959293	0.184023	0.427094	0.234247	0.380174	2.03895	1.02783	up
GO:0030426	growth cone	cellular_component	5	0.254383	ENSSSCG00000016022	ZNF804A	zinc finger protein 804A [Source:NCBI gene;Acc:100524346]	0.0553859	0.12664	0.189437	0.0925699	0.0276792	0.047276	0.056554	0.0325941	2.82769	1.49962	up
GO:0016779	nucleotidyltransferase activity	molecular_function	6	0.254383	ENSSSCG00000021383	CGAS	cyclic GMP-AMP synthase [Source:NCBI gene;Acc:100516408]	0.211824	0.107048	0	0.176027	0.675164	0.29819	0.213437	0.677419	0.265474	-1.91336	down
GO:0022008	neurogenesis	biological_process	6	0.259347	ENSSSCG00000024492	EPHB1	EPH receptor B1 [Source:NCBI gene;Acc:100524585]	0.040072	0.135855	0.125182	0.079682	0.16303	0.106112	0.412634	0.215447	0.424411	-1.23647	down
GO:0003743	translation initiation factor activity	molecular_function	8	0.259347	ENSSSCG00000014052	EIF4E1B	eukaryotic translation initiation factor 4E family member 1B [Source:NCBI gene;Acc:100523233]	0.188853	0	0.057771	0.658422	0	0	0.033915	0.007078	22.0781	4.46454	up
GO:0001669	acrosomal vesicle	cellular_component	9	0.259347	ENSSSCG00000021645	MROH2B	maestro heat like repeat family member 2B [Source:NCBI gene;Acc:100521872]	0.031199	0.040556	0.017084	0	0	0	0	0	222.097	7.79505	up
GO:0050885	neuromuscular process controlling balance	biological_process	7	0.259347	ENSSSCG00000013754	CACNA1A	calcium voltage-gated channel subunit alpha1 A [Source:NCBI gene;Acc:100525387]	0.02133	0.00985703	0.0134541	0.0178186	0.0498397	0.0472018	0.0284099	0.0521617	0.351662	-1.50774	down
GO:0003924	GTPase activity	molecular_function	9	0.259639	ENSSSCG00000010103	ENSSSCG00000010103	tubulin alpha-3 chain [Source:NCBI gene;Acc:100155138]	0.107222	0.227949	0.129334	0.240343	0	0.068874	0	0.042865	6.30799	2.65718	up
GO:0003924	GTPase activity	molecular_function	9	0.259639	ENSSSCG00000029077	TUBAL3	tubulin alpha like 3 [Source:NCBI gene;Acc:100623355]	0.007797	0.03003	0.008833	0.019154	0.076438	0.038824	0.057903	0.048124	0.297412	-1.74947	down
GO:0003924	GTPase activity	molecular_function	9	0.259639	ENSSSCG00000040683	ENSSSCG00000040683		0	0	0	0	0.573955	0	0.190963	0.165093	0.000430102	-11.183	down
GO:0005874	microtubule	cellular_component	7	0.260304	ENSSSCG00000010103	ENSSSCG00000010103	tubulin alpha-3 chain [Source:NCBI gene;Acc:100155138]	0.107222	0.227949	0.129334	0.240343	0	0.068874	0	0.042865	6.30799	2.65718	up
GO:0005874	microtubule	cellular_component	7	0.260304	ENSSSCG00000029077	TUBAL3	tubulin alpha like 3 [Source:NCBI gene;Acc:100623355]	0.007797	0.03003	0.008833	0.019154	0.076438	0.038824	0.057903	0.048124	0.297412	-1.74947	down
GO:0016491	oxidoreductase activity	molecular_function	4	0.261817	ENSSSCG00000008522	XDH	xanthine dehydrogenase [Source:NCBI gene;Acc:100515259]	0.252166	0.115657	0.157807	0.298556	0.0307525	0.0547913	0.0339726	0.0307205	5.48591	2.45573	up
GO:0016491	oxidoreductase activity	molecular_function	4	0.261817	ENSSSCG00000017980	ALOX12B	arachidonate 12-lipoxygenase, 12R type [Source:NCBI gene;Acc:100526246]	0	0	0	0.023422	0.112108	0.169971	0.046735	0.163495	0.0475758	-4.39363	down
GO:0016491	oxidoreductase activity	molecular_function	4	0.261817	ENSSSCG00000026349	ALDH3B2	aldehyde dehydrogenase family 3 member B2-like [Source:NCBI gene;Acc:100522421]	0	0	0	0	0.070135	0	0	0.366194	0.000916739	-10.0912	down
GO:0016491	oxidoreductase activity	molecular_function	4	0.261817	ENSSSCG00000040317	SOD2	superoxide dismutase 2 [Source:NCBI gene;Acc:100154319]	440.443	811.833	177.56	447.583	341.528	313.897	96.7074	127.848	2.13348	1.09321	up
GO:0005518	collagen binding	molecular_function	5	0.264279	ENSSSCG00000014988	MMP13	matrix metallopeptidase 13 [Source:NCBI gene;Acc:397346]	4.41573	0.779192	2.73243	0.822949	1.12681	0.478646	0.65519	0.178644	3.58723	1.84287	up
GO:0001756	somitogenesis	biological_process	7	0.264279	ENSSSCG00000005584	CRB2	crumbs cell polarity complex component 2 [Source:NCBI gene;Acc:100511431]	0.040431	0.018636	0.010025	0.022794	0	0	0	0.010935	8.40293	3.07089	up
GO:0042060	wound healing	biological_process	6	0.264279	ENSSSCG00000014561	NLRP6	NLR family pyrin domain containing 6 [Source:NCBI gene;Acc:100519245]	0.104384	0.039459	0.016589	0.052776	0.51811	0.05228	0.071686	0.125618	0.277725	-1.84827	down
GO:0016459	myosin complex	cellular_component	4	0.264279	ENSSSCG00000009543	MYO16	myosin XVI [Source:NCBI gene;Acc:102161679]	0	0.044785	0	0.127558	0	0	0	0	430.858	8.75107	up
GO:0043154	negative regulation of cysteine-type endopeptidase activity involved in apoptotic process	biological_process	10	0.269179	ENSSSCG00000026695	TNFSF14	TNF superfamily member 14 [Source:NCBI gene;Acc:100519468]	0.056141	0	0.20312	0.057648	0	0	0	0	792.273	9.62985	up
GO:0070373	negative regulation of ERK1 and ERK2 cascade	biological_process	12	0.269179	ENSSSCG00000014561	NLRP6	NLR family pyrin domain containing 6 [Source:NCBI gene;Acc:100519245]	0.104384	0.039459	0.016589	0.052776	0.51811	0.05228	0.071686	0.125618	0.277725	-1.84827	down
GO:0002250	adaptive immune response	biological_process	5	0.269179	ENSSSCG00000012137	BMX	BMX non-receptor tyrosine kinase [Source:NCBI gene;Acc:100516528]	0.470346	0.451285	0.546133	1.00719	1.1298	0.604344	0.774901	3.02998	0.446821	-1.16223	down
GO:0030855	epithelial cell differentiation	biological_process	6	0.269179	ENSSSCG00000015073	TAGLN	transgelin [Source:NCBI gene;Acc:397021]	17.3491	6.88576	6.78187	6.85828	44.7031	6.08871	8.11511	33.415	0.41025	-1.28543	down
GO:0048812	neuron projection morphogenesis	biological_process	8	0.269179	ENSSSCG00000009543	MYO16	myosin XVI [Source:NCBI gene;Acc:102161679]	0	0.044785	0	0.127558	0	0	0	0	430.858	8.75107	up
GO:0004714	transmembrane receptor protein tyrosine kinase activity	molecular_function	9	0.269179	ENSSSCG00000024492	EPHB1	EPH receptor B1 [Source:NCBI gene;Acc:100524585]	0.040072	0.135855	0.125182	0.079682	0.16303	0.106112	0.412634	0.215447	0.424411	-1.23647	down
GO:0032587	ruffle membrane	cellular_component	6	0.278881	ENSSSCG00000012137	BMX	BMX non-receptor tyrosine kinase [Source:NCBI gene;Acc:100516528]	0.470346	0.451285	0.546133	1.00719	1.1298	0.604344	0.774901	3.02998	0.446821	-1.16223	down
GO:0007613	memory	biological_process	5	0.278881	ENSSSCG00000027654	NETO1	neuropilin and tolloid like 1 [Source:NCBI gene;Acc:100622872]	0.00786498	0.036241	0.0440407	0.0587965	0	0	0	0	367.358	8.52104	up
GO:0005126	cytokine receptor binding	molecular_function	6	0.278881	ENSSSCG00000031022	IFN-DELTA-7	interferon delta 7 [Source:NCBI gene;Acc:100303727]	0.262573	0.106276	0.0713	0.396111	0	0	0	0	2090.65	11.0297	up
GO:0042383	sarcolemma	cellular_component	5	0.278881	ENSSSCG00000017583	SGCA	sarcoglycan alpha [Source:NCBI gene;Acc:100240723]	0	0	0.007643	0	0.088343	0.0481123	0	0.048865	0.0412421	-4.59974	down
GO:0045165	cell fate commitment	biological_process	5	0.278881	ENSSSCG00000004540	ONECUT2	one cut homeobox 2 [Source:NCBI gene;Acc:106507181]	0	0	0	0	0	0.043783	0.033285	0.013458	0.00441862	-7.82219	down
GO:0060079	excitatory postsynaptic potential	biological_process	7	0.278881	ENSSSCG00000009735	P2RX2	purinergic receptor P2X 2 [Source:NCBI gene;Acc:100736581]	0	0.124022	0.170384	0.0845002	0	0	0	0	947.265	9.88762	up
GO:0008081	phosphoric diester hydrolase activity	molecular_function	7	0.283684	ENSSSCG00000023924	PDE1A	phosphodiesterase 1A [Source:NCBI gene;Acc:100152819]	0.184694	0.157517	0.102583	0.207681	0.415303	0.123247	0.136439	0.959707	0.399142	-1.32503	down
GO:1901224	positive regulation of NIK/NF-kappaB signaling	biological_process	10	0.288455	ENSSSCG00000026695	TNFSF14	TNF superfamily member 14 [Source:NCBI gene;Acc:100519468]	0.056141	0	0.20312	0.057648	0	0	0	0	792.273	9.62985	up
GO:0042472	inner ear morphogenesis	biological_process	6	0.288455	ENSSSCG00000035421	ATP8A2	phospholipid-transporting ATPase IB [Source:NCBI gene;Acc:100523747]	0	0	0	0	0	0.106941	0	0	0.00374038	-8.0626	down
GO:0050727	regulation of inflammatory response	biological_process	8	0.288455	ENSSSCG00000014561	NLRP6	NLR family pyrin domain containing 6 [Source:NCBI gene;Acc:100519245]	0.104384	0.039459	0.016589	0.052776	0.51811	0.05228	0.071686	0.125618	0.277725	-1.84827	down
GO:0005811	lipid droplet	cellular_component	6	0.288455	ENSSSCG00000001844	PLIN1	perilipin 1 [Source:NCBI gene;Acc:654411]	0.0876927	0	0.0253353	0.169325	0	0	0	0	705.882	9.46328	up
GO:0006413	translational initiation	biological_process	5	0.288455	ENSSSCG00000014052	EIF4E1B	eukaryotic translation initiation factor 4E family member 1B [Source:NCBI gene;Acc:100523233]	0.188853	0	0.057771	0.658422	0	0	0.033915	0.007078	22.0781	4.46454	up
GO:0051965	positive regulation of synapse assembly	biological_process	7	0.288455	ENSSSCG00000024492	EPHB1	EPH receptor B1 [Source:NCBI gene;Acc:100524585]	0.040072	0.135855	0.125182	0.079682	0.16303	0.106112	0.412634	0.215447	0.424411	-1.23647	down
GO:0009055	electron transfer activity	molecular_function	5	0.288455	ENSSSCG00000008522	XDH	xanthine dehydrogenase [Source:NCBI gene;Acc:100515259]	0.252166	0.115657	0.157807	0.298556	0.0307525	0.0547913	0.0339726	0.0307205	5.48591	2.45573	up
GO:0015629	actin cytoskeleton	cellular_component	7	0.292299	ENSSSCG00000004540	ONECUT2	one cut homeobox 2 [Source:NCBI gene;Acc:106507181]	0	0	0	0	0	0.043783	0.033285	0.013458	0.00441862	-7.82219	down
GO:0015629	actin cytoskeleton	cellular_component	7	0.292299	ENSSSCG00000037457	HSPB7	heat shock protein family B (small) member 7 [Source:NCBI gene;Acc:100627988]	0.139649	0.020884	0.065506	0	1.15429	0.069848	0.043008	0.206936	0.153342	-2.70517	down
GO:0045727	positive regulation of translation	biological_process	10	0.293195	ENSSSCG00000020970	IL6	interleukin 6 [Source:NCBI gene;Acc:399500]	2.51923	2.82316	4.87588	5.13129	5.23923	6.45856	9.15744	20.8768	0.367813	-1.44296	down
GO:0051216	cartilage development	biological_process	6	0.293195	ENSSSCG00000014988	MMP13	matrix metallopeptidase 13 [Source:NCBI gene;Acc:397346]	4.41573	0.779192	2.73243	0.822949	1.12681	0.478646	0.65519	0.178644	3.58723	1.84287	up
GO:0046983	protein dimerization activity	molecular_function	5	0.294755	ENSSSCG00000031080	HAND1	heart and neural crest derivatives expressed 1 [Source:NCBI gene;Acc:541594]	0.012135	0.076182	0	0.013521	0	0	0	0	254.595	7.99206	up
GO:0046983	protein dimerization activity	molecular_function	5	0.294755	ENSSSCG00000039803	ENSSSCG00000039803		0	0	0	7.05623	0	0	0	0	17640.6	14.1066	up
GO:0030097	hemopoiesis	biological_process	7	0.297903	ENSSSCG00000040317	SOD2	superoxide dismutase 2 [Source:NCBI gene;Acc:100154319]	440.443	811.833	177.56	447.583	341.528	313.897	96.7074	127.848	2.13348	1.09321	up
GO:0007368	determination of left/right symmetry	biological_process	7	0.297903	ENSSSCG00000011069	ARMC4	armadillo repeat containing 4 [Source:NCBI gene;Acc:100516925]	0.0158597	0.0121004	0	0	0.0386265	0.0782197	0.0455913	0.0130502	0.159328	-2.64993	down
GO:0007218	neuropeptide signaling pathway	biological_process	6	0.302581	ENSSSCG00000037684	PDYN	prodynorphin [Source:NCBI gene;Acc:445529]	1.54458	1.47723	2.49974	1.41827	2.6421	22.0147	1.64546	2.12709	0.244107	-2.03441	down
GO:0006919	activation of cysteine-type endopeptidase activity involved in apoptotic process	biological_process	11	0.302581	ENSSSCG00000008522	XDH	xanthine dehydrogenase [Source:NCBI gene;Acc:100515259]	0.252166	0.115657	0.157807	0.298556	0.0307525	0.0547913	0.0339726	0.0307205	5.48591	2.45573	up
GO:0032091	negative regulation of protein binding	biological_process	7	0.307227	ENSSSCG00000017557	WFIKKN2	WAP, follistatin/kazal, immunoglobulin, kunitz and netrin domain containing 2 [Source:NCBI gene;Acc:100512012]	0.249887	0.205871	0.126918	0.160349	0.071994	0.093531	0.050522	0.09217	2.41072	1.26946	up
GO:0043433	negative regulation of DNA-binding transcription factor activity	biological_process	6	0.307227	ENSSSCG00000031080	HAND1	heart and neural crest derivatives expressed 1 [Source:NCBI gene;Acc:541594]	0.012135	0.076182	0	0.013521	0	0	0	0	254.595	7.99206	up
GO:0005262	calcium channel activity	molecular_function	8	0.307227	ENSSSCG00000013754	CACNA1A	calcium voltage-gated channel subunit alpha1 A [Source:NCBI gene;Acc:100525387]	0.02133	0.00985703	0.0134541	0.0178186	0.0498397	0.0472018	0.0284099	0.0521617	0.351662	-1.50774	down
GO:0003713	transcription coactivator activity	molecular_function	5	0.30947	ENSSSCG00000004340	FHL5	four and a half LIM domains 5 [Source:NCBI gene;Acc:100152075]	0.865883	0.935866	0.776209	0.780599	3.28804	1.25704	0.754613	4.07008	0.358446	-1.48017	down
GO:0003713	transcription coactivator activity	molecular_function	5	0.30947	ENSSSCG00000031080	HAND1	heart and neural crest derivatives expressed 1 [Source:NCBI gene;Acc:541594]	0.012135	0.076182	0	0.013521	0	0	0	0	254.595	7.99206	up
GO:0005819	spindle	cellular_component	6	0.311843	ENSSSCG00000031976	ANKRD53	ankyrin repeat domain 53 [Source:NCBI gene;Acc:100739578]	0.0842339	0	0.0529971	0	0	0	0	0	343.078	8.42239	up
GO:0010629	negative regulation of gene expression	biological_process	8	0.314362	ENSSSCG00000008522	XDH	xanthine dehydrogenase [Source:NCBI gene;Acc:100515259]	0.252166	0.115657	0.157807	0.298556	0.0307525	0.0547913	0.0339726	0.0307205	5.48591	2.45573	up
GO:0010629	negative regulation of gene expression	biological_process	8	0.314362	ENSSSCG00000037358	ENSSSCG00000037358	serum amyloid A-3 protein [Source:NCBI gene;Acc:733603]	16.2985	26.5234	0.799804	11.4058	5.65267	2.30216	0.073928	0.729559	6.28289	2.65143	up
GO:0032088	negative regulation of NF-kappaB transcription factor activity	biological_process	7	0.316429	ENSSSCG00000013865	NWD1	NACHT and WD repeat domain containing 1 [Source:NCBI gene;Acc:100737957]	0	0	0	0	0	0.0134069	0.026871	0.0161217	0.00709226	-7.13954	down
GO:0060021	roof of mouth development	biological_process	5	0.316429	ENSSSCG00000017557	WFIKKN2	WAP, follistatin/kazal, immunoglobulin, kunitz and netrin domain containing 2 [Source:NCBI gene;Acc:100512012]	0.249887	0.205871	0.126918	0.160349	0.071994	0.093531	0.050522	0.09217	2.41072	1.26946	up
GO:0008076	voltage-gated potassium channel complex	cellular_component	9	0.316429	ENSSSCG00000010325	KCNMA1	potassium calcium-activated channel subfamily M alpha 1 [Source:NCBI gene;Acc:397434]	0.11953	0.0259335	0.020903	0.0945038	0.585101	0.119901	0.110312	0.14883	0.270572	-1.88592	down
GO:0006812	cation transport	biological_process	7	0.320984	ENSSSCG00000009735	P2RX2	purinergic receptor P2X 2 [Source:NCBI gene;Acc:100736581]	0	0.124022	0.170384	0.0845002	0	0	0	0	947.265	9.88762	up
GO:0005249	voltage-gated potassium channel activity	molecular_function	9	0.320984	ENSSSCG00000010325	KCNMA1	potassium calcium-activated channel subfamily M alpha 1 [Source:NCBI gene;Acc:397434]	0.11953	0.0259335	0.020903	0.0945038	0.585101	0.119901	0.110312	0.14883	0.270572	-1.88592	down
GO:0030425	dendrite	cellular_component	6	0.321687	ENSSSCG00000013754	CACNA1A	calcium voltage-gated channel subunit alpha1 A [Source:NCBI gene;Acc:100525387]	0.02133	0.00985703	0.0134541	0.0178186	0.0498397	0.0472018	0.0284099	0.0521617	0.351662	-1.50774	down
GO:0030425	dendrite	cellular_component	6	0.321687	ENSSSCG00000040746	LRP2	LDL receptor related protein 2 [Source:NCBI gene;Acc:100519689]	0.295167	0.701586	0.542765	0.959293	0.184023	0.427094	0.234247	0.380174	2.03895	1.02783	up
GO:0050660	flavin adenine dinucleotide binding	molecular_function	6	0.325509	ENSSSCG00000008522	XDH	xanthine dehydrogenase [Source:NCBI gene;Acc:100515259]	0.252166	0.115657	0.157807	0.298556	0.0307525	0.0547913	0.0339726	0.0307205	5.48591	2.45573	up
GO:0050804	modulation of chemical synaptic transmission	biological_process	8	0.330004	ENSSSCG00000024492	EPHB1	EPH receptor B1 [Source:NCBI gene;Acc:100524585]	0.040072	0.135855	0.125182	0.079682	0.16303	0.106112	0.412634	0.215447	0.424411	-1.23647	down
GO:0043197	dendritic spine	cellular_component	7	0.330004	ENSSSCG00000016022	ZNF804A	zinc finger protein 804A [Source:NCBI gene;Acc:100524346]	0.0553859	0.12664	0.189437	0.0925699	0.0276792	0.047276	0.056554	0.0325941	2.82769	1.49962	up
GO:0042626	ATPase activity, coupled to transmembrane movement of substances	molecular_function	8	0.330004	ENSSSCG00000001401	ENSSSCG00000001401	ATPase H+ transporting V1 subunit G2 [Source:NCBI gene;Acc:100152358]	0.076847	0.137269	0.14906	0.045167	0.263849	0.368966	0.395026	0.27871	0.312535	-1.67791	down
GO:0002376	immune system process	biological_process	3	0.33447	ENSSSCG00000021383	CGAS	cyclic GMP-AMP synthase [Source:NCBI gene;Acc:100516408]	0.211824	0.107048	0	0.176027	0.675164	0.29819	0.213437	0.677419	0.265474	-1.91336	down
GO:0000287	magnesium ion binding	molecular_function	7	0.336279	ENSSSCG00000004646	ATP8B4	ATPase phospholipid transporting 8B4 (putative) [Source:NCBI gene;Acc:100154720]	0.0615731	0.45834	0.231173	1.22783	0.154983	0.170382	0.0929394	0.217412	3.11289	1.63825	up
GO:0000287	magnesium ion binding	molecular_function	7	0.336279	ENSSSCG00000035421	ATP8A2	phospholipid-transporting ATPase IB [Source:NCBI gene;Acc:100523747]	0	0	0	0	0	0.106941	0	0	0.00374038	-8.0626	down
GO:0007179	transforming growth factor beta receptor signaling pathway	biological_process	8	0.338906	ENSSSCG00000017557	WFIKKN2	WAP, follistatin/kazal, immunoglobulin, kunitz and netrin domain containing 2 [Source:NCBI gene;Acc:100512012]	0.249887	0.205871	0.126918	0.160349	0.071994	0.093531	0.050522	0.09217	2.41072	1.26946	up
GO:0008584	male gonad development	biological_process	7	0.338906	ENSSSCG00000040746	LRP2	LDL receptor related protein 2 [Source:NCBI gene;Acc:100519689]	0.295167	0.701586	0.542765	0.959293	0.184023	0.427094	0.234247	0.380174	2.03895	1.02783	up
GO:0090575	RNA polymerase II transcription factor complex	cellular_component	6	0.338906	ENSSSCG00000031080	HAND1	heart and neural crest derivatives expressed 1 [Source:NCBI gene;Acc:541594]	0.012135	0.076182	0	0.013521	0	0	0	0	254.595	7.99206	up
GO:0005604	basement membrane	cellular_component	6	0.343313	ENSSSCG00000040070	FREM3	FRAS1 related extracellular matrix 3 [Source:NCBI gene;Acc:100526232]	0.100141	0.05369	0.027404	0.014864	0	0	0.008584	0.011156	9.93409	3.31239	up
GO:0007204	positive regulation of cytosolic calcium ion concentration	biological_process	13	0.343313	ENSSSCG00000013754	CACNA1A	calcium voltage-gated channel subunit alpha1 A [Source:NCBI gene;Acc:100525387]	0.02133	0.00985703	0.0134541	0.0178186	0.0498397	0.0472018	0.0284099	0.0521617	0.351662	-1.50774	down
GO:0007229	integrin-mediated signaling pathway	biological_process	6	0.34769	ENSSSCG00000000257	ITGB7	integrin subunit beta 7 [Source:NCBI gene;Acc:397221]	0.185201	0.227381	0.35861	0.515071	0.180725	0.12515	0.146028	0.18352	2.02426	1.01739	up
GO:0030018	Z disc	cellular_component	5	0.34769	ENSSSCG00000004340	FHL5	four and a half LIM domains 5 [Source:NCBI gene;Acc:100152075]	0.865883	0.935866	0.776209	0.780599	3.28804	1.25704	0.754613	4.07008	0.358446	-1.48017	down
GO:0005930	axoneme	cellular_component	6	0.34769	ENSSSCG00000011069	ARMC4	armadillo repeat containing 4 [Source:NCBI gene;Acc:100516925]	0.0158597	0.0121004	0	0	0.0386265	0.0782197	0.0455913	0.0130502	0.159328	-2.64993	down
GO:0050731	positive regulation of peptidyl-tyrosine phosphorylation	biological_process	11	0.34769	ENSSSCG00000020970	IL6	interleukin 6 [Source:NCBI gene;Acc:399500]	2.51923	2.82316	4.87588	5.13129	5.23923	6.45856	9.15744	20.8768	0.367813	-1.44296	down
GO:0001933	negative regulation of protein phosphorylation	biological_process	10	0.34769	ENSSSCG00000008522	XDH	xanthine dehydrogenase [Source:NCBI gene;Acc:100515259]	0.252166	0.115657	0.157807	0.298556	0.0307525	0.0547913	0.0339726	0.0307205	5.48591	2.45573	up
GO:0031012	extracellular matrix	cellular_component	4	0.35078	ENSSSCG00000001872	LINGO1	leucine rich repeat and Ig domain containing 1 [Source:NCBI gene;Acc:100155465]	0.100141	0.0945755	0.0313381	0.0508434	0.301034	0.291748	0.0916974	0.132854	0.338782	-1.56157	down
GO:0031012	extracellular matrix	cellular_component	4	0.35078	ENSSSCG00000014988	MMP13	matrix metallopeptidase 13 [Source:NCBI gene;Acc:397346]	4.41573	0.779192	2.73243	0.822949	1.12681	0.478646	0.65519	0.178644	3.58723	1.84287	up
GO:0019903	protein phosphatase binding	molecular_function	7	0.352039	ENSSSCG00000003069	KCNN4	potassium calcium-activated channel subfamily N member 4 [Source:NCBI gene;Acc:397081]	0	0	0.140078	0.105751	0	0	0	0	614.572	9.26344	up
GO:0007409	axonogenesis	biological_process	9	0.352039	ENSSSCG00000035421	ATP8A2	phospholipid-transporting ATPase IB [Source:NCBI gene;Acc:100523747]	0	0	0	0	0	0.106941	0	0	0.00374038	-8.0626	down
GO:0006955	immune response	biological_process	4	0.355591	ENSSSCG00000020970	IL6	interleukin 6 [Source:NCBI gene;Acc:399500]	2.51923	2.82316	4.87588	5.13129	5.23923	6.45856	9.15744	20.8768	0.367813	-1.44296	down
GO:0006955	immune response	biological_process	4	0.355591	ENSSSCG00000026695	TNFSF14	TNF superfamily member 14 [Source:NCBI gene;Acc:100519468]	0.056141	0	0.20312	0.057648	0	0	0	0	792.273	9.62985	up
GO:0016042	lipid catabolic process	biological_process	6	0.356359	ENSSSCG00000001844	PLIN1	perilipin 1 [Source:NCBI gene;Acc:654411]	0.0876927	0	0.0253353	0.169325	0	0	0	0	705.882	9.46328	up
GO:0042493	response to drug	biological_process	5	0.36065	ENSSSCG00000008742	CD38	CD38 molecule [Source:NCBI gene;Acc:100511702]	3.70184	3.39609	0.812398	2.31241	1.78349	1.58737	0.572801	0.953064	2.08767	1.06189	up
GO:0005768	endosome	cellular_component	7	0.362784	ENSSSCG00000035421	ATP8A2	phospholipid-transporting ATPase IB [Source:NCBI gene;Acc:100523747]	0	0	0	0	0	0.106941	0	0	0.00374038	-8.0626	down
GO:0005768	endosome	cellular_component	7	0.362784	ENSSSCG00000040746	LRP2	LDL receptor related protein 2 [Source:NCBI gene;Acc:100519689]	0.295167	0.701586	0.542765	0.959293	0.184023	0.427094	0.234247	0.380174	2.03895	1.02783	up
GO:0003690	double-stranded DNA binding	molecular_function	7	0.364914	ENSSSCG00000021383	CGAS	cyclic GMP-AMP synthase [Source:NCBI gene;Acc:100516408]	0.211824	0.107048	0	0.176027	0.675164	0.29819	0.213437	0.677419	0.265474	-1.91336	down
GO:0000724	double-strand break repair via homologous recombination	biological_process	10	0.364914	ENSSSCG00000011910	ENSSSCG00000011910	SEM1, 26S proteasome complex subunit [Source:NCBI gene;Acc:100155621]	0.832802	0.563205	2.46644	2.17273	0.358046	0.75689	0.188579	0.116318	4.25063	2.08768	up
GO:0045177	apical part of cell	cellular_component	4	0.369149	ENSSSCG00000040746	LRP2	LDL receptor related protein 2 [Source:NCBI gene;Acc:100519689]	0.295167	0.701586	0.542765	0.959293	0.184023	0.427094	0.234247	0.380174	2.03895	1.02783	up
GO:0051087	chaperone binding	molecular_function	5	0.369149	ENSSSCG00000040746	LRP2	LDL receptor related protein 2 [Source:NCBI gene;Acc:100519689]	0.295167	0.701586	0.542765	0.959293	0.184023	0.427094	0.234247	0.380174	2.03895	1.02783	up
GO:0043065	positive regulation of apoptotic process	biological_process	9	0.369948	ENSSSCG00000010325	KCNMA1	potassium calcium-activated channel subfamily M alpha 1 [Source:NCBI gene;Acc:397434]	0.11953	0.0259335	0.020903	0.0945038	0.585101	0.119901	0.110312	0.14883	0.270572	-1.88592	down
GO:0043065	positive regulation of apoptotic process	biological_process	9	0.369948	ENSSSCG00000020970	IL6	interleukin 6 [Source:NCBI gene;Acc:399500]	2.51923	2.82316	4.87588	5.13129	5.23923	6.45856	9.15744	20.8768	0.367813	-1.44296	down
GO:0007160	cell-matrix adhesion	biological_process	6	0.373356	ENSSSCG00000000257	ITGB7	integrin subunit beta 7 [Source:NCBI gene;Acc:397221]	0.185201	0.227381	0.35861	0.515071	0.180725	0.12515	0.146028	0.18352	2.02426	1.01739	up
GO:0008234	cysteine-type peptidase activity	molecular_function	7	0.373356	ENSSSCG00000034746	CAPN8	calpain 8 [Source:NCBI gene;Acc:100625563]	0	0	0	0	0	0.211644	0.0716674	0.528428	0.000492769	-10.9868	down
GO:0007005	mitochondrion organization	biological_process	6	0.373356	ENSSSCG00000040317	SOD2	superoxide dismutase 2 [Source:NCBI gene;Acc:100154319]	440.443	811.833	177.56	447.583	341.528	313.897	96.7074	127.848	2.13348	1.09321	up
GO:0005923	bicellular tight junction	cellular_component	6	0.377535	ENSSSCG00000022961	CLMP	CXADR like membrane protein [Source:NCBI gene;Acc:100512427]	13.811	22.0358	38.0115	16.4248	11.3576	12.5107	8.55634	8.44736	2.20892	1.14334	up
GO:0001843	neural tube closure	biological_process	7	0.381686	ENSSSCG00000040746	LRP2	LDL receptor related protein 2 [Source:NCBI gene;Acc:100519689]	0.295167	0.701586	0.542765	0.959293	0.184023	0.427094	0.234247	0.380174	2.03895	1.02783	up
GO:0006874	cellular calcium ion homeostasis	biological_process	11	0.381686	ENSSSCG00000034163	PLN	phospholamban [Source:NCBI gene;Acc:397421]	1.31763	0.663593	1.79408	2.5748	6.43865	2.88279	3.72296	8.02146	0.301441	-1.73005	down
GO:0007030	Golgi organization	biological_process	6	0.38581	ENSSSCG00000004646	ATP8B4	ATPase phospholipid transporting 8B4 (putative) [Source:NCBI gene;Acc:100154720]	0.0615731	0.45834	0.231173	1.22783	0.154983	0.170382	0.0929394	0.217412	3.11289	1.63825	up
GO:0045211	postsynaptic membrane	cellular_component	5	0.38581	ENSSSCG00000010325	KCNMA1	potassium calcium-activated channel subfamily M alpha 1 [Source:NCBI gene;Acc:397434]	0.11953	0.0259335	0.020903	0.0945038	0.585101	0.119901	0.110312	0.14883	0.270572	-1.88592	down
GO:0009791	post-embryonic development	biological_process	4	0.389907	ENSSSCG00000040317	SOD2	superoxide dismutase 2 [Source:NCBI gene;Acc:100154319]	440.443	811.833	177.56	447.583	341.528	313.897	96.7074	127.848	2.13348	1.09321	up
GO:0007169	transmembrane receptor protein tyrosine kinase signaling pathway	biological_process	7	0.402036	ENSSSCG00000024492	EPHB1	EPH receptor B1 [Source:NCBI gene;Acc:100524585]	0.040072	0.135855	0.125182	0.079682	0.16303	0.106112	0.412634	0.215447	0.424411	-1.23647	down
GO:0007626	locomotory behavior	biological_process	4	0.402036	ENSSSCG00000040317	SOD2	superoxide dismutase 2 [Source:NCBI gene;Acc:100154319]	440.443	811.833	177.56	447.583	341.528	313.897	96.7074	127.848	2.13348	1.09321	up
GO:0031982	vesicle	cellular_component	5	0.413926	ENSSSCG00000003069	KCNN4	potassium calcium-activated channel subfamily N member 4 [Source:NCBI gene;Acc:397081]	0	0	0.140078	0.105751	0	0	0	0	614.572	9.26344	up
GO:0000922	spindle pole	cellular_component	6	0.413926	ENSSSCG00000031976	ANKRD53	ankyrin repeat domain 53 [Source:NCBI gene;Acc:100739578]	0.0842339	0	0.0529971	0	0	0	0	0	343.078	8.42239	up
GO:0006898	receptor-mediated endocytosis	biological_process	8	0.413926	ENSSSCG00000040746	LRP2	LDL receptor related protein 2 [Source:NCBI gene;Acc:100519689]	0.295167	0.701586	0.542765	0.959293	0.184023	0.427094	0.234247	0.380174	2.03895	1.02783	up
GO:0006366	transcription by RNA polymerase II	biological_process	9	0.417837	ENSSSCG00000031080	HAND1	heart and neural crest derivatives expressed 1 [Source:NCBI gene;Acc:541594]	0.012135	0.076182	0	0.013521	0	0	0	0	254.595	7.99206	up
GO:0005524	ATP binding	molecular_function	5	0.424998	ENSSSCG00000004646	ATP8B4	ATPase phospholipid transporting 8B4 (putative) [Source:NCBI gene;Acc:100154720]	0.0615731	0.45834	0.231173	1.22783	0.154983	0.170382	0.0929394	0.217412	3.11289	1.63825	up
GO:0005524	ATP binding	molecular_function	5	0.424998	ENSSSCG00000008294	ACTG2	actin, gamma 2, smooth muscle, enteric [Source:NCBI gene;Acc:100520667]	4.60373	0.917775	6.16586	1.4254	13.9919	5.35347	4.98534	7.95061	0.406204	-1.29973	down
GO:0005524	ATP binding	molecular_function	5	0.424998	ENSSSCG00000009543	MYO16	myosin XVI [Source:NCBI gene;Acc:102161679]	0	0.044785	0	0.127558	0	0	0	0	430.858	8.75107	up
GO:0005524	ATP binding	molecular_function	5	0.424998	ENSSSCG00000009735	P2RX2	purinergic receptor P2X 2 [Source:NCBI gene;Acc:100736581]	0	0.124022	0.170384	0.0845002	0	0	0	0	947.265	9.88762	up
GO:0005524	ATP binding	molecular_function	5	0.424998	ENSSSCG00000012137	BMX	BMX non-receptor tyrosine kinase [Source:NCBI gene;Acc:100516528]	0.470346	0.451285	0.546133	1.00719	1.1298	0.604344	0.774901	3.02998	0.446821	-1.16223	down
GO:0005524	ATP binding	molecular_function	5	0.424998	ENSSSCG00000014561	NLRP6	NLR family pyrin domain containing 6 [Source:NCBI gene;Acc:100519245]	0.104384	0.039459	0.016589	0.052776	0.51811	0.05228	0.071686	0.125618	0.277725	-1.84827	down
GO:0005524	ATP binding	molecular_function	5	0.424998	ENSSSCG00000021383	CGAS	cyclic GMP-AMP synthase [Source:NCBI gene;Acc:100516408]	0.211824	0.107048	0	0.176027	0.675164	0.29819	0.213437	0.677419	0.265474	-1.91336	down
GO:0005524	ATP binding	molecular_function	5	0.424998	ENSSSCG00000024492	EPHB1	EPH receptor B1 [Source:NCBI gene;Acc:100524585]	0.040072	0.135855	0.125182	0.079682	0.16303	0.106112	0.412634	0.215447	0.424411	-1.23647	down
GO:0005524	ATP binding	molecular_function	5	0.424998	ENSSSCG00000035421	ATP8A2	phospholipid-transporting ATPase IB [Source:NCBI gene;Acc:100523747]	0	0	0	0	0	0.106941	0	0	0.00374038	-8.0626	down
GO:0005178	integrin binding	molecular_function	6	0.425582	ENSSSCG00000000257	ITGB7	integrin subunit beta 7 [Source:NCBI gene;Acc:397221]	0.185201	0.227381	0.35861	0.515071	0.180725	0.12515	0.146028	0.18352	2.02426	1.01739	up
GO:0000981	DNA-binding transcription factor activity, RNA polymerase II-specific	molecular_function	5	0.428297	ENSSSCG00000002658	FOXL1	forkhead box L1 [Source:NCBI gene;Acc:100511634]	1.09758	0.23386	0.197345	0.099179	0.024694	0	0.053966	0.20144	5.81208	2.53905	up
GO:0000981	DNA-binding transcription factor activity, RNA polymerase II-specific	molecular_function	5	0.428297	ENSSSCG00000031080	HAND1	heart and neural crest derivatives expressed 1 [Source:NCBI gene;Acc:541594]	0.012135	0.076182	0	0.013521	0	0	0	0	254.595	7.99206	up
GO:0006952	defense response	biological_process	5	0.429416	ENSSSCG00000031022	IFN-DELTA-7	interferon delta 7 [Source:NCBI gene;Acc:100303727]	0.262573	0.106276	0.0713	0.396111	0	0	0	0	2090.65	11.0297	up
GO:0006979	response to oxidative stress	biological_process	5	0.429416	ENSSSCG00000040317	SOD2	superoxide dismutase 2 [Source:NCBI gene;Acc:100154319]	440.443	811.833	177.56	447.583	341.528	313.897	96.7074	127.848	2.13348	1.09321	up
GO:0001501	skeletal system development	biological_process	6	0.429416	ENSSSCG00000017557	WFIKKN2	WAP, follistatin/kazal, immunoglobulin, kunitz and netrin domain containing 2 [Source:NCBI gene;Acc:100512012]	0.249887	0.205871	0.126918	0.160349	0.071994	0.093531	0.050522	0.09217	2.41072	1.26946	up
GO:0051091	positive regulation of DNA-binding transcription factor activity	biological_process	6	0.437008	ENSSSCG00000020970	IL6	interleukin 6 [Source:NCBI gene;Acc:399500]	2.51923	2.82316	4.87588	5.13129	5.23923	6.45856	9.15744	20.8768	0.367813	-1.44296	down
GO:0007601	visual perception	biological_process	8	0.437008	ENSSSCG00000001636	GUCA1A	guanylate cyclase activator 1A [Source:NCBI gene;Acc:100739200]	0.062988	0.164763	0.236424	0.111331	0.353288	0.30342	0.380666	0.222057	0.456957	-1.12987	down
GO:0042593	glucose homeostasis	biological_process	8	0.4445	ENSSSCG00000013754	CACNA1A	calcium voltage-gated channel subunit alpha1 A [Source:NCBI gene;Acc:100525387]	0.02133	0.00985703	0.0134541	0.0178186	0.0498397	0.0472018	0.0284099	0.0521617	0.351662	-1.50774	down
GO:0009897	external side of plasma membrane	cellular_component	5	0.446384	ENSSSCG00000003386	TNFRSF9	TNF receptor superfamily member 9 [Source:NCBI gene;Acc:100519368]	0.0695877	0.12297	0.188732	0.130953	0.288478	0.336174	0.185547	0.284585	0.467894	-1.09575	down
GO:0009897	external side of plasma membrane	cellular_component	5	0.446384	ENSSSCG00000040746	LRP2	LDL receptor related protein 2 [Source:NCBI gene;Acc:100519689]	0.295167	0.701586	0.542765	0.959293	0.184023	0.427094	0.234247	0.380174	2.03895	1.02783	up
GO:0003774	motor activity	molecular_function	9	0.451893	ENSSSCG00000009543	MYO16	myosin XVI [Source:NCBI gene;Acc:102161679]	0	0.044785	0	0.127558	0	0	0	0	430.858	8.75107	up
GO:0071222	cellular response to lipopolysaccharide	biological_process	8	0.451893	ENSSSCG00000020970	IL6	interleukin 6 [Source:NCBI gene;Acc:399500]	2.51923	2.82316	4.87588	5.13129	5.23923	6.45856	9.15744	20.8768	0.367813	-1.44296	down
GO:0005814	centriole	cellular_component	6	0.455553	ENSSSCG00000003191	TSKS	testis specific serine kinase substrate [Source:NCBI gene;Acc:100522079]	0	0	0	0	0.090648	0	0.098386	0.048463	0.00168423	-9.21369	down
GO:0098793	presynapse	cellular_component	4	0.4628	ENSSSCG00000013754	CACNA1A	calcium voltage-gated channel subunit alpha1 A [Source:NCBI gene;Acc:100525387]	0.02133	0.00985703	0.0134541	0.0178186	0.0498397	0.0472018	0.0284099	0.0521617	0.351662	-1.50774	down
GO:0007010	cytoskeleton organization	biological_process	6	0.4628	ENSSSCG00000029077	TUBAL3	tubulin alpha like 3 [Source:NCBI gene;Acc:100623355]	0.007797	0.03003	0.008833	0.019154	0.076438	0.038824	0.057903	0.048124	0.297412	-1.74947	down
GO:0008083	growth factor activity	molecular_function	7	0.466388	ENSSSCG00000020970	IL6	interleukin 6 [Source:NCBI gene;Acc:399500]	2.51923	2.82316	4.87588	5.13129	5.23923	6.45856	9.15744	20.8768	0.367813	-1.44296	down
GO:0009986	cell surface	cellular_component	4	0.467615	ENSSSCG00000000257	ITGB7	integrin subunit beta 7 [Source:NCBI gene;Acc:397221]	0.185201	0.227381	0.35861	0.515071	0.180725	0.12515	0.146028	0.18352	2.02426	1.01739	up
GO:0009986	cell surface	cellular_component	4	0.467615	ENSSSCG00000001616	TREML2	triggering receptor expressed on myeloid cells like 2 [Source:NCBI gene;Acc:100738047]	0.054533	0.06149	0.031063	0.055344	0	0	0	0.017578	11.5161	3.52558	up
GO:0009986	cell surface	cellular_component	4	0.467615	ENSSSCG00000002927	LRFN3	leucine rich repeat and fibronectin type III domain containing 3 [Source:NCBI gene;Acc:100738610]	0	0	0	0	0.160984	0	0.026081	0.264803	0.000885214	-10.1417	down
GO:0000226	microtubule cytoskeleton organization	biological_process	7	0.469952	ENSSSCG00000010103	ENSSSCG00000010103	tubulin alpha-3 chain [Source:NCBI gene;Acc:100155138]	0.107222	0.227949	0.129334	0.240343	0	0.068874	0	0.042865	6.30799	2.65718	up
GO:0070588	calcium ion transmembrane transport	biological_process	11	0.469952	ENSSSCG00000013754	CACNA1A	calcium voltage-gated channel subunit alpha1 A [Source:NCBI gene;Acc:100525387]	0.02133	0.00985703	0.0134541	0.0178186	0.0498397	0.0472018	0.0284099	0.0521617	0.351662	-1.50774	down
GO:0004222	metalloendopeptidase activity	molecular_function	8	0.480503	ENSSSCG00000014988	MMP13	matrix metallopeptidase 13 [Source:NCBI gene;Acc:397346]	4.41573	0.779192	2.73243	0.822949	1.12681	0.478646	0.65519	0.178644	3.58723	1.84287	up
GO:0090090	negative regulation of canonical Wnt signaling pathway	biological_process	10	0.483974	ENSSSCG00000003423	DRAXIN	dorsal inhibitory axon guidance protein [Source:NCBI gene;Acc:100524629]	0.00774	0.008041	0.015319	0.025872	0	0	0	0	142.43	7.15411	up
GO:0005102	signaling receptor binding	molecular_function	5	0.492312	ENSSSCG00000026695	TNFSF14	TNF superfamily member 14 [Source:NCBI gene;Acc:100519468]	0.056141	0	0.20312	0.057648	0	0	0	0	792.273	9.62985	up
GO:0005102	signaling receptor binding	molecular_function	5	0.492312	ENSSSCG00000039300	IL27	interleukin 27 [Source:NCBI gene;Acc:493187]	0.387126	0.129744	0.126177	0.125406	0.042583	0	0	0	18.046	4.17361	up
GO:0062023	collagen-containing extracellular matrix	cellular_component	5	0.494248	ENSSSCG00000036007	MFAP4	microfibril associated protein 4 [Source:NCBI gene;Acc:110256120]	0.672427	0.116995	0.027877	0.053744	2.46429	0.02652	0.026398	2.87465	0.161548	-2.62997	down
GO:0008289	lipid binding	molecular_function	4	0.494248	ENSSSCG00000025681	ENSSSCG00000025681	phosphatidylcholine transfer protein [Source:NCBI gene;Acc:100621260]	0.037365	0	0	0	0	0.274144	0.278924	0.102669	0.0569817	-4.13336	down
GO:0005886	plasma membrane	cellular_component	4	0.49487	ENSSSCG00000003069	KCNN4	potassium calcium-activated channel subfamily N member 4 [Source:NCBI gene;Acc:397081]	0	0	0.140078	0.105751	0	0	0	0	614.572	9.26344	up
GO:0005886	plasma membrane	cellular_component	4	0.49487	ENSSSCG00000003386	TNFRSF9	TNF receptor superfamily member 9 [Source:NCBI gene;Acc:100519368]	0.0695877	0.12297	0.188732	0.130953	0.288478	0.336174	0.185547	0.284585	0.467894	-1.09575	down
GO:0005886	plasma membrane	cellular_component	4	0.49487	ENSSSCG00000004646	ATP8B4	ATPase phospholipid transporting 8B4 (putative) [Source:NCBI gene;Acc:100154720]	0.0615731	0.45834	0.231173	1.22783	0.154983	0.170382	0.0929394	0.217412	3.11289	1.63825	up
GO:0005886	plasma membrane	cellular_component	4	0.49487	ENSSSCG00000005584	CRB2	crumbs cell polarity complex component 2 [Source:NCBI gene;Acc:100511431]	0.040431	0.018636	0.010025	0.022794	0	0	0	0.010935	8.40293	3.07089	up
GO:0005886	plasma membrane	cellular_component	4	0.49487	ENSSSCG00000008742	CD38	CD38 molecule [Source:NCBI gene;Acc:100511702]	3.70184	3.39609	0.812398	2.31241	1.78349	1.58737	0.572801	0.953064	2.08767	1.06189	up
GO:0005886	plasma membrane	cellular_component	4	0.49487	ENSSSCG00000009735	P2RX2	purinergic receptor P2X 2 [Source:NCBI gene;Acc:100736581]	0	0.124022	0.170384	0.0845002	0	0	0	0	947.265	9.88762	up
GO:0005886	plasma membrane	cellular_component	4	0.49487	ENSSSCG00000010325	KCNMA1	potassium calcium-activated channel subfamily M alpha 1 [Source:NCBI gene;Acc:397434]	0.11953	0.0259335	0.020903	0.0945038	0.585101	0.119901	0.110312	0.14883	0.270572	-1.88592	down
GO:0005886	plasma membrane	cellular_component	4	0.49487	ENSSSCG00000012137	BMX	BMX non-receptor tyrosine kinase [Source:NCBI gene;Acc:100516528]	0.470346	0.451285	0.546133	1.00719	1.1298	0.604344	0.774901	3.02998	0.446821	-1.16223	down
GO:0005886	plasma membrane	cellular_component	4	0.49487	ENSSSCG00000016022	ZNF804A	zinc finger protein 804A [Source:NCBI gene;Acc:100524346]	0.0553859	0.12664	0.189437	0.0925699	0.0276792	0.047276	0.056554	0.0325941	2.82769	1.49962	up
GO:0005886	plasma membrane	cellular_component	4	0.49487	ENSSSCG00000016247	TM4SF20	transmembrane 4 L six family member 20 [Source:NCBI gene;Acc:100513630]	0.45096	0.388991	0.206182	0.350654	0.064814	0.204073	0.141277	0.062815	2.95317	1.56226	up
GO:0005886	plasma membrane	cellular_component	4	0.49487	ENSSSCG00000017583	SGCA	sarcoglycan alpha [Source:NCBI gene;Acc:100240723]	0	0	0.007643	0	0.088343	0.0481123	0	0.048865	0.0412421	-4.59974	down
GO:0005886	plasma membrane	cellular_component	4	0.49487	ENSSSCG00000024492	EPHB1	EPH receptor B1 [Source:NCBI gene;Acc:100524585]	0.040072	0.135855	0.125182	0.079682	0.16303	0.106112	0.412634	0.215447	0.424411	-1.23647	down
GO:0005886	plasma membrane	cellular_component	4	0.49487	ENSSSCG00000027768	SLC29A4	solute carrier family 29 member 4 [Source:NCBI gene;Acc:100624843]	0.07378	0.054982	0.041073	0	0.270753	0.039272	0.15353	0.3182	0.217248	-2.20258	down
GO:0005886	plasma membrane	cellular_component	4	0.49487	ENSSSCG00000035421	ATP8A2	phospholipid-transporting ATPase IB [Source:NCBI gene;Acc:100523747]	0	0	0	0	0	0.106941	0	0	0.00374038	-8.0626	down
GO:0005886	plasma membrane	cellular_component	4	0.49487	ENSSSCG00000037684	PDYN	prodynorphin [Source:NCBI gene;Acc:445529]	1.54458	1.47723	2.49974	1.41827	2.6421	22.0147	1.64546	2.12709	0.244107	-2.03441	down
GO:0000278	mitotic cell cycle	biological_process	5	0.500985	ENSSSCG00000010103	ENSSSCG00000010103	tubulin alpha-3 chain [Source:NCBI gene;Acc:100155138]	0.107222	0.227949	0.129334	0.240343	0	0.068874	0	0.042865	6.30799	2.65718	up
GO:0019221	cytokine-mediated signaling pathway	biological_process	6	0.50432	ENSSSCG00000020970	IL6	interleukin 6 [Source:NCBI gene;Acc:399500]	2.51923	2.82316	4.87588	5.13129	5.23923	6.45856	9.15744	20.8768	0.367813	-1.44296	down
GO:0007155	cell adhesion	biological_process	4	0.519535	ENSSSCG00000000257	ITGB7	integrin subunit beta 7 [Source:NCBI gene;Acc:397221]	0.185201	0.227381	0.35861	0.515071	0.180725	0.12515	0.146028	0.18352	2.02426	1.01739	up
GO:0007155	cell adhesion	biological_process	4	0.519535	ENSSSCG00000039358	SUSD5	sushi domain containing 5 [Source:NCBI gene;Acc:110256562]	0.147395	0.083949	0.045907	0.068649	0.366809	0.158018	0.139422	0.169267	0.414989	-1.26885	down
GO:0045892	negative regulation of transcription, DNA-templated	biological_process	9	0.531002	ENSSSCG00000008742	CD38	CD38 molecule [Source:NCBI gene;Acc:100511702]	3.70184	3.39609	0.812398	2.31241	1.78349	1.58737	0.572801	0.953064	2.08767	1.06189	up
GO:0045892	negative regulation of transcription, DNA-templated	biological_process	9	0.531002	ENSSSCG00000031080	HAND1	heart and neural crest derivatives expressed 1 [Source:NCBI gene;Acc:541594]	0.012135	0.076182	0	0.013521	0	0	0	0	254.595	7.99206	up
GO:0045892	negative regulation of transcription, DNA-templated	biological_process	9	0.531002	ENSSSCG00000037358	ENSSSCG00000037358	serum amyloid A-3 protein [Source:NCBI gene;Acc:733603]	16.2985	26.5234	0.799804	11.4058	5.65267	2.30216	0.073928	0.729559	6.28289	2.65143	up
GO:0045087	innate immune response	biological_process	5	0.536479	ENSSSCG00000021383	CGAS	cyclic GMP-AMP synthase [Source:NCBI gene;Acc:100516408]	0.211824	0.107048	0	0.176027	0.675164	0.29819	0.213437	0.677419	0.265474	-1.91336	down
GO:0030198	extracellular matrix organization	biological_process	6	0.536479	ENSSSCG00000014988	MMP13	matrix metallopeptidase 13 [Source:NCBI gene;Acc:397346]	4.41573	0.779192	2.73243	0.822949	1.12681	0.478646	0.65519	0.178644	3.58723	1.84287	up
GO:0008233	peptidase activity	molecular_function	5	0.537813	ENSSSCG00000014988	MMP13	matrix metallopeptidase 13 [Source:NCBI gene;Acc:397346]	4.41573	0.779192	2.73243	0.822949	1.12681	0.478646	0.65519	0.178644	3.58723	1.84287	up
GO:0008233	peptidase activity	molecular_function	5	0.537813	ENSSSCG00000034746	CAPN8	calpain 8 [Source:NCBI gene;Acc:100625563]	0	0	0	0	0	0.211644	0.0716674	0.528428	0.000492769	-10.9868	down
GO:0008237	metallopeptidase activity	molecular_function	7	0.548756	ENSSSCG00000014988	MMP13	matrix metallopeptidase 13 [Source:NCBI gene;Acc:397346]	4.41573	0.779192	2.73243	0.822949	1.12681	0.478646	0.65519	0.178644	3.58723	1.84287	up
GO:0005794	Golgi apparatus	cellular_component	6	0.55225	ENSSSCG00000004646	ATP8B4	ATPase phospholipid transporting 8B4 (putative) [Source:NCBI gene;Acc:100154720]	0.0615731	0.45834	0.231173	1.22783	0.154983	0.170382	0.0929394	0.217412	3.11289	1.63825	up
GO:0005794	Golgi apparatus	cellular_component	6	0.55225	ENSSSCG00000007728	ENSSSCG00000007728		0.342202	0.29118	0	0.350267	0	0	0	0	2459.12	11.2639	up
GO:0005794	Golgi apparatus	cellular_component	6	0.55225	ENSSSCG00000010009	GAL3ST1	galactose-3-O-sulfotransferase 1 [Source:NCBI gene;Acc:100155265]	0.0467954	0.0789851	0.115817	0.0450968	0.186846	0.185555	0.188765	0.104908	0.430424	-1.21617	down
GO:0005794	Golgi apparatus	cellular_component	6	0.55225	ENSSSCG00000035421	ATP8A2	phospholipid-transporting ATPase IB [Source:NCBI gene;Acc:100523747]	0	0	0	0	0	0.106941	0	0	0.00374038	-8.0626	down
GO:0005794	Golgi apparatus	cellular_component	6	0.55225	ENSSSCG00000040746	LRP2	LDL receptor related protein 2 [Source:NCBI gene;Acc:100519689]	0.295167	0.701586	0.542765	0.959293	0.184023	0.427094	0.234247	0.380174	2.03895	1.02783	up
GO:0003729	mRNA binding	molecular_function	7	0.560711	ENSSSCG00000008994	RBM46	RNA binding motif protein 46 [Source:NCBI gene;Acc:100513804]	0.226085	0.477236	0.25283	0.359355	0.129895	0.171487	0.142992	0.128662	2.29567	1.19892	up
GO:0055114	oxidation-reduction process	biological_process	4	0.569043	ENSSSCG00000008522	XDH	xanthine dehydrogenase [Source:NCBI gene;Acc:100515259]	0.252166	0.115657	0.157807	0.298556	0.0307525	0.0547913	0.0339726	0.0307205	5.48591	2.45573	up
GO:0055114	oxidation-reduction process	biological_process	4	0.569043	ENSSSCG00000017980	ALOX12B	arachidonate 12-lipoxygenase, 12R type [Source:NCBI gene;Acc:100526246]	0	0	0	0.023422	0.112108	0.169971	0.046735	0.163495	0.0475758	-4.39363	down
GO:0055114	oxidation-reduction process	biological_process	4	0.569043	ENSSSCG00000026349	ALDH3B2	aldehyde dehydrogenase family 3 member B2-like [Source:NCBI gene;Acc:100522421]	0	0	0	0	0.070135	0	0	0.366194	0.000916739	-10.0912	down
GO:0055114	oxidation-reduction process	biological_process	4	0.569043	ENSSSCG00000040317	SOD2	superoxide dismutase 2 [Source:NCBI gene;Acc:100154319]	440.443	811.833	177.56	447.583	341.528	313.897	96.7074	127.848	2.13348	1.09321	up
GO:0014069	postsynaptic density	cellular_component	5	0.578057	ENSSSCG00000027654	NETO1	neuropilin and tolloid like 1 [Source:NCBI gene;Acc:100622872]	0.00786498	0.036241	0.0440407	0.0587965	0	0	0	0	367.358	8.52104	up
GO:0005789	endoplasmic reticulum membrane	cellular_component	5	0.595259	ENSSSCG00000016247	TM4SF20	transmembrane 4 L six family member 20 [Source:NCBI gene;Acc:100513630]	0.45096	0.388991	0.206182	0.350654	0.064814	0.204073	0.141277	0.062815	2.95317	1.56226	up
GO:0005789	endoplasmic reticulum membrane	cellular_component	5	0.595259	ENSSSCG00000034163	PLN	phospholamban [Source:NCBI gene;Acc:397421]	1.31763	0.663593	1.79408	2.5748	6.43865	2.88279	3.72296	8.02146	0.301441	-1.73005	down
GO:0008283	cell population proliferation	biological_process	3	0.597438	ENSSSCG00000040746	LRP2	LDL receptor related protein 2 [Source:NCBI gene;Acc:100519689]	0.295167	0.701586	0.542765	0.959293	0.184023	0.427094	0.234247	0.380174	2.03895	1.02783	up
GO:0070374	positive regulation of ERK1 and ERK2 cascade	biological_process	12	0.597438	ENSSSCG00000037358	ENSSSCG00000037358	serum amyloid A-3 protein [Source:NCBI gene;Acc:733603]	16.2985	26.5234	0.799804	11.4058	5.65267	2.30216	0.073928	0.729559	6.28289	2.65143	up
GO:0042127	regulation of cell population proliferation	biological_process	6	0.600133	ENSSSCG00000003386	TNFRSF9	TNF receptor superfamily member 9 [Source:NCBI gene;Acc:100519368]	0.0695877	0.12297	0.188732	0.130953	0.288478	0.336174	0.185547	0.284585	0.467894	-1.09575	down
GO:0034220	ion transmembrane transport	biological_process	7	0.602811	ENSSSCG00000009735	P2RX2	purinergic receptor P2X 2 [Source:NCBI gene;Acc:100736581]	0	0.124022	0.170384	0.0845002	0	0	0	0	947.265	9.88762	up
GO:0043066	negative regulation of apoptotic process	biological_process	9	0.60966	ENSSSCG00000008742	CD38	CD38 molecule [Source:NCBI gene;Acc:100511702]	3.70184	3.39609	0.812398	2.31241	1.78349	1.58737	0.572801	0.953064	2.08767	1.06189	up
GO:0043066	negative regulation of apoptotic process	biological_process	9	0.60966	ENSSSCG00000020970	IL6	interleukin 6 [Source:NCBI gene;Acc:399500]	2.51923	2.82316	4.87588	5.13129	5.23923	6.45856	9.15744	20.8768	0.367813	-1.44296	down
GO:0022857	transmembrane transporter activity	molecular_function	4	0.615936	ENSSSCG00000032113	ENSSSCG00000032113	cationic amino acid transporter 3-like [Source:NCBI gene;Acc:100523440]	0	0	0	0	0.016327	0.0105538	0.0168877	0	0.00913901	-6.77375	down
GO:0005975	carbohydrate metabolic process	biological_process	5	0.626126	ENSSSCG00000011735	SI	sucrase-isomaltase [Source:NCBI gene;Acc:100623884]	0	0	0.126363	0	0	0	0	0	315.907	8.30336	up
GO:0051260	protein homooligomerization	biological_process	8	0.63112	ENSSSCG00000009735	P2RX2	purinergic receptor P2X 2 [Source:NCBI gene;Acc:100736581]	0	0.124022	0.170384	0.0845002	0	0	0	0	947.265	9.88762	up
GO:0045893	positive regulation of transcription, DNA-templated	biological_process	9	0.634601	ENSSSCG00000008742	CD38	CD38 molecule [Source:NCBI gene;Acc:100511702]	3.70184	3.39609	0.812398	2.31241	1.78349	1.58737	0.572801	0.953064	2.08767	1.06189	up
GO:0045893	positive regulation of transcription, DNA-templated	biological_process	9	0.634601	ENSSSCG00000020970	IL6	interleukin 6 [Source:NCBI gene;Acc:399500]	2.51923	2.82316	4.87588	5.13129	5.23923	6.45856	9.15744	20.8768	0.367813	-1.44296	down
GO:0045893	positive regulation of transcription, DNA-templated	biological_process	9	0.634601	ENSSSCG00000031080	HAND1	heart and neural crest derivatives expressed 1 [Source:NCBI gene;Acc:541594]	0.012135	0.076182	0	0.013521	0	0	0	0	254.595	7.99206	up
GO:0060271	cilium assembly	biological_process	7	0.638487	ENSSSCG00000004540	ONECUT2	one cut homeobox 2 [Source:NCBI gene;Acc:106507181]	0	0	0	0	0	0.043783	0.033285	0.013458	0.00441862	-7.82219	down
GO:0005743	mitochondrial inner membrane	cellular_component	6	0.645709	ENSSSCG00000035727	SURF1	surfeit locus protein 1 [Source:NCBI gene;Acc:110256505]	0.794258	1.0833	1.13023	0.666506	1.04102	2.86432	6.53336	7.01648	0.210499	-2.24811	down
GO:0016477	cell migration	biological_process	6	0.648084	ENSSSCG00000000257	ITGB7	integrin subunit beta 7 [Source:NCBI gene;Acc:397221]	0.185201	0.227381	0.35861	0.515071	0.180725	0.12515	0.146028	0.18352	2.02426	1.01739	up
GO:0043565	sequence-specific DNA binding	molecular_function	7	0.649593	ENSSSCG00000002658	FOXL1	forkhead box L1 [Source:NCBI gene;Acc:100511634]	1.09758	0.23386	0.197345	0.099179	0.024694	0	0.053966	0.20144	5.81208	2.53905	up
GO:0043565	sequence-specific DNA binding	molecular_function	7	0.649593	ENSSSCG00000031080	HAND1	heart and neural crest derivatives expressed 1 [Source:NCBI gene;Acc:541594]	0.012135	0.076182	0	0.013521	0	0	0	0	254.595	7.99206	up
GO:0043565	sequence-specific DNA binding	molecular_function	7	0.649593	ENSSSCG00000036741	ENSSSCG00000036741	paired like homeodomain 1 [Source:NCBI gene;Acc:100689266]	0	0	0.0115265	0	0.0500546	0	0.057267	0.119003	0.0509293	-4.29536	down
GO:0006281	DNA repair	biological_process	8	0.659726	ENSSSCG00000021383	CGAS	cyclic GMP-AMP synthase [Source:NCBI gene;Acc:100516408]	0.211824	0.107048	0	0.176027	0.675164	0.29819	0.213437	0.677419	0.265474	-1.91336	down
GO:0051015	actin filament binding	molecular_function	7	0.666527	ENSSSCG00000015073	TAGLN	transgelin [Source:NCBI gene;Acc:397021]	17.3491	6.88576	6.78187	6.85828	44.7031	6.08871	8.11511	33.415	0.41025	-1.28543	down
GO:0007283	spermatogenesis	biological_process	7	0.675386	ENSSSCG00000010009	GAL3ST1	galactose-3-O-sulfotransferase 1 [Source:NCBI gene;Acc:100155265]	0.0467954	0.0789851	0.115817	0.0450968	0.186846	0.185555	0.188765	0.104908	0.430424	-1.21617	down
GO:0001227	DNA-binding transcription repressor activity, RNA polymerase II-specific	molecular_function	6	0.681877	ENSSSCG00000031080	HAND1	heart and neural crest derivatives expressed 1 [Source:NCBI gene;Acc:541594]	0.012135	0.076182	0	0.013521	0	0	0	0	254.595	7.99206	up
GO:0046982	protein heterodimerization activity	molecular_function	6	0.681984	ENSSSCG00000014895	ENSSSCG00000014895		0.447294	2.77269	1.13723	1.15876	0	0.512435	0.137954	0.229386	6.26975	2.64841	up
GO:0046982	protein heterodimerization activity	molecular_function	6	0.681984	ENSSSCG00000031080	HAND1	heart and neural crest derivatives expressed 1 [Source:NCBI gene;Acc:541594]	0.012135	0.076182	0	0.013521	0	0	0	0	254.595	7.99206	up
GO:0016301	kinase activity	molecular_function	6	0.683495	ENSSSCG00000012137	BMX	BMX non-receptor tyrosine kinase [Source:NCBI gene;Acc:100516528]	0.470346	0.451285	0.546133	1.00719	1.1298	0.604344	0.774901	3.02998	0.446821	-1.16223	down
GO:0016301	kinase activity	molecular_function	6	0.683495	ENSSSCG00000024492	EPHB1	EPH receptor B1 [Source:NCBI gene;Acc:100524585]	0.040072	0.135855	0.125182	0.079682	0.16303	0.106112	0.412634	0.215447	0.424411	-1.23647	down
GO:0030335	positive regulation of cell migration	biological_process	8	0.686133	ENSSSCG00000004540	ONECUT2	one cut homeobox 2 [Source:NCBI gene;Acc:106507181]	0	0	0	0	0	0.043783	0.033285	0.013458	0.00441862	-7.82219	down
GO:0006357	regulation of transcription by RNA polymerase II	biological_process	9	0.689479	ENSSSCG00000002658	FOXL1	forkhead box L1 [Source:NCBI gene;Acc:100511634]	1.09758	0.23386	0.197345	0.099179	0.024694	0	0.053966	0.20144	5.81208	2.53905	up
GO:0006357	regulation of transcription by RNA polymerase II	biological_process	9	0.689479	ENSSSCG00000040317	SOD2	superoxide dismutase 2 [Source:NCBI gene;Acc:100154319]	440.443	811.833	177.56	447.583	341.528	313.897	96.7074	127.848	2.13348	1.09321	up
GO:0001701	in utero embryonic development	biological_process	8	0.692411	ENSSSCG00000031080	HAND1	heart and neural crest derivatives expressed 1 [Source:NCBI gene;Acc:541594]	0.012135	0.076182	0	0.013521	0	0	0	0	254.595	7.99206	up
GO:0016310	phosphorylation	biological_process	7	0.704037	ENSSSCG00000012137	BMX	BMX non-receptor tyrosine kinase [Source:NCBI gene;Acc:100516528]	0.470346	0.451285	0.546133	1.00719	1.1298	0.604344	0.774901	3.02998	0.446821	-1.16223	down
GO:0016310	phosphorylation	biological_process	7	0.704037	ENSSSCG00000024492	EPHB1	EPH receptor B1 [Source:NCBI gene;Acc:100524585]	0.040072	0.135855	0.125182	0.079682	0.16303	0.106112	0.412634	0.215447	0.424411	-1.23647	down
GO:0000978	RNA polymerase II proximal promoter sequence-specific DNA binding	molecular_function	10	0.715277	ENSSSCG00000004540	ONECUT2	one cut homeobox 2 [Source:NCBI gene;Acc:106507181]	0	0	0	0	0	0.043783	0.033285	0.013458	0.00441862	-7.82219	down
GO:0000978	RNA polymerase II proximal promoter sequence-specific DNA binding	molecular_function	10	0.715277	ENSSSCG00000031080	HAND1	heart and neural crest derivatives expressed 1 [Source:NCBI gene;Acc:541594]	0.012135	0.076182	0	0.013521	0	0	0	0	254.595	7.99206	up
GO:0044212	transcription regulatory region DNA binding	molecular_function	7	0.716302	ENSSSCG00000031080	HAND1	heart and neural crest derivatives expressed 1 [Source:NCBI gene;Acc:541594]	0.012135	0.076182	0	0.013521	0	0	0	0	254.595	7.99206	up
GO:0015031	protein transport	biological_process	9	0.720101	ENSSSCG00000040683	ENSSSCG00000040683		0	0	0	0	0.573955	0	0.190963	0.165093	0.000430102	-11.183	down
GO:0016887	ATPase activity	molecular_function	9	0.721982	ENSSSCG00000001401	ENSSSCG00000001401	ATPase H+ transporting V1 subunit G2 [Source:NCBI gene;Acc:100152358]	0.076847	0.137269	0.14906	0.045167	0.263849	0.368966	0.395026	0.27871	0.312535	-1.67791	down
GO:0016787	hydrolase activity	molecular_function	4	0.7281	ENSSSCG00000014988	MMP13	matrix metallopeptidase 13 [Source:NCBI gene;Acc:397346]	4.41573	0.779192	2.73243	0.822949	1.12681	0.478646	0.65519	0.178644	3.58723	1.84287	up
GO:0016787	hydrolase activity	molecular_function	4	0.7281	ENSSSCG00000023924	PDE1A	phosphodiesterase 1A [Source:NCBI gene;Acc:100152819]	0.184694	0.157517	0.102583	0.207681	0.415303	0.123247	0.136439	0.959707	0.399142	-1.32503	down
GO:0016787	hydrolase activity	molecular_function	4	0.7281	ENSSSCG00000034746	CAPN8	calpain 8 [Source:NCBI gene;Acc:100625563]	0	0	0	0	0	0.211644	0.0716674	0.528428	0.000492769	-10.9868	down
GO:0016787	hydrolase activity	molecular_function	4	0.7281	ENSSSCG00000034919	GDA	guanine deaminase [Source:NCBI gene;Acc:100621043]	0	0.044769	0.063896	0.072535	0	0	0	0.009402	19.2725	4.26847	up
GO:0005783	endoplasmic reticulum	cellular_component	6	0.732991	ENSSSCG00000011110	CCDC3	coiled-coil domain-containing protein 3 [Source:NCBI gene;Acc:100510975]	2.75071	0.930901	0.982636	0.802897	8.75776	1.4694	0.913093	5.07058	0.337253	-1.5681	down
GO:0005783	endoplasmic reticulum	cellular_component	6	0.732991	ENSSSCG00000024492	EPHB1	EPH receptor B1 [Source:NCBI gene;Acc:100524585]	0.040072	0.135855	0.125182	0.079682	0.16303	0.106112	0.412634	0.215447	0.424411	-1.23647	down
GO:0005783	endoplasmic reticulum	cellular_component	6	0.732991	ENSSSCG00000034163	PLN	phospholamban [Source:NCBI gene;Acc:397421]	1.31763	0.663593	1.79408	2.5748	6.43865	2.88279	3.72296	8.02146	0.301441	-1.73005	down
GO:0005783	endoplasmic reticulum	cellular_component	6	0.732991	ENSSSCG00000040746	LRP2	LDL receptor related protein 2 [Source:NCBI gene;Acc:100519689]	0.295167	0.701586	0.542765	0.959293	0.184023	0.427094	0.234247	0.380174	2.03895	1.02783	up
GO:0003824	catalytic activity	molecular_function	3	0.736693	ENSSSCG00000011735	SI	sucrase-isomaltase [Source:NCBI gene;Acc:100623884]	0	0	0.126363	0	0	0	0	0	315.907	8.30336	up
GO:0003824	catalytic activity	molecular_function	3	0.736693	ENSSSCG00000017980	ALOX12B	arachidonate 12-lipoxygenase, 12R type [Source:NCBI gene;Acc:100526246]	0	0	0	0.023422	0.112108	0.169971	0.046735	0.163495	0.0475758	-4.39363	down
GO:0003723	RNA binding	molecular_function	6	0.746618	ENSSSCG00000008994	RBM46	RNA binding motif protein 46 [Source:NCBI gene;Acc:100513804]	0.226085	0.477236	0.25283	0.359355	0.129895	0.171487	0.142992	0.128662	2.29567	1.19892	up
GO:0003723	RNA binding	molecular_function	6	0.746618	ENSSSCG00000014052	EIF4E1B	eukaryotic translation initiation factor 4E family member 1B [Source:NCBI gene;Acc:100523233]	0.188853	0	0.057771	0.658422	0	0	0.033915	0.007078	22.0781	4.46454	up
GO:0003723	RNA binding	molecular_function	6	0.746618	ENSSSCG00000036156	RBM12	RNA binding motif protein 12 [Source:NCBI gene;Acc:100157350]	9.56089	0	8.26496	5.5418	0	0	0	0	58419.1	15.8342	up
GO:0042803	protein homodimerization activity	molecular_function	6	0.760038	ENSSSCG00000008522	XDH	xanthine dehydrogenase [Source:NCBI gene;Acc:100515259]	0.252166	0.115657	0.157807	0.298556	0.0307525	0.0547913	0.0339726	0.0307205	5.48591	2.45573	up
GO:0042803	protein homodimerization activity	molecular_function	6	0.760038	ENSSSCG00000014895	ENSSSCG00000014895		0.447294	2.77269	1.13723	1.15876	0	0.512435	0.137954	0.229386	6.26975	2.64841	up
GO:0042803	protein homodimerization activity	molecular_function	6	0.760038	ENSSSCG00000031080	HAND1	heart and neural crest derivatives expressed 1 [Source:NCBI gene;Acc:541594]	0.012135	0.076182	0	0.013521	0	0	0	0	254.595	7.99206	up
GO:0005623	cell	cellular_component	3	0.763544	ENSSSCG00000001844	PLIN1	perilipin 1 [Source:NCBI gene;Acc:654411]	0.0876927	0	0.0253353	0.169325	0	0	0	0	705.882	9.46328	up
GO:0008270	zinc ion binding	molecular_function	8	0.788844	ENSSSCG00000007964	ENSSSCG00000007964	MEFV, pyrin innate immunity regulator [Source:NCBI gene;Acc:100517333]	0.506142	0.41965	0.203777	0.837334	0.18061	0.282563	0.186357	0.178046	2.3767	1.24896	up
GO:0008270	zinc ion binding	molecular_function	8	0.788844	ENSSSCG00000014988	MMP13	matrix metallopeptidase 13 [Source:NCBI gene;Acc:397346]	4.41573	0.779192	2.73243	0.822949	1.12681	0.478646	0.65519	0.178644	3.58723	1.84287	up
GO:0008270	zinc ion binding	molecular_function	8	0.788844	ENSSSCG00000034919	GDA	guanine deaminase [Source:NCBI gene;Acc:100621043]	0	0.044769	0.063896	0.072535	0	0	0	0.009402	19.2725	4.26847	up
GO:0046872	metal ion binding	molecular_function	6	0.791952	ENSSSCG00000004340	FHL5	four and a half LIM domains 5 [Source:NCBI gene;Acc:100152075]	0.865883	0.935866	0.776209	0.780599	3.28804	1.25704	0.754613	4.07008	0.358446	-1.48017	down
GO:0046872	metal ion binding	molecular_function	6	0.791952	ENSSSCG00000008522	XDH	xanthine dehydrogenase [Source:NCBI gene;Acc:100515259]	0.252166	0.115657	0.157807	0.298556	0.0307525	0.0547913	0.0339726	0.0307205	5.48591	2.45573	up
GO:0046872	metal ion binding	molecular_function	6	0.791952	ENSSSCG00000010325	KCNMA1	potassium calcium-activated channel subfamily M alpha 1 [Source:NCBI gene;Acc:397434]	0.11953	0.0259335	0.020903	0.0945038	0.585101	0.119901	0.110312	0.14883	0.270572	-1.88592	down
GO:0046872	metal ion binding	molecular_function	6	0.791952	ENSSSCG00000014988	MMP13	matrix metallopeptidase 13 [Source:NCBI gene;Acc:397346]	4.41573	0.779192	2.73243	0.822949	1.12681	0.478646	0.65519	0.178644	3.58723	1.84287	up
GO:0046872	metal ion binding	molecular_function	6	0.791952	ENSSSCG00000017980	ALOX12B	arachidonate 12-lipoxygenase, 12R type [Source:NCBI gene;Acc:100526246]	0	0	0	0.023422	0.112108	0.169971	0.046735	0.163495	0.0475758	-4.39363	down
GO:0046872	metal ion binding	molecular_function	6	0.791952	ENSSSCG00000021383	CGAS	cyclic GMP-AMP synthase [Source:NCBI gene;Acc:100516408]	0.211824	0.107048	0	0.176027	0.675164	0.29819	0.213437	0.677419	0.265474	-1.91336	down
GO:0046872	metal ion binding	molecular_function	6	0.791952	ENSSSCG00000023924	PDE1A	phosphodiesterase 1A [Source:NCBI gene;Acc:100152819]	0.184694	0.157517	0.102583	0.207681	0.415303	0.123247	0.136439	0.959707	0.399142	-1.32503	down
GO:0046872	metal ion binding	molecular_function	6	0.791952	ENSSSCG00000040317	SOD2	superoxide dismutase 2 [Source:NCBI gene;Acc:100154319]	440.443	811.833	177.56	447.583	341.528	313.897	96.7074	127.848	2.13348	1.09321	up
GO:0006974	cellular response to DNA damage stimulus	biological_process	6	0.792029	ENSSSCG00000021383	CGAS	cyclic GMP-AMP synthase [Source:NCBI gene;Acc:100516408]	0.211824	0.107048	0	0.176027	0.675164	0.29819	0.213437	0.677419	0.265474	-1.91336	down
GO:0003700	DNA-binding transcription factor activity	molecular_function	4	0.795144	ENSSSCG00000002658	FOXL1	forkhead box L1 [Source:NCBI gene;Acc:100511634]	1.09758	0.23386	0.197345	0.099179	0.024694	0	0.053966	0.20144	5.81208	2.53905	up
GO:0003700	DNA-binding transcription factor activity	molecular_function	4	0.795144	ENSSSCG00000004540	ONECUT2	one cut homeobox 2 [Source:NCBI gene;Acc:106507181]	0	0	0	0	0	0.043783	0.033285	0.013458	0.00441862	-7.82219	down
GO:0003700	DNA-binding transcription factor activity	molecular_function	4	0.795144	ENSSSCG00000036741	ENSSSCG00000036741	paired like homeodomain 1 [Source:NCBI gene;Acc:100689266]	0	0	0.0115265	0	0.0500546	0	0.057267	0.119003	0.0509293	-4.29536	down
GO:0006508	proteolysis	biological_process	7	0.808225	ENSSSCG00000014988	MMP13	matrix metallopeptidase 13 [Source:NCBI gene;Acc:397346]	4.41573	0.779192	2.73243	0.822949	1.12681	0.478646	0.65519	0.178644	3.58723	1.84287	up
GO:0006508	proteolysis	biological_process	7	0.808225	ENSSSCG00000034746	CAPN8	calpain 8 [Source:NCBI gene;Acc:100625563]	0	0	0	0	0	0.211644	0.0716674	0.528428	0.000492769	-10.9868	down
GO:0019899	enzyme binding	molecular_function	5	0.812092	ENSSSCG00000031080	HAND1	heart and neural crest derivatives expressed 1 [Source:NCBI gene;Acc:541594]	0.012135	0.076182	0	0.013521	0	0	0	0	254.595	7.99206	up
GO:0008285	negative regulation of cell population proliferation	biological_process	7	0.812092	ENSSSCG00000003386	TNFRSF9	TNF receptor superfamily member 9 [Source:NCBI gene;Acc:100519368]	0.0695877	0.12297	0.188732	0.130953	0.288478	0.336174	0.185547	0.284585	0.467894	-1.09575	down
GO:0045202	synapse	cellular_component	3	0.818344	ENSSSCG00000027654	NETO1	neuropilin and tolloid like 1 [Source:NCBI gene;Acc:100622872]	0.00786498	0.036241	0.0440407	0.0587965	0	0	0	0	367.358	8.52104	up
GO:0008134	transcription factor binding	molecular_function	5	0.826752	ENSSSCG00000031080	HAND1	heart and neural crest derivatives expressed 1 [Source:NCBI gene;Acc:541594]	0.012135	0.076182	0	0.013521	0	0	0	0	254.595	7.99206	up
GO:0045944	positive regulation of transcription by RNA polymerase II	biological_process	10	0.858673	ENSSSCG00000004340	FHL5	four and a half LIM domains 5 [Source:NCBI gene;Acc:100152075]	0.865883	0.935866	0.776209	0.780599	3.28804	1.25704	0.754613	4.07008	0.358446	-1.48017	down
GO:0045944	positive regulation of transcription by RNA polymerase II	biological_process	10	0.858673	ENSSSCG00000004540	ONECUT2	one cut homeobox 2 [Source:NCBI gene;Acc:106507181]	0	0	0	0	0	0.043783	0.033285	0.013458	0.00441862	-7.82219	down
GO:0045944	positive regulation of transcription by RNA polymerase II	biological_process	10	0.858673	ENSSSCG00000020970	IL6	interleukin 6 [Source:NCBI gene;Acc:399500]	2.51923	2.82316	4.87588	5.13129	5.23923	6.45856	9.15744	20.8768	0.367813	-1.44296	down
GO:0045944	positive regulation of transcription by RNA polymerase II	biological_process	10	0.858673	ENSSSCG00000031080	HAND1	heart and neural crest derivatives expressed 1 [Source:NCBI gene;Acc:541594]	0.012135	0.076182	0	0.013521	0	0	0	0	254.595	7.99206	up
GO:0004672	protein kinase activity	molecular_function	7	0.859857	ENSSSCG00000012137	BMX	BMX non-receptor tyrosine kinase [Source:NCBI gene;Acc:100516528]	0.470346	0.451285	0.546133	1.00719	1.1298	0.604344	0.774901	3.02998	0.446821	-1.16223	down
GO:0004672	protein kinase activity	molecular_function	7	0.859857	ENSSSCG00000024492	EPHB1	EPH receptor B1 [Source:NCBI gene;Acc:100524585]	0.040072	0.135855	0.125182	0.079682	0.16303	0.106112	0.412634	0.215447	0.424411	-1.23647	down
GO:0003677	DNA binding	molecular_function	6	0.871707	ENSSSCG00000002658	FOXL1	forkhead box L1 [Source:NCBI gene;Acc:100511634]	1.09758	0.23386	0.197345	0.099179	0.024694	0	0.053966	0.20144	5.81208	2.53905	up
GO:0003677	DNA binding	molecular_function	6	0.871707	ENSSSCG00000004540	ONECUT2	one cut homeobox 2 [Source:NCBI gene;Acc:106507181]	0	0	0	0	0	0.043783	0.033285	0.013458	0.00441862	-7.82219	down
GO:0003677	DNA binding	molecular_function	6	0.871707	ENSSSCG00000021383	CGAS	cyclic GMP-AMP synthase [Source:NCBI gene;Acc:100516408]	0.211824	0.107048	0	0.176027	0.675164	0.29819	0.213437	0.677419	0.265474	-1.91336	down
GO:0003677	DNA binding	molecular_function	6	0.871707	ENSSSCG00000031080	HAND1	heart and neural crest derivatives expressed 1 [Source:NCBI gene;Acc:541594]	0.012135	0.076182	0	0.013521	0	0	0	0	254.595	7.99206	up
GO:0003677	DNA binding	molecular_function	6	0.871707	ENSSSCG00000036741	ENSSSCG00000036741	paired like homeodomain 1 [Source:NCBI gene;Acc:100689266]	0	0	0.0115265	0	0.0500546	0	0.057267	0.119003	0.0509293	-4.29536	down
GO:0001228	DNA-binding transcription activator activity, RNA polymerase II-specific	molecular_function	6	0.874036	ENSSSCG00000004540	ONECUT2	one cut homeobox 2 [Source:NCBI gene;Acc:106507181]	0	0	0	0	0	0.043783	0.033285	0.013458	0.00441862	-7.82219	down
GO:0006412	translation	biological_process	8	0.887777	ENSSSCG00000014052	EIF4E1B	eukaryotic translation initiation factor 4E family member 1B [Source:NCBI gene;Acc:100523233]	0.188853	0	0.057771	0.658422	0	0	0.033915	0.007078	22.0781	4.46454	up
GO:0008284	positive regulation of cell population proliferation	biological_process	7	0.888538	ENSSSCG00000020970	IL6	interleukin 6 [Source:NCBI gene;Acc:399500]	2.51923	2.82316	4.87588	5.13129	5.23923	6.45856	9.15744	20.8768	0.367813	-1.44296	down
GO:0003682	chromatin binding	molecular_function	4	0.895867	ENSSSCG00000021383	CGAS	cyclic GMP-AMP synthase [Source:NCBI gene;Acc:100516408]	0.211824	0.107048	0	0.176027	0.675164	0.29819	0.213437	0.677419	0.265474	-1.91336	down
GO:0042802	identical protein binding	molecular_function	5	0.898233	ENSSSCG00000009735	P2RX2	purinergic receptor P2X 2 [Source:NCBI gene;Acc:100736581]	0	0.124022	0.170384	0.0845002	0	0	0	0	947.265	9.88762	up
GO:0042802	identical protein binding	molecular_function	5	0.898233	ENSSSCG00000015636	VSTM2A	V-set and transmembrane domain containing 2A [Source:NCBI gene;Acc:100517233]	0	0	0	0	0.259666	0	0	0	0.00154044	-9.34244	down
GO:0042802	identical protein binding	molecular_function	5	0.898233	ENSSSCG00000031080	HAND1	heart and neural crest derivatives expressed 1 [Source:NCBI gene;Acc:541594]	0.012135	0.076182	0	0.013521	0	0	0	0	254.595	7.99206	up
GO:0019901	protein kinase binding	molecular_function	7	0.898663	ENSSSCG00000003191	TSKS	testis specific serine kinase substrate [Source:NCBI gene;Acc:100522079]	0	0	0	0	0.090648	0	0.098386	0.048463	0.00168423	-9.21369	down
GO:0005730	nucleolus	cellular_component	6	0.900774	ENSSSCG00000003737	NOL4	nucleolar protein 4 [Source:NCBI gene;Acc:100518847]	0.0843708	0.123935	0.0492241	0.144966	0	0.0160961	0.0300023	0.0375618	4.81108	2.26636	up
GO:0005730	nucleolus	cellular_component	6	0.900774	ENSSSCG00000031080	HAND1	heart and neural crest derivatives expressed 1 [Source:NCBI gene;Acc:541594]	0.012135	0.076182	0	0.013521	0	0	0	0	254.595	7.99206	up
GO:0035556	intracellular signal transduction	biological_process	5	0.902053	ENSSSCG00000012137	BMX	BMX non-receptor tyrosine kinase [Source:NCBI gene;Acc:100516528]	0.470346	0.451285	0.546133	1.00719	1.1298	0.604344	0.774901	3.02998	0.446821	-1.16223	down
GO:0006468	protein phosphorylation	biological_process	9	0.902391	ENSSSCG00000012137	BMX	BMX non-receptor tyrosine kinase [Source:NCBI gene;Acc:100516528]	0.470346	0.451285	0.546133	1.00719	1.1298	0.604344	0.774901	3.02998	0.446821	-1.16223	down
GO:0006468	protein phosphorylation	biological_process	9	0.902391	ENSSSCG00000024492	EPHB1	EPH receptor B1 [Source:NCBI gene;Acc:100524585]	0.040072	0.135855	0.125182	0.079682	0.16303	0.106112	0.412634	0.215447	0.424411	-1.23647	down
GO:0016740	transferase activity	molecular_function	4	0.908016	ENSSSCG00000012137	BMX	BMX non-receptor tyrosine kinase [Source:NCBI gene;Acc:100516528]	0.470346	0.451285	0.546133	1.00719	1.1298	0.604344	0.774901	3.02998	0.446821	-1.16223	down
GO:0016740	transferase activity	molecular_function	4	0.908016	ENSSSCG00000021383	CGAS	cyclic GMP-AMP synthase [Source:NCBI gene;Acc:100516408]	0.211824	0.107048	0	0.176027	0.675164	0.29819	0.213437	0.677419	0.265474	-1.91336	down
GO:0016740	transferase activity	molecular_function	4	0.908016	ENSSSCG00000024492	EPHB1	EPH receptor B1 [Source:NCBI gene;Acc:100524585]	0.040072	0.135855	0.125182	0.079682	0.16303	0.106112	0.412634	0.215447	0.424411	-1.23647	down
GO:0007165	signal transduction	biological_process	4	0.927286	ENSSSCG00000012137	BMX	BMX non-receptor tyrosine kinase [Source:NCBI gene;Acc:100516528]	0.470346	0.451285	0.546133	1.00719	1.1298	0.604344	0.774901	3.02998	0.446821	-1.16223	down
GO:0007165	signal transduction	biological_process	4	0.927286	ENSSSCG00000014895	ENSSSCG00000014895		0.447294	2.77269	1.13723	1.15876	0	0.512435	0.137954	0.229386	6.26975	2.64841	up
GO:0007165	signal transduction	biological_process	4	0.927286	ENSSSCG00000023924	PDE1A	phosphodiesterase 1A [Source:NCBI gene;Acc:100152819]	0.184694	0.157517	0.102583	0.207681	0.415303	0.123247	0.136439	0.959707	0.399142	-1.32503	down
GO:0032991	protein-containing complex	cellular_component	3	0.930347	ENSSSCG00000005584	CRB2	crumbs cell polarity complex component 2 [Source:NCBI gene;Acc:100511431]	0.040431	0.018636	0.010025	0.022794	0	0	0	0.010935	8.40293	3.07089	up
GO:0005887	integral component of plasma membrane	cellular_component	6	0.937824	ENSSSCG00000009735	P2RX2	purinergic receptor P2X 2 [Source:NCBI gene;Acc:100736581]	0	0.124022	0.170384	0.0845002	0	0	0	0	947.265	9.88762	up
GO:0005887	integral component of plasma membrane	cellular_component	6	0.937824	ENSSSCG00000024492	EPHB1	EPH receptor B1 [Source:NCBI gene;Acc:100524585]	0.040072	0.135855	0.125182	0.079682	0.16303	0.106112	0.412634	0.215447	0.424411	-1.23647	down
GO:0005739	mitochondrion	cellular_component	6	0.955031	ENSSSCG00000034163	PLN	phospholamban [Source:NCBI gene;Acc:397421]	1.31763	0.663593	1.79408	2.5748	6.43865	2.88279	3.72296	8.02146	0.301441	-1.73005	down
GO:0005739	mitochondrion	cellular_component	6	0.955031	ENSSSCG00000035727	SURF1	surfeit locus protein 1 [Source:NCBI gene;Acc:110256505]	0.794258	1.0833	1.13023	0.666506	1.04102	2.86432	6.53336	7.01648	0.210499	-2.24811	down
GO:0005739	mitochondrion	cellular_component	6	0.955031	ENSSSCG00000040317	SOD2	superoxide dismutase 2 [Source:NCBI gene;Acc:100154319]	440.443	811.833	177.56	447.583	341.528	313.897	96.7074	127.848	2.13348	1.09321	up
GO:0005622	intracellular	cellular_component	4	0.971633	ENSSSCG00000034746	CAPN8	calpain 8 [Source:NCBI gene;Acc:100625563]	0	0	0	0	0	0.211644	0.0716674	0.528428	0.000492769	-10.9868	down
GO:0005654	nucleoplasm	cellular_component	6	0.973697	ENSSSCG00000004540	ONECUT2	one cut homeobox 2 [Source:NCBI gene;Acc:106507181]	0	0	0	0	0	0.043783	0.033285	0.013458	0.00441862	-7.82219	down
GO:0005654	nucleoplasm	cellular_component	6	0.973697	ENSSSCG00000012137	BMX	BMX non-receptor tyrosine kinase [Source:NCBI gene;Acc:100516528]	0.470346	0.451285	0.546133	1.00719	1.1298	0.604344	0.774901	3.02998	0.446821	-1.16223	down
GO:0005654	nucleoplasm	cellular_component	6	0.973697	ENSSSCG00000031080	HAND1	heart and neural crest derivatives expressed 1 [Source:NCBI gene;Acc:541594]	0.012135	0.076182	0	0.013521	0	0	0	0	254.595	7.99206	up
GO:0005654	nucleoplasm	cellular_component	6	0.973697	ENSSSCG00000035421	ATP8A2	phospholipid-transporting ATPase IB [Source:NCBI gene;Acc:100523747]	0	0	0	0	0	0.106941	0	0	0.00374038	-8.0626	down
GO:0005654	nucleoplasm	cellular_component	6	0.973697	ENSSSCG00000036156	RBM12	RNA binding motif protein 12 [Source:NCBI gene;Acc:100157350]	9.56089	0	8.26496	5.5418	0	0	0	0	58419.1	15.8342	up
GO:0005654	nucleoplasm	cellular_component	6	0.973697	ENSSSCG00000037457	HSPB7	heat shock protein family B (small) member 7 [Source:NCBI gene;Acc:100627988]	0.139649	0.020884	0.065506	0	1.15429	0.069848	0.043008	0.206936	0.153342	-2.70517	down
GO:0000122	negative regulation of transcription by RNA polymerase II	biological_process	10	0.984117	ENSSSCG00000031080	HAND1	heart and neural crest derivatives expressed 1 [Source:NCBI gene;Acc:541594]	0.012135	0.076182	0	0.013521	0	0	0	0	254.595	7.99206	up
GO:0006355	regulation of transcription, DNA-templated	biological_process	8	0.994572	ENSSSCG00000002658	FOXL1	forkhead box L1 [Source:NCBI gene;Acc:100511634]	1.09758	0.23386	0.197345	0.099179	0.024694	0	0.053966	0.20144	5.81208	2.53905	up
GO:0006355	regulation of transcription, DNA-templated	biological_process	8	0.994572	ENSSSCG00000036741	ENSSSCG00000036741	paired like homeodomain 1 [Source:NCBI gene;Acc:100689266]	0	0	0.0115265	0	0.0500546	0	0.057267	0.119003	0.0509293	-4.29536	down
GO:0003676	nucleic acid binding	molecular_function	5	0.996229	ENSSSCG00000008994	RBM46	RNA binding motif protein 46 [Source:NCBI gene;Acc:100513804]	0.226085	0.477236	0.25283	0.359355	0.129895	0.171487	0.142992	0.128662	2.29567	1.19892	up
GO:0003676	nucleic acid binding	molecular_function	5	0.996229	ENSSSCG00000036156	RBM12	RNA binding motif protein 12 [Source:NCBI gene;Acc:100157350]	9.56089	0	8.26496	5.5418	0	0	0	0	58419.1	15.8342	up
GO:0005737	cytoplasm	cellular_component	5	0.998067	ENSSSCG00000003483	ENSSSCG00000003483	peptidyl arginine deiminase 4 [Source:NCBI gene;Acc:100524749]	0.0307738	0	0.256222	0	0	0	0	0	717.489	9.48681	up
GO:0005737	cytoplasm	cellular_component	5	0.998067	ENSSSCG00000007964	ENSSSCG00000007964	MEFV, pyrin innate immunity regulator [Source:NCBI gene;Acc:100517333]	0.506142	0.41965	0.203777	0.837334	0.18061	0.282563	0.186357	0.178046	2.3767	1.24896	up
GO:0005737	cytoplasm	cellular_component	5	0.998067	ENSSSCG00000010103	ENSSSCG00000010103	tubulin alpha-3 chain [Source:NCBI gene;Acc:100155138]	0.107222	0.227949	0.129334	0.240343	0	0.068874	0	0.042865	6.30799	2.65718	up
GO:0005737	cytoplasm	cellular_component	5	0.998067	ENSSSCG00000014052	EIF4E1B	eukaryotic translation initiation factor 4E family member 1B [Source:NCBI gene;Acc:100523233]	0.188853	0	0.057771	0.658422	0	0	0.033915	0.007078	22.0781	4.46454	up
GO:0005737	cytoplasm	cellular_component	5	0.998067	ENSSSCG00000016022	ZNF804A	zinc finger protein 804A [Source:NCBI gene;Acc:100524346]	0.0553859	0.12664	0.189437	0.0925699	0.0276792	0.047276	0.056554	0.0325941	2.82769	1.49962	up
GO:0005737	cytoplasm	cellular_component	5	0.998067	ENSSSCG00000021383	CGAS	cyclic GMP-AMP synthase [Source:NCBI gene;Acc:100516408]	0.211824	0.107048	0	0.176027	0.675164	0.29819	0.213437	0.677419	0.265474	-1.91336	down
GO:0005737	cytoplasm	cellular_component	5	0.998067	ENSSSCG00000021645	MROH2B	maestro heat like repeat family member 2B [Source:NCBI gene;Acc:100521872]	0.031199	0.040556	0.017084	0	0	0	0	0	222.097	7.79505	up
GO:0005737	cytoplasm	cellular_component	5	0.998067	ENSSSCG00000024492	EPHB1	EPH receptor B1 [Source:NCBI gene;Acc:100524585]	0.040072	0.135855	0.125182	0.079682	0.16303	0.106112	0.412634	0.215447	0.424411	-1.23647	down
GO:0005737	cytoplasm	cellular_component	5	0.998067	ENSSSCG00000026754	ATCAY	ATCAY, caytaxin [Source:NCBI gene;Acc:100626830]	0	0	0	0	0.089454	0	0.032815	0.015637	0.00290053	-8.42947	down
GO:0005737	cytoplasm	cellular_component	5	0.998067	ENSSSCG00000029077	TUBAL3	tubulin alpha like 3 [Source:NCBI gene;Acc:100623355]	0.007797	0.03003	0.008833	0.019154	0.076438	0.038824	0.057903	0.048124	0.297412	-1.74947	down
GO:0005737	cytoplasm	cellular_component	5	0.998067	ENSSSCG00000031080	HAND1	heart and neural crest derivatives expressed 1 [Source:NCBI gene;Acc:541594]	0.012135	0.076182	0	0.013521	0	0	0	0	254.595	7.99206	up
GO:0005829	cytosol	cellular_component	6	0.999753	ENSSSCG00000001844	PLIN1	perilipin 1 [Source:NCBI gene;Acc:654411]	0.0876927	0	0.0253353	0.169325	0	0	0	0	705.882	9.46328	up
GO:0005829	cytosol	cellular_component	6	0.999753	ENSSSCG00000008522	XDH	xanthine dehydrogenase [Source:NCBI gene;Acc:100515259]	0.252166	0.115657	0.157807	0.298556	0.0307525	0.0547913	0.0339726	0.0307205	5.48591	2.45573	up
GO:0005829	cytosol	cellular_component	6	0.999753	ENSSSCG00000013865	NWD1	NACHT and WD repeat domain containing 1 [Source:NCBI gene;Acc:100737957]	0	0	0	0	0	0.0134069	0.026871	0.0161217	0.00709226	-7.13954	down
GO:0005829	cytosol	cellular_component	6	0.999753	ENSSSCG00000021383	CGAS	cyclic GMP-AMP synthase [Source:NCBI gene;Acc:100516408]	0.211824	0.107048	0	0.176027	0.675164	0.29819	0.213437	0.677419	0.265474	-1.91336	down
GO:0005829	cytosol	cellular_component	6	0.999753	ENSSSCG00000024492	EPHB1	EPH receptor B1 [Source:NCBI gene;Acc:100524585]	0.040072	0.135855	0.125182	0.079682	0.16303	0.106112	0.412634	0.215447	0.424411	-1.23647	down
GO:0005634	nucleus	cellular_component	6	0.999911	ENSSSCG00000002658	FOXL1	forkhead box L1 [Source:NCBI gene;Acc:100511634]	1.09758	0.23386	0.197345	0.099179	0.024694	0	0.053966	0.20144	5.81208	2.53905	up
GO:0005634	nucleus	cellular_component	6	0.999911	ENSSSCG00000003483	ENSSSCG00000003483	peptidyl arginine deiminase 4 [Source:NCBI gene;Acc:100524749]	0.0307738	0	0.256222	0	0	0	0	0	717.489	9.48681	up
GO:0005634	nucleus	cellular_component	6	0.999911	ENSSSCG00000004340	FHL5	four and a half LIM domains 5 [Source:NCBI gene;Acc:100152075]	0.865883	0.935866	0.776209	0.780599	3.28804	1.25704	0.754613	4.07008	0.358446	-1.48017	down
GO:0005634	nucleus	cellular_component	6	0.999911	ENSSSCG00000004540	ONECUT2	one cut homeobox 2 [Source:NCBI gene;Acc:106507181]	0	0	0	0	0	0.043783	0.033285	0.013458	0.00441862	-7.82219	down
GO:0005634	nucleus	cellular_component	6	0.999911	ENSSSCG00000004670	C15orf48	chromosome 1 C15orf48 homolog [Source:NCBI gene;Acc:100152534]	3.80373	7.49925	2.12086	2.42394	1.83959	2.25668	1.19419	1.0024	2.51838	1.3325	up
GO:0005634	nucleus	cellular_component	6	0.999911	ENSSSCG00000008994	RBM46	RNA binding motif protein 46 [Source:NCBI gene;Acc:100513804]	0.226085	0.477236	0.25283	0.359355	0.129895	0.171487	0.142992	0.128662	2.29567	1.19892	up
GO:0005634	nucleus	cellular_component	6	0.999911	ENSSSCG00000016022	ZNF804A	zinc finger protein 804A [Source:NCBI gene;Acc:100524346]	0.0553859	0.12664	0.189437	0.0925699	0.0276792	0.047276	0.056554	0.0325941	2.82769	1.49962	up
GO:0005634	nucleus	cellular_component	6	0.999911	ENSSSCG00000021383	CGAS	cyclic GMP-AMP synthase [Source:NCBI gene;Acc:100516408]	0.211824	0.107048	0	0.176027	0.675164	0.29819	0.213437	0.677419	0.265474	-1.91336	down
GO:0005634	nucleus	cellular_component	6	0.999911	ENSSSCG00000031080	HAND1	heart and neural crest derivatives expressed 1 [Source:NCBI gene;Acc:541594]	0.012135	0.076182	0	0.013521	0	0	0	0	254.595	7.99206	up
GO:0005634	nucleus	cellular_component	6	0.999911	ENSSSCG00000036741	ENSSSCG00000036741	paired like homeodomain 1 [Source:NCBI gene;Acc:100689266]	0	0	0.0115265	0	0.0500546	0	0.057267	0.119003	0.0509293	-4.29536	down
GO:0005634	nucleus	cellular_component	6	0.999911	ENSSSCG00000040683	ENSSSCG00000040683		0	0	0	0	0.573955	0	0.190963	0.165093	0.000430102	-11.183	down

## Sheet: Supplemental Table S5
Table S5: Results of KEEG enrichment analysis of differentially expressed genes significantly modulated by LPS in porcine corpus luteum
pathway_id	pathway_name	pvalue	Gene_ID	Gene_name	KO_ENTRY	EC	Description	FPKM.LPS_1	FPKM.LPS_2	FPKM.LPS_3	FPKM.LPS_4	FPKM.CTR_1	FPKM.CTR_2	FPKM.CTR_3	FPKM.CTR_4	fc	log2(fc)	regulation
ko04742	Taste transduction	0.00286461	ENSSSCG00000009735	P2RX2	K05216	NA	purinergic receptor P2X 2 [Source:NCBI gene;Acc:100736581]	0	0.124022	0.170384	0.0845002	0	0	0	0	947.265	9.88762	up
ko04742	Taste transduction	0.00286461	ENSSSCG00000013754	CACNA1A	K04344	NA	calcium voltage-gated channel subunit alpha1 A [Source:NCBI gene;Acc:100525387]	0.02133	0.00985703	0.0134541	0.0178186	0.0498397	0.0472018	0.0284099	0.0521617	0.351662	-1.50774	down
ko04742	Taste transduction	0.00286461	ENSSSCG00000023924	PDE1A	K13755	EC:3.1.4.17	phosphodiesterase 1A [Source:NCBI gene;Acc:100152819]	0.184694	0.157517	0.102583	0.207681	0.415303	0.123247	0.136439	0.959707	0.399142	-1.32503	down
ko04020	Calcium signaling pathway	0.00347527	ENSSSCG00000008742	CD38	K01242	2.4.99.20;EC:3.2.2.6	CD38 molecule [Source:NCBI gene;Acc:100511702]	3.70184	3.39609	0.812398	2.31241	1.78349	1.58737	0.572801	0.953064	2.08767	1.06189	up
ko04020	Calcium signaling pathway	0.00347527	ENSSSCG00000009735	P2RX2	K05216	NA	purinergic receptor P2X 2 [Source:NCBI gene;Acc:100736581]	0	0.124022	0.170384	0.0845002	0	0	0	0	947.265	9.88762	up
ko04020	Calcium signaling pathway	0.00347527	ENSSSCG00000013754	CACNA1A	K04344	NA	calcium voltage-gated channel subunit alpha1 A [Source:NCBI gene;Acc:100525387]	0.02133	0.00985703	0.0134541	0.0178186	0.0498397	0.0472018	0.0284099	0.0521617	0.351662	-1.50774	down
ko04020	Calcium signaling pathway	0.00347527	ENSSSCG00000023924	PDE1A	K13755	EC:3.1.4.17	phosphodiesterase 1A [Source:NCBI gene;Acc:100152819]	0.184694	0.157517	0.102583	0.207681	0.415303	0.123247	0.136439	0.959707	0.399142	-1.32503	down
ko04020	Calcium signaling pathway	0.00347527	ENSSSCG00000034163	PLN	K05852	NA	phospholamban [Source:NCBI gene;Acc:397421]	1.31763	0.663593	1.79408	2.5748	6.43865	2.88279	3.72296	8.02146	0.301441	-1.73005	down
ko04970	Salivary secretion	0.00795847	ENSSSCG00000003069	KCNN4	K04945	NA	potassium calcium-activated channel subfamily N member 4 [Source:NCBI gene;Acc:397081]	0	0	0.140078	0.105751	0	0	0	0	614.572	9.26344	up
ko04970	Salivary secretion	0.00795847	ENSSSCG00000008742	CD38	K01242	2.4.99.20;EC:3.2.2.6	CD38 molecule [Source:NCBI gene;Acc:100511702]	3.70184	3.39609	0.812398	2.31241	1.78349	1.58737	0.572801	0.953064	2.08767	1.06189	up
ko04970	Salivary secretion	0.00795847	ENSSSCG00000010325	KCNMA1	K04936	NA	potassium calcium-activated channel subfamily M alpha 1 [Source:NCBI gene;Acc:397434]	0.11953	0.0259335	0.020903	0.0945038	0.585101	0.119901	0.110312	0.14883	0.270572	-1.88592	down
ko04721	Synaptic vesicle cycle	0.010007	ENSSSCG00000001401	ENSSSCG00000001401	K02152	NA	ATPase H+ transporting V1 subunit G2 [Source:NCBI gene;Acc:100152358]	0.076847	0.137269	0.14906	0.045167	0.263849	0.368966	0.395026	0.27871	0.312535	-1.67791	down
ko04721	Synaptic vesicle cycle	0.010007	ENSSSCG00000013754	CACNA1A	K04344	NA	calcium voltage-gated channel subunit alpha1 A [Source:NCBI gene;Acc:100525387]	0.02133	0.00985703	0.0134541	0.0178186	0.0498397	0.0472018	0.0284099	0.0521617	0.351662	-1.50774	down
ko04721	Synaptic vesicle cycle	0.010007	ENSSSCG00000038946	SLC17A8	K12302	NA	solute carrier family 17 member 8 [Source:NCBI gene;Acc:100526221]	0.557141	0.599388	0.741513	0.662693	0.206377	0.366996	0.426302	0.224553	2.09171	1.06469	up
ko04060	Cytokine-cytokine receptor interaction	0.0106446	ENSSSCG00000003386	TNFRSF9	K05146	NA	TNF receptor superfamily member 9 [Source:NCBI gene;Acc:100519368]	0.0695877	0.12297	0.188732	0.130953	0.288478	0.336174	0.185547	0.284585	0.467894	-1.09575	down
ko04060	Cytokine-cytokine receptor interaction	0.0106446	ENSSSCG00000020970	IL6	K05405	NA	interleukin 6 [Source:NCBI gene;Acc:399500]	2.51923	2.82316	4.87588	5.13129	5.23923	6.45856	9.15744	20.8768	0.367813	-1.44296	down
ko04060	Cytokine-cytokine receptor interaction	0.0106446	ENSSSCG00000026695	TNFSF14	K05477	NA	TNF superfamily member 14 [Source:NCBI gene;Acc:100519468]	0.056141	0	0.20312	0.057648	0	0	0	0	792.273	9.62985	up
ko04060	Cytokine-cytokine receptor interaction	0.0106446	ENSSSCG00000039300	IL27	K22629	NA	interleukin 27 [Source:NCBI gene;Acc:493187]	0.387126	0.129744	0.126177	0.125406	0.042583	0	0	0	18.046	4.17361	up
ko04060	Cytokine-cytokine receptor interaction	0.0106446	ENSSSCG00000039721	PRL	K05439	NA	prolactin [Source:NCBI gene;Acc:396965]	0	0	0	0	0.017715	0	0.066378	0.032532	0.0034298	-8.18766	down
ko05033	Nicotine addiction	0.0155365	ENSSSCG00000013754	CACNA1A	K04344	NA	calcium voltage-gated channel subunit alpha1 A [Source:NCBI gene;Acc:100525387]	0.02133	0.00985703	0.0134541	0.0178186	0.0498397	0.0472018	0.0284099	0.0521617	0.351662	-1.50774	down
ko05033	Nicotine addiction	0.0155365	ENSSSCG00000038946	SLC17A8	K12302	NA	solute carrier family 17 member 8 [Source:NCBI gene;Acc:100526221]	0.557141	0.599388	0.741513	0.662693	0.206377	0.366996	0.426302	0.224553	2.09171	1.06469	up
ko00232	Caffeine metabolism	0.0237991	ENSSSCG00000008522	XDH	K00106	1.17.3.2;EC:1.17.1.4	xanthine dehydrogenase [Source:NCBI gene;Acc:100515259]	0.252166	0.115657	0.157807	0.298556	0.0307525	0.0547913	0.0339726	0.0307205	5.48591	2.45573	up
ko00230	Purine metabolism	0.0338954	ENSSSCG00000008522	XDH	K00106	1.17.3.2;EC:1.17.1.4	xanthine dehydrogenase [Source:NCBI gene;Acc:100515259]	0.252166	0.115657	0.157807	0.298556	0.0307525	0.0547913	0.0339726	0.0307205	5.48591	2.45573	up
ko00230	Purine metabolism	0.0338954	ENSSSCG00000023924	PDE1A	K13755	EC:3.1.4.17	phosphodiesterase 1A [Source:NCBI gene;Acc:100152819]	0.184694	0.157517	0.102583	0.207681	0.415303	0.123247	0.136439	0.959707	0.399142	-1.32503	down
ko00230	Purine metabolism	0.0338954	ENSSSCG00000034919	GDA	K01487	EC:3.5.4.3	guanine deaminase [Source:NCBI gene;Acc:100621043]	0	0.044769	0.063896	0.072535	0	0	0	0.009402	19.2725	4.26847	up
ko04623	Cytosolic DNA-sensing pathway	0.0412814	ENSSSCG00000020970	IL6	K05405	NA	interleukin 6 [Source:NCBI gene;Acc:399500]	2.51923	2.82316	4.87588	5.13129	5.23923	6.45856	9.15744	20.8768	0.367813	-1.44296	down
ko04623	Cytosolic DNA-sensing pathway	0.0412814	ENSSSCG00000021383	CGAS	K17834	EC:2.7.7.86	cyclic GMP-AMP synthase [Source:NCBI gene;Acc:100516408]	0.211824	0.107048	0	0.176027	0.675164	0.29819	0.213437	0.677419	0.265474	-1.91336	down
ko04145	Phagosome	0.0423482	ENSSSCG00000001401	ENSSSCG00000001401	K02152	NA	ATPase H+ transporting V1 subunit G2 [Source:NCBI gene;Acc:100152358]	0.076847	0.137269	0.14906	0.045167	0.263849	0.368966	0.395026	0.27871	0.312535	-1.67791	down
ko04145	Phagosome	0.0423482	ENSSSCG00000010103	ENSSSCG00000010103	K07374	NA	tubulin alpha-3 chain [Source:NCBI gene;Acc:100155138]	0.107222	0.227949	0.129334	0.240343	0	0.068874	0	0.042865	6.30799	2.65718	up
ko04145	Phagosome	0.0423482	ENSSSCG00000029077	TUBAL3	K07374	NA	tubulin alpha like 3 [Source:NCBI gene;Acc:100623355]	0.007797	0.03003	0.008833	0.019154	0.076438	0.038824	0.057903	0.048124	0.297412	-1.74947	down
ko04621	NOD-like receptor signaling pathway	0.0456632	ENSSSCG00000007964	ENSSSCG00000007964	K12803	NA	MEFV, pyrin innate immunity regulator [Source:NCBI gene;Acc:100517333]	0.506142	0.41965	0.203777	0.837334	0.18061	0.282563	0.186357	0.178046	2.3767	1.24896	up
ko04621	NOD-like receptor signaling pathway	0.0456632	ENSSSCG00000014561	NLRP6	K20863	NA	NLR family pyrin domain containing 6 [Source:NCBI gene;Acc:100519245]	0.104384	0.039459	0.016589	0.052776	0.51811	0.05228	0.071686	0.125618	0.277725	-1.84827	down
ko04621	NOD-like receptor signaling pathway	0.0456632	ENSSSCG00000020970	IL6	K05405	NA	interleukin 6 [Source:NCBI gene;Acc:399500]	2.51923	2.82316	4.87588	5.13129	5.23923	6.45856	9.15744	20.8768	0.367813	-1.44296	down
ko04924	Renin secretion	0.0591792	ENSSSCG00000010325	KCNMA1	K04936	NA	potassium calcium-activated channel subfamily M alpha 1 [Source:NCBI gene;Acc:397434]	0.11953	0.0259335	0.020903	0.0945038	0.585101	0.119901	0.110312	0.14883	0.270572	-1.88592	down
ko04924	Renin secretion	0.0591792	ENSSSCG00000023924	PDE1A	K13755	EC:3.1.4.17	phosphodiesterase 1A [Source:NCBI gene;Acc:100152819]	0.184694	0.157517	0.102583	0.207681	0.415303	0.123247	0.136439	0.959707	0.399142	-1.32503	down
ko04911	Insulin secretion	0.0723441	ENSSSCG00000003069	KCNN4	K04945	NA	potassium calcium-activated channel subfamily N member 4 [Source:NCBI gene;Acc:397081]	0	0	0.140078	0.105751	0	0	0	0	614.572	9.26344	up
ko04911	Insulin secretion	0.0723441	ENSSSCG00000010325	KCNMA1	K04936	NA	potassium calcium-activated channel subfamily M alpha 1 [Source:NCBI gene;Acc:397434]	0.11953	0.0259335	0.020903	0.0945038	0.585101	0.119901	0.110312	0.14883	0.270572	-1.88592	down
ko05410	Hypertrophic cardiomyopathy (HCM)	0.074052	ENSSSCG00000017583	SGCA	K12565	NA	sarcoglycan alpha [Source:NCBI gene;Acc:100240723]	0	0	0.007643	0	0.088343	0.0481123	0	0.048865	0.0412421	-4.59974	down
ko05410	Hypertrophic cardiomyopathy (HCM)	0.074052	ENSSSCG00000020970	IL6	K05405	NA	interleukin 6 [Source:NCBI gene;Acc:399500]	2.51923	2.82316	4.87588	5.13129	5.23923	6.45856	9.15744	20.8768	0.367813	-1.44296	down
ko01521	EGFR tyrosine kinase inhibitor resistance	0.075773	ENSSSCG00000014052	EIF4E1B	K03259	NA	eukaryotic translation initiation factor 4E family member 1B [Source:NCBI gene;Acc:100523233]	0.188853	0	0.057771	0.658422	0	0	0.033915	0.007078	22.0781	4.46454	up
ko01521	EGFR tyrosine kinase inhibitor resistance	0.075773	ENSSSCG00000020970	IL6	K05405	NA	interleukin 6 [Source:NCBI gene;Acc:399500]	2.51923	2.82316	4.87588	5.13129	5.23923	6.45856	9.15744	20.8768	0.367813	-1.44296	down
ko05323	Rheumatoid arthritis	0.0775069	ENSSSCG00000001401	ENSSSCG00000001401	K02152	NA	ATPase H+ transporting V1 subunit G2 [Source:NCBI gene;Acc:100152358]	0.076847	0.137269	0.14906	0.045167	0.263849	0.368966	0.395026	0.27871	0.312535	-1.67791	down
ko05323	Rheumatoid arthritis	0.0775069	ENSSSCG00000020970	IL6	K05405	NA	interleukin 6 [Source:NCBI gene;Acc:399500]	2.51923	2.82316	4.87588	5.13129	5.23923	6.45856	9.15744	20.8768	0.367813	-1.44296	down
ko05414	Dilated cardiomyopathy (DCM)	0.0810125	ENSSSCG00000017583	SGCA	K12565	NA	sarcoglycan alpha [Source:NCBI gene;Acc:100240723]	0	0	0.007643	0	0.088343	0.0481123	0	0.048865	0.0412421	-4.59974	down
ko05414	Dilated cardiomyopathy (DCM)	0.0810125	ENSSSCG00000034163	PLN	K05852	NA	phospholamban [Source:NCBI gene;Acc:397421]	1.31763	0.663593	1.79408	2.5748	6.43865	2.88279	3.72296	8.02146	0.301441	-1.73005	down
ko04657	IL-17 signaling pathway	0.0810125	ENSSSCG00000014988	MMP13	K07994	EC:3.4.24.-	matrix metallopeptidase 13 [Source:NCBI gene;Acc:397346]	4.41573	0.779192	2.73243	0.822949	1.12681	0.478646	0.65519	0.178644	3.58723	1.84287	up
ko04657	IL-17 signaling pathway	0.0810125	ENSSSCG00000020970	IL6	K05405	NA	interleukin 6 [Source:NCBI gene;Acc:399500]	2.51923	2.82316	4.87588	5.13129	5.23923	6.45856	9.15744	20.8768	0.367813	-1.44296	down
ko04146	Peroxisome	0.0827839	ENSSSCG00000008522	XDH	K00106	1.17.3.2;EC:1.17.1.4	xanthine dehydrogenase [Source:NCBI gene;Acc:100515259]	0.252166	0.115657	0.157807	0.298556	0.0307525	0.0547913	0.0339726	0.0307205	5.48591	2.45573	up
ko04146	Peroxisome	0.0827839	ENSSSCG00000040317	SOD2	K04564	EC:1.15.1.1	superoxide dismutase 2 [Source:NCBI gene;Acc:100154319]	440.443	811.833	177.56	447.583	341.528	313.897	96.7074	127.848	2.13348	1.09321	up
ko04640	Hematopoietic cell lineage	0.0827839	ENSSSCG00000008742	CD38	K01242	2.4.99.20;EC:3.2.2.6	CD38 molecule [Source:NCBI gene;Acc:100511702]	3.70184	3.39609	0.812398	2.31241	1.78349	1.58737	0.572801	0.953064	2.08767	1.06189	up
ko04640	Hematopoietic cell lineage	0.0827839	ENSSSCG00000020970	IL6	K05405	NA	interleukin 6 [Source:NCBI gene;Acc:399500]	2.51923	2.82316	4.87588	5.13129	5.23923	6.45856	9.15744	20.8768	0.367813	-1.44296	down
ko04540	Gap junction	0.0881699	ENSSSCG00000010103	ENSSSCG00000010103	K07374	NA	tubulin alpha-3 chain [Source:NCBI gene;Acc:100155138]	0.107222	0.227949	0.129334	0.240343	0	0.068874	0	0.042865	6.30799	2.65718	up
ko04540	Gap junction	0.0881699	ENSSSCG00000029077	TUBAL3	K07374	NA	tubulin alpha like 3 [Source:NCBI gene;Acc:100623355]	0.007797	0.03003	0.008833	0.019154	0.076438	0.038824	0.057903	0.048124	0.297412	-1.74947	down
ko05032	Morphine addiction	0.0881699	ENSSSCG00000013754	CACNA1A	K04344	NA	calcium voltage-gated channel subunit alpha1 A [Source:NCBI gene;Acc:100525387]	0.02133	0.00985703	0.0134541	0.0178186	0.0498397	0.0472018	0.0284099	0.0521617	0.351662	-1.50774	down
ko05032	Morphine addiction	0.0881699	ENSSSCG00000023924	PDE1A	K13755	EC:3.1.4.17	phosphodiesterase 1A [Source:NCBI gene;Acc:100152819]	0.184694	0.157517	0.102583	0.207681	0.415303	0.123247	0.136439	0.959707	0.399142	-1.32503	down
ko04211	Longevity regulating pathway	0.0881699	ENSSSCG00000014052	EIF4E1B	K03259	NA	eukaryotic translation initiation factor 4E family member 1B [Source:NCBI gene;Acc:100523233]	0.188853	0	0.057771	0.658422	0	0	0.033915	0.007078	22.0781	4.46454	up
ko04211	Longevity regulating pathway	0.0881699	ENSSSCG00000040317	SOD2	K04564	EC:1.15.1.1	superoxide dismutase 2 [Source:NCBI gene;Acc:100154319]	440.443	811.833	177.56	447.583	341.528	313.897	96.7074	127.848	2.13348	1.09321	up
ko04972	Pancreatic secretion	0.0899884	ENSSSCG00000008742	CD38	K01242	2.4.99.20;EC:3.2.2.6	CD38 molecule [Source:NCBI gene;Acc:100511702]	3.70184	3.39609	0.812398	2.31241	1.78349	1.58737	0.572801	0.953064	2.08767	1.06189	up
ko04972	Pancreatic secretion	0.0899884	ENSSSCG00000010325	KCNMA1	K04936	NA	potassium calcium-activated channel subfamily M alpha 1 [Source:NCBI gene;Acc:397434]	0.11953	0.0259335	0.020903	0.0945038	0.585101	0.119901	0.110312	0.14883	0.270572	-1.88592	down
ko00360	Phenylalanine metabolism	0.0973993	ENSSSCG00000026349	ALDH3B2	K00129	EC:1.2.1.5	aldehyde dehydrogenase family 3 member B2-like [Source:NCBI gene;Acc:100522421]	0	0	0	0	0.070135	0	0	0.366194	0.000916739	-10.0912	down
ko04066	HIF-1 signaling pathway	0.104928	ENSSSCG00000014052	EIF4E1B	K03259	NA	eukaryotic translation initiation factor 4E family member 1B [Source:NCBI gene;Acc:100523233]	0.188853	0	0.057771	0.658422	0	0	0.033915	0.007078	22.0781	4.46454	up
ko04066	HIF-1 signaling pathway	0.104928	ENSSSCG00000020970	IL6	K05405	NA	interleukin 6 [Source:NCBI gene;Acc:399500]	2.51923	2.82316	4.87588	5.13129	5.23923	6.45856	9.15744	20.8768	0.367813	-1.44296	down
ko04744	Phototransduction	0.118938	ENSSSCG00000001636	GUCA1A	K08328	NA	guanylate cyclase activator 1A [Source:NCBI gene;Acc:100739200]	0.062988	0.164763	0.236424	0.111331	0.353288	0.30342	0.380666	0.222057	0.456957	-1.12987	down
ko00340	Histidine metabolism	0.124244	ENSSSCG00000026349	ALDH3B2	K00129	EC:1.2.1.5	aldehyde dehydrogenase family 3 member B2-like [Source:NCBI gene;Acc:100522421]	0	0	0	0	0.070135	0	0	0.366194	0.000916739	-10.0912	down
ko04724	Glutamatergic synapse	0.128488	ENSSSCG00000013754	CACNA1A	K04344	NA	calcium voltage-gated channel subunit alpha1 A [Source:NCBI gene;Acc:100525387]	0.02133	0.00985703	0.0134541	0.0178186	0.0498397	0.0472018	0.0284099	0.0521617	0.351662	-1.50774	down
ko04724	Glutamatergic synapse	0.128488	ENSSSCG00000038946	SLC17A8	K12302	NA	solute carrier family 17 member 8 [Source:NCBI gene;Acc:100526221]	0.557141	0.599388	0.741513	0.662693	0.206377	0.366996	0.426302	0.224553	2.09171	1.06469	up
ko04966	Collecting duct acid secretion	0.139975	ENSSSCG00000001401	ENSSSCG00000001401	K02152	NA	ATPase H+ transporting V1 subunit G2 [Source:NCBI gene;Acc:100152358]	0.076847	0.137269	0.14906	0.045167	0.263849	0.368966	0.395026	0.27871	0.312535	-1.67791	down
ko05332	Graft-versus-host disease	0.15031	ENSSSCG00000020970	IL6	K05405	NA	interleukin 6 [Source:NCBI gene;Acc:399500]	2.51923	2.82316	4.87588	5.13129	5.23923	6.45856	9.15744	20.8768	0.367813	-1.44296	down
ko00760	Nicotinate and nicotinamide metabolism	0.15031	ENSSSCG00000008742	CD38	K01242	2.4.99.20;EC:3.2.2.6	CD38 molecule [Source:NCBI gene;Acc:100511702]	3.70184	3.39609	0.812398	2.31241	1.78349	1.58737	0.572801	0.953064	2.08767	1.06189	up
ko01523	Antifolate resistance	0.155432	ENSSSCG00000020970	IL6	K05405	NA	interleukin 6 [Source:NCBI gene;Acc:399500]	2.51923	2.82316	4.87588	5.13129	5.23923	6.45856	9.15744	20.8768	0.367813	-1.44296	down
ko00052	Galactose metabolism	0.155432	ENSSSCG00000011735	SI	K01203	3.2.1.10;EC:3.2.1.48	sucrase-isomaltase [Source:NCBI gene;Acc:100623884]	0	0	0.126363	0	0	0	0	0	315.907	8.30336	up
ko05020	Prion diseases	0.160524	ENSSSCG00000020970	IL6	K05405	NA	interleukin 6 [Source:NCBI gene;Acc:399500]	2.51923	2.82316	4.87588	5.13129	5.23923	6.45856	9.15744	20.8768	0.367813	-1.44296	down
ko00500	Starch and sucrose metabolism	0.165586	ENSSSCG00000011735	SI	K01203	3.2.1.10;EC:3.2.1.48	sucrase-isomaltase [Source:NCBI gene;Acc:100623884]	0	0	0.126363	0	0	0	0	0	315.907	8.30336	up
ko04068	FoxO signaling pathway	0.170121	ENSSSCG00000020970	IL6	K05405	NA	interleukin 6 [Source:NCBI gene;Acc:399500]	2.51923	2.82316	4.87588	5.13129	5.23923	6.45856	9.15744	20.8768	0.367813	-1.44296	down
ko04068	FoxO signaling pathway	0.170121	ENSSSCG00000040317	SOD2	K04564	EC:1.15.1.1	superoxide dismutase 2 [Source:NCBI gene;Acc:100154319]	440.443	811.833	177.56	447.583	341.528	313.897	96.7074	127.848	2.13348	1.09321	up
ko04270	Vascular smooth muscle contraction	0.170121	ENSSSCG00000008294	ACTG2	K12315	NA	actin, gamma 2, smooth muscle, enteric [Source:NCBI gene;Acc:100520667]	4.60373	0.917775	6.16586	1.4254	13.9919	5.35347	4.98534	7.95061	0.406204	-1.29973	down
ko04270	Vascular smooth muscle contraction	0.170121	ENSSSCG00000010325	KCNMA1	K04936	NA	potassium calcium-activated channel subfamily M alpha 1 [Source:NCBI gene;Acc:397434]	0.11953	0.0259335	0.020903	0.0945038	0.585101	0.119901	0.110312	0.14883	0.270572	-1.88592	down
ko00410	beta-Alanine metabolism	0.170618	ENSSSCG00000026349	ALDH3B2	K00129	EC:1.2.1.5	aldehyde dehydrogenase family 3 member B2-like [Source:NCBI gene;Acc:100522421]	0	0	0	0	0.070135	0	0	0.366194	0.000916739	-10.0912	down
ko04210	Apoptosis	0.17441	ENSSSCG00000010103	ENSSSCG00000010103	K07374	NA	tubulin alpha-3 chain [Source:NCBI gene;Acc:100155138]	0.107222	0.227949	0.129334	0.240343	0	0.068874	0	0.042865	6.30799	2.65718	up
ko04210	Apoptosis	0.17441	ENSSSCG00000029077	TUBAL3	K07374	NA	tubulin alpha like 3 [Source:NCBI gene;Acc:100623355]	0.007797	0.03003	0.008833	0.019154	0.076438	0.038824	0.057903	0.048124	0.297412	-1.74947	down
ko00350	Tyrosine metabolism	0.17562	ENSSSCG00000026349	ALDH3B2	K00129	EC:1.2.1.5	aldehyde dehydrogenase family 3 member B2-like [Source:NCBI gene;Acc:100522421]	0	0	0	0	0.070135	0	0	0.366194	0.000916739	-10.0912	down
ko05143	African trypanosomiasis	0.180594	ENSSSCG00000020970	IL6	K05405	NA	interleukin 6 [Source:NCBI gene;Acc:399500]	2.51923	2.82316	4.87588	5.13129	5.23923	6.45856	9.15744	20.8768	0.367813	-1.44296	down
ko04973	Carbohydrate digestion and absorption	0.190453	ENSSSCG00000011735	SI	K01203	3.2.1.10;EC:3.2.1.48	sucrase-isomaltase [Source:NCBI gene;Acc:100623884]	0	0	0.126363	0	0	0	0	0	315.907	8.30336	up
ko04723	Retrograde endocannabinoid signaling	0.196111	ENSSSCG00000013754	CACNA1A	K04344	NA	calcium voltage-gated channel subunit alpha1 A [Source:NCBI gene;Acc:100525387]	0.02133	0.00985703	0.0134541	0.0178186	0.0498397	0.0472018	0.0284099	0.0521617	0.351662	-1.50774	down
ko04723	Retrograde endocannabinoid signaling	0.196111	ENSSSCG00000038946	SLC17A8	K12302	NA	solute carrier family 17 member 8 [Source:NCBI gene;Acc:100526221]	0.557141	0.599388	0.741513	0.662693	0.206377	0.366996	0.426302	0.224553	2.09171	1.06469	up
ko04630	Jak-STAT signaling pathway	0.198302	ENSSSCG00000020970	IL6	K05405	NA	interleukin 6 [Source:NCBI gene;Acc:399500]	2.51923	2.82316	4.87588	5.13129	5.23923	6.45856	9.15744	20.8768	0.367813	-1.44296	down
ko04630	Jak-STAT signaling pathway	0.198302	ENSSSCG00000039721	PRL	K05439	NA	prolactin [Source:NCBI gene;Acc:396965]	0	0	0	0	0.017715	0	0.066378	0.032532	0.0034298	-8.18766	down
ko04672	Intestinal immune network for IgA production	0.200196	ENSSSCG00000020970	IL6	K05405	NA	interleukin 6 [Source:NCBI gene;Acc:399500]	2.51923	2.82316	4.87588	5.13129	5.23923	6.45856	9.15744	20.8768	0.367813	-1.44296	down
ko03440	Homologous recombination	0.205025	ENSSSCG00000011910	ENSSSCG00000011910	K10881	NA	SEM1, 26S proteasome complex subunit [Source:NCBI gene;Acc:100155621]	0.832802	0.563205	2.46644	2.17273	0.358046	0.75689	0.188579	0.116318	4.25063	2.08768	up
ko00982	Drug metabolism - cytochrome P450	0.205025	ENSSSCG00000026349	ALDH3B2	K00129	EC:1.2.1.5	aldehyde dehydrogenase family 3 member B2-like [Source:NCBI gene;Acc:100522421]	0	0	0	0	0.070135	0	0	0.366194	0.000916739	-10.0912	down
ko04080	Neuroactive ligand-receptor interaction	0.211525	ENSSSCG00000009735	P2RX2	K05216	NA	purinergic receptor P2X 2 [Source:NCBI gene;Acc:100736581]	0	0.124022	0.170384	0.0845002	0	0	0	0	947.265	9.88762	up
ko04080	Neuroactive ligand-receptor interaction	0.211525	ENSSSCG00000037684	PDYN	K15840	NA	prodynorphin [Source:NCBI gene;Acc:445529]	1.54458	1.47723	2.49974	1.41827	2.6421	22.0147	1.64546	2.12709	0.244107	-2.03441	down
ko04080	Neuroactive ligand-receptor interaction	0.211525	ENSSSCG00000039721	PRL	K05439	NA	prolactin [Source:NCBI gene;Acc:396965]	0	0	0	0	0.017715	0	0.066378	0.032532	0.0034298	-8.18766	down
ko00980	Metabolism of xenobiotics by cytochrome P450	0.214598	ENSSSCG00000026349	ALDH3B2	K00129	EC:1.2.1.5	aldehyde dehydrogenase family 3 member B2-like [Source:NCBI gene;Acc:100522421]	0	0	0	0	0.070135	0	0	0.366194	0.000916739	-10.0912	down
ko04150	mTOR signaling pathway	0.215937	ENSSSCG00000001401	ENSSSCG00000001401	K02152	NA	ATPase H+ transporting V1 subunit G2 [Source:NCBI gene;Acc:100152358]	0.076847	0.137269	0.14906	0.045167	0.263849	0.368966	0.395026	0.27871	0.312535	-1.67791	down
ko04150	mTOR signaling pathway	0.215937	ENSSSCG00000014052	EIF4E1B	K03259	NA	eukaryotic translation initiation factor 4E family member 1B [Source:NCBI gene;Acc:100523233]	0.188853	0	0.057771	0.658422	0	0	0.033915	0.007078	22.0781	4.46454	up
ko03050	Proteasome	0.219342	ENSSSCG00000011910	ENSSSCG00000011910	K10881	NA	SEM1, 26S proteasome complex subunit [Source:NCBI gene;Acc:100155621]	0.832802	0.563205	2.46644	2.17273	0.358046	0.75689	0.188579	0.116318	4.25063	2.08768	up
ko00565	Ether lipid metabolism	0.224058	ENSSSCG00000010009	GAL3ST1	K01019	EC:2.8.2.11	galactose-3-O-sulfotransferase 1 [Source:NCBI gene;Acc:100155265]	0.0467954	0.0789851	0.115817	0.0450968	0.186846	0.185555	0.188765	0.104908	0.430424	-1.21617	down
ko04930	Type II diabetes mellitus	0.224058	ENSSSCG00000013754	CACNA1A	K04344	NA	calcium voltage-gated channel subunit alpha1 A [Source:NCBI gene;Acc:100525387]	0.02133	0.00985703	0.0134541	0.0178186	0.0498397	0.0472018	0.0284099	0.0521617	0.351662	-1.50774	down
ko04022	cGMP-PKG signaling pathway	0.227041	ENSSSCG00000010325	KCNMA1	K04936	NA	potassium calcium-activated channel subfamily M alpha 1 [Source:NCBI gene;Acc:397434]	0.11953	0.0259335	0.020903	0.0945038	0.585101	0.119901	0.110312	0.14883	0.270572	-1.88592	down
ko04022	cGMP-PKG signaling pathway	0.227041	ENSSSCG00000034163	PLN	K05852	NA	phospholamban [Source:NCBI gene;Acc:397421]	1.31763	0.663593	1.79408	2.5748	6.43865	2.88279	3.72296	8.02146	0.301441	-1.73005	down
ko05030	Cocaine addiction	0.228746	ENSSSCG00000037684	PDYN	K15840	NA	prodynorphin [Source:NCBI gene;Acc:445529]	1.54458	1.47723	2.49974	1.41827	2.6421	22.0147	1.64546	2.12709	0.244107	-2.03441	down
ko04530	Tight junction	0.231496	ENSSSCG00000010103	ENSSSCG00000010103	K07374	NA	tubulin alpha-3 chain [Source:NCBI gene;Acc:100155138]	0.107222	0.227949	0.129334	0.240343	0	0.068874	0	0.042865	6.30799	2.65718	up
ko04530	Tight junction	0.231496	ENSSSCG00000029077	TUBAL3	K07374	NA	tubulin alpha like 3 [Source:NCBI gene;Acc:100623355]	0.007797	0.03003	0.008833	0.019154	0.076438	0.038824	0.057903	0.048124	0.297412	-1.74947	down
ko04979	Cholesterol metabolism	0.233407	ENSSSCG00000040746	LRP2	K06233	NA	LDL receptor related protein 2 [Source:NCBI gene;Acc:100519689]	0.295167	0.701586	0.542765	0.959293	0.184023	0.427094	0.234247	0.380174	2.03895	1.02783	up
ko04340	Hedgehog signaling pathway	0.233407	ENSSSCG00000040746	LRP2	K06233	NA	LDL receptor related protein 2 [Source:NCBI gene;Acc:100519689]	0.295167	0.701586	0.542765	0.959293	0.184023	0.427094	0.234247	0.380174	2.03895	1.02783	up
ko05144	Malaria	0.242647	ENSSSCG00000020970	IL6	K05405	NA	interleukin 6 [Source:NCBI gene;Acc:399500]	2.51923	2.82316	4.87588	5.13129	5.23923	6.45856	9.15744	20.8768	0.367813	-1.44296	down
ko05134	Legionellosis	0.242647	ENSSSCG00000020970	IL6	K05405	NA	interleukin 6 [Source:NCBI gene;Acc:399500]	2.51923	2.82316	4.87588	5.13129	5.23923	6.45856	9.15744	20.8768	0.367813	-1.44296	down
ko00600	Sphingolipid metabolism	0.242647	ENSSSCG00000010009	GAL3ST1	K01019	EC:2.8.2.11	galactose-3-O-sulfotransferase 1 [Source:NCBI gene;Acc:100155265]	0.0467954	0.0789851	0.115817	0.0450968	0.186846	0.185555	0.188765	0.104908	0.430424	-1.21617	down
ko05204	Chemical carcinogenesis	0.247226	ENSSSCG00000026349	ALDH3B2	K00129	EC:1.2.1.5	aldehyde dehydrogenase family 3 member B2-like [Source:NCBI gene;Acc:100522421]	0	0	0	0	0.070135	0	0	0.366194	0.000916739	-10.0912	down
ko05416	Viral myocarditis	0.256303	ENSSSCG00000017583	SGCA	K12565	NA	sarcoglycan alpha [Source:NCBI gene;Acc:100240723]	0	0	0.007643	0	0.088343	0.0481123	0	0.048865	0.0412421	-4.59974	down
ko04923	Regulation of lipolysis in adipocytes	0.256303	ENSSSCG00000001844	PLIN1	K08768	NA	perilipin 1 [Source:NCBI gene;Acc:654411]	0.0876927	0	0.0253353	0.169325	0	0	0	0	705.882	9.46328	up
ko00983	Drug metabolism - other enzymes	0.265274	ENSSSCG00000008522	XDH	K00106	1.17.3.2;EC:1.17.1.4	xanthine dehydrogenase [Source:NCBI gene;Acc:100515259]	0.252166	0.115657	0.157807	0.298556	0.0307525	0.0547913	0.0339726	0.0307205	5.48591	2.45573	up
ko05321	Inflammatory bowel disease (IBD)	0.274139	ENSSSCG00000020970	IL6	K05405	NA	interleukin 6 [Source:NCBI gene;Acc:399500]	2.51923	2.82316	4.87588	5.13129	5.23923	6.45856	9.15744	20.8768	0.367813	-1.44296	down
ko05168	Herpes simplex virus 1 infection	0.277882	ENSSSCG00000020970	IL6	K05405	NA	interleukin 6 [Source:NCBI gene;Acc:399500]	2.51923	2.82316	4.87588	5.13129	5.23923	6.45856	9.15744	20.8768	0.367813	-1.44296	down
ko05168	Herpes simplex virus 1 infection	0.277882	ENSSSCG00000021383	CGAS	K17834	EC:2.7.7.86	cyclic GMP-AMP synthase [Source:NCBI gene;Acc:100516408]	0.211824	0.107048	0	0.176027	0.675164	0.29819	0.213437	0.677419	0.265474	-1.91336	down
ko05168	Herpes simplex virus 1 infection	0.277882	ENSSSCG00000026695	TNFSF14	K05477	NA	TNF superfamily member 14 [Source:NCBI gene;Acc:100519468]	0.056141	0	0.20312	0.057648	0	0	0	0	792.273	9.62985	up
ko04213	Longevity regulating pathway - multiple species	0.278533	ENSSSCG00000040317	SOD2	K04564	EC:1.15.1.1	superoxide dismutase 2 [Source:NCBI gene;Acc:100154319]	440.443	811.833	177.56	447.583	341.528	313.897	96.7074	127.848	2.13348	1.09321	up
ko04151	PI3K-Akt signaling pathway	0.279536	ENSSSCG00000014052	EIF4E1B	K03259	NA	eukaryotic translation initiation factor 4E family member 1B [Source:NCBI gene;Acc:100523233]	0.188853	0	0.057771	0.658422	0	0	0.033915	0.007078	22.0781	4.46454	up
ko04151	PI3K-Akt signaling pathway	0.279536	ENSSSCG00000020970	IL6	K05405	NA	interleukin 6 [Source:NCBI gene;Acc:399500]	2.51923	2.82316	4.87588	5.13129	5.23923	6.45856	9.15744	20.8768	0.367813	-1.44296	down
ko04151	PI3K-Akt signaling pathway	0.279536	ENSSSCG00000039721	PRL	K05439	NA	prolactin [Source:NCBI gene;Acc:396965]	0	0	0	0	0.017715	0	0.066378	0.032532	0.0034298	-8.18766	down
ko05169	Epstein-Barr virus infection	0.285277	ENSSSCG00000011910	ENSSSCG00000011910	K10881	NA	SEM1, 26S proteasome complex subunit [Source:NCBI gene;Acc:100155621]	0.832802	0.563205	2.46644	2.17273	0.358046	0.75689	0.188579	0.116318	4.25063	2.08768	up
ko05169	Epstein-Barr virus infection	0.285277	ENSSSCG00000020970	IL6	K05405	NA	interleukin 6 [Source:NCBI gene;Acc:399500]	2.51923	2.82316	4.87588	5.13129	5.23923	6.45856	9.15744	20.8768	0.367813	-1.44296	down
ko04730	Long-term depression	0.287243	ENSSSCG00000013754	CACNA1A	K04344	NA	calcium voltage-gated channel subunit alpha1 A [Source:NCBI gene;Acc:100525387]	0.02133	0.00985703	0.0134541	0.0178186	0.0498397	0.0472018	0.0284099	0.0521617	0.351662	-1.50774	down
ko00010	Glycolysis / Gluconeogenesis	0.300115	ENSSSCG00000026349	ALDH3B2	K00129	EC:1.2.1.5	aldehyde dehydrogenase family 3 member B2-like [Source:NCBI gene;Acc:100522421]	0	0	0	0	0.070135	0	0	0.366194	0.000916739	-10.0912	down
ko05031	Amphetamine addiction	0.308571	ENSSSCG00000037684	PDYN	K15840	NA	prodynorphin [Source:NCBI gene;Acc:445529]	1.54458	1.47723	2.49974	1.41827	2.6421	22.0147	1.64546	2.12709	0.244107	-2.03441	down
ko05412	Arrhythmogenic right ventricular cardiomyopathy (ARVC)	0.325185	ENSSSCG00000017583	SGCA	K12565	NA	sarcoglycan alpha [Source:NCBI gene;Acc:100240723]	0	0	0.007643	0	0.088343	0.0481123	0	0.048865	0.0412421	-4.59974	down
ko04917	Prolactin signaling pathway	0.333346	ENSSSCG00000039721	PRL	K05439	NA	prolactin [Source:NCBI gene;Acc:396965]	0	0	0	0	0.017715	0	0.066378	0.032532	0.0034298	-8.18766	down
ko04918	Thyroid hormone synthesis	0.333346	ENSSSCG00000040746	LRP2	K06233	NA	LDL receptor related protein 2 [Source:NCBI gene;Acc:100519689]	0.295167	0.701586	0.542765	0.959293	0.184023	0.427094	0.234247	0.380174	2.03895	1.02783	up
ko04974	Protein digestion and absorption	0.333346	ENSSSCG00000003069	KCNN4	K04945	NA	potassium calcium-activated channel subfamily N member 4 [Source:NCBI gene;Acc:397081]	0	0	0.140078	0.105751	0	0	0	0	614.572	9.26344	up
ko03320	PPAR signaling pathway	0.34141	ENSSSCG00000001844	PLIN1	K08768	NA	perilipin 1 [Source:NCBI gene;Acc:654411]	0.0876927	0	0.0253353	0.169325	0	0	0	0	705.882	9.46328	up
ko05133	Pertussis	0.34141	ENSSSCG00000020970	IL6	K05405	NA	interleukin 6 [Source:NCBI gene;Acc:399500]	2.51923	2.82316	4.87588	5.13129	5.23923	6.45856	9.15744	20.8768	0.367813	-1.44296	down
ko05132	Salmonella infection	0.345407	ENSSSCG00000020970	IL6	K05405	NA	interleukin 6 [Source:NCBI gene;Acc:399500]	2.51923	2.82316	4.87588	5.13129	5.23923	6.45856	9.15744	20.8768	0.367813	-1.44296	down
ko05163	Human cytomegalovirus infection	0.349916	ENSSSCG00000020970	IL6	K05405	NA	interleukin 6 [Source:NCBI gene;Acc:399500]	2.51923	2.82316	4.87588	5.13129	5.23923	6.45856	9.15744	20.8768	0.367813	-1.44296	down
ko05163	Human cytomegalovirus infection	0.349916	ENSSSCG00000021383	CGAS	K17834	EC:2.7.7.86	cyclic GMP-AMP synthase [Source:NCBI gene;Acc:100516408]	0.211824	0.107048	0	0.176027	0.675164	0.29819	0.213437	0.677419	0.265474	-1.91336	down
ko04727	GABAergic synapse	0.38784	ENSSSCG00000013754	CACNA1A	K04344	NA	calcium voltage-gated channel subunit alpha1 A [Source:NCBI gene;Acc:100525387]	0.02133	0.00985703	0.0134541	0.0178186	0.0498397	0.0472018	0.0284099	0.0521617	0.351662	-1.50774	down
ko04064	NF-kappa B signaling pathway	0.398939	ENSSSCG00000026695	TNFSF14	K05477	NA	TNF superfamily member 14 [Source:NCBI gene;Acc:100519468]	0.056141	0	0.20312	0.057648	0	0	0	0	792.273	9.62985	up
ko05146	Amoebiasis	0.402596	ENSSSCG00000020970	IL6	K05405	NA	interleukin 6 [Source:NCBI gene;Acc:399500]	2.51923	2.82316	4.87588	5.13129	5.23923	6.45856	9.15744	20.8768	0.367813	-1.44296	down
ko04620	Toll-like receptor signaling pathway	0.417005	ENSSSCG00000020970	IL6	K05405	NA	interleukin 6 [Source:NCBI gene;Acc:399500]	2.51923	2.82316	4.87588	5.13129	5.23923	6.45856	9.15744	20.8768	0.367813	-1.44296	down
ko04933	AGE-RAGE signaling pathway in diabetic complications	0.431076	ENSSSCG00000020970	IL6	K05405	NA	interleukin 6 [Source:NCBI gene;Acc:399500]	2.51923	2.82316	4.87588	5.13129	5.23923	6.45856	9.15744	20.8768	0.367813	-1.44296	down
ko04659	Th17 cell differentiation	0.434542	ENSSSCG00000020970	IL6	K05405	NA	interleukin 6 [Source:NCBI gene;Acc:399500]	2.51923	2.82316	4.87588	5.13129	5.23923	6.45856	9.15744	20.8768	0.367813	-1.44296	down
ko04625	C-type lectin receptor signaling pathway	0.437987	ENSSSCG00000020970	IL6	K05405	NA	interleukin 6 [Source:NCBI gene;Acc:399500]	2.51923	2.82316	4.87588	5.13129	5.23923	6.45856	9.15744	20.8768	0.367813	-1.44296	down
ko04668	TNF signaling pathway	0.444816	ENSSSCG00000020970	IL6	K05405	NA	interleukin 6 [Source:NCBI gene;Acc:399500]	2.51923	2.82316	4.87588	5.13129	5.23923	6.45856	9.15744	20.8768	0.367813	-1.44296	down
ko04726	Serotonergic synapse	0.451564	ENSSSCG00000013754	CACNA1A	K04344	NA	calcium voltage-gated channel subunit alpha1 A [Source:NCBI gene;Acc:100525387]	0.02133	0.00985703	0.0134541	0.0178186	0.0498397	0.0472018	0.0284099	0.0521617	0.351662	-1.50774	down
ko05142	Chagas disease (American trypanosomiasis)	0.458233	ENSSSCG00000020970	IL6	K05405	NA	interleukin 6 [Source:NCBI gene;Acc:399500]	2.51923	2.82316	4.87588	5.13129	5.23923	6.45856	9.15744	20.8768	0.367813	-1.44296	down
ko04928	Parathyroid hormone synthesis, secretion and action	0.464822	ENSSSCG00000014988	MMP13	K07994	EC:3.4.24.-	matrix metallopeptidase 13 [Source:NCBI gene;Acc:397346]	4.41573	0.779192	2.73243	0.822949	1.12681	0.478646	0.65519	0.178644	3.58723	1.84287	up
ko04931	Insulin resistance	0.468087	ENSSSCG00000020970	IL6	K05405	NA	interleukin 6 [Source:NCBI gene;Acc:399500]	2.51923	2.82316	4.87588	5.13129	5.23923	6.45856	9.15744	20.8768	0.367813	-1.44296	down
ko04919	Thyroid hormone signaling pathway	0.468087	ENSSSCG00000034163	PLN	K05852	NA	phospholamban [Source:NCBI gene;Acc:397421]	1.31763	0.663593	1.79408	2.5748	6.43865	2.88279	3.72296	8.02146	0.301441	-1.73005	down
ko04725	Cholinergic synapse	0.477767	ENSSSCG00000013754	CACNA1A	K04344	NA	calcium voltage-gated channel subunit alpha1 A [Source:NCBI gene;Acc:100525387]	0.02133	0.00985703	0.0134541	0.0178186	0.0498397	0.0472018	0.0284099	0.0521617	0.351662	-1.50774	down
ko04728	Dopaminergic synapse	0.508812	ENSSSCG00000013754	CACNA1A	K04344	NA	calcium voltage-gated channel subunit alpha1 A [Source:NCBI gene;Acc:100525387]	0.02133	0.00985703	0.0134541	0.0178186	0.0498397	0.0472018	0.0284099	0.0521617	0.351662	-1.50774	down
ko04550	Signaling pathways regulating pluripotency of stem cells	0.523653	ENSSSCG00000031080	HAND1	K09071	NA	heart and neural crest derivatives expressed 1 [Source:NCBI gene;Acc:541594]	0.012135	0.076182	0	0.013521	0	0	0	0	254.595	7.99206	up
ko05162	Measles	0.523653	ENSSSCG00000020970	IL6	K05405	NA	interleukin 6 [Source:NCBI gene;Acc:399500]	2.51923	2.82316	4.87588	5.13129	5.23923	6.45856	9.15744	20.8768	0.367813	-1.44296	down
ko04926	Relaxin signaling pathway	0.523653	ENSSSCG00000014988	MMP13	K07994	EC:3.4.24.-	matrix metallopeptidase 13 [Source:NCBI gene;Acc:397346]	4.41573	0.779192	2.73243	0.822949	1.12681	0.478646	0.65519	0.178644	3.58723	1.84287	up
ko04514	Cell adhesion molecules (CAMs)	0.532347	ENSSSCG00000021315	ENSSSCG00000021315	K07377	NA	neurexin 3 [Source:NCBI gene;Acc:100620189]	0	0.0829555	0.028664	0.0390683	0	0	0	0	376.72	8.55735	up
ko04371	Apelin signaling pathway	0.53521	ENSSSCG00000001844	PLIN1	K08768	NA	perilipin 1 [Source:NCBI gene;Acc:654411]	0.0876927	0	0.0253353	0.169325	0	0	0	0	705.882	9.46328	up
ko04910	Insulin signaling pathway	0.538056	ENSSSCG00000014052	EIF4E1B	K03259	NA	eukaryotic translation initiation factor 4E family member 1B [Source:NCBI gene;Acc:100523233]	0.188853	0	0.057771	0.658422	0	0	0.033915	0.007078	22.0781	4.46454	up
ko00190	Oxidative phosphorylation	0.538056	ENSSSCG00000001401	ENSSSCG00000001401	K02152	NA	ATPase H+ transporting V1 subunit G2 [Source:NCBI gene;Acc:100152358]	0.076847	0.137269	0.14906	0.045167	0.263849	0.368966	0.395026	0.27871	0.312535	-1.67791	down
ko04261	Adrenergic signaling in cardiomyocytes	0.540886	ENSSSCG00000034163	PLN	K05852	NA	phospholamban [Source:NCBI gene;Acc:397421]	1.31763	0.663593	1.79408	2.5748	6.43865	2.88279	3.72296	8.02146	0.301441	-1.73005	down
ko05034	Alcoholism	0.540886	ENSSSCG00000037684	PDYN	K15840	NA	prodynorphin [Source:NCBI gene;Acc:445529]	1.54458	1.47723	2.49974	1.41827	2.6421	22.0147	1.64546	2.12709	0.244107	-2.03441	down
ko04740	Olfactory transduction	0.546494	ENSSSCG00000023924	PDE1A	K13755	EC:3.1.4.17	phosphodiesterase 1A [Source:NCBI gene;Acc:100152819]	0.184694	0.157517	0.102583	0.207681	0.415303	0.123247	0.136439	0.959707	0.399142	-1.32503	down
ko05164	Influenza A	0.568268	ENSSSCG00000020970	IL6	K05405	NA	interleukin 6 [Source:NCBI gene;Acc:399500]	2.51923	2.82316	4.87588	5.13129	5.23923	6.45856	9.15744	20.8768	0.367813	-1.44296	down
ko04932	Non-alcoholic fatty liver disease (NAFLD)	0.570917	ENSSSCG00000020970	IL6	K05405	NA	interleukin 6 [Source:NCBI gene;Acc:399500]	2.51923	2.82316	4.87588	5.13129	5.23923	6.45856	9.15744	20.8768	0.367813	-1.44296	down
ko04921	Oxytocin signaling pathway	0.57355	ENSSSCG00000008742	CD38	K01242	2.4.99.20;EC:3.2.2.6	CD38 molecule [Source:NCBI gene;Acc:100511702]	3.70184	3.39609	0.812398	2.31241	1.78349	1.58737	0.572801	0.953064	2.08767	1.06189	up
ko04218	Cellular senescence	0.57877	ENSSSCG00000020970	IL6	K05405	NA	interleukin 6 [Source:NCBI gene;Acc:399500]	2.51923	2.82316	4.87588	5.13129	5.23923	6.45856	9.15744	20.8768	0.367813	-1.44296	down
ko03013	RNA transport	0.583927	ENSSSCG00000014052	EIF4E1B	K03259	NA	eukaryotic translation initiation factor 4E family member 1B [Source:NCBI gene;Acc:100523233]	0.188853	0	0.057771	0.658422	0	0	0.033915	0.007078	22.0781	4.46454	up
ko04390	Hippo signaling pathway	0.591548	ENSSSCG00000005584	CRB2	K16681	NA	crumbs cell polarity complex component 2 [Source:NCBI gene;Acc:100511431]	0.040431	0.018636	0.010025	0.022794	0	0	0	0.010935	8.40293	3.07089	up
ko05161	Hepatitis B	0.601497	ENSSSCG00000020970	IL6	K05405	NA	interleukin 6 [Source:NCBI gene;Acc:399500]	2.51923	2.82316	4.87588	5.13129	5.23923	6.45856	9.15744	20.8768	0.367813	-1.44296	down
ko05152	Tuberculosis	0.603948	ENSSSCG00000020970	IL6	K05405	NA	interleukin 6 [Source:NCBI gene;Acc:399500]	2.51923	2.82316	4.87588	5.13129	5.23923	6.45856	9.15744	20.8768	0.367813	-1.44296	down
ko05202	Transcriptional misregulation in cancer	0.608805	ENSSSCG00000020970	IL6	K05405	NA	interleukin 6 [Source:NCBI gene;Acc:399500]	2.51923	2.82316	4.87588	5.13129	5.23923	6.45856	9.15744	20.8768	0.367813	-1.44296	down
ko05167	Kaposi sarcoma-associated herpesvirus infection	0.629952	ENSSSCG00000020970	IL6	K05405	NA	interleukin 6 [Source:NCBI gene;Acc:399500]	2.51923	2.82316	4.87588	5.13129	5.23923	6.45856	9.15744	20.8768	0.367813	-1.44296	down
ko04360	Axon guidance	0.65429	ENSSSCG00000024492	EPHB1	K05110	EC:2.7.10.1	EPH receptor B1 [Source:NCBI gene;Acc:100524585]	0.040072	0.135855	0.125182	0.079682	0.16303	0.106112	0.412634	0.215447	0.424411	-1.23647	down
ko05016	Huntington disease	0.660653	ENSSSCG00000040317	SOD2	K04564	EC:1.15.1.1	superoxide dismutase 2 [Source:NCBI gene;Acc:100154319]	440.443	811.833	177.56	447.583	341.528	313.897	96.7074	127.848	2.13348	1.09321	up
ko04024	cAMP signaling pathway	0.677067	ENSSSCG00000034163	PLN	K05852	NA	phospholamban [Source:NCBI gene;Acc:397421]	1.31763	0.663593	1.79408	2.5748	6.43865	2.88279	3.72296	8.02146	0.301441	-1.73005	down
ko05170	Human immunodeficiency virus 1 infection	0.684982	ENSSSCG00000021383	CGAS	K17834	EC:2.7.7.86	cyclic GMP-AMP synthase [Source:NCBI gene;Acc:100516408]	0.211824	0.107048	0	0.176027	0.675164	0.29819	0.213437	0.677419	0.265474	-1.91336	down
ko05166	Human T-cell leukemia virus 1 infection	0.709423	ENSSSCG00000020970	IL6	K05405	NA	interleukin 6 [Source:NCBI gene;Acc:399500]	2.51923	2.82316	4.87588	5.13129	5.23923	6.45856	9.15744	20.8768	0.367813	-1.44296	down
ko04714	Thermogenesis	0.743459	ENSSSCG00000001844	PLIN1	K08768	NA	perilipin 1 [Source:NCBI gene;Acc:654411]	0.0876927	0	0.0253353	0.169325	0	0	0	0	705.882	9.46328	up
ko04010	MAPK signaling pathway	0.808879	ENSSSCG00000013754	CACNA1A	K04344	NA	calcium voltage-gated channel subunit alpha1 A [Source:NCBI gene;Acc:100525387]	0.02133	0.00985703	0.0134541	0.0178186	0.0498397	0.0472018	0.0284099	0.0521617	0.351662	-1.50774	down
ko05165	Human papillomavirus infection	0.839797	ENSSSCG00000001401	ENSSSCG00000001401	K02152	NA	ATPase H+ transporting V1 subunit G2 [Source:NCBI gene;Acc:100152358]	0.076847	0.137269	0.14906	0.045167	0.263849	0.368966	0.395026	0.27871	0.312535	-1.67791	down
ko05200	Pathways in cancer	0.950151	ENSSSCG00000020970	IL6	K05405	NA	interleukin 6 [Source:NCBI gene;Acc:399500]	2.51923	2.82316	4.87588	5.13129	5.23923	6.45856	9.15744	20.8768	0.367813	-1.44296	down

## Sheet: Supplemental Table S6
Table S6: Differentially expressed genes identified in the porcine corpus luteum after GW0724 (1 μmol/L) treatment
gene_id	gene_name	transcript_id	GO	KEGG	KO_ENTRY	EC	Description	trans_type	fc	log2(fc)	pval	qval	regulation	significant
ENSSSCG00000039803	ENSSSCG00000039803	ENSSSCT00000040469	GO:0046983(protein dimerization activity)	NA	NA	NA		protein_coding	0	-14.11	0	0	down	yes
ENSSSCG00000024860	ENSSSCG00000024860	ENSSSCT00000045870;ENSSSCT00000052684;ENSSSCT00000025174;ENSSSCT00000025366	GO:0005412(glucose:sodium symporter activity);GO:0005886(plasma membrane);GO:0006814(sodium ion transport);GO:0016020(membrane);GO:0016021(integral component of membrane);GO:0022857(transmembrane transporter activity);GO:0055085(transmembrane transport);GO:1904659(glucose transmembrane transport);GO:1904659(glucose transmembrane transport)	NA	NA	NA	sodium/glucose cotransporter 1-like [Source:NCBI gene;Acc:102159834]	protein_coding	0	-12.02	0	0	down	yes
ENSSSCG00000011735	SI	ENSSSCT00000039663	GO:0003824(catalytic activity);GO:0004553(hydrolase activity, hydrolyzing O-glycosyl compounds);GO:0005975(carbohydrate metabolic process);GO:0016020(membrane);GO:0016021(integral component of membrane);GO:0030246(carbohydrate binding)	00052(Galactose metabolism);00500(Starch and sucrose metabolism);04973(Carbohydrate digestion and absorption)	K01203	3.2.1.10;EC:3.2.1.48	sucrase-isomaltase [Source:NCBI gene;Acc:100623884]	protein_coding	0	-8.3	0	0	down	yes
ENSSSCG00000005665	PHYHD1	ENSSSCT00000006228	NA	NA	NA	NA	phytanoyl-CoA dioxygenase domain containing 1 [Source:NCBI gene;Acc:110255203]	protein_coding	0	-9.29	0	0	down	yes
ENSSSCG00000003987	ENSSSCG00000003987	ENSSSCT00000052086;ENSSSCT00000004409	GO:0000981(DNA-binding transcription factor activity, RNA polymerase II-specific);GO:0003676(nucleic acid binding);GO:0003700(DNA-binding transcription factor activity);GO:0005634(nucleus);GO:0006355(regulation of transcription, DNA-templated);GO:0006357(regulation of transcription by RNA polymerase II);GO:0046872(metal ion binding);GO:0046872(metal ion binding)	NA	NA	NA		protein_coding	0.08	-3.62	0	0.14	down	yes
ENSSSCG00000038607	GADL1	ENSSSCT00000038952;ENSSSCT00000061407	GO:0003824(catalytic activity);GO:0016829(lyase activity);GO:0016831(carboxy-lyase activity);GO:0019752(carboxylic acid metabolic process);GO:0030170(pyridoxal phosphate binding);GO:0030170(pyridoxal phosphate binding)	00410(beta-Alanine metabolism);00430(Taurine and hypotaurine metabolism);00770(Pantothenate and CoA biosynthesis);00770(Pantothenate and CoA biosynthesis)	K18966	4.1.1.11;EC:4.1.1.29	glutamate decarboxylase like 1 [Source:NCBI gene;Acc:100623700]	protein_coding	0.03	-4.86	0	1	down	yes
ENSSSCG00000000655	KLRF1	ENSSSCT00000000711;ENSSSCT00000038222	GO:0016020(membrane);GO:0016021(integral component of membrane);GO:0030246(carbohydrate binding);GO:0030246(carbohydrate binding)	NA	K10075	NA	killer cell lectin like receptor F1 [Source:NCBI gene;Acc:100144592]	protein_coding	0.08	-3.61	0	1	down	yes
ENSSSCG00000037120	TK1	ENSSSCT00000050137	GO:0000166(nucleotide binding);GO:0004797(thymidine kinase activity);GO:0005524(ATP binding);GO:0009157(deoxyribonucleoside monophosphate biosynthetic process);GO:0016301(kinase activity);GO:0016310(phosphorylation);GO:0016740(transferase activity);GO:0071897(DNA biosynthetic process)	00240(Pyrimidine metabolism);00983(Drug metabolism - other enzymes)	K00857	EC:2.7.1.21	thymidine kinase 1 [Source:NCBI gene;Acc:110255958]	protein_coding	0.42	-1.24	0	1	down	yes
ENSSSCG00000003891	CYP4A24	ENSSSCT00000037422;ENSSSCT00000063601;ENSSSCT00000024887;ENSSSCT00000004304;ENSSSCT00000055667;ENSSSCT00000038461	GO:0004497(monooxygenase activity);GO:0005506(iron ion binding);GO:0005783(endoplasmic reticulum);GO:0005789(endoplasmic reticulum membrane);GO:0016020(membrane);GO:0016021(integral component of membrane);GO:0016491(oxidoreductase activity);GO:0016705(oxidoreductase activity, acting on paired donors, with incorporation or reduction of molecular oxygen);GO:0020037(heme binding);GO:0046872(metal io…	00071(Fatty acid degradation);00590(Arachidonic acid metabolism);00830(Retinol metabolism);03320(PPAR signaling pathway);04270(Vascular smooth muscle contraction);04750(Inflammatory mediator regulation of TRP channels);04750(Inflammatory mediator regulation of TRP channels)	K07425;K18228	EC:1.14.14.80;EC:1.14.14.57	cytochrome P450 4A24 [Source:NCBI gene;Acc:403326]	protein_coding	0	-7.71	0	1	down	yes
ENSSSCG00000002700	ENSSSCG00000002700	ENSSSCT00000026364	GO:0000795(synaptonemal complex);GO:0007128(meiotic prophase I);GO:0007130(synaptonemal complex assembly);GO:0070193(synaptonemal complex organization)	NA	NA	NA		protein_coding	0.05	-4.39	0	1	down	yes
ENSSSCG00000024784	CACNA1S	ENSSSCT00000043789;ENSSSCT00000066256	GO:0005216(ion channel activity);GO:0005244(voltage-gated ion channel activity);GO:0005245(voltage-gated calcium channel activity);GO:0005262(calcium channel activity);GO:0005737(cytoplasm);GO:0005886(plasma membrane);GO:0005891(voltage-gated calcium channel complex);GO:0006811(ion transport);GO:0006816(calcium ion transport);GO:0006936(muscle contraction);GO:0008331(high voltage-gated calcium ch…	04010(MAPK signaling pathway);04020(Calcium signaling pathway);04022(cGMP-PKG signaling pathway);04024(cAMP signaling pathway);04260(Cardiac muscle contraction);04261(Adrenergic signaling in cardiomyocytes);04270(Vascular smooth muscle contraction);04723(Retrograde endocannabinoid signaling);04725(Cholinergic synapse);04726(Serotonergic synapse);04727(GABAergic synapse);04911(Insulin secretion);0…	K04857	NA	calcium voltage-gated channel subunit alpha1 S [Source:NCBI gene;Acc:100622149]	protein_coding	0	-7.86	0	1	down	yes
ENSSSCG00000004836	MKRN3	ENSSSCT00000005338	GO:0042802(identical protein binding);GO:0046872(metal ion binding)	NA	NA	NA	makorin ring finger protein 3 [Source:HGNC Symbol;Acc:HGNC:7114]	protein_coding	0	-10.55	0	1	down	yes
ENSSSCG00000034749	ENSSSCG00000034749	ENSSSCT00000006064;ENSSSCT00000065734	GO:0003924(GTPase activity);GO:0005769(early endosome);GO:0005829(cytosol);GO:0006886(intracellular protein transport);GO:0006895(Golgi to endosome transport);GO:0016020(membrane);GO:0016021(integral component of membrane);GO:0032482(Rab protein signal transduction);GO:0045335(phagocytic vesicle);GO:0090387(phagolysosome assembly involved in apoptotic cell clearance);GO:0090387(phagolysosome asse…	NA	NA	NA		protein_coding	0	-10.3	0	1	down	yes
ENSSSCG00000029334	MYT1L	ENSSSCT00000047435	GO:0000122(negative regulation of transcription by RNA polymerase II);GO:0000977(RNA polymerase II regulatory region sequence-specific DNA binding);GO:0001227(DNA-binding transcription repressor activity, RNA polymerase II-specific);GO:0001228(DNA-binding transcription activator activity, RNA polymerase II-specific);GO:0003700(DNA-binding transcription factor activity);GO:0005634(nucleus);GO:0006…	NA	K23193	NA	myelin transcription factor 1 like [Source:NCBI gene;Acc:100626723]	protein_coding	0	-8.08	0	1	down	yes
ENSSSCG00000017488	CSF3	ENSSSCT00000019041	GO:0005125(cytokine activity);GO:0005130(granulocyte colony-stimulating factor receptor binding);GO:0005576(extracellular region);GO:0005615(extracellular space);GO:0006955(immune response);GO:0008083(growth factor activity);GO:0008284(positive regulation of cell population proliferation);GO:0010469(regulation of signaling receptor activity);GO:0014068(positive regulation of phosphatidylinositol …	04060(Cytokine-cytokine receptor interaction);04151(PI3K-Akt signaling pathway);04630(Jak-STAT signaling pathway);04640(Hematopoietic cell lineage);04657(IL-17 signaling pathway);05144(Malaria)	K05423	NA	colony stimulating factor 3 [Source:NCBI gene;Acc:396839]	protein_coding	0.45	-1.16	0	1	down	yes
ENSSSCG00000035425	ENSSSCG00000035425	ENSSSCT00000060052	GO:0003735(structural constituent of ribosome);GO:0005622(intracellular);GO:0005840(ribosome);GO:0006412(translation)	NA	NA	NA		protein_coding	0	-8.51	0	1	down	yes
ENSSSCG00000026254	PRRG3	ENSSSCT00000050176;ENSSSCT00000064624;ENSSSCT00000062099	GO:0005509(calcium ion binding);GO:0005576(extracellular region);GO:0016020(membrane);GO:0016021(integral component of membrane);GO:0016021(integral component of membrane)	NA	NA	NA	proline rich and Gla domain 3 [Source:NCBI gene;Acc:100515642]	protein_coding	0	-10.48	0	1	down	yes
ENSSSCG00000000640	ENSSSCG00000000640	ENSSSCT00000000689	GO:0016020(membrane);GO:0016021(integral component of membrane);GO:0030246(carbohydrate binding)	04612(Antigen processing and presentation);04650(Natural killer cell mediated cytotoxicity)	K06541	NA	NKG2-A/NKG2-B type II integral membrane protein [Source:NCBI gene;Acc:100523789]	protein_coding	0.08	-3.61	0.01	1	down	yes
ENSSSCG00000000598	SLC15A5	ENSSSCT00000000643	GO:0015333(peptide:proton symporter activity);GO:0016020(membrane);GO:0016021(integral component of membrane);GO:0022857(transmembrane transporter activity);GO:0035672(oligopeptide transmembrane transport);GO:0035673(oligopeptide transmembrane transporter activity);GO:0042886(amide transport);GO:0055085(transmembrane transport);GO:1902600(proton transmembrane transport);GO:1904680(peptide transme…	NA	K14639	NA	solute carrier family 15 member 5 [Source:NCBI gene;Acc:100152242]	protein_coding	0	-10.09	0.01	1	down	yes
ENSSSCG00000017880	SPNS3	ENSSSCT00000019457;ENSSSCT00000055547	GO:0016020(membrane);GO:0016021(integral component of membrane);GO:0055085(transmembrane transport);GO:0055085(transmembrane transport)	NA	NA	NA	sphingolipid transporter 3 (putative) [Source:NCBI gene;Acc:100523208]	protein_coding	0.05	-4.24	0.01	1	down	yes
ENSSSCG00000012349	USP51	ENSSSCT00000013504	GO:0003682(chromatin binding);GO:0004843(thiol-dependent ubiquitin-specific protease activity);GO:0006508(proteolysis);GO:0006511(ubiquitin-dependent protein catabolic process);GO:0008233(peptidase activity);GO:0008234(cysteine-type peptidase activity);GO:0008270(zinc ion binding);GO:0010564(regulation of cell cycle process);GO:0010569(regulation of double-strand break repair via homologous recom…	NA	K11366	EC:3.4.19.12	ubiquitin specific peptidase 51 [Source:NCBI gene;Acc:100519179]	protein_coding	0.26	-1.96	0.01	1	down	yes
ENSSSCG00000003333	C1QTNF12	ENSSSCT00000003700	GO:0005179(hormone activity);GO:0005515(protein binding);GO:0005576(extracellular region);GO:0005615(extracellular space);GO:0010469(regulation of signaling receptor activity);GO:0010906(regulation of glucose metabolic process);GO:0035774(positive regulation of insulin secretion involved in cellular response to glucose stimulus);GO:0045721(negative regulation of gluconeogenesis);GO:0046324(regula…	NA	K21410	NA	C1q and TNF related 12 [Source:NCBI gene;Acc:100523314]	protein_coding	0.03	-5.16	0.01	1	down	yes
ENSSSCG00000033564	ENSSSCG00000033564	ENSSSCT00000044744;ENSSSCT00000056633	GO:0003676(nucleic acid binding);GO:0003676(nucleic acid binding)	NA	NA	NA	zinc finger protein 347-like [Source:NCBI gene;Acc:110261293]	protein_coding	0.16	-2.69	0.01	1	down	yes
ENSSSCG00000010701	BTBD16	ENSSSCT00000030603	NA	NA	K10487	NA	BTB domain containing 16 [Source:NCBI gene;Acc:100737536]	protein_coding	0.27	-1.87	0.01	1	down	yes
ENSSSCG00000014015	MRNIP	ENSSSCT00000015309;ENSSSCT00000015310	GO:0003682(chromatin binding);GO:0005634(nucleus);GO:0005654(nucleoplasm);GO:0006974(cellular response to DNA damage stimulus);GO:0007095(mitotic G2 DNA damage checkpoint);GO:0010212(response to ionizing radiation);GO:0030870(Mre11 complex);GO:0045860(positive regulation of protein kinase activity);GO:0071168(protein localization to chromatin);GO:1905168(positive regulation of double-strand break…	NA	NA	NA	MRN complex interacting protein [Source:NCBI gene;Acc:100518897]	protein_coding	0.44	-1.18	0.01	1	down	yes
ENSSSCG00000004098	ENSSSCG00000004098	ENSSSCT00000004531	GO:0005615(extracellular space);GO:0005886(plasma membrane);GO:0009897(external side of plasma membrane);GO:0098711(iron ion import across plasma membrane);GO:1990459(transferrin receptor binding);GO:1990641(response to iron ion starvation)	NA	NA	NA		protein_coding	0	-11.33	0.01	1	down	yes
ENSSSCG00000007497	GCNT7	ENSSSCT00000051408	GO:0000139(Golgi membrane);GO:0005794(Golgi apparatus);GO:0006486(protein glycosylation);GO:0008375(acetylglucosaminyltransferase activity);GO:0016020(membrane);GO:0016021(integral component of membrane);GO:0016740(transferase activity);GO:0016757(transferase activity, transferring glycosyl groups)	NA	NA	NA	glucosaminyl (N-acetyl) transferase family member 7 [Source:NCBI gene;Acc:100134987]	protein_coding	0.01	-7.42	0.01	1	down	yes
ENSSSCG00000004676	DUOXA2	ENSSSCT00000005162	GO:0005783(endoplasmic reticulum);GO:0005789(endoplasmic reticulum membrane);GO:0005829(cytosol);GO:0005886(plasma membrane);GO:0008104(protein localization);GO:0010729(positive regulation of hydrogen peroxide biosynthetic process);GO:0015031(protein transport);GO:0016020(membrane);GO:0016021(integral component of membrane);GO:0019899(enzyme binding);GO:0031252(cell leading edge);GO:0034613(cellu…	04918(Thyroid hormone synthesis)	K17232	NA	dual oxidase maturation factor 2 [Source:NCBI gene;Acc:100155365]	protein_coding	0	-13.07	0.01	1	down	yes
ENSSSCG00000026695	TNFSF14	ENSSSCT00000025464	GO:0005102(signaling receptor binding);GO:0005125(cytokine activity);GO:0005164(tumor necrosis factor receptor binding);GO:0005515(protein binding);GO:0005615(extracellular space);GO:0006915(apoptotic process);GO:0006955(immune response);GO:0010469(regulation of signaling receptor activity);GO:0010820(positive regulation of T cell chemotaxis);GO:0016020(membrane);GO:0016021(integral component of …	04060(Cytokine-cytokine receptor interaction);04064(NF-kappa B signaling pathway);05168(Herpes simplex virus 1 infection)	K05477	NA	TNF superfamily member 14 [Source:NCBI gene;Acc:100519468]	protein_coding	0	-9.63	0.01	1	down	yes
ENSSSCG00000021434	ENSSSCG00000021434	ENSSSCT00000026581	NA	NA	NA	NA		protein_coding	0.09	-3.44	0.01	1	down	yes
ENSSSCG00000033363	ENSSSCG00000033363	ENSSSCT00000054100	GO:0000122(negative regulation of transcription by RNA polymerase II);GO:0003677(DNA binding);GO:0005634(nucleus);GO:0006355(regulation of transcription, DNA-templated);GO:0006357(regulation of transcription by RNA polymerase II);GO:0035067(negative regulation of histone acetylation);GO:0043565(sequence-specific DNA binding)	05166(Human T-cell leukemia virus 1 infection)	K09341	NA	VENT homeobox [Source:NCBI gene;Acc:100154934]	protein_coding	0.4	-1.33	0.01	1	down	yes
ENSSSCG00000007181	ENSSSCG00000007181	ENSSSCT00000007856;ENSSSCT00000033347	GO:0005886(plasma membrane);GO:0016020(membrane);GO:0016021(integral component of membrane);GO:0022409(positive regulation of cell-cell adhesion);GO:0050766(positive regulation of phagocytosis);GO:0050870(positive regulation of T cell activation);GO:0050870(positive regulation of T cell activation)	NA	NA	NA		protein_coding	0.16	-2.67	0.01	1	down	yes
ENSSSCG00000021562	PLXNA4	ENSSSCT00000064268;ENSSSCT00000047876;ENSSSCT00000040479;ENSSSCT00000052184	GO:0002116(semaphorin receptor complex);GO:0005515(protein binding);GO:0005887(integral component of plasma membrane);GO:0007162(negative regulation of cell adhesion);GO:0007165(signal transduction);GO:0007399(nervous system development);GO:0007411(axon guidance);GO:0008045(motor neuron axon guidance);GO:0008360(regulation of cell shape);GO:0016020(membrane);GO:0016021(integral component of membr…	04360(Axon guidance);04360(Axon guidance)	K06820	NA	plexin A4 [Source:NCBI gene;Acc:100620243]	protein_coding	0.42	-1.25	0.02	1	down	yes
ENSSSCG00000033235	ENSSSCG00000033235	ENSSSCT00000041972	GO:0005198(structural molecule activity);GO:0005882(intermediate filament);GO:0045095(keratin filament)	NA	NA	NA	keratin, type II microfibrillar, component 7C-like [Source:NCBI gene;Acc:100621844]	protein_coding	0.44	-1.2	0.02	1	down	yes
[truncated: 68 more rows]

## Sheet: Supplemental Table S7
Table S7: Results of Gene Ontology enrichment analysis of differentially expressed genes significantly modulated by GW0724 (1 μmol/L) treatment in the porcine corpus luteum
GO_ID	GO_Term	GO_function	GO_class	pvalue	Gene_ID	Gene_name	Description	FPKM.GW0724_1_1	FPKM.GW0724_1_2	FPKM.GW0724_1_3	FPKM.GW0724_1_4	FPKM.LPS_1	FPKM.LPS_2	FPKM.LPS_3	FPKM.LPS_4	fc	log2(fc)	regulation
[truncated: 971 more rows]

## Sheet: Supplemental Table S8
Table S8: Results of KEEG enrichment analysis of differentially expressed genes significantly modulated by GW0724 (1 μmol/L) in porcine corpus luteum
[truncated: 124 more rows]

[truncated: 9 more sheets: Supplemental Table S9, Supplemental Table S10, Supplemental Table S11, Supplemental Table S12, Supplemental Table S13, Supplemental Table S14, Supplemental Table S15, Supplemental Table S16, Supplemental Table S17]
